# Supplementary material for: Transcriptome Analysis Reveals the Mechanism by Which Exogenous Melatonin Treatment Delays Leaf Senescence of Postharvest Chinese Kale (Brassica oleracea var. alboglabra)
Source: MDPI journal article supplement (doi:10.3390/ijms25042250), 2024-02-13
Supplement: s1 [file s1]

Supplementary Figure S1

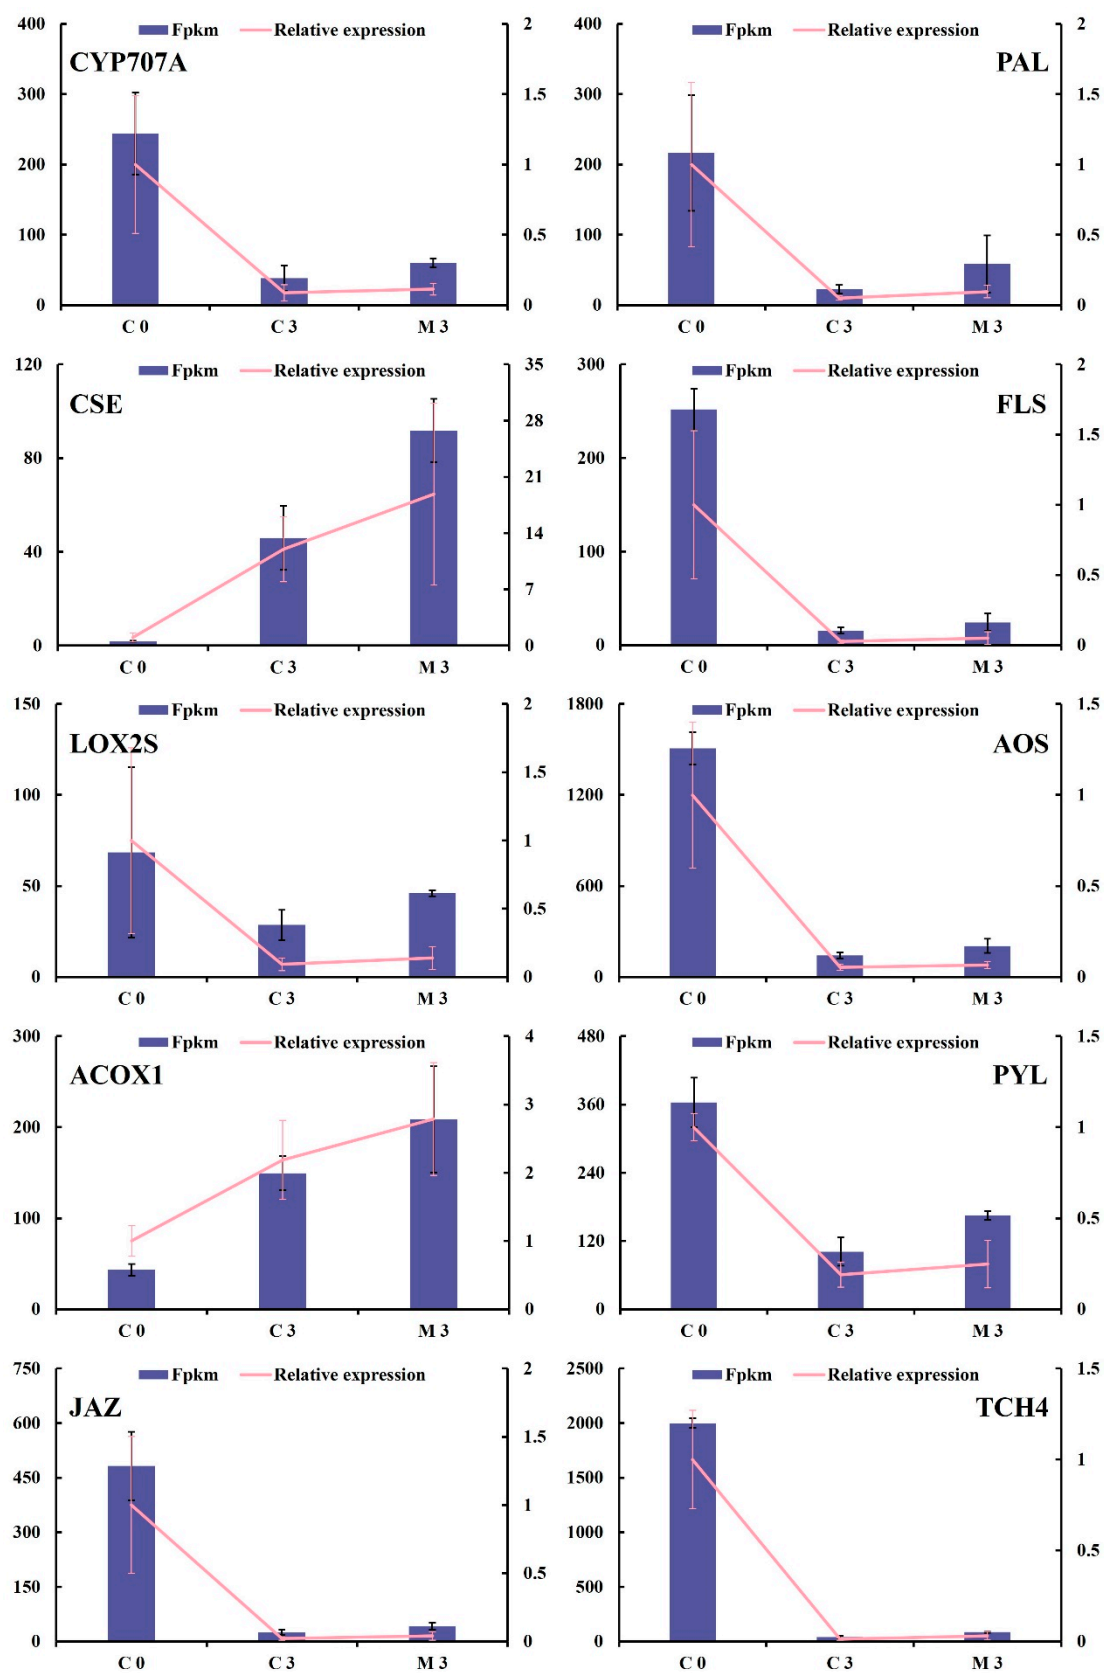

---

**Supplementary Figure S1** Expression pattern of ten selected DEGs obtained by RNA-Seq and qRT-PCR.
