# Supplementary material for: Transcriptome Analysis Reveals the Mechanism by Which Exogenous Melatonin Treatment Delays Leaf Senescence of Postharvest Chinese Kale (Brassica oleracea var. alboglabra)
Source: Int J Mol Sci. 2024 Feb 13;25(4):2250. doi: 10.3390/ijms25042250 (PMC10889248; doi:10.3390/ijms25042250)
Supplement: Supplementary file 1 [file ijms-25-02250-s001.zip]

Archive with 7 entries (7 files):
- Di et al. Supplementary Figure S1.pdf
- Di et al. Supplementary Table S1.xlsx
- Di et al. Supplementary Table S2.xlsx
- Di et al. Supplementary Table S3.xlsx
- Di et al. Supplementary Table S4.xlsx
- Di et al. Supplementary Table S5.xlsx
- Di et al. Supplementary Table S6.xlsx
