# Supplementary material for: Transcriptome Analysis Reveals the Mechanism by Which Exogenous Melatonin Treatment Delays Leaf Senescence of Postharvest Chinese Kale (Brassica oleracea var. alboglabra)
Source: Int J Mol Sci. 2024 Feb 13;25(4):2250. doi: 10.3390/ijms25042250 (PMC10889248; doi:10.3390/ijms25042250)
Supplement: Supplementary file 1 [file ijms-25-02250-s001.zip › Di et al. Supplementary Table S1.xlsx]

## Sheet: Sheet 1
Supplementary Table 1 A dataset of continuously up and down-regulated DEGs during storage.
#ID	gene_name	nr_symbol	C0-1_FPKM	C0-2_FPKM	C0-3_FPKM	C3-1_FPKM	C3-2_FPKM	C3-3_FPKM	C5-1_FPKM	C5-2_FPKM	C5-3_FPKM	C0_vs_C3_DESeq2_log2FC	C0_vs_C3_DESeq2_(Pvalue_0.05_FC_1.5)_regulated	C3_vs_C5_DESeq2_log2FC	C3_vs_C5_DESeq2_(Pvalue_0.05_FC_1.5)_regulated	KEGG_annotation	KEGG_pathway_annotation
Brassica_oleracea_newGene_1019	--	LOC103842764	0.008321	0.282789	0.303806	10.157	12.2418	12.0277	27.3142	34.7164	16.7313	5.33742	up	1.60111	up	K15255|5.7e-66|boe:106314194|K15255 ATP-dependent DNA helicase PIF1 [EC:3.6.4.12] | (RefSeq) uncharacterized protein LOC106314194	--
Brassica_oleracea_newGene_10233	--	--	0.168535	0.103024	0.61512	1.38523	2.25341	1.20283	8.66529	5.17675	11.9647	2.11736	up	2.90789	up	--	--
Brassica_oleracea_newGene_10242	--	--	0.130749	0.147047	1.1332	18.1915	6.2842	5.29026	41.5751	7.48986	96.1328	4.12395	up	2.8556	up	K11817|0.0e+00|bna:106425715|K11817 indole-3-acetaldehyde oxidase [EC:1.2.3.7] | (RefSeq) indole-3-acetaldehyde oxidase-like	Tryptophan metabolism (ko00380)
Brassica_oleracea_newGene_10259	--	--	0.089001	0.225924	0	2.58804	2.88162	0.493344	8.61118	3.14428	12.2873	3.52234	up	2.45105	up	K22378|2.3e-08|ghi:107892427|K22378 E3 ubiquitin-protein ligase RNF181 [EC:2.3.2.27] | (RefSeq) E3 ubiquitin-protein ligase RING1-like	--
Brassica_oleracea_newGene_10438	--	--	2.07953	2.88657	1.2708	6.80624	6.32805	6.88547	11.1532	9.6879	5.76511	1.3686	up	0.784484	up	--	--
Brassica_oleracea_newGene_10467	--	--	0.300712	1.45005	0.305577	3.60609	6.30253	2.97335	8.95557	8.54176	24.276	2.34021	up	2.25497	up	K03006|4.3e-87|adu:107466525|K03006 DNA-directed RNA polymerase II subunit RPB1 [EC:2.7.7.6] | (RefSeq) LOW QUALITY PROTEIN: DNA-directed RNA polymerase II subunit 1-like	RNA polymerase (ko03020)
Brassica_oleracea_newGene_10602	--	--	0.205335	0.163835	0.40365	4.45383	3.28659	3.64626	6.04278	4.66135	3.07099	3.58859	up	0.65576	up	--	--
Brassica_oleracea_newGene_10985	--	--	0.338611	0.227209	0.101097	1.14876	1.62793	1.21075	2.28276	1.9804	1.10649	2.17491	up	0.793661	up	--	--
Brassica_oleracea_newGene_10994	--	--	2.06481	1.38146	2.30624	3.71769	4.40331	4.70158	7.80062	5.77797	9.89941	0.855984	up	1.3513	up	--	--
Brassica_oleracea_newGene_11384	--	LOC106323001	0	0.134612	0.020234	8.20745	5.67434	4.73062	9.87964	12.3592	7.21322	6.51183	up	1.03121	up	K05387|0.0e+00|boe:106323001|K05387 glutamate receptor, ionotropic, plant | (RefSeq) glutamate receptor 1.3-like	--
Brassica_oleracea_newGene_11598	--	LOC108828941	0.262421	0.128669	0.176222	1.89594	1.67277	1.39729	5.02362	1.79675	5.32007	2.85147	up	1.77724	up	K11643|2.2e-38|bna:106372821|K11643 chromodomain-helicase-DNA-binding protein 4 [EC:3.6.4.12] | (RefSeq) CHD3-type chromatin-remodeling factor PICKLE-like	--
Brassica_oleracea_newGene_11655	--	--	0.454517	0.591207	0.167623	11.3451	13.3167	12.332	20.98	21.6221	12.4954	4.57523	up	0.93898	up	--	--
Brassica_oleracea_newGene_11740	--	LOC106331972	0.597018	0.674641	0.807406	2.2163	2.66093	3.58389	16.29	4.67953	1.50273	1.71496	up	1.67339	up	K13229|2.3e-87|sbi:8070754|K13229 2,4-dihydroxy-1,4-benzoxazin-3-one-glucoside dioxygenase [EC:1.14.11.59] | (RefSeq) DIBOA-glucoside dioxygenase BX6	Benzoxazinoid biosynthesis (ko00402)
Brassica_oleracea_newGene_11873	--	--	0.110675	0.176243	0.18477	5.6381	4.05204	3.8625	12.754	6.66967	25.4684	4.43921	up	2.30733	up	--	--
Brassica_oleracea_newGene_11912	--	--	6.91731	9.93591	6.64461	124.052	109.341	46.8547	499.866	80.0392	694.555	3.03069	up	2.6223	up	--	--
Brassica_oleracea_newGene_11972	--	LOC106388305	0.376797	0.195807	0.703908	10.864	8.16964	14.1719	39.3578	6.60774	112.396	4.26036	up	2.89031	up	--	--
Brassica_oleracea_newGene_1964	--	--	0.909971	0.370786	0.621727	1.88549	1.89854	1.3383	1.49312	0.972794	9.94145	1.2552	up	1.97195	up	--	--
Brassica_oleracea_newGene_2297	--	--	0.223637	1.05008	1.20812	4.21662	4.15231	4.2972	10.3155	5.68659	4.83845	2.33072	up	1.03776	up	--	--
Brassica_oleracea_newGene_2432	--	--	0.481674	0.087697	0.25276	1.73341	1.3003	1.28814	2.44818	1.49584	2.87384	2.03081	up	1.13647	up	--	--
Brassica_oleracea_newGene_2563	--	LOC106342186	13.0991	7.17777	10.2702	68.9267	55.3891	52.8407	86.4786	67.5443	54.526	2.23248	up	0.630357	up	K13229|1.5e-44|sita:101778204|K13229 2,4-dihydroxy-1,4-benzoxazin-3-one-glucoside dioxygenase [EC:1.14.11.59] | (RefSeq) DIBOA-glucoside dioxygenase BX6	Benzoxazinoid biosynthesis (ko00402)
Brassica_oleracea_newGene_264	--	LOC103833395	0.045094	0.087695	0.078116	1.03313	1.12852	1.09526	2.02162	1.45701	3.54867	3.59094	up	1.63414	up	K22804|6.8e-151|bna:106442438|K22804 structural maintenance of chromosomes protein 6 | (RefSeq) structural maintenance of chromosomes protein 6B-like	--
Brassica_oleracea_newGene_2811	--	LOC106339210	4.31804	5.95595	2.86947	8.18113	7.97938	11.599	17.2668	13.8843	9.04063	0.806369	up	0.912974	up	--	--
Brassica_oleracea_newGene_3053	--	LOC106343714	1.37805	1.85103	2.4718	5.27948	4.13811	4.87989	6.46001	3.02792	26.9376	1.12673	up	1.99769	up	--	--
Brassica_oleracea_newGene_3108	--	--	12.2159	21.9348	34.1608	101.601	136.536	104.427	123.479	191.263	146.365	2.0118	up	0.844528	up	--	--
Brassica_oleracea_newGene_329	--	LOC106333544	0.138709	0.168071	0.235666	2.23565	0.916916	1.06658	2.97038	4.54826	3.3049	2.60299	up	1.76758	up	K13449|1.3e-90|bna:106386288|K13449 pathogenesis-related protein 1 | (RefSeq) pathogenesis-related protein 1-like	MAPK signaling pathway - plant (ko04016);; Plant hormone signal transduction (ko04075);; Plant-pathogen interaction (ko04626)
Brassica_oleracea_newGene_332	--	--	0.033225	0	0	6.17842	5.78716	3.52578	13.3893	7.46356	9.58073	8.51325	up	1.39031	up	--	--
Brassica_oleracea_newGene_3336	--	--	0.162362	0.127811	0.056512	2.65231	3.36176	2.83695	42.6633	9.32216	6.54931	3.24753	up	3.31341	up	K03006|4.6e-45|adu:107466525|K03006 DNA-directed RNA polymerase II subunit RPB1 [EC:2.7.7.6] | (RefSeq) LOW QUALITY PROTEIN: DNA-directed RNA polymerase II subunit 1-like	RNA polymerase (ko03020)
Brassica_oleracea_newGene_3506	--	--	0.285586	0.078691	0.252078	0.603006	0.38775	1.04264	3.0989	1.25693	0.805314	1.39347	up	1.6805	up	--	--
Brassica_oleracea_newGene_3567	--	LOC108845081	0	0.062385	0.01777	0.267451	0.274704	0.316248	0.57022	0.21505	0.813573	3.00613	up	1.42431	up	K14297|1.0e-17|nsy:104215433|K14297 nuclear pore complex protein Nup98-Nup96 | (RefSeq) flocculation protein FLO11-like isoform X1	RNA transport (ko03013)
Brassica_oleracea_newGene_3575	--	--	0	0.448383	0.400214	4.94931	2.81118	0.594158	9.58918	12.5749	46.1525	3.02207	up	3.28337	up	--	--
Brassica_oleracea_newGene_3596	--	--	0.137449	0	0.183109	1.35821	2.32971	0.752886	6.99003	1.95135	11.3078	3.45323	up	2.73028	up	--	--
Brassica_oleracea_newGene_393	--	LOC106332829	0.9031	0.44042	2.4919	87.0791	79.4464	39.7681	183.023	101.314	421.232	5.42937	up	2.35408	up	--	--
Brassica_oleracea_newGene_4261	--	LOC106299577	0.192317	0.114746	0.249924	11.9136	11.5073	13.913	12.5219	24.7146	17.191	5.59969	up	0.96183	up	--	--
Brassica_oleracea_newGene_4394	--	--	3.14986	1.98302	1.02276	8.76994	10.0026	11.0561	14.4881	9.67508	11.456	1.9912	up	0.680045	up	--	--
Brassica_oleracea_newGene_4429	--	--	0	0	0	5.57885	5.26407	4.46172	11.587	10.6922	8.90809	9.17852	up	1.42029	up	--	--
Brassica_oleracea_newGene_4461	--	--	3.50446	1.65343	1.55085	8.5156	4.9734	3.30742	10.2839	8.10678	5.39629	1.04517	up	0.898102	up	K13459|0.0e+00|bna:106406636|K13459 disease resistance protein RPS2 | (RefSeq) probable disease resistance protein At1g15890	Plant-pathogen interaction (ko04626)
Brassica_oleracea_newGene_4671	--	--	0	0.367919	0.557041	3.76843	3.65006	3.48306	11.9899	8.02455	21.9303	3.17251	up	2.47965	up	--	--
Brassica_oleracea_newGene_4780	--	--	0	0	0	1.3738	2.68731	1.07841	2.24538	2.3954	2.87476	8.90034	up	1.48418	up	--	--
Brassica_oleracea_newGene_5004	--	--	1.06675	1.24243	0.842195	5.30035	5.88028	2.47493	10.2007	10.77	33.03	1.68089	up	2.61853	up	K03006|1.5e-74|adu:107466525|K03006 DNA-directed RNA polymerase II subunit RPB1 [EC:2.7.7.6] | (RefSeq) LOW QUALITY PROTEIN: DNA-directed RNA polymerase II subunit 1-like	RNA polymerase (ko03020)
Brassica_oleracea_newGene_5227	--	--	0	0	0.053784	1.85987	2.89738	0.648457	1.60872	3.75318	14.9491	6.16454	up	2.54242	up	--	--
Brassica_oleracea_newGene_5230	--	--	1.33542	2.61866	1.76204	3.59207	5.56508	5.46263	6.52835	7.66859	6.32525	1.35682	up	0.92689	up	--	--
Brassica_oleracea_newGene_5241	--	LOC106406449	31.5514	20.1024	31.6976	117.061	113.37	74.2444	131.774	163.201	220.696	1.5771	up	1.24279	up	K00695|1.5e-61|mtr:MTR_6g478030|K00695 sucrose synthase [EC:2.4.1.13] | (RefSeq) sucrose synthase	Starch and sucrose metabolism (ko00500)
Brassica_oleracea_newGene_5421	--	--	1.32197	1.57634	2.17832	8.20944	7.3641	8.14948	10.8362	8.72921	15.076	1.81574	up	1.03573	up	--	--
Brassica_oleracea_newGene_5692	--	--	0	0	0	3.41817	3.69538	2.23466	7.13487	4.55477	4.48672	9.59241	up	1.19279	up	--	--
Brassica_oleracea_newGene_5702	--	--	2.38132	6.29088	3.52735	10.073	7.02097	10.7164	17.0195	16.2591	5.7766	0.923971	up	0.79317	up	--	--
Brassica_oleracea_newGene_6736	--	LOC106348988	0.155086	0.075556	0.281519	5.60557	5.1006	4.01193	15.2933	5.15759	27.6577	4.51198	up	2.22997	up	K05387|0.0e+00|bna:106348988|K05387 glutamate receptor, ionotropic, plant | (RefSeq) glutamate receptor 1.2-like	--
Brassica_oleracea_newGene_68	--	--	0.574644	0.184087	0.310268	2.36908	1.17987	1.29082	5.54876	3.29043	6.98617	1.95779	up	2.22134	up	K10268|9.7e-66|aof:109825399|K10268 F-box and leucine-rich repeat protein 2/20 | (RefSeq) F-box/LRR-repeat protein 20-like	--
Brassica_oleracea_newGene_6983	--	--	1.90183	2.34573	1.56765	4.52845	4.36831	3.69533	6.50866	6.79354	6.63009	0.861521	up	1.07531	up	K09338|6.7e-144|brp:103838097|K09338 homeobox-leucine zipper protein | (RefSeq) LOW QUALITY PROTEIN: homeobox-leucine zipper protein HAT7	--
Brassica_oleracea_newGene_7015	--	LOC106398211	3.73517	3.21903	3.69648	23.5145	20.8118	15.2539	50.7236	30.3987	62.8685	2.15355	up	1.72356	up	K24104|6.3e-94|thj:104799061|K24104 GPN-loop GTPase | (RefSeq) LOW QUALITY PROTEIN: uncharacterized protein LOC104799061	--
Brassica_oleracea_newGene_7018	--	--	0.06488	0.316558	0.278002	9.11651	8.9214	5.50299	17.4803	8.04057	37.7848	4.80616	up	2.00558	up	K24104|1.2e-83|thj:104799061|K24104 GPN-loop GTPase | (RefSeq) LOW QUALITY PROTEIN: uncharacterized protein LOC104799061	--
Brassica_oleracea_newGene_7127	--	--	1.30261	1.26109	0.48131	9.40524	11.6235	5.04658	29.236	11.5142	31.6705	2.70985	up	1.90189	up	--	--
Brassica_oleracea_newGene_7190	--	LOC106407695	0.279549	0.609519	0.271348	3.78995	2.22034	1.24646	7.9829	4.50873	3.51906	2.31207	up	1.47946	up	K00423|4.3e-101|atr:18448195|K00423 L-ascorbate oxidase [EC:1.10.3.3] | (RefSeq) L-ascorbate oxidase	Ascorbate and aldarate metabolism (ko00053)
Brassica_oleracea_newGene_7248	--	LOC111212645	0.447104	0.147751	0.382576	1.68301	0.77792	1.55948	2.9329	1.34198	3.59006	2.00435	up	1.46058	up	--	--
Brassica_oleracea_newGene_7776	--	LOC106310210	0.060177	0.01693	0.128461	7.11058	5.5832	3.12085	12.3875	10.191	15.4705	5.84401	up	1.74041	up	K13460|4.2e-183|ath:AT1G12220|K13460 disease resistance protein RPS5 | (RefSeq) RPS5; Disease resistance protein (CC-NBS-LRR class) family	Plant-pathogen interaction (ko04626)
Brassica_oleracea_newGene_7830	--	--	0	0	0	4.59033	5.10059	1.996	30.5716	11.5123	29.6101	9.57176	up	3.08397	up	K00993|1.2e-18|bna:106453259|K00993 ethanolaminephosphotransferase [EC:2.7.8.1] | (RefSeq) uncharacterized protein LOC106453259	Phosphonate and phosphinate metabolism (ko00440);; Glycerophospholipid metabolism (ko00564);; Ether lipid metabolism (ko00565)
Brassica_oleracea_newGene_784	--	--	0	0	0.014063	0.750097	1.09528	1.30251	2.90934	3.67054	2.2848	7.24826	up	1.9615	up	--	--
Brassica_oleracea_newGene_7959	--	LOC106307784	0.065863	0.228649	0	1.0972	1.74466	2.65728	4.89448	3.13302	1.89129	3.66862	up	1.19481	up	K10405|7.3e-32|csat:104731937|K10405 kinesin family member C1 | (RefSeq) kinesin-like protein KIN-14N isoform X1	--
Brassica_oleracea_newGene_7965	--	--	0	0.543486	0	21.3621	23.7475	8.49601	26.0503	12.205	115.283	6.24083	up	2.17111	up	--	--
Brassica_oleracea_newGene_8084	--	--	0.025324	0.157237	0.34175	27.0571	34.6355	15.9677	82.5457	39.5974	116.001	6.80411	up	2.13042	up	--	--
Brassica_oleracea_newGene_8092	--	LOC106309056	0.029283	0.487507	0.394471	13.8282	17.0586	5.74851	29.1517	16.9415	58.6394	4.94857	up	2.06665	up	K13963|2.3e-162|ath:AT2G25240|K13963 serpin B | (RefSeq) CCP3; Serine protease inhibitor (SERPIN) family protein	--
Brassica_oleracea_newGene_8318	--	--	0.246515	0.506272	0.482481	1.14511	1.079	1.55984	1.16925	2.46648	2.86533	1.11375	up	1.24991	up	K00924|8.0e-176|pavi:110759333|K00924 kinase [EC:2.7.1.-] | (RefSeq) shaggy-related protein kinase theta	--
Brassica_oleracea_newGene_8438	--	--	10.3292	6.52143	5.14276	14.2259	14.8217	14.4202	18.3359	20.0358	15.6978	0.704042	up	0.706216	up	--	--
Brassica_oleracea_newGene_8454	--	LOC106436770	1.9779	0.825762	0.41701	12.8057	10.7945	11.1155	24.3203	13.0084	9.55267	3.22074	up	0.73858	up	K09422|3.9e-179|bna:106436770|K09422 transcription factor MYB, plant | (RefSeq) transcription factor MYB51-like	--
Brassica_oleracea_newGene_8523	--	BNAC08G40290D	0.056612	0.082792	0.077081	4.33022	3.03395	2.81724	18.5236	15.4718	24.7522	5.01958	up	3.01089	up	K00993|7.3e-108|bna:106453259|K00993 ethanolaminephosphotransferase [EC:2.7.8.1] | (RefSeq) uncharacterized protein LOC106453259	Phosphonate and phosphinate metabolism (ko00440);; Glycerophospholipid metabolism (ko00564);; Ether lipid metabolism (ko00565)
Brassica_oleracea_newGene_8683	--	--	0.393854	0.59978	0.129078	12.6008	6.08841	5.15044	10.3006	13.0195	30.01	4.10994	up	1.7194	up	K01537|1.5e-23|boe:106309389|K01537 P-type Ca2+ transporter type 2C [EC:7.2.2.10] | (RefSeq) calcium-transporting ATPase 4, endoplasmic reticulum-type-like	--
Brassica_oleracea_newGene_8688	--	--	0.071295	0	0	6.80657	4.50266	3.81418	13.235	23.7426	12.0995	6.6602	up	2.06765	up	--	--
Brassica_oleracea_newGene_8822	--	--	0.136139	0.363444	0.717905	31.7348	20.3029	11.6157	139.93	27.8608	82.0631	5.32708	up	2.40638	up	--	--
Brassica_oleracea_newGene_8929	--	LOC106448985	0.080001	0.099295	0.033408	2.81949	1.58093	0.767803	4.08848	3.00945	4.54444	4.30852	up	1.63414	up	K22804|1.6e-76|bna:106442438|K22804 structural maintenance of chromosomes protein 6 | (RefSeq) structural maintenance of chromosomes protein 6B-like	--
Brassica_oleracea_newGene_9128	--	--	2.64683	2.69931	2.68454	5.65203	5.77209	4.67893	5.74369	6.70957	8.84171	0.705543	up	0.879023	up	--	--
Brassica_oleracea_newGene_9305	--	--	0.630685	0.159706	0.194141	5.30725	4.49071	3.31971	8.43576	10.4101	3.98401	3.39381	up	1.13536	up	--	--
Brassica_oleracea_newGene_9328	--	LOC106317118	0.290592	0.355355	0.276294	2.83127	2.33517	1.52853	4.3718	2.33494	16.9189	2.48992	up	2.51286	up	--	--
Brassica_oleracea_newGene_9655	--	--	2.33275	1.68426	2.74085	19.7852	15.8317	12.0279	30.9423	20.7532	23.5359	2.42621	up	1.02177	up	K01176|2.6e-60|sbi:8065370|K01176 alpha-amylase [EC:3.2.1.1] | (RefSeq) alpha-amylase isozyme 2A	Starch and sucrose metabolism (ko00500)
Brassica_oleracea_newGene_9886	--	--	1.17227	1.53451	0.782885	4.54217	3.77798	2.71934	33.2694	13.0166	29.0432	1.36737	up	3.22731	up	--	--
Brassica_oleracea_newGene_9947	--	LOC106316628	1.33743	2.26386	2.39205	30.374	26.7686	24.2295	41.088	61.0659	18.3559	3.43673	up	0.884673	up	K12835|1.7e-25|cmax:111493042|K12835 ATP-dependent RNA helicase DDX42 [EC:3.6.4.13] | (RefSeq) DEAD-box ATP-dependent RNA helicase 24 isoform X1	Spliceosome (ko03040)
gene_Bol004411	gene_Bol004411	LOC106385773	0.224105	0.420222	0.88374	10.1777	8.16744	5.7466	29.3381	6.37956	33.0147	3.63446	up	2.02936	up	K22771|1.7e-144|qsu:112013151|K22771 flavonol-3-O-L-rhamnoside-7-O-glucosyltransferase [EC:2.4.1.-] | (RefSeq) UDP-glycosyltransferase 73C6-like	Flavone and flavonol biosynthesis (ko00944)
gene_Bol004466	gene_Bol004466	LOC106391205	0.617037	0.686952	0.905745	9.24801	8.44325	7.73128	12.8427	10.374	22.5772	3.20274	up	1.37175	up	K11714|8.6e-10|sind:105173115|K11714 rhamnogalacturonan II specific xylosyltransferase [EC:2.4.2.-] | (RefSeq) UDP-D-xylose:L-fucose alpha-1,3-D-xylosyltransferase MGP4	--
gene_Bol004594	gene_Bol004594	--	3.36393	2.70021	1.66304	89.3509	96.4899	53.9526	94.8782	132.431	82.8245	4.67284	up	0.75604	up	K24104|4.1e-74|thj:104799061|K24104 GPN-loop GTPase | (RefSeq) LOW QUALITY PROTEIN: uncharacterized protein LOC104799061	--
gene_Bol004674	gene_Bol004674	--	33.9432	45.3385	40.7333	77.3645	88.0042	82.4019	112.648	110.572	119.544	0.743967	up	0.906781	up	K14011|6.0e-115|boe:106307033|K14011 UBX domain-containing protein 6 | (RefSeq) plant UBX domain-containing protein 2	Protein processing in endoplasmic reticulum (ko04141)
gene_Bol004677	gene_Bol004677	--	25.7512	26.4525	28.7007	51.2843	56.8145	66.2374	63.061	64.6462	83.5626	0.804857	up	0.745858	up	K01184|2.3e-06|bna:106400152|K01184 polygalacturonase [EC:3.2.1.15] | (RefSeq) polygalacturonase	Pentose and glucuronate interconversions (ko00040)
gene_Bol004678	gene_Bol004678	--	16.1199	22.8716	18.5449	40.1456	37.8425	36.0583	54.2612	46.9812	56.8906	0.685034	up	0.91826	up	--	--
gene_Bol004733	gene_Bol004733	--	3.07905	3.4347	3.58752	50.1901	46.6489	61.678	88.879	107.353	66.4698	3.66352	up	1.11313	up	K05399|2.5e-113|hbr:110670023|K05399 lipopolysaccharide-binding protein | (RefSeq) putative BPI/LBP family protein At1g04970 isoform X1	--
gene_Bol004811	gene_Bol004811	LOC106381913	14.7614	8.67818	11.123	117.662	130.587	32.7798	280.776	271.333	1173	2.74451	up	3.23478	up	K02575|8.0e-310|bna:106381913|K02575 MFS transporter, NNP family, nitrate/nitrite transporter | (RefSeq) high affinity nitrate transporter 2.6	Nitrogen metabolism (ko00910)
gene_Bol004879	gene_Bol004879	--	32.0884	29.363	29.5611	69.1947	62.1895	65.259	71.2238	92.1176	77.6188	0.81311	up	0.717792	up	K01408|0.0e+00|bna:106396187|K01408 insulysin [EC:3.4.24.56] | (RefSeq) insulin-degrading enzyme-like 1, peroxisomal	--
gene_Bol004907	gene_Bol004907	--	0.761836	0.066173	0.107946	189.848	190.752	40.29	514.705	408.804	275.937	8.49353	up	1.87029	up	K00103|0.0e+00|boe:106339293|K00103 L-gulonolactone oxidase [EC:1.1.3.8] | (RefSeq) L-gulonolactone oxidase 2	Ascorbate and aldarate metabolism (ko00053)
gene_Bol004913	gene_Bol004913	LOC106340151	87.8786	73.2779	62.4049	192.006	220.708	80.1285	289.681	288.903	650.35	0.858565	up	1.85473	up	K23490|7.0e-77|boe:106340151|K23490 cytochrome b5 | (RefSeq) cytochrome B5 isoform C	--
gene_Bol005036	gene_Bol005036	LOC106409473	3.98741	4.09713	6.527	26.9157	23.0515	11.0776	42.2888	23.8217	30.8723	1.75873	up	1.08657	up	--	--
gene_Bol005049	gene_Bol005049	--	11.9254	8.92346	6.80823	33.1784	31.8709	24.8249	38.4314	30.0321	32.9247	1.41194	up	0.598354	up	K11584|7.5e-190|boe:106303273|K11584 serine/threonine-protein phosphatase 2A regulatory subunit B' | (RefSeq) serine/threonine protein phosphatase 2A 59 kDa regulatory subunit B' gamma isoform	mRNA surveillance pathway (ko03015)
gene_Bol005050	gene_Bol005050	--	0.911176	2.49259	2.89602	57.9411	48.1354	27.8833	113.978	73.6017	170.535	4.09315	up	1.93125	up	K11592|2.4e-39|lsv:111902034|K11592 endoribonuclease Dicer [EC:3.1.26.-] | (RefSeq) endoribonuclease Dicer homolog 1	--
gene_Bol005064	gene_Bol005064	LOC106302191	1654.83	1066.97	2094.78	3670.48	3408.38	2403.06	6827.67	5454.12	8906.77	0.678608	up	1.64104	up	--	--
gene_Bol005069	gene_Bol005069	LOC106439504	7.65341	7.77732	2.93931	538.692	528.549	198.275	594.885	578.836	642.552	5.82556	up	0.958497	up	K00679|1.1e-34|cic:CICLE_v10027727mg|K00679 phospholipid:diacylglycerol acyltransferase [EC:2.3.1.158] | (RefSeq) hypothetical protein	Glycerolipid metabolism (ko00561)
gene_Bol005152	gene_Bol005152	--	1.02091	2.5696	2.36063	17.0152	23.1762	8.93877	34.0147	21.1242	80.5665	2.70372	up	2.03148	up	--	--
gene_Bol005225	gene_Bol005225	--	2.74988	2.24937	3.25375	17.8975	17.6212	16.7229	24.173	26.0334	38.9559	2.34348	up	1.25979	up	--	--
gene_Bol005235	gene_Bol005235	--	0.629924	2.36956	2.05982	19.9938	21.7509	15.201	27.9058	33.806	18.2432	3.1654	up	0.851545	up	K08311|3.9e-08|mis:MICPUN_59826|K08311 putative (di)nucleoside polyphosphate hydrolase [EC:3.6.1.-] | (RefSeq) predicted protein	RNA degradation (ko03018)
gene_Bol005290	gene_Bol005290	LOC103835422	44.0255	39.5923	71.3651	122.637	111.463	91.1853	215.006	156.122	139.945	0.764406	up	1.04625	up	K09775|9.9e-86|brp:103835422|K09775 uncharacterized protein | (RefSeq) uncharacterized membrane protein YuiD	--
gene_Bol005314	gene_Bol005314	LOC106328800	125.987	77.4486	121.659	653.888	647.664	329.943	711.224	1026.35	1550.83	2.03778	up	1.51794	up	K01658|4.8e-154|bna:106361939|K01658 anthranilate synthase component II [EC:4.1.3.27] | (RefSeq) anthranilate synthase beta subunit 1, chloroplastic	Phenylalanine, tyrosine and tryptophan biosynthesis (ko00400);; Biosynthesis of amino acids (ko01230)
gene_Bol005317	gene_Bol005317	LOC106328451	26.3345	30.9104	40.1244	84.673	84.5822	102.584	128.804	114.355	146.849	1.17228	up	0.979177	up	K01191|4.9e-36|pxb:103958275|K01191 alpha-mannosidase [EC:3.2.1.24] | (RefSeq) alpha-mannosidase At3g26720-like	Other glycan degradation (ko00511)
gene_Bol005318	gene_Bol005318	--	159.715	172.247	243.61	627.474	667.235	489.694	831.349	706.679	928.156	1.32975	up	0.920775	up	--	--
gene_Bol005379	gene_Bol005379	--	11.9657	14.3462	9.96442	28.4445	20.4215	24.1414	52.8793	30.0661	39.0384	0.707168	up	1.16711	up	--	--
gene_Bol005431	gene_Bol005431	--	1.95434	3.17668	3.13336	36.9268	47.5104	29.0541	41.8048	46.4111	62.2456	3.47224	up	0.879666	up	K13717|5.1e-15|rcu:8289480|K13717 OTU domain-containing protein 3 [EC:3.4.19.12] | (RefSeq) OTU domain-containing protein 3 isoform X1	--
gene_Bol005435	gene_Bol005435	LOC106327878	141.641	110.445	159.832	352.79	386.673	238.162	429.569	483.575	436.86	0.95261	up	0.886336	up	--	--
gene_Bol005449	gene_Bol005449	LOC106327733	82.2212	53.5196	83.8009	174.815	138.444	102.351	286.722	250.302	771.557	0.625262	up	2.23185	up	K16280|8.4e-58|csat:104750588|K16280 E3 ubiquitin-protein ligase RGLG [EC:2.3.2.27] | (RefSeq) E3 ubiquitin-protein ligase RGLG2-like isoform X1	--
gene_Bol005479	gene_Bol005479	--	11.1523	10.0958	14.2123	42.0888	43.3782	39.1856	96.9989	72.2853	183.218	1.51207	up	2.03828	up	K14674|0.0e+00|bna:106377451|K14674 TAG lipase / steryl ester hydrolase / phospholipase A2 / LPA acyltransferase [EC:3.1.1.3 3.1.1.13 3.1.1.4 2.3.1.51] | (RefSeq) triacylglycerol lipase SDP1-like	Steroid biosynthesis (ko00100);; Glycerolipid metabolism (ko00561);; Glycerophospholipid metabolism (ko00564);; Ether lipid metabolism (ko00565);; Arachidonic acid metabolism (ko00590);; Linoleic acid metabolism (ko00591);; alpha-Linolenic acid metabolism (ko00592)
gene_Bol005510	gene_Bol005510	LOC106313235	1.87249	0.681799	2.83487	59.9352	102.075	41.9606	91.302	66.8651	188.676	4.9342	up	1.30834	up	K00430|2.8e-199|bna:106422139|K00430 peroxidase [EC:1.11.1.7] | (RefSeq) peroxidase 37 isoform X1	Phenylpropanoid biosynthesis (ko00940)
gene_Bol005526	gene_Bol005526	--	7.50138	7.53637	7.26534	15.3464	15.3451	12.5468	19.9432	17.3207	15.056	0.65755	up	0.677057	up	K08269|0.0e+00|brp:103857739|K08269 serine/threonine-protein kinase ULK2 [EC:2.7.11.1] | (RefSeq) serine/threonine-protein kinase ATG1c isoform X1	Autophagy - other (ko04136)
gene_Bol005530	gene_Bol005530	LOC106332873	24.0964	39.7432	61.9947	292.64	276.643	225.154	524.893	353.298	528.335	2.34491	up	1.27985	up	--	--
gene_Bol005574	gene_Bol005574	LOC106331809	8.34566	9.2857	7.05737	20.298	25.9097	21.8195	24.239	31.5556	38.5349	1.16411	up	0.941619	up	K08065|8.2e-91|bna:106392627|K08065 nuclear transcription Y subunit beta | (RefSeq) nuclear transcription factor Y subunit B-8	--
gene_Bol005615	gene_Bol005615	LOC106304342	0.596195	0.071926	0.03997	2.13089	2.41956	1.53689	3.49353	4.85194	1.62526	2.79818	up	1.04063	up	K09843|1.1e-270|bna:106379426|K09843 (+)-abscisic acid 8'-hydroxylase [EC:1.14.14.137] | (RefSeq) abscisic acid 8'-hydroxylase 3	Carotenoid biosynthesis (ko00906)
gene_Bol005791	gene_Bol005791	LOC106293171	3.72036	3.83037	4.92006	38.474	36.4132	19.299	77.3379	77.0394	128.25	2.61631	up	2.08261	up	K07761|3.0e-109|thj:104823666|K07761 metalloendoproteinase 5-MMP [EC:3.4.24.-] | (RefSeq) metalloendoproteinase 5-MMP	--
gene_Bol005796	gene_Bol005796	LOC106343371	8.45818	6.06644	5.42683	14.7144	11.5685	12.4016	22.1223	13.5922	15.1742	0.662398	up	0.808208	up	K02184|1.9e-75|ini:109182789|K02184 formin 2 | (RefSeq) formin-like protein 1	--
gene_Bol005894	gene_Bol005894	LOC106295570	15.9796	17.7632	15.9558	45.4389	35.3105	36.5069	64.7113	57.4745	78.1066	0.937622	up	1.23899	up	K00685|0.0e+00|bna:106452540|K00685 arginyl-tRNA---protein transferase [EC:2.3.2.8] | (RefSeq) arginyl-tRNA--protein transferase 2	--
gene_Bol005918	gene_Bol005918	LOC106317320	13.6642	56.9349	58.548	1549.48	1714.27	952.337	1994.62	1938.81	2096.35	4.71455	up	0.950944	up	--	--
gene_Bol005943	gene_Bol005943	--	2.73118	4.12951	4.23005	29.3444	24.6182	21.4726	33.4492	42.0526	29.205	2.45614	up	0.869763	up	K12309|1.3e-99|lja:Lj3g3v0323160.1|K12309 beta-galactosidase [EC:3.2.1.23] | (RefSeq) Lj3g3v0323160.1; -	Galactose metabolism (ko00052);; Other glycan degradation (ko00511);; Glycosaminoglycan degradation (ko00531);; Sphingolipid metabolism (ko00600);; Glycosphingolipid biosynthesis - ganglio series (ko00604)
gene_Bol005947	gene_Bol005947	LOC106342620	46.6196	45.816	35.2623	149.188	132.486	132.816	198.758	149.784	249.109	1.40286	up	1.00949	up	K20359|9.2e-93|boe:106342620|K20359 PRA1 family protein 1 | (RefSeq) PRA1 family protein F3-like	--
gene_Bol005993	gene_Bol005993	--	24.9948	31.0151	21.2999	97.9692	92.3128	62.0601	137.308	103.31	166.655	1.41341	up	1.16472	up	K13416|6.0e-69|boe:106306477|K13416 brassinosteroid insensitive 1-associated receptor kinase 1 [EC:2.7.10.1 2.7.11.1] | (RefSeq) BRASSINOSTEROID INSENSITIVE 1-associated receptor kinase 1-like isoform X1	MAPK signaling pathway - plant (ko04016);; Plant hormone signal transduction (ko04075);; Plant-pathogen interaction (ko04626)
gene_Bol006070	gene_Bol006070	LOC106318759	52.9368	56.7386	55.1807	116.979	115.332	123.397	172.528	144.779	189.146	0.808613	up	0.965899	up	K03347|0.0e+00|bna:106439320|K03347 cullin 1 | (RefSeq) cullin-1	Ubiquitin mediated proteolysis (ko04120);; Protein processing in endoplasmic reticulum (ko04141)
gene_Bol006313	gene_Bol006313	LOC106321081	0.338974	0.621527	0.359973	1.76927	2.23861	1.56653	3.07173	3.67582	2.63665	1.77851	up	1.14078	up	K00924|4.5e-29|dzi:111315285|K00924 kinase [EC:2.7.1.-] | (RefSeq) receptor protein kinase CLAVATA1-like	--
gene_Bol006324	gene_Bol006324	LOC106304616	0.359034	0	0	1.91722	2.35331	1.45278	22.6275	8.56136	86.0473	3.65483	up	4.99131	up	--	--
gene_Bol006350	gene_Bol006350	LOC106304845	0.597492	0.893703	3.2374	14.8955	9.20118	8.50939	20.4621	12.9992	28.9826	2.44565	up	1.44568	up	K12835|1.0e-30|cmax:111493042|K12835 ATP-dependent RNA helicase DDX42 [EC:3.6.4.13] | (RefSeq) DEAD-box ATP-dependent RNA helicase 24 isoform X1	Spliceosome (ko03040)
gene_Bol006381	gene_Bol006381	LOC106304901	0.183838	1.22867	0.343529	36.8621	36.0437	20.82	50.3143	46.3632	96.9621	5.36498	up	1.57019	up	K13448|1.1e-96|boe:106304901|K13448 calcium-binding protein CML | (RefSeq) probable calcium-binding protein CML43	Plant-pathogen interaction (ko04626)
gene_Bol006572	gene_Bol006572	LOC106312126	39.5061	31.2351	67.6583	216.269	233.866	174.647	546.389	442.367	1174.96	1.8696	up	2.34188	up	K03444|1.9e-254|bna:106362332|K03444 MFS transporter, SP family, ERD6-like sugar transporter | (RefSeq) sugar transporter ERD6-like 3	--
gene_Bol006573	gene_Bol006573	LOC106312125	113.171	167.478	160.489	298.936	321.368	194.781	443.671	389.85	358.291	0.585984	up	0.955545	up	K03444|7.4e-278|boe:106312125|K03444 MFS transporter, SP family, ERD6-like sugar transporter | (RefSeq) sugar transporter ERD6	--
gene_Bol006661	gene_Bol006661	LOC106421935	15.9654	15.446	15.0937	45.4335	43.7803	45.9172	41.4021	56.8482	101.217	1.24003	up	1.09399	up	--	--
gene_Bol006711	gene_Bol006711	--	8.70014	10.3808	15.5061	43.7948	37.434	40.1489	54.0606	56.6878	51.9569	1.4995	up	0.846062	up	K07198|4.2e-248|brp:103867962|K07198 5'-AMP-activated protein kinase, catalytic alpha subunit [EC:2.7.11.11] | (RefSeq) CBL-interacting serine/threonine-protein kinase 11	--
gene_Bol006754	gene_Bol006754	LOC103864235	15.0733	11.764	30.3265	88.8438	89.109	93.8808	106.056	100.623	107.275	1.93571	up	0.643811	up	K12386|9.5e-155|bna:106420782|K12386 cystinosin | (RefSeq) cystinosin homolog	--
gene_Bol006778	gene_Bol006778	LOC106445178	10.8776	9.56261	8.64826	22.0204	22.0014	18.2743	27.6116	29.0865	26.7999	0.804621	up	0.843295	up	--	--
gene_Bol006796	gene_Bol006796	--	0.852688	0.305466	0.264297	3.63717	3.00046	2.59653	4.84061	4.21173	6.06399	2.40666	up	1.17969	up	K11699|0.0e+00|bna:106439671|K11699 RNA-dependent RNA polymerase [EC:2.7.7.48] | (RefSeq) RNA-dependent RNA polymerase 2-like	--
gene_Bol006864	gene_Bol006864	LOC106308124	2.93633	3.44422	5.74885	11.0909	9.29443	8.00067	25.5577	19.9524	28.0977	0.917108	up	1.83161	up	K02734|3.8e-111|boe:106308124|K02734 20S proteasome subunit beta 4 [EC:3.4.25.1] | (RefSeq) proteasome subunit beta type-2-A-like	Proteasome (ko03050)
gene_Bol006932	gene_Bol006932	LOC106342898	1.40871	0.819062	0.545297	5.1733	4.79086	4.25553	5.10989	7.85759	6.82136	2.06065	up	0.908709	up	K00006|5.5e-267|boe:106342898|K00006 glycerol-3-phosphate dehydrogenase (NAD+) [EC:1.1.1.8] | (RefSeq) glycerol-3-phosphate dehydrogenase [NAD(+)] GPDHC1, cytosolic	Glycerophospholipid metabolism (ko00564)
gene_Bol006979	gene_Bol006979	LOC106366593	2.3022	1.79762	2.18352	5.55884	6.14668	5.47326	8.38804	6.52827	9.4767	1.14963	up	0.961925	up	K14411|1.6e-197|bna:106366593|K14411 RNA-binding protein Musashi | (RefSeq) RNA-binding protein 1	mRNA surveillance pathway (ko03015)
gene_Bol007057	gene_Bol007057	--	1.58062	5.0723	0.83967	79.9429	65.1545	79.2296	262.821	177.728	303.408	4.57636	up	2.20792	up	K08341|2.5e-62|bna:106353216|K08341 GABA(A) receptor-associated protein | (RefSeq) autophagy-related protein 8e-like	Autophagy - other (ko04136)
gene_Bol007107	gene_Bol007107	--	0.626115	0.418459	1.01341	4.48555	3.34962	5.51906	8.29425	10.0274	5.72416	2.36093	up	1.22847	up	K21752|4.2e-131|bna:106425747|K21752 Dr1-associated corepressor | (RefSeq) dr1-associated corepressor-like	--
gene_Bol007115	gene_Bol007115	LOC106322652	26.7123	23.5601	28.1352	73.845	68.0285	36.4627	178.326	116.121	275.914	0.892208	up	2.19297	up	--	--
gene_Bol007122	gene_Bol007122	LOC106326025	0	0.757644	0.637885	12.7047	14.8902	3.19583	46.1916	14.1976	27.5395	4.09945	up	1.92078	up	--	--
gene_Bol007153	gene_Bol007153	--	3.81094	4.11236	6.31286	83.2602	72.1074	77.9548	136.137	110.607	149.475	3.72389	up	1.22299	up	K16818|2.1e-09|jre:109015008|K16818 phospholipase A1 [EC:3.1.1.32] | (RefSeq) phospholipase A(1) DAD1, chloroplastic-like	Glycerophospholipid metabolism (ko00564);; alpha-Linolenic acid metabolism (ko00592)
gene_Bol007185	gene_Bol007185	LOC106303580	15.3011	12.4239	18.751	66.2946	58.2255	43.8078	92.7079	72.0017	105.928	1.55641	up	1.14969	up	--	--
gene_Bol007220	gene_Bol007220	LOC103875446	17.6828	22.6729	15.5751	35.1787	34.3234	36.9603	57.1395	31.8586	66.1038	0.629062	up	1.03045	up	K09595|5.7e-189|boe:106306351|K09595 minor histocompatibility antigen H13 [EC:3.4.23.-] | (RefSeq) signal peptide peptidase	--
gene_Bol007233	gene_Bol007233	LOC106410410	0.568186	0.517972	0.817307	46.1738	37.4639	24.1639	72.3105	64.6447	106.683	5.50078	up	1.66744	up	K18134|1.9e-126|jcu:105630953|K18134 EGF domain-specific O-GlcNAc transferase [EC:2.4.1.255] | (RefSeq) protein O-linked-mannose beta-1,4-N-acetylglucosaminyltransferase 2	Other types of O-glycan biosynthesis (ko00514)
gene_Bol007568	gene_Bol007568	--	4.90432	3.82661	6.17114	12.8687	11.805	12.4601	13.4875	17.14	19.1439	1.00081	up	0.876793	up	K13412|6.5e-21|aly:9303883|K13412 calcium-dependent protein kinase [EC:2.7.11.1] | (RefSeq) calcium-dependent protein kinase 15	Plant-pathogen interaction (ko04626)
gene_Bol007598	gene_Bol007598	LOC106410641	25.8295	25.4608	22.2386	67.3322	54.7997	61.1093	79.8163	76.8917	59.3965	1.01825	up	0.634914	up	K13523|5.0e-221|bna:106410641|K13523 lysophosphatidic acid acyltransferase / lysophosphatidylinositol acyltransferase [EC:2.3.1.51 2.3.1.-] | (RefSeq) 1-acyl-sn-glycerol-3-phosphate acyltransferase 2	Glycerolipid metabolism (ko00561);; Glycerophospholipid metabolism (ko00564)
gene_Bol007602	gene_Bol007602	LOC106292637	5.41495	4.93082	6.6757	23.6357	27.3772	27.543	31.083	29.2795	29.3872	1.90399	up	0.617563	up	K00898|3.0e-212|bna:106397540|K00898 pyruvate dehydrogenase kinase 2/3/4 [EC:2.7.11.2] | (RefSeq) pyruvate dehydrogenase (acetyl-transferring) kinase, mitochondrial	--
gene_Bol007610	gene_Bol007610	--	5.71417	2.82164	3.88574	109.764	104.064	82.178	210.459	165.48	241.999	4.28555	up	1.52659	up	K18674|3.4e-283|bna:106401687|K18674 N-acetylgalactosamine kinase [EC:2.7.1.157] | (RefSeq) galactokinase	--
gene_Bol007611	gene_Bol007611	LOC106397395	2.51786	4.12418	3.85896	14.9383	14.2423	11.1573	19.2341	17.5108	14.2858	1.59889	up	0.734421	up	--	--
gene_Bol007616	gene_Bol007616	LOC106292855	25.3343	34.4136	30.2411	59.7031	65.6164	53.7635	73.9408	60.0728	90.1123	0.692055	up	0.792977	up	K12736|2.1e-17|csl:COCSUDRAFT_26420|K12736 peptidylprolyl isomerase domain and WD repeat-containing protein 1 [EC:5.2.1.8] | (RefSeq) hypothetical protein	--
gene_Bol007626	gene_Bol007626	LOC106295467	32.4952	17.7384	21.2863	128.762	114.802	158.732	222.01	163.189	235.575	2.19867	up	1.08842	up	K00249|0.0e+00|boe:106295467|K00249 acyl-CoA dehydrogenase [EC:1.3.8.7] | (RefSeq) probable acyl-CoA dehydrogenase IBR3 isoform X1	Fatty acid degradation (ko00071);; Valine, leucine and isoleucine degradation (ko00280);; Fatty acid metabolism (ko01212)
gene_Bol007628	gene_Bol007628	LOC106295945	8.17064	8.94134	7.87065	121.071	116.388	123.409	187.168	228.429	217.884	3.55184	up	1.24948	up	K10527|0.0e+00|boe:106295945|K10527 enoyl-CoA hydratase/3-hydroxyacyl-CoA dehydrogenase [EC:4.2.1.17 1.1.1.35 1.1.1.211] | (RefSeq) glyoxysomal fatty acid beta-oxidation multifunctional protein MFP-a-like	Fatty acid degradation (ko00071);; alpha-Linolenic acid metabolism (ko00592);; Fatty acid metabolism (ko01212)
gene_Bol007700	gene_Bol007700	LOC106294304	6.17142	4.90979	4.6492	11.7285	10.2658	10.8239	16.5356	14.4156	13.4581	0.76605	up	0.848715	up	K11314|2.5e-312|boe:106294304|K11314 transcriptional adapter 2-alpha | (RefSeq) transcriptional adapter ADA2a	--
gene_Bol007705	gene_Bol007705	--	0.289284	0.054666	0.074668	4.24244	3.45459	1.7569	4.4291	5.65302	3.57665	4.01738	up	0.912148	up	--	--
gene_Bol007750	gene_Bol007750	LOC106312972	1.04536	1.05398	1.09131	49.5169	43.4904	33.8802	153.726	103.48	238.197	5.01568	up	2.48168	up	--	--
gene_Bol007889	gene_Bol007889	LOC106409024	3.85965	2.59236	3.96377	29.4051	22.4059	16.554	50.5518	38.7776	40.8673	2.41371	up	1.34809	up	K09286|6.9e-165|bna:106409024|K09286 EREBP-like factor | (RefSeq) ethylene-responsive transcription factor 5	--
gene_Bol007926	gene_Bol007926	LOC106306845	18.5579	21.2531	27.2442	111.255	104.286	91.7218	162.088	122.163	167.033	1.89095	up	1.00737	up	K02433|2.8e-18|apro:F751_6020|K02433 aspartyl-tRNA(Asn)/glutamyl-tRNA(Gln) amidotransferase subunit A [EC:6.3.5.6 6.3.5.7] | (RefSeq) Glutamyl-tRNA(Gln) amidotransferase subunit A	Aminoacyl-tRNA biosynthesis (ko00970)
gene_Bol007927	gene_Bol007927	--	1.8679	3.11792	4.2809	19.1556	12.8096	17.2488	44.6638	20.6441	71.5273	2.08708	up	2.01921	up	--	--
gene_Bol007998	gene_Bol007998	--	1.46949	0.48626	0.466096	9.88859	6.09402	9.53528	15.957	14.385	23.1148	3.05923	up	1.55901	up	--	--
gene_Bol007999	gene_Bol007999	LOC106308117	54.0997	53.9574	73.6656	110.831	131.459	102.151	344.801	225.354	626.538	0.622027	up	2.33535	up	K09286|1.7e-85|boe:106308117|K09286 EREBP-like factor | (RefSeq) ethylene-responsive transcription factor ERF011	--
gene_Bol008045	gene_Bol008045	BNAC02G43690D	1.36294	2.66013	4.44343	28.8653	28.9165	29.7988	64.3329	87.5619	60.2413	3.04021	up	1.6741	up	--	--
gene_Bol008068	gene_Bol008068	LOC106382945	8.76799	9.83393	26.9645	104.451	83.9426	41.96	165.564	160.568	628.22	2.02379	up	2.66227	up	K01610|0.0e+00|bna:106382945|K01610 phosphoenolpyruvate carboxykinase (ATP) [EC:4.1.1.49] | (RefSeq) phosphoenolpyruvate carboxykinase (ATP)-like	Glycolysis / Gluconeogenesis (ko00010);; Citrate cycle (TCA cycle) (ko00020);; Pyruvate metabolism (ko00620);; Carbon fixation in photosynthetic organisms (ko00710);; Carbon metabolism (ko01200)
gene_Bol008182	gene_Bol008182	LOC106333359	0	0.260869	0	1.99875	1.76774	1.67172	2.84814	3.59862	1.42126	3.99258	up	0.875177	up	K06689|1.4e-48|aly:9315484|K06689 ubiquitin-conjugating enzyme E2 D [EC:2.3.2.23] | (RefSeq) ubiquitin-conjugating enzyme E2 11	Ubiquitin mediated proteolysis (ko04120);; Protein processing in endoplasmic reticulum (ko04141)
gene_Bol008187	gene_Bol008187	LOC106335341	5.15888	8.33438	7.59517	22.5735	20.9459	17.8624	51.2381	48.6433	67.4801	1.23593	up	1.91846	up	K03032|0.0e+00|bna:106387997|K03032 26S proteasome regulatory subunit N2 | (RefSeq) 26S proteasome non-ATPase regulatory subunit 1 homolog A	Proteasome (ko03050)
gene_Bol008224	gene_Bol008224	--	0.068594	0.140444	0.403902	5.99118	4.84859	6.15229	23.293	38.9715	7.48483	4.45426	up	2.32521	up	K13691|5.3e-121|nto:104120845|K13691 pathogen-inducible salicylic acid glucosyltransferase [EC:2.4.1.-] | (RefSeq) UDP-glycosyltransferase 74G1-like	--
gene_Bol008273	gene_Bol008273	--	2.09049	4.28274	5.80074	19.36	15.936	18.3419	25.1523	19.442	26.2106	1.81724	up	0.854478	up	K23544|1.3e-06|gab:108451296|K23544 serine incorporator 1/3 | (RefSeq) uncharacterized protein LOC108451296	--
gene_Bol008360	gene_Bol008360	LOC106337286	53.1137	70.5639	82.1177	176.29	165.494	182.4	223.438	214.545	232.788	1.0403	up	0.795657	up	K11252|1.1e-64|bna:106406561|K11252 histone H2B | (RefSeq) histone H2B.3	--
gene_Bol008421	gene_Bol008421	LOC111205691	6.10455	25.5527	27.0908	122.351	127.165	94.8481	230.926	162.37	312.019	2.2327	up	1.52774	up	K22804|1.0e-62|bna:106442438|K22804 structural maintenance of chromosomes protein 6 | (RefSeq) structural maintenance of chromosomes protein 6B-like	--
gene_Bol008424	gene_Bol008424	LOC106385960	4.52821	4.9875	5.97824	15.307	17.0904	12.1579	40.5033	38.1057	17.3665	1.22145	up	1.44096	up	--	--
gene_Bol008435	gene_Bol008435	--	18.4579	7.39494	8.88147	32.4138	19.866	27.5376	45.5241	35.1045	35.5371	0.912905	up	0.961257	up	--	--
gene_Bol008436	gene_Bol008436	LOC106335335	34.9616	39.2233	32.1597	125.239	120.203	102.623	174.38	168.448	119.308	1.41404	up	0.793195	up	K01634|0.0e+00|boe:106335335|K01634 sphinganine-1-phosphate aldolase [EC:4.1.2.27] | (RefSeq) sphingosine-1-phosphate lyase	Sphingolipid metabolism (ko00600)
gene_Bol008554	gene_Bol008554	LOC106335052	10.6271	8.60768	10.0549	43.6869	33.6969	24.1802	57.516	57.2718	80.6606	1.49832	up	1.42176	up	--	--
gene_Bol008566	gene_Bol008566	LOC106332949	5.06769	7.10862	7.70759	37.9333	47.9061	35.5046	83.1321	53.6895	120.72	2.3019	up	1.59155	up	--	--
gene_Bol008667	gene_Bol008667	LOC106307980	1.20212	1.11279	2.67775	4.86361	3.8048	6.01777	6.41862	7.03441	5.3506	1.22066	up	0.757576	up	--	--
gene_Bol008681	gene_Bol008681	LOC106311744	31.3696	54.2413	81.1628	206.553	217.903	201.787	322.538	232.826	372.636	1.59414	up	1.03886	up	K16055|0.0e+00|boe:106311744|K16055 trehalose 6-phosphate synthase/phosphatase [EC:2.4.1.15 3.1.3.12] | (RefSeq) probable alpha,alpha-trehalose-phosphate synthase [UDP-forming] 9	Starch and sucrose metabolism (ko00500)
gene_Bol008703	gene_Bol008703	--	0.619337	0.692937	3.6114	192.617	248.726	68.8469	287.34	119.136	1275.65	6.35928	up	2.37814	up	--	--
gene_Bol008709	gene_Bol008709	--	55.9482	49.8142	49.3249	98.2621	101.471	111.467	119.833	128.353	112.568	0.707329	up	0.631329	up	--	--
gene_Bol008711	gene_Bol008711	LOC106307784	0	0.967539	0.568701	5.056	4.4905	5.40822	11.4827	9.81679	6.28506	2.89532	up	1.25039	up	K00924|2.1e-57|csat:104716570|K00924 kinase [EC:2.7.1.-] | (RefSeq) probable serine/threonine-protein kinase Cx32, chloroplastic	--
gene_Bol009156	gene_Bol009156	LOC106337035	1.95765	0.798039	0.423826	6.75269	5.39083	6.70086	18.6134	10.591	21.635	2.24412	up	1.91486	up	--	--
gene_Bol009214	gene_Bol009214	LOC106334898	17.7705	18.0868	24.6055	98.5873	89.6518	67.0133	152.585	154.339	238.066	1.77575	up	1.58475	up	K13418|2.8e-138|dct:110114305|K13418 somatic embryogenesis receptor kinase 1 [EC:2.7.10.1 2.7.11.1] | (RefSeq) LRR receptor kinase BAK1 isoform X1	--
gene_Bol009216	gene_Bol009216	LOC106334901	15.1781	14.2269	10.3723	28.0169	27.9513	29.1085	43.6891	33.8716	46.0983	0.802549	up	0.9931	up	K14396|4.5e-118|bna:106426920|K14396 polyadenylate-binding protein 2 | (RefSeq) polyadenylate-binding protein 2-like	mRNA surveillance pathway (ko03015)
gene_Bol009241	gene_Bol009241	LOC106416632	0.195231	0.378711	0.445433	2.89894	2.33547	2.66334	6.10096	3.03841	10.1729	2.62963	up	1.83383	up	K17609|2.0e-30|cic:CICLE_v10010213mg|K17609 nucleoredoxin [EC:1.8.1.8] | (RefSeq) hypothetical protein	--
gene_Bol009357	gene_Bol009357	LOC106305426	0.568439	0.971143	0.988934	11.7528	10.5833	7.84469	66.5641	27.8762	135.242	3.25858	up	3.50197	up	K08235|3.8e-143|boe:106305426|K08235 xyloglucan:xyloglucosyl transferase [EC:2.4.1.207] | (RefSeq) probable xyloglucan endotransglucosylase/hydrolase protein 29	--
gene_Bol009551	gene_Bol009551	--	1.5497	3.10083	3.06425	5.09412	12.6221	6.17574	22.2835	19.126	32.8274	1.32113	up	2.11366	up	K01510|1.3e-32|peq:110028934|K01510 apyrase [EC:3.6.1.5] | (RefSeq) probable apyrase 6 isoform X1	Purine metabolism (ko00230);; Pyrimidine metabolism (ko00240)
gene_Bol009564	gene_Bol009564	LOC106309330	10.636	22.0547	41.1255	96.6491	100.636	81.2202	159.091	117.269	125.446	1.59676	up	0.945776	up	--	--
gene_Bol009591	gene_Bol009591	LOC106376003	0.078816	0.147547	0.512138	7.78407	3.29756	7.5756	12.8889	8.8126	11.4242	4.29944	up	1.27638	up	K10999|7.9e-61|nau:109208809|K10999 cellulose synthase A [EC:2.4.1.12] | (RefSeq) cellulose synthase A catalytic subunit 2 [UDP-forming]-like	--
gene_Bol009597	gene_Bol009597	LOC106306971	24.3472	19.7133	73.6888	103.636	111.497	145.965	118.361	176.766	200.405	1.29341	up	0.93088	up	K01784|6.1e-202|bna:106441598|K01784 UDP-glucose 4-epimerase [EC:5.1.3.2] | (RefSeq) UDP-glucose 4-epimerase 2	Galactose metabolism (ko00052);; Amino sugar and nucleotide sugar metabolism (ko00520)
gene_Bol009616	gene_Bol009616	LOC106303789	0.339472	1.16787	6.68143	54.8812	38.2827	43.3188	193.916	97.5758	775.193	3.71429	up	3.62013	up	--	--
gene_Bol009686	gene_Bol009686	--	0	0	0	1.83303	0.836972	1.24065	5.6765	3.99205	4.07023	8.11729	up	2.218	up	K09580|1.8e-287|bna:106399787|K09580 protein disulfide-isomerase A1 [EC:5.3.4.1] | (RefSeq) protein disulfide isomerase-like 1-1	Protein processing in endoplasmic reticulum (ko04141)
gene_Bol009727	gene_Bol009727	LOC106311614	19.6145	24.3453	16.0911	41.8731	49.2037	40.0082	70.8689	67.9339	90.7063	0.831577	up	1.27307	up	K11498|4.7e-10|aly:9316445|K11498 centromeric protein E | (RefSeq) kinesin-like protein KIN-7M, chloroplastic isoform X1	--
gene_Bol009729	gene_Bol009729	LOC106311169	3.41397	3.11107	2.61257	12.7985	10.5444	6.51655	23.1534	12.0442	32.1963	1.41723	up	1.68832	up	K13430|9.0e-56|cann:107847575|K13430 serine/threonine-protein kinase PBS1 [EC:2.7.11.1] | (RefSeq) serine/threonine-protein kinase PBS1	Plant-pathogen interaction (ko04626)
gene_Bol009764	gene_Bol009764	LOC106311845	12.0099	6.29584	13.5069	32.6282	31.5747	34.1191	40.169	44.9546	36.4584	1.3272	up	0.711406	up	K10357|2.3e-28|boe:106311845|K10357 myosin V | (RefSeq) myosin-5 isoform X1	--
gene_Bol009765	gene_Bol009765	LOC108812610	8.38652	7.39156	10.5613	24.9877	23.913	21.034	34.3538	39.3568	31.1119	1.10728	up	0.991393	up	K10357|0.0e+00|boe:106311845|K10357 myosin V | (RefSeq) myosin-5 isoform X1	--
gene_Bol009789	gene_Bol009789	LOC106310328	3.88374	2.0488	5.46116	27.267	27.5296	18.6185	41.8325	29.99	121.764	2.3793	up	1.99351	up	K00799|7.1e-62|bna:106411627|K00799 glutathione S-transferase [EC:2.5.1.18] | (RefSeq) glutathione S-transferase U25 isoform X1	Glutathione metabolism (ko00480)
gene_Bol009813	gene_Bol009813	LOC106310457	1.2334	1.26667	2.29543	21.4291	13.5648	10.0653	27.2208	23.3083	42.9485	2.90088	up	1.55568	up	K13416|8.3e-06|aip:107631617|K13416 brassinosteroid insensitive 1-associated receptor kinase 1 [EC:2.7.10.1 2.7.11.1] | (RefSeq) BRASSINOSTEROID INSENSITIVE 1-associated receptor kinase 1 isoform X1	MAPK signaling pathway - plant (ko04016);; Plant hormone signal transduction (ko04075);; Plant-pathogen interaction (ko04626)
gene_Bol009834	gene_Bol009834	LOC106311697	15.725	11.702	9.37204	26.0698	24.2028	27.1521	28.9434	29.5805	28.0676	0.781763	up	0.585492	up	K08503|7.8e-121|boe:106311697|K08503 syntaxin of plants SYP5 | (RefSeq) syntaxin-51	SNARE interactions in vesicular transport (ko04130)
gene_Bol009836	gene_Bol009836	LOC106307283	44.9617	57.8279	52.4246	121.015	109.022	106.128	178.62	145.267	158.495	0.812752	up	0.949775	up	K23544|4.3e-239|bna:106415867|K23544 serine incorporator 1/3 | (RefSeq) probable serine incorporator	--
gene_Bol009848	gene_Bol009848	LOC106414893	1.63643	1.49539	1.15519	5.24559	5.5827	4.27453	10.5484	7.18203	4.38781	1.50343	up	0.89808	up	--	--
gene_Bol009857	gene_Bol009857	--	5.04454	3.53639	3.40177	14.0642	14.2854	9.69157	28.0303	18.784	9.97294	1.37643	up	0.911277	up	K14709|1.4e-21|gra:105775689|K14709 solute carrier family 39 (zinc transporter), member 1/2/3 | (RefSeq) uncharacterized LOC105775689	--
gene_Bol009955	gene_Bol009955	LOC106339788	2.54101	8.53999	3.8517	247.48	265.361	123.346	784.196	338.836	584	5.11088	up	1.85643	up	K00511|6.7e-298|boe:106339788|K00511 squalene monooxygenase [EC:1.14.14.17] | (RefSeq) squalene monooxygenase 1,1-like	Steroid biosynthesis (ko00100);; Sesquiterpenoid and triterpenoid biosynthesis (ko00909)
gene_Bol009996	gene_Bol009996	--	4.23523	2.80293	6.36766	41.543	37.643	39.3924	53.2267	48.3198	58.1846	2.83834	up	0.87915	up	K13343|8.6e-08|apro:F751_0427|K13343 peroxin-14 | (RefSeq) Peroxisomal membrane protein PEX14	Peroxisome (ko04146)
gene_Bol009997	gene_Bol009997	LOC106318339	8.50217	8.18308	7.31276	17.4443	17.0394	14.5324	18.0099	19.8718	18.4965	0.735483	up	0.627752	up	K11446|6.6e-21|ppp:112274409|K11446 [histone H3]-trimethyl-L-lysine4 demethylase [EC:1.14.11.67] | (RefSeq) putative lysine-specific demethylase JMJ16 isoform X1	--
gene_Bol010012	gene_Bol010012	LOC106318006	25.3287	40.9389	51.4386	107.869	110.439	102.814	153.855	123.074	169.248	1.1371	up	0.93278	up	K14674|0.0e+00|boe:106318006|K14674 TAG lipase / steryl ester hydrolase / phospholipase A2 / LPA acyltransferase [EC:3.1.1.3 3.1.1.13 3.1.1.4 2.3.1.51] | (RefSeq) triacylglycerol lipase SDP1	Steroid biosynthesis (ko00100);; Glycerolipid metabolism (ko00561);; Glycerophospholipid metabolism (ko00564);; Ether lipid metabolism (ko00565);; Arachidonic acid metabolism (ko00590);; Linoleic acid metabolism (ko00591);; alpha-Linolenic acid metabolism (ko00592)
gene_Bol010204	gene_Bol010204	--	2.20523	0.906598	0.804133	9.95706	8.58775	5.16648	26.525	18.2822	23.2835	2.31048	up	1.95419	up	K07893|5.3e-21|ini:109192111|K07893 Ras-related protein Rab-6A | (RefSeq) ras-related protein RABH1b-like	--
gene_Bol010229	gene_Bol010229	LOC106372548	14.3735	14.3892	11.3951	25.0305	24.4364	27.4478	35.8565	30.7179	36.6632	0.640535	up	0.869984	up	K12616|0.0e+00|ath:AT3G13300|K12616 enhancer of mRNA-decapping protein 4 | (RefSeq) VCS; Transducin/WD40 repeat-like superfamily protein	RNA degradation (ko03018)
gene_Bol010245	gene_Bol010245	LOC106296085	6.00228	7.60141	7.4898	26.5285	22.4397	22.4674	30.838	32.6755	23.0053	1.45452	up	0.666601	up	K06189|1.8e-16|ghi:107943677|K06189 magnesium and cobalt transporter | (RefSeq) magnesium and cobalt efflux protein CorC-like	--
gene_Bol010251	gene_Bol010251	LOC106293262	0.883142	0.522837	0.253683	5.96153	6.42433	5.42967	17.0302	5.52756	10.7673	3.08515	up	1.3244	up	K00521|1.5e-33|cmos:111447866|K00521 ferric-chelate reductase [EC:1.16.1.7] | (RefSeq) ferric reduction oxidase 7, chloroplastic-like	--
gene_Bol010366	gene_Bol010366	LOC106343997	2.16536	5.15417	1.43933	50.3906	49.2076	49.8629	93.4151	53.0647	94.6687	3.78099	up	1.15689	up	K19891|9.2e-14|ppp:112294008|K19891 glucan endo-1,3-beta-glucosidase 1/2/3 [EC:3.2.1.39] | (RefSeq) glucan endo-1,3-beta-glucosidase 3-like	Starch and sucrose metabolism (ko00500)
gene_Bol010425	gene_Bol010425	LOC106397370	1.30559	1.19777	5.6141	106.095	108.077	42.5181	390.137	113.31	175.661	4.66211	up	1.78572	up	K22324|3.8e-183|brp:103843151|K22324 aliphatic glucosinolate S-oxygenase [EC:1.14.13.237] | (RefSeq) flavin-containing monooxygenase FMO GS-OX5	--
gene_Bol010427	gene_Bol010427	LOC106400975	51.4733	48.0257	88.8258	182.872	184.111	165.813	377.181	306.952	895.72	1.19276	up	2.13301	up	K01193|0.0e+00|bna:106400975|K01193 beta-fructofuranosidase [EC:3.2.1.26] | (RefSeq) acid beta-fructofuranosidase 4, vacuolar	Galactose metabolism (ko00052);; Starch and sucrose metabolism (ko00500)
gene_Bol010492	gene_Bol010492	--	0.030486	0	0	7.82687	7.91719	5.26061	35.591	7.41646	10.8475	6.47523	up	1.68961	up	--	--
gene_Bol010629	gene_Bol010629	--	29.0359	18.5125	33.582	219.362	212.485	198.926	326.317	352.455	179.175	2.65883	up	0.797452	up	K11147|3.3e-136|bna:106383089|K11147 dehydrogenase/reductase SDR family member 4 [EC:1.1.-.-] | (RefSeq) short-chain dehydrogenase/reductase SDRA-like	Peroxisome (ko04146)
gene_Bol010695	gene_Bol010695	--	4.911	5.82488	4.21576	15.1845	12.7252	12.4728	28.2842	19.8693	40.8176	1.13441	up	1.6443	up	K08819|1.3e-158|brp:103870946|K08819 cyclin-dependent kinase 12/13 [EC:2.7.11.22 2.7.11.23] | (RefSeq) WRKY58; probable WRKY transcription factor 58	--
gene_Bol010697	gene_Bol010697	LOC106388649	0.873686	0.667407	0.435673	17.0784	12.8113	10.5439	28.9207	19.689	9.06271	4.04059	up	0.835513	up	K23544|3.5e-181|brp:103842861|K23544 serine incorporator 1/3 | (RefSeq) serine incorporator 3	--
gene_Bol010709	gene_Bol010709	--	61.1848	56.1068	58.6462	116.098	116.701	123.774	161.706	126.108	120.38	0.72053	up	0.603727	up	K15040|6.0e-152|bna:106388659|K15040 voltage-dependent anion channel protein 2 | (RefSeq) mitochondrial outer membrane protein porin 1	--
gene_Bol010710	gene_Bol010710	LOC106438906	54.7136	79.9125	68.7832	702.442	659.723	551.607	1651.74	951.599	1671.01	2.93138	up	1.62491	up	--	--
gene_Bol010790	gene_Bol010790	--	5.07641	5.13817	5.61338	10.8443	11.2541	10.8959	15.7886	13.8899	16.9408	0.757398	up	0.944206	up	K20028|1.5e-161|bna:106388766|K20028 palmitoyltransferase ZDHHC2/15/20 [EC:2.3.1.225] | (RefSeq) probable protein S-acyltransferase 12	--
gene_Bol010872	gene_Bol010872	--	7.94427	11.3063	10.4149	42.7842	33.7518	42.0205	46.1539	53.591	42.936	1.6891	up	0.680524	up	K08334|3.6e-299|boe:106297182|K08334 beclin | (RefSeq) beclin-1-like protein isoform X1	Autophagy - other (ko04136)
gene_Bol010942	gene_Bol010942	LOC106333012	0.544894	1.85432	1.10459	32.7978	31.2475	11.6677	95.2244	69.0073	244	4.10443	up	3.00502	up	--	--
gene_Bol010967	gene_Bol010967	LOC106389085	2.08568	2.5895	3.1381	6.05154	5.32946	4.72208	7.88009	5.24288	7.78883	0.738168	up	0.827437	up	K00521|4.4e-08|cmos:111447866|K00521 ferric-chelate reductase [EC:1.16.1.7] | (RefSeq) ferric reduction oxidase 7, chloroplastic-like	--
gene_Bol011103	gene_Bol011103	LOC106292654	4.08273	4.81478	3.83525	10.4519	9.21835	11.3191	11.684	11.0914	14.1962	0.979392	up	0.715663	up	K19937|2.0e-261|bna:106397514|K19937 Rab3 GTPase-activating protein non-catalytic subunit | (RefSeq) rab3 GTPase-activating protein non-catalytic subunit	--
gene_Bol011116	gene_Bol011116	LOC106293007	0.384381	0.610175	0.46203	5.39932	3.90907	3.76214	12.5347	9.04963	13.0952	2.75095	up	1.8652	up	--	--
gene_Bol011119	gene_Bol011119	LOC106292889	1.15504	0.926465	1.91676	5.8587	5.40959	4.58628	6.98127	6.90208	6.53357	1.66725	up	0.78335	up	K23164|5.7e-203|boe:106292889|K23164 reticulon-4-interacting protein 1, mitochondrial | (RefSeq) reticulon-4-interacting protein 1, mitochondrial	--
gene_Bol011164	gene_Bol011164	LOC106397412	41.266	21.9891	16.7486	179.508	164.445	125.839	349.432	322.59	607.014	2.27577	up	1.9573	up	K00521|3.8e-44|cmos:111447866|K00521 ferric-chelate reductase [EC:1.16.1.7] | (RefSeq) ferric reduction oxidase 7, chloroplastic-like	--
gene_Bol011167	gene_Bol011167	LOC111206569	2.12987	1.56578	1.86244	22.1124	25.0736	15.9759	27.3775	29.7429	17.3994	3.20927	up	0.604064	up	K00521|7.2e-41|cmos:111447866|K00521 ferric-chelate reductase [EC:1.16.1.7] | (RefSeq) ferric reduction oxidase 7, chloroplastic-like	--
gene_Bol011217	gene_Bol011217	LOC106293195	1.15085	2.29549	3.39404	59.7756	57.0895	33.802	386.376	240.708	963.675	4.14728	up	3.98337	up	K13051|1.2e-183|bna:106397932|K13051 L-asparaginase / beta-aspartyl-peptidase [EC:3.5.1.1 3.4.19.5] | (RefSeq) probable isoaspartyl peptidase/L-asparaginase 2	Alanine, aspartate and glutamate metabolism (ko00250);; Cyanoamino acid metabolism (ko00460)
gene_Bol011450	gene_Bol011450	LOC106318777	3.1303	2.38299	3.8894	9.07326	5.44388	6.90557	9.50957	7.72083	9.6174	0.875834	up	0.773801	up	K20028|1.3e-160|boe:106318777|K20028 palmitoyltransferase ZDHHC2/15/20 [EC:2.3.1.225] | (RefSeq) probable protein S-acyltransferase 12	--
gene_Bol011466	gene_Bol011466	--	3.36411	3.23879	4.31851	99.6967	94.018	118.045	130.507	146.343	265.933	4.52748	up	1.32433	up	K08237|4.8e-274|brp:103836868|K08237 hydroquinone glucosyltransferase [EC:2.4.1.218] | (RefSeq) UDP-glycosyltransferase 72B1	--
gene_Bol011498	gene_Bol011498	--	2.99916	2.36086	4.19945	55.4886	67.6179	47.216	120.837	84.346	230.724	3.85016	up	1.89657	up	K05765|1.9e-71|bna:106363888|K05765 cofilin | (RefSeq) actin-depolymerizing factor 8	--
gene_Bol011504	gene_Bol011504	LOC106318357	18.0872	18.6404	19.2636	45.3381	39.8007	42.9643	50.6912	59.2027	65.5255	0.892718	up	0.9089	up	K09480|1.2e-272|boe:106318357|K09480 digalactosyldiacylglycerol synthase [EC:2.4.1.241] | (RefSeq) digalactosyldiacylglycerol synthase 2, chloroplastic	Glycerolipid metabolism (ko00561)
gene_Bol011695	gene_Bol011695	LOC106392160	0.909081	0.898856	1.25651	53.6397	61.7569	25.3188	99.0617	81.1657	92.2133	5.2082	up	1.38047	up	K10260|6.5e-14|cre:CHLREDRAFT_205525|K10260 F-box and WD-40 domain protein 7 | (RefSeq) predicted protein	Ubiquitin mediated proteolysis (ko04120)
gene_Bol011719	gene_Bol011719	LOC106337498	7.18478	2.26403	2.34306	33.897	21.6983	23.3141	41.8443	40.6993	25.0417	2.46143	up	0.819516	up	K14432|5.4e-192|boe:106337498|K14432 ABA responsive element binding factor | (RefSeq) protein ABSCISIC ACID-INSENSITIVE 5	Plant hormone signal transduction (ko04075)
gene_Bol011944	gene_Bol011944	--	14.3594	15.6106	28.1249	97.8637	85.1415	78.4801	116.347	135.854	143.619	1.85902	up	1.04663	up	K04718|7.2e-278|boe:106327927|K04718 sphingosine kinase [EC:2.7.1.91] | (RefSeq) sphingosine kinase 2-like isoform X1	Sphingolipid metabolism (ko00600)
gene_Bol012036	gene_Bol012036	LOC103839823	11.5018	14.4485	13.3134	24.1869	26.9084	35.2032	36.6005	33.1046	28.9257	0.831474	up	0.599964	up	K08341|7.8e-52|bna:106346633|K08341 GABA(A) receptor-associated protein | (RefSeq) autophagy-related protein 8a-like	Autophagy - other (ko04136)
gene_Bol012049	gene_Bol012049	--	0.171211	1.68914	1.17686	6.70972	6.51249	8.25032	13.6239	7.22442	45.3835	2.481	up	2.25511	up	--	--
gene_Bol012089	gene_Bol012089	--	0.345575	0	0.606677	2.95014	2.36145	3.99392	4.12019	6.82669	4.3071	2.94756	up	1.11677	up	K03138|4.6e-195|bna:106381585|K03138 transcription initiation factor TFIIF subunit alpha | (RefSeq) transcription initiation factor IIF subunit alpha-like isoform X1	Basal transcription factors (ko03022)
gene_Bol012097	gene_Bol012097	LOC106381580	8.79106	8.14399	7.85393	20.9017	18.0634	20.6986	23.6256	20.0759	23.1891	0.965245	up	0.604868	up	K10591|7.7e-67|bdi:100833092|K10591 E3 ubiquitin-protein ligase NEDD4 [EC:2.3.2.26] | (RefSeq) E3 ubiquitin-protein ligase UPL5	Ubiquitin mediated proteolysis (ko04120);; Endocytosis (ko04144)
gene_Bol012159	gene_Bol012159	BNAC04G31630D	15.9685	13.6035	25.2249	409.958	413.054	372.65	554.138	651.192	388.196	4.14208	up	0.789105	up	--	--
gene_Bol012178	gene_Bol012178	LOC106318384	3.30921	4.71452	8.16344	34.5368	40.1714	28.5085	61.0345	34.1817	49.6134	2.36126	up	0.922118	up	--	--
gene_Bol012243	gene_Bol012243	LOC106318578	1.10186	0.6947	0.363037	2.8434	3.30799	3.57324	4.88241	3.91896	3.83121	1.86289	up	0.780823	up	--	--
gene_Bol012280	gene_Bol012280	--	0.644988	1.96012	1.5675	9.02694	7.89762	5.7318	17.4519	11.822	27.2403	2.11227	up	1.83307	up	--	--
gene_Bol012362	gene_Bol012362	LOC106381699	28.0698	31.341	40.1866	125.621	92.518	73.4572	331.589	235.638	890.384	1.24565	up	2.91154	up	K13420|1.8e-14|gab:108481249|K13420 LRR receptor-like serine/threonine-protein kinase FLS2 [EC:2.7.11.1] | (RefSeq) putative receptor-like protein kinase At3g47110	MAPK signaling pathway - plant (ko04016);; Plant-pathogen interaction (ko04626)
gene_Bol012502	gene_Bol012502	LOC106430944	56.1077	55.0769	63.3105	582.864	484.764	386.502	1252.77	564.079	1046.42	2.75973	up	1.42906	up	--	--
gene_Bol012594	gene_Bol012594	LOC106298812	10.2141	14.2532	9.12924	29.427	22.0201	31.7472	39.8778	36.0424	52.6855	0.999605	up	1.10716	up	K11599|9.4e-77|boe:106298812|K11599 proteasome maturation protein | (RefSeq) cyclin-B1-2-like	Proteasome (ko03050)
gene_Bol012751	gene_Bol012751	LOC106382546	9.12075	7.94387	6.90004	18.5129	16.8417	16.9148	26.7986	20.5139	27.0872	0.830648	up	0.95962	up	K20827|0.0e+00|bna:106382546|K20827 RNA polymerase II-associated protein 2 [EC:3.1.3.16] | (RefSeq) putative RNA polymerase II subunit B1 CTD phosphatase RPAP2 homolog isoform X1	--
gene_Bol012758	gene_Bol012758	LOC111206222	7.09593	4.75822	7.05447	13.6012	12.4648	13.235	85.9585	31.5531	153.272	0.756523	up	3.35033	up	--	--
gene_Bol012783	gene_Bol012783	LOC106325438	0.65743	0.759321	0.494298	63.6536	50.8894	28.5498	78.7461	74.6675	53.8784	5.90249	up	0.918737	up	K10664|7.6e-195|boe:106325438|K10664 E3 ubiquitin-protein ligase ATL6/9/15/31/42/55 [EC:2.3.2.27] | (RefSeq) E3 ubiquitin-protein ligase ATL31-like	--
gene_Bol012795	gene_Bol012795	--	3.62843	2.82043	5.04114	30.4403	27.4807	27.0471	42.2403	47.304	102.18	2.58128	up	1.72044	up	K01176|9.0e-64|sbi:8065370|K01176 alpha-amylase [EC:3.2.1.1] | (RefSeq) alpha-amylase isozyme 2A	Starch and sucrose metabolism (ko00500)
gene_Bol012840	gene_Bol012840	LOC106301434	1.22962	0.685495	0.613313	3.14283	1.77319	1.92541	4.02257	3.80451	3.00724	1.137	up	1.06269	up	K10695|1.8e-206|boe:106301434|K10695 E3 ubiquitin-protein ligase RNF1/2 [EC:2.3.2.27] | (RefSeq) putative E3 ubiquitin-protein ligase RING1a	--
gene_Bol012989	gene_Bol012989	LOC103834668	162.995	139.983	111.411	1064.78	1150.16	386.148	1941.76	1363.22	3040.47	2.36916	up	1.796	up	K22314|5.1e-142|boe:106329223|K22314 glucosinolate gamma-glutamyl hydrolase [EC:3.4.19.16] | (RefSeq) putative glutamine amidotransferase YLR126C	--
gene_Bol013048	gene_Bol013048	LOC106385718	0	0	0.299536	18.663	14.6036	8.05875	127.644	75.3837	38.1241	6.71498	up	2.86484	up	K23717|2.8e-211|gmx:100820533|K23717 solute carrier family 23 (nucleobase transporter), member 2 | (RefSeq) nucleobase-ascorbate transporter 4	--
gene_Bol013052	gene_Bol013052	LOC106327152	4.7266	1.60139	3.54734	22.3484	12.494	15.4047	62.3995	86.625	86.0056	2.05089	up	2.67948	up	K14487|0.0e+00|boe:106327152|K14487 auxin responsive GH3 gene family | (RefSeq) indole-3-acetic acid-amido synthetase GH3.5	Plant hormone signal transduction (ko04075)
gene_Bol013132	gene_Bol013132	LOC106308530	15.8472	40.2512	46.7649	138.451	147.348	93.9033	146.338	218.625	117.337	1.57228	up	0.715741	up	--	--
gene_Bol013135	gene_Bol013135	LOC106308523	6.67495	4.82763	5.78205	20.4904	19.6824	16.5342	48.0705	27.8425	31.2567	1.41626	up	1.32312	up	--	--
gene_Bol013144	gene_Bol013144	LOC106295406	0	0	0.361321	13.5314	11.1166	7.82783	13.4287	19.6346	31.5867	6.20675	up	1.50939	up	K08235|1.6e-109|boe:106295406|K08235 xyloglucan:xyloglucosyl transferase [EC:2.4.1.207] | (RefSeq) probable xyloglucan endotransglucosylase/hydrolase protein 11	--
gene_Bol013146	gene_Bol013146	LOC106295406	0.63942	0.324865	0.396103	20.7975	17.5048	13.8244	15.6466	34.6242	61.2967	4.89819	up	1.65103	up	K08235|5.4e-111|boe:106295406|K08235 xyloglucan:xyloglucosyl transferase [EC:2.4.1.207] | (RefSeq) probable xyloglucan endotransglucosylase/hydrolase protein 11	--
gene_Bol013155	gene_Bol013155	LOC106308149	4.96256	5.4473	5.8711	15.7798	15.8519	10.7507	38.8833	25.7163	92.6904	1.08264	up	2.46599	up	--	--
gene_Bol013178	gene_Bol013178	--	2.3744	1.14299	1.42569	4.57134	2.87933	3.69418	5.29409	4.38089	4.49153	0.871429	up	0.767053	up	--	--
gene_Bol013179	gene_Bol013179	LOC106431858	2.20768	1.61306	1.23613	7.54766	7.30537	7.52205	15.012	12.8568	33.0404	1.85046	up	1.99476	up	--	--
gene_Bol013225	gene_Bol013225	--	9.73645	9.99349	12.6484	24.9717	25.184	33.6952	36.1874	40.2901	28.8968	1.06512	up	0.725248	up	K07976|4.5e-97|crb:17896567|K07976 Rab family, other | (RefSeq) ras-related protein RABA6a	--
gene_Bol013316	gene_Bol013316	LOC106402810	10.3949	7.44691	8.24145	78.2083	73.1927	44.0687	80.4174	87.9033	172.555	2.61477	up	1.33017	up	K00640|9.9e-183|bna:106402810|K00640 serine O-acetyltransferase [EC:2.3.1.30] | (RefSeq) serine acetyltransferase 1, chloroplastic	Cysteine and methionine metabolism (ko00270);; Sulfur metabolism (ko00920);; Carbon metabolism (ko01200);; Biosynthesis of amino acids (ko01230)
gene_Bol013338	gene_Bol013338	LOC106296545	129.095	142.349	122.135	264.297	265.824	197.195	296.966	253.2	274.065	0.590974	up	0.60902	up	--	--
gene_Bol013354	gene_Bol013354	--	11.0692	10.9466	11.3238	21.2141	19.7483	23.2687	25.4793	28.2115	25.1354	0.643978	up	0.716901	up	K03257|8.9e-29|nta:107761684|K03257 translation initiation factor 4A | (RefSeq) eukaryotic initiation factor 4A-9-like	RNA transport (ko03013)
gene_Bol013378	gene_Bol013378	--	54.3006	80.9245	101.251	1301.83	1177.17	1140.55	2204.73	1609.04	2112.67	3.62566	up	1.15748	up	K10691|1.4e-39|ats:109762802|K10691 E3 ubiquitin-protein ligase UBR4 [EC:2.3.2.27] | (RefSeq) LOC109762802; auxin transport protein BIG	--
gene_Bol013498	gene_Bol013498	LOC106391973	1.46305	1.59871	1.21114	18.8034	15.5638	16.7241	30.5193	31.8277	59.9744	3.25884	up	1.78078	up	K18045|7.6e-121|bna:106391973|K18045 tyrosine-protein phosphatase SIW14 [EC:3.1.3.48] | (RefSeq) probable tyrosine-protein phosphatase At1g05000 isoform X2	--
gene_Bol013510	gene_Bol013510	--	0	0	0	2.99848	2.23738	1.35215	18.3275	10.0483	2.38642	8.23571	up	2.48499	up	K03841|1.3e-171|bna:111213425|K03841 fructose-1,6-bisphosphatase I [EC:3.1.3.11] | (RefSeq) fructose-1,6-bisphosphatase, cytosolic-like	Glycolysis / Gluconeogenesis (ko00010);; Pentose phosphate pathway (ko00030);; Fructose and mannose metabolism (ko00051);; Carbon fixation in photosynthetic organisms (ko00710);; Carbon metabolism (ko01200)
gene_Bol013511	gene_Bol013511	--	0.204224	0.139536	0.101876	0.698549	0.539052	0.378908	2.42102	2.43262	6.97555	1.53003	up	3.42859	up	K20924|0.0e+00|boe:106342336|K20924 cellulose synthase-like protein [EC:2.4.1.-] | (RefSeq) cellulose synthase-like protein D1	--
gene_Bol013535	gene_Bol013535	LOC106308848	7.46668	62.4841	15.7716	138.37	144.431	169.26	276.713	246.13	195.153	2.0854	up	1.06239	up	K01369|2.2e-290|boe:106308848|K01369 legumain [EC:3.4.22.34] | (RefSeq) vacuolar-processing enzyme gamma-isozyme	--
gene_Bol013541	gene_Bol013541	LOC106297477	0	0.045817	0	5.86787	5.73415	3.62609	9.86289	9.7837	13.9114	7.86894	up	1.61162	up	K14709|2.0e-214|boe:106297477|K14709 solute carrier family 39 (zinc transporter), member 1/2/3 | (RefSeq) zinc transporter 9	--
gene_Bol013544	gene_Bol013544	LOC106306877	4.61967	3.84219	1.92398	42.9643	57.2292	27.4623	106.03	38.6832	109.846	3.33594	up	1.47919	up	K15015|2.1e-11|aip:107609646|K15015 solute carrier family 32 (vesicular inhibitory amino acid transporter) | (RefSeq) uncharacterized protein LOC107609646 isoform X1	--
gene_Bol013547	gene_Bol013547	LOC106309192	42.2833	50.76	53.295	332.943	330.841	420.587	422.162	459.715	381.996	2.58291	up	0.635136	up	K08776|0.0e+00|boe:106309192|K08776 puromycin-sensitive aminopeptidase [EC:3.4.11.-] | (RefSeq) aminopeptidase M1	--
gene_Bol013557	gene_Bol013557	LOC106310570	59.7316	101.949	214.663	680.056	633.094	654.453	681.336	1319.26	602.157	2.06449	up	0.770738	up	K14157|0.0e+00|boe:106310570|K14157 alpha-aminoadipic semialdehyde synthase [EC:1.5.1.8 1.5.1.9] | (RefSeq) alpha-aminoadipic semialdehyde synthase isoform X1	Lysine degradation (ko00310)
gene_Bol013628	gene_Bol013628	LOC106304266	215.751	273.955	246.474	492.219	539.429	469.8	710.053	657.767	513.849	0.728305	up	0.718646	up	K13126|0.0e+00|boe:106304266|K13126 polyadenylate-binding protein | (RefSeq) polyadenylate-binding protein 2	RNA transport (ko03013);; mRNA surveillance pathway (ko03015);; RNA degradation (ko03018)
gene_Bol013702	gene_Bol013702	LOC106375286	13.8973	22.7793	23.4991	75.0324	78.2324	85.7777	119.525	117.077	67.492	1.68008	up	0.710451	up	K00106|0.0e+00|bna:106375286|K00106 xanthine dehydrogenase/oxidase [EC:1.17.1.4 1.17.3.2] | (RefSeq) xanthine dehydrogenase 1-like isoform X1	Purine metabolism (ko00230);; Caffeine metabolism (ko00232);; Peroxisome (ko04146)
gene_Bol013730	gene_Bol013730	LOC106318047	70.8605	77.9556	72.6607	140.062	160.475	166.109	193.105	186.089	167.916	0.775542	up	0.644016	up	K00030|1.7e-207|bna:106375262|K00030 isocitrate dehydrogenase (NAD+) [EC:1.1.1.41] | (RefSeq) isocitrate dehydrogenase [NAD] regulatory subunit 1, mitochondrial-like	Citrate cycle (TCA cycle) (ko00020);; Carbon metabolism (ko01200);; 2-Oxocarboxylic acid metabolism (ko01210);; Biosynthesis of amino acids (ko01230)
gene_Bol013751	gene_Bol013751	--	8.54407	5.56496	5.76108	44.5426	36.2858	18.516	125.41	99.8474	212.776	2.03533	up	2.65763	up	K08472|0.0e+00|boe:106313096|K08472 mlo protein | (RefSeq) MLO-like protein 6	--
gene_Bol013783	gene_Bol013783	LOC106376873	4.70846	1.6765	2.08875	169.373	103.547	70.7382	340.088	370.012	764.752	5.05568	up	2.64056	up	K05350|7.7e-206|bna:106376873|K05350 beta-glucosidase [EC:3.2.1.21] | (RefSeq) beta-glucosidase 46-like	Cyanoamino acid metabolism (ko00460);; Starch and sucrose metabolism (ko00500);; Phenylpropanoid biosynthesis (ko00940)
gene_Bol014091	gene_Bol014091	BNAC04G12610D	240.886	382.992	448.273	739.497	704.42	713.254	1175.24	913.7	1036.73	0.697982	up	0.966159	up	K07025|2.5e-147|bna:106396658|K07025 putative hydrolase of the HAD superfamily | (RefSeq) BNAC04G12610D; uncharacterized protein C24B11.05	--
gene_Bol014173	gene_Bol014173	--	14.0498	18.1528	17.8648	45.9112	41.8238	43.4342	64.9403	39.8125	64.9217	1.08506	up	0.833425	up	--	--
gene_Bol014175	gene_Bol014175	LOC106444972	23.2378	21.6448	24.5257	180.728	194.881	176.519	411.656	267.675	413.825	2.69389	up	1.44314	up	K13066|7.1e-198|bna:106444972|K13066 caffeic acid 3-O-methyltransferase [EC:2.1.1.68] | (RefSeq) caffeic acid 3-O-methyltransferase 1	Phenylpropanoid biosynthesis (ko00940)
gene_Bol014239	gene_Bol014239	--	4.18095	12.4073	7.70164	137.025	132.085	82.5699	173.375	181.013	131.354	3.548	up	0.855334	up	K00517|4.9e-290|bna:106377533|K00517 indol-3-yl-methylglucosinolate hydroxylase [EC:1.14.-.-] | (RefSeq) cytochrome P450 81F2-like	--
gene_Bol014260	gene_Bol014260	--	3.51642	1.98771	2.38447	10.2367	10.0678	7.58041	18.2308	11.4445	10.3685	1.53151	up	0.906003	up	K16189|1.7e-06|peq:110028745|K16189 phytochrome-interacting factor 4 | (RefSeq) transcription factor PIF4-like isoform X1	Plant hormone signal transduction (ko04075)
gene_Bol014334	gene_Bol014334	LOC106436812	4.7102	5.00331	3.07332	15.6408	13.7141	8.47093	14.7232	16.9775	26.9052	1.27539	up	1.13221	up	K00889|3.8e-290|bna:106436812|K00889 1-phosphatidylinositol-4-phosphate 5-kinase [EC:2.7.1.68] | (RefSeq) phosphatidylinositol 4-phosphate 5-kinase 8-like	Inositol phosphate metabolism (ko00562);; Phosphatidylinositol signaling system (ko04070);; Endocytosis (ko04144)
gene_Bol014379	gene_Bol014379	LOC106319020	19.935	22.7567	21.5602	61.4763	58.6805	62.8792	98.5749	86.8928	117.051	1.20856	up	1.18891	up	K00914|0.0e+00|boe:106319020|K00914 phosphatidylinositol 3-kinase [EC:2.7.1.137] | (RefSeq) phosphatidylinositol 3-kinase VPS34 isoform X1	Inositol phosphate metabolism (ko00562);; Phosphatidylinositol signaling system (ko04070);; Autophagy - other (ko04136);; Phagosome (ko04145)
gene_Bol014383	gene_Bol014383	LOC106322115	0.079303	0.991903	0.163288	20.0121	11.3401	6.22381	54.3807	34.5288	101.116	4.54979	up	2.88334	up	--	--
gene_Bol014387	gene_Bol014387	LOC106395786	0.174088	0.231149	0	7.90646	6.93411	2.9117	33.2189	11.1345	65.6669	4.96996	up	3.20029	up	--	--
gene_Bol014391	gene_Bol014391	LOC106339672	2.82838	2.32519	0.551315	5.03551	4.60023	6.89547	7.52818	7.22267	11.6993	1.23183	up	1.16842	up	--	--
gene_Bol014392	gene_Bol014392	--	30.2436	20.2468	12.9673	1002.64	913.576	588.989	1719.7	1966.09	4497.43	5.0206	up	2.26072	up	--	--
gene_Bol014456	gene_Bol014456	--	4.92633	7.39408	6.84155	20.4794	19.8791	18.9556	25.3603	19.4354	26.0331	1.32433	up	0.707353	up	--	--
gene_Bol014466	gene_Bol014466	LOC106342499	4.14053	3.02995	3.11174	7.94179	5.71052	6.58157	14.3409	10.4624	18.5745	0.678813	up	1.58863	up	K08857|1.6e-294|boe:106342499|K08857 NIMA (never in mitosis gene a)-related kinase 1/4/5 [EC:2.7.11.1] | (RefSeq) serine/threonine-protein kinase Nek4 isoform X1	--
gene_Bol014643	gene_Bol014643	LOC106319092	9.05144	17.5469	15.8303	50.9128	50.9517	37.0971	95.131	65.86	104.784	1.4057	up	1.40059	up	K16818|7.7e-11|jre:109015008|K16818 phospholipase A1 [EC:3.1.1.32] | (RefSeq) phospholipase A(1) DAD1, chloroplastic-like	Glycerophospholipid metabolism (ko00564);; alpha-Linolenic acid metabolism (ko00592)
gene_Bol014681	gene_Bol014681	LOC106313697	22.6614	27.2966	29.8518	65.59	57.3843	61.5028	67.4487	65.009	93.8479	0.903933	up	0.775106	up	--	--
gene_Bol014694	gene_Bol014694	LOC106399626	0.474325	1.36665	0.715341	8.82252	6.30898	4.69236	17.7439	13.492	24.6065	2.64571	up	1.9861	up	K22683|5.1e-07|smo:SELMODRAFT_426333|K22683 aspartyl protease family protein [EC:3.4.23.-] | (RefSeq) hypothetical protein	--
gene_Bol014705	gene_Bol014705	LOC106309416	156.824	148.239	138.739	622.696	640.713	531.189	1134.39	879.385	1731.9	1.72139	up	1.56726	up	K01738|1.1e-168|bna:106372722|K01738 cysteine synthase [EC:2.5.1.47] | (RefSeq) cysteine synthase	Cysteine and methionine metabolism (ko00270);; Sulfur metabolism (ko00920);; Carbon metabolism (ko01200);; Biosynthesis of amino acids (ko01230)
gene_Bol014766	gene_Bol014766	LOC106344732	4.8304	10.3914	5.40149	204.514	159.095	282.747	303.897	290.03	214.982	4.65613	up	0.719514	up	--	--
gene_Bol014777	gene_Bol014777	LOC106336929	5.4172	5.95478	6.1981	14.9199	15.036	11.6651	20.9624	13.3986	15.4712	0.946048	up	0.675261	up	K14400|2.8e-46|aof:109844760|K14400 pre-mRNA cleavage complex 2 protein Pcf11 | (RefSeq) LOW QUALITY PROTEIN: uncharacterized protein LOC109844760	mRNA surveillance pathway (ko03015)
gene_Bol014813	gene_Bol014813	--	100.047	86.7111	116.386	212.386	210.459	248.303	266.844	292.718	261.472	0.843564	up	0.713971	up	K00477|1.4e-164|brp:103854067|K00477 phytanoyl-CoA hydroxylase [EC:1.14.11.18] | (RefSeq) phytanoyl-CoA dioxygenase	Peroxisome (ko04146)
gene_Bol014828	gene_Bol014828	LOC111202685	0.3104	0.251463	0.314435	6.39628	13.3524	6.29377	12.588	15.1147	18.2264	4.23018	up	1.26886	up	--	--
gene_Bol014848	gene_Bol014848	LOC106322957	4.54961	6.61592	4.47353	29.5308	34.1786	46.7648	54.2907	44.7359	38.1259	2.51434	up	0.712031	up	K19564|5.2e-59|qsu:111984493|K19564 choline transport protein | (RefSeq) choline transport protein-like	--
gene_Bol014886	gene_Bol014886	LOC106419542	9.79638	24.835	26.2458	353.358	416.978	258.716	652.498	761.344	1129.02	3.76983	up	1.79639	up	K14445|4.2e-311|bna:106419542|K14445 solute carrier family 13 (sodium-dependent dicarboxylate transporter), member 2/3/5 | (RefSeq) tonoplast dicarboxylate transporter isoform X3	--
gene_Bol014950	gene_Bol014950	LOC106366223	0.241316	0.371666	0.181794	14.2078	18.0732	7.03672	24.1137	14.2809	29.145	5.28662	up	1.26195	up	K24104|9.3e-66|thj:104799061|K24104 GPN-loop GTPase | (RefSeq) LOW QUALITY PROTEIN: uncharacterized protein LOC104799061	--
gene_Bol014956	gene_Bol014956	LOC106366215	1.73298	0.695573	0.157626	11.236	18.9321	7.29767	39.3632	19.6993	29.6343	3.60068	up	1.66564	up	K24104|5.5e-94|thj:104799061|K24104 GPN-loop GTPase | (RefSeq) LOW QUALITY PROTEIN: uncharacterized protein LOC104799061	--
gene_Bol014965	gene_Bol014965	--	826.021	610.791	725.113	3405.9	2940.48	2551.78	4946.77	5519.84	4097.49	1.74695	up	1.10983	up	K01919|2.8e-304|boe:106311424|K01919 glutamate--cysteine ligase [EC:6.3.2.2] | (RefSeq) glutamate--cysteine ligase, chloroplastic	Cysteine and methionine metabolism (ko00270);; Glutathione metabolism (ko00480)
gene_Bol015039	gene_Bol015039	--	0.802419	0.037326	0	19.8039	11.7633	7.9339	238.251	244.982	512.948	5.27021	up	5.19368	up	K16815|8.0e-12|gsl:Gasu_03780|K16815 calcium-independent phospholipase A2-gamma | (RefSeq) hypothetical protein	--
gene_Bol015060	gene_Bol015060	LOC106384058	6.33008	8.23853	5.17293	14.1466	13.9969	11.0915	50.2324	29.5838	131.987	0.696587	up	3.02654	up	K17108|0.0e+00|bna:106384058|K17108 non-lysosomal glucosylceramidase [EC:3.2.1.45] | (RefSeq) non-lysosomal glucosylceramidase	Other glycan degradation (ko00511);; Sphingolipid metabolism (ko00600)
gene_Bol015062	gene_Bol015062	LOC111212847	19.688	16.9489	17.3734	38.6809	33.4922	35.7412	45.6729	36.2361	47.2114	0.701018	up	0.710884	up	--	--
gene_Bol015077	gene_Bol015077	--	11.0539	19.8086	21.6898	231.655	183.249	90.865	310.798	196.389	832.534	2.95896	up	1.99771	up	--	--
gene_Bol015088	gene_Bol015088	--	2.08527	1.49879	1.53446	24.9521	17.0311	13.6614	35.2736	17.5034	26.0947	3.14127	up	0.935041	up	K08246|1.3e-162|bna:106388470|K08246 cycloeucalenol cycloisomerase [EC:5.5.1.9] | (RefSeq) cycloeucalenol cycloisomerase-like	Steroid biosynthesis (ko00100)
gene_Bol015094	gene_Bol015094	LOC106333873	1.66224	0.906158	0.603223	4.04894	4.98388	2.20842	4.42188	8.77126	4.85313	1.53378	up	1.0584	up	K14488|1.7e-90|bna:106385966|K14488 SAUR family protein | (RefSeq) auxin-responsive protein SAUR71	Plant hormone signal transduction (ko04075)
gene_Bol015097	gene_Bol015097	LOC106331600	28.2094	25.27	26.447	52.0183	57.5819	59.6152	76.945	66.7793	56.9242	0.784529	up	0.64635	up	K09660|5.7e-127|bna:106388462|K09660 mannose-P-dolichol utilization defect 1 | (RefSeq) mannose-P-dolichol utilization defect 1 protein homolog 2	--
gene_Bol015138	gene_Bol015138	--	2.40145	1.57098	3.9995	9.31892	8.68139	6.59297	22.0688	14.9216	13.0284	1.31848	up	1.40759	up	--	--
gene_Bol015225	gene_Bol015225	LOC106342141	108.152	151.116	118.392	1207.28	1214.09	967.303	1658.6	1662	1072.38	2.86668	up	0.749075	up	K16292|5.9e-120|csl:COCSUDRAFT_21961|K16292 KDEL-tailed cysteine endopeptidase [EC:3.4.22.-] | (RefSeq) hypothetical protein	--
gene_Bol015237	gene_Bol015237	--	0.196522	1.3675	0.538176	3.28125	2.5873	1.76206	10.4965	11.2066	14.2356	1.53059	up	2.69525	up	--	--
gene_Bol015320	gene_Bol015320	LOC111203701	0.07528	0.203591	0.232443	2.96281	2.9604	1.76419	30.2542	4.33585	42.9941	3.47745	up	3.88566	up	--	--
gene_Bol015428	gene_Bol015428	LOC17882855	23.9733	26.6998	23.8184	57.0879	49.2149	46.8709	72.2628	63.7069	67.0423	0.740664	up	0.835692	up	K03038|7.3e-156|boe:106328876|K03038 26S proteasome regulatory subunit N8 | (RefSeq) 26S proteasome non-ATPase regulatory subunit 7 homolog A	Proteasome (ko03050)
gene_Bol015434	gene_Bol015434	--	2.22859	6.02741	5.48471	12.0466	10.6596	9.71537	17.6056	16.1941	8.51209	0.922724	up	0.735372	up	K20393|1.3e-111|bna:106427798|K20393 PRA1 family protein 3 | (RefSeq) PRA1 family protein A2	--
gene_Bol015457	gene_Bol015457	LOC106332476	1.53252	1.27607	4.05715	71.2724	74.0082	56.6384	131.963	207.401	676.847	4.55691	up	2.94712	up	K14493|4.2e-43|smo:SELMODRAFT_450797|K14493 gibberellin receptor GID1 [EC:3.-.-.-] | (RefSeq) GID1b-1; hypothetical protein	Plant hormone signal transduction (ko04075)
gene_Bol015480	gene_Bol015480	--	0	0	0.357359	17.534	7.57865	10.9607	10.6749	64.8495	80.2416	6.24554	up	2.64648	up	K07025|5.3e-71|boe:106322978|K07025 putative hydrolase of the HAD superfamily | (RefSeq) suppressor of disruption of TFIIS-like	--
gene_Bol015529	gene_Bol015529	--	0.770267	0.570937	1.81912	7.09767	4.87638	6.00047	9.96578	9.15564	4.39224	2.18377	up	0.733108	up	K05857|0.0e+00|bna:106388090|K05857 phosphatidylinositol phospholipase C, delta [EC:3.1.4.11] | (RefSeq) phosphoinositide phospholipase C 1-like isoform X1	Inositol phosphate metabolism (ko00562);; Phosphatidylinositol signaling system (ko04070)
gene_Bol015543	gene_Bol015543	--	14.5914	15.5451	13.4007	39.198	34.7122	25.036	89.5712	63.3186	112.362	0.889476	up	1.90597	up	K08867|0.0e+00|bna:106388190|K08867 WNK lysine deficient protein kinase [EC:2.7.11.1] | (RefSeq) probable serine/threonine-protein kinase WNK4 isoform X1	--
gene_Bol015556	gene_Bol015556	--	0.27793	0.535557	0.653757	2.35916	2.3221	1.91189	4.8589	4.96837	8.31069	1.85113	up	1.95966	up	K11238|5.2e-15|qsu:112023085|K11238 cytokinesis protein | (RefSeq) cytokinesis protein sepA-like	--
gene_Bol015557	gene_Bol015557	LOC106325732	1.64917	1.51395	0.619311	4.37744	3.5207	2.54768	6.78512	3.84495	4.10608	1.1743	up	0.892423	up	--	--
gene_Bol015601	gene_Bol015601	--	11.875	9.64921	8.64057	53.5048	53.5381	42.7472	55.0279	61.0864	57.9509	2.02193	up	0.645517	up	K07203|0.0e+00|boe:106300015|K07203 serine/threonine-protein kinase mTOR [EC:2.7.11.1] | (RefSeq) serine/threonine-protein kinase TOR	Autophagy - other (ko04136)
gene_Bol015680	gene_Bol015680	LOC106300814	4.76926	6.63344	5.03583	12.4705	10.7966	14.3004	16.1505	13.0694	33.7233	0.885961	up	1.2954	up	K13416|3.4e-57|cam:101506449|K13416 brassinosteroid insensitive 1-associated receptor kinase 1 [EC:2.7.10.1 2.7.11.1] | (RefSeq) BRASSINOSTEROID INSENSITIVE 1-associated receptor kinase 1	MAPK signaling pathway - plant (ko04016);; Plant hormone signal transduction (ko04075);; Plant-pathogen interaction (ko04626)
gene_Bol015681	gene_Bol015681	--	9.93798	12.3005	10.0962	33.8511	28.2716	23.9579	45.2781	37.8196	78.9447	1.1128	up	1.43342	up	K18081|5.4e-10|bna:106425271|K18081 myotubularin-related protein 1/2 [EC:3.1.3.64 3.1.3.95] | (RefSeq) phosphatidylinositol-3-phosphatase myotubularin-2-like	Inositol phosphate metabolism (ko00562);; Phosphatidylinositol signaling system (ko04070)
gene_Bol015767	gene_Bol015767	LOC111210895	0.111543	0.25433	0	10.8834	11.2737	10.3395	28.8849	12.2195	44.2636	5.98593	up	1.93122	up	K00521|2.3e-29|cmos:111447866|K00521 ferric-chelate reductase [EC:1.16.1.7] | (RefSeq) ferric reduction oxidase 7, chloroplastic-like	--
gene_Bol015777	gene_Bol015777	LOC106317859	3.27238	10.5959	9.55107	22.535	18.2884	21.5844	48.5151	37.6406	73.0875	1.09512	up	1.85829	up	K14491|3.3e-11|cic:CICLE_v10007648mg|K14491 two-component response regulator ARR-B family | (RefSeq) hypothetical protein	Plant hormone signal transduction (ko04075)
gene_Bol015799	gene_Bol015799	LOC106324856	11.1624	8.07416	7.87614	17.1686	18.7329	14.3011	21.8505	26.2883	25.4548	0.600502	up	0.986058	up	K11885|7.7e-217|boe:106324856|K11885 DNA damage-inducible protein 1 | (RefSeq) DNA damage-inducible protein 1-like	--
gene_Bol015833	gene_Bol015833	LOC106332899	1.77331	0.259877	0.513897	38.5696	18.3487	8.50471	566.358	72.7219	126.353	4.39689	up	3.88011	up	K00430|4.1e-179|boe:106332899|K00430 peroxidase [EC:1.11.1.7] | (RefSeq) peroxidase 69	Phenylpropanoid biosynthesis (ko00940)
gene_Bol015835	gene_Bol015835	LOC106380265	1.63654	0.264623	0.933332	37.4698	20.0832	5.16161	444.788	67.0779	102.37	4.18178	up	3.62219	up	K00430|1.9e-189|bna:106380265|K00430 peroxidase [EC:1.11.1.7] | (RefSeq) peroxidase 69-like	Phenylpropanoid biosynthesis (ko00940)
gene_Bol015908	gene_Bol015908	--	21.1747	11.8979	17.7291	197.184	178.577	149.446	307.069	211.846	361.507	3.07822	up	1.22218	up	K07192|9.8e-215|bna:106375586|K07192 flotillin | (RefSeq) flotillin-like protein 3	--
gene_Bol015928	gene_Bol015928	LOC106336151	35.8341	46.8424	38.5579	153.318	165.813	129.132	298.403	284.095	395.445	1.58861	up	1.59635	up	K00232|0.0e+00|boe:106336151|K00232 acyl-CoA oxidase [EC:1.3.3.6] | (RefSeq) acyl-coenzyme A oxidase 2, peroxisomal	Fatty acid degradation (ko00071);; beta-Alanine metabolism (ko00410);; alpha-Linolenic acid metabolism (ko00592);; Propanoate metabolism (ko00640);; Biosynthesis of unsaturated fatty acids (ko01040);; Carbon metabolism (ko01200);; Fatty acid metabolism (ko01212);; Peroxisome (ko04146)
gene_Bol015943	gene_Bol015943	LOC106306006	82.9472	93.5215	107.749	273.662	290.242	248.9	434.132	378.343	338.174	1.2142	up	0.907454	up	K01681|0.0e+00|boe:106306006|K01681 aconitate hydratase [EC:4.2.1.3] | (RefSeq) aconitate hydratase 2, mitochondrial-like	Citrate cycle (TCA cycle) (ko00020);; Glyoxylate and dicarboxylate metabolism (ko00630);; Carbon metabolism (ko01200);; 2-Oxocarboxylic acid metabolism (ko01210);; Biosynthesis of amino acids (ko01230)
gene_Bol015972	gene_Bol015972	--	0	0	0	4.19076	4.02499	3.08509	7.9858	5.24758	5.84378	8.72367	up	1.15853	up	K01945|2.0e-40|bna:106362382|K01945 phosphoribosylamine---glycine ligase [EC:6.3.4.13] | (RefSeq) phosphoribosylamine--glycine ligase, chloroplastic isoform X1	Purine metabolism (ko00230)
gene_Bol016037	gene_Bol016037	--	49.787	39.2661	68.2351	484.534	532.286	521.745	632.311	555.015	542.914	2.98649	up	0.58832	up	K01373|2.0e-166|boe:106336114|K01373 cathepsin F [EC:3.4.22.41] | (RefSeq) cysteine proteinase RD19a-like	Plant-pathogen interaction (ko04626)
gene_Bol016038	gene_Bol016038	--	35.2572	25.8051	44.5251	331.2	367.337	359.775	433.013	363.182	415.927	3.0229	up	0.632015	up	K01373|1.3e-37|bna:106405911|K01373 cathepsin F [EC:3.4.22.41] | (RefSeq) cysteine protease RD19A	Plant-pathogen interaction (ko04626)
gene_Bol016072	gene_Bol016072	LOC106336225	25.1244	31.1873	22.1333	138.737	133.59	82.2533	222.48	169.494	261.085	1.88327	up	1.34894	up	K08900|5.2e-13|cit:102628180|K08900 mitochondrial chaperone BCS1 | (RefSeq) AAA-ATPase At3g50940-like	--
gene_Bol016092	gene_Bol016092	LOC106336478	32.384	21.1451	20.5872	67.0235	71.3078	49.3953	89.7574	72.1947	158.43	1.05569	up	1.29309	up	K16302|1.2e-256|bna:106439722|K16302 metal transporter CNNM | (RefSeq) DUF21 domain-containing protein At4g14230	--
gene_Bol016138	gene_Bol016138	LOC106298104	0	0	0	5.45198	2.73405	4.36335	9.7794	8.2369	3.56847	9.26712	up	1.11654	up	K23544|7.7e-40|brp:103842861|K23544 serine incorporator 1/3 | (RefSeq) serine incorporator 3	--
gene_Bol016237	gene_Bol016237	--	0	0.097462	0.199796	10.2664	15.2692	13.7441	54.8269	36.138	231.389	6.47189	up	3.67661	up	--	--
gene_Bol016238	gene_Bol016238	LOC106339866	0.253857	0	0.057787	6.78747	2.93697	4.76375	38.8817	50.4694	85.8234	5.16367	up	4.12098	up	K17500|2.6e-57|nto:104085001|K17500 integrin-linked kinase-associated serine/threonine phosphatase 2C [EC:3.1.3.16] | (RefSeq) WAT1-related protein At3g18200 isoform X1	--
gene_Bol016410	gene_Bol016410	--	0.976689	1.43366	0.924669	17.1306	16.2563	6.06711	133.882	46.5221	325.759	3.26414	up	4.28253	up	K07192|2.4e-225|boe:106326646|K07192 flotillin | (RefSeq) flotillin-like protein 1 isoform X1	--
gene_Bol016454	gene_Bol016454	--	0.386828	0.160276	0.269634	1.17945	0.977076	0.727061	2.81617	2.68949	4.89211	1.53208	up	2.35575	up	K03006|9.1e-185|adu:107466525|K03006 DNA-directed RNA polymerase II subunit RPB1 [EC:2.7.7.6] | (RefSeq) LOW QUALITY PROTEIN: DNA-directed RNA polymerase II subunit 1-like	RNA polymerase (ko03020)
gene_Bol016466	gene_Bol016466	--	0	0.042557	0.081074	2.55443	2.17092	4.00167	6.50176	5.14921	2.59386	5.51039	up	1.05265	up	--	--
gene_Bol016469	gene_Bol016469	--	0.524688	0.406588	0.121611	5.667	5.90339	8.84835	15.4586	10.1327	6.36296	3.89874	up	0.998175	up	--	--
gene_Bol016483	gene_Bol016483	LOC106323003	0.261696	0	0.465257	10.2181	6.97788	7.0601	77.5562	22.4317	156.946	4.69181	up	3.99593	up	K00511|9.1e-295|boe:106323003|K00511 squalene monooxygenase [EC:1.14.14.17] | (RefSeq) squalene epoxidase 4-like	Steroid biosynthesis (ko00100);; Sesquiterpenoid and triterpenoid biosynthesis (ko00909)
gene_Bol016724	gene_Bol016724	LOC106382088	0.249083	0.597762	0.429694	1.89784	2.23757	1.41947	0.247627	9.00052	7.85019	1.81799	up	2.11592	up	K14487|0.0e+00|bna:106382088|K14487 auxin responsive GH3 gene family | (RefSeq) 4-substituted benzoates-glutamate ligase GH3.12-like	Plant hormone signal transduction (ko04075)
gene_Bol016824	gene_Bol016824	LOC106433287	3.93817	3.50009	5.03256	27.5018	19.5925	29.9343	31.4361	42.4281	47.4288	2.31559	up	1.12427	up	K14497|5.5e-218|bna:106433287|K14497 protein phosphatase 2C [EC:3.1.3.16] | (RefSeq) probable protein phosphatase 2C 78	MAPK signaling pathway - plant (ko04016);; Plant hormone signal transduction (ko04075)
gene_Bol016869	gene_Bol016869	LOC106318852	11.2876	11.1984	7.58655	19.5114	27.5635	19.4027	79.0607	26.6245	28.9348	0.852835	up	1.37452	up	K01802|2.0e-112|bna:106430930|K01802 peptidylprolyl isomerase [EC:5.2.1.8] | (RefSeq) peptidyl-prolyl cis-trans isomerase CYP20-1	--
gene_Bol017007	gene_Bol017007	--	16.2356	15.2348	13.855	40.9092	35.0989	33.0518	47.6969	55.0538	43.4102	0.970519	up	0.830436	up	K08343|7.1e-178|boe:106301306|K08343 ubiquitin-like-conjugating enzyme ATG3 | (RefSeq) autophagy-related protein 3	Autophagy - other (ko04136)
gene_Bol017008	gene_Bol017008	LOC106301307	2.07859	1.11539	0.580282	11.138	10.3557	12.6186	16.6641	16.0882	8.40315	2.87928	up	0.628254	up	--	--
gene_Bol017024	gene_Bol017024	LOC106303768	0.064162	0.511563	0.532386	14.7177	11.8533	7.1786	19.2925	24.5266	17.5002	4.60199	up	1.25855	up	--	--
gene_Bol017077	gene_Bol017077	--	4.94931	4.44594	4.39928	10.2579	10.9159	10.0111	14.847	12.1638	17.2547	0.880657	up	0.968261	up	K13123|0.0e+00|boe:106306177|K13123 G patch domain-containing protein 1 | (RefSeq) G patch domain-containing protein TGH	--
gene_Bol017341	gene_Bol017341	LOC106296973	0.394849	0.505009	0.331701	10.6181	12.2174	9.75674	48.2251	43.524	42.8372	4.39995	up	2.46209	up	K12835|4.2e-31|cmax:111493042|K12835 ATP-dependent RNA helicase DDX42 [EC:3.6.4.13] | (RefSeq) DEAD-box ATP-dependent RNA helicase 24 isoform X1	Spliceosome (ko03040)
gene_Bol017376	gene_Bol017376	--	0.788333	2.39817	2.08186	7.06399	7.63556	7.8589	21.4413	10.6645	12.4414	1.7561	up	1.36776	up	K00517|1.2e-31|bna:106403563|K00517 indol-3-yl-methylglucosinolate hydroxylase [EC:1.14.-.-] | (RefSeq) cytochrome P450 81F1 isoform X1	--
gene_Bol017392	gene_Bol017392	LOC106298921	0.289106	1.38684	1.47329	6.58934	4.32284	3.03739	20.2218	13.5913	60.6052	1.82109	up	3.35919	up	K07761|2.3e-114|thj:104823666|K07761 metalloendoproteinase 5-MMP [EC:3.4.24.-] | (RefSeq) metalloendoproteinase 5-MMP	--
gene_Bol017595	gene_Bol017595	LOC106339839	4.83629	3.41417	4.83877	187.825	149.397	93.5614	431.022	357.158	585.783	4.73968	up	2.1579	up	K08081|1.4e-147|boe:106339839|K08081 tropinone reductase I [EC:1.1.1.206] | (RefSeq) tropinone reductase homolog At2g30670-like isoform X1	Tropane, piperidine and pyridine alkaloid biosynthesis (ko00960)
gene_Bol017597	gene_Bol017597	--	0.771162	0.627876	1.2747	49.5548	30.2681	21.8033	87.4314	86.9932	46.4551	4.92748	up	1.47584	up	K08081|1.5e-84|brp:103868038|K08081 tropinone reductase I [EC:1.1.1.206] | (RefSeq) tropinone reductase homolog At2g30670 isoform X1	Tropane, piperidine and pyridine alkaloid biosynthesis (ko00960)
gene_Bol017621	gene_Bol017621	--	21.8123	22.841	37.9892	101.624	63.4753	74.3241	116.463	107.541	111.297	1.22209	up	0.919177	up	K17362|3.7e-82|bna:106422217|K17362 acyl-coenzyme A thioesterase 13 [EC:3.1.2.-] | (RefSeq) acyl-coenzyme A thioesterase 13-like	--
gene_Bol017622	gene_Bol017622	--	0.066492	0.068391	0.242065	13.3239	5.69665	7.0319	36.2209	23.0961	22.1947	5.69687	up	2.04574	up	K00770|4.2e-25|ccav:112518315|K00770 1,4-beta-D-xylan synthase [EC:2.4.2.24] | (RefSeq) cellulose synthase-like protein D5	Amino sugar and nucleotide sugar metabolism (ko00520)
gene_Bol017675	gene_Bol017675	--	0.227864	0	0	57.889	69.7865	25.2366	152.992	101.224	223.248	9.07126	up	2.14402	up	K22547|1.2e-73|bna:106395255|K22547 arsenate reductase [EC:1.20.4.1] | (RefSeq) protein HIGH ARSENIC CONTENT 1, mitochondrial	--
gene_Bol017891	gene_Bol017891	--	13.663	7.88315	11.2356	23.3227	23.4458	22.1589	29.4787	22.1802	26.2893	0.778638	up	0.60938	up	K13148|1.7e-33|nsy:104217392|K13148 integrator complex subunit 11 [EC:3.1.27.-] | (RefSeq) cleavage and polyadenylation specificity factor subunit 3-II	--
gene_Bol017928	gene_Bol017928	LOC106401491	9.51575	9.17712	8.24921	96.5979	91.7836	97.437	182.34	171.352	197.89	3.10827	up	1.39561	up	K16279|4.1e-36|psom:113321710|K16279 E3 ubiquitin-protein ligase KEG [EC:2.7.11.1 2.3.2.27] | (RefSeq) E3 ubiquitin-protein ligase KEG-like	--
gene_Bol017986	gene_Bol017986	LOC106314897	5.90534	5.0325	4.3297	10.7903	9.41393	9.99381	11.0444	11.3495	11.2764	0.689184	up	0.587695	up	K07195|0.0e+00|boe:106314897|K07195 exocyst complex component 7 | (RefSeq) exocyst complex component EXO70A1-like	--
gene_Bol018012	gene_Bol018012	LOC17879034	14.3296	16.0709	17.9156	51.9305	49.1608	59.2835	73.851	68.9578	73.5909	1.42624	up	0.868016	up	K02738|2.4e-130|aly:9305408|K02738 20S proteasome subunit beta 1 [EC:3.4.25.1] | (RefSeq) proteasome subunit beta type-6	Proteasome (ko03050)
gene_Bol018055	gene_Bol018055	--	9.13561	7.17744	9.00447	25.4728	21.1746	22.4087	37.0901	29.8237	46.1433	1.14889	up	1.18812	up	K08330|0.0e+00|boe:106304336|K08330 autophagy-related protein 11 | (RefSeq) putative leucine-rich repeat-containing protein DDB_G0290503 isoform X1	Autophagy - other (ko04136)
gene_Bol018095	gene_Bol018095	LOC106416630	0.937368	1.76654	2.26656	157.304	181.106	110.419	281.893	283.799	606.683	6.18165	up	1.9184	up	K16292|2.1e-106|smo:SELMODRAFT_428615|K16292 KDEL-tailed cysteine endopeptidase [EC:3.4.22.-] | (RefSeq) hypothetical protein	--
gene_Bol018146	gene_Bol018146	BNAC05G32780D	0.157294	0.250677	0	5.38422	3.71925	2.39203	21.9478	3.83546	7.92103	4.49818	up	1.92402	up	--	--
gene_Bol018236	gene_Bol018236	LOC106327268	12.3122	15.3326	15.8401	46.1108	41.5614	49.1234	59.2594	49.4768	45.9359	1.34615	up	0.588131	up	K10875|1.7e-22|psom:113287916|K10875 DNA repair and recombination protein RAD54 and RAD54-like protein [EC:3.6.4.-] | (RefSeq) protein CHROMATIN REMODELING 25-like	Homologous recombination (ko03440)
gene_Bol018247	gene_Bol018247	--	0.69755	0.440937	1.21134	5.59528	4.85903	2.15471	30.6316	21.79	38.9384	2.11187	up	3.33676	up	--	--
gene_Bol018262	gene_Bol018262	--	18.127	17.4297	20.913	49.7455	66.1812	45.2273	78.6578	66.8312	106.685	1.21682	up	1.12507	up	K03809|5.0e-105|bna:106390101|K03809 NAD(P)H dehydrogenase (quinone) [EC:1.6.5.2] | (RefSeq) NAD(P)H dehydrogenase (quinone) FQR1	Ubiquinone and other terpenoid-quinone biosynthesis (ko00130)
gene_Bol018295	gene_Bol018295	--	0.101566	0.042951	0	0.765499	0.549506	0.288914	1.29237	1.65687	1.05613	3.20169	up	1.6882	up	K01099|1.1e-167|nsy:104233283|K01099 inositol polyphosphate 5-phosphatase INPP5B/F [EC:3.1.3.36] | (RefSeq) type II inositol 1,4,5-trisphosphate 5-phosphatase FRA3-like isoform X1	Inositol phosphate metabolism (ko00562);; Phosphatidylinositol signaling system (ko04070)
gene_Bol018314	gene_Bol018314	LOC106309406	0	0	0	2.36541	2.99926	1.69806	5.32036	3.045	5.70251	8.39695	up	1.44747	up	K14780|7.4e-56|dcr:108220614|K14780 ATP-dependent RNA helicase DHX37/DHR1 [EC:3.6.4.13] | (RefSeq) ATP-dependent RNA helicase DEAH13-like isoform X1	--
gene_Bol018369	gene_Bol018369	LOC106308069	21.91	13.9601	15.1115	39.5161	43.5027	40.4373	45.6852	105.896	35.2315	0.986025	up	0.935602	up	--	--
gene_Bol018376	gene_Bol018376	LOC106310408	0.986129	1.04432	1.81553	4.25397	9.31542	5.78463	41.3135	18.9139	53.0843	2.01718	up	3.04264	up	K03676|2.9e-23|hbr:110652949|K03676 glutaredoxin 3 | (RefSeq) glutaredoxin-C9-like	--
gene_Bol018381	gene_Bol018381	LOC106308310	0.420835	0.159182	0.296656	16.303	18.1442	11.8135	44.1458	25.2609	51.0512	5.393	up	1.8613	up	K08819|2.7e-67|mtr:MTR_2g090405|K08819 cyclin-dependent kinase 12/13 [EC:2.7.11.22 2.7.11.23] | (RefSeq) cyclin-dependent kinase	--
gene_Bol018392	gene_Bol018392	--	1.20423	2.28808	3.63718	8.61085	52.6129	17.7126	116.781	82.622	187.964	3.16455	up	2.79523	up	K22683|1.5e-16|sind:105173723|K22683 aspartyl protease family protein [EC:3.4.23.-] | (RefSeq) aspartyl protease family protein 2	--
gene_Bol018410	gene_Bol018410	LOC106309537	17.1714	17.0287	17.516	52.9626	49.8818	51.053	136.957	76.8395	338.786	1.27365	up	2.43562	up	K16275|7.3e-188|boe:106309537|K16275 E3 ubiquitin-protein ligase BAH [EC:2.3.2.27] | (RefSeq) E3 ubiquitin-protein ligase BAH1-like	--
gene_Bol018424	gene_Bol018424	--	0.702577	4.66141	0	29.2691	46.6563	64.0465	54.4578	89.8763	72.5345	4.39349	up	1.0631	up	--	--
gene_Bol018465	gene_Bol018465	LOC106377367	49.9524	40.7353	91.8711	189.397	208.332	143.294	314.911	272.951	127.633	1.2617	up	0.735164	up	--	--
gene_Bol018521	gene_Bol018521	LOC106301139	2.47737	5.7117	4.95587	9.77069	11.3979	16.7173	13.8834	12.1866	59.2481	1.20805	up	1.80617	up	K20557|1.1e-41|qsu:112021095|K20557 transcription factor VIP1 | (RefSeq) transcription factor VIP1-like	MAPK signaling pathway - plant (ko04016)
gene_Bol018524	gene_Bol018524	LOC106306095	6.33948	4.31205	6.51971	10.8665	12.3245	9.85915	17.2749	10.2672	11.35	0.649979	up	0.637537	up	--	--
gene_Bol018577	gene_Bol018577	LOC106410587	19.359	19.0607	20.5981	51.7245	44.8318	46.2996	60.2891	58.6507	53.0532	0.974329	up	0.684875	up	K05677|8.5e-86|cme:CYME_CMC011C|K05677 ATP-binding cassette, subfamily D (ALD), member 3 | (RefSeq) ATP-binding cassette, sub-family D, member 3	ABC transporters (ko02010);; Peroxisome (ko04146)
gene_Bol018585	gene_Bol018585	--	23.9173	16.5998	6.59402	34.6121	57.3747	26.6731	50.7656	50.6399	61.3252	1.06573	up	0.903164	up	K11812|0.0e+00|boe:106301717|K11812 tryptophan N-monooxygenase [EC:1.14.14.156] | (RefSeq) cytochrome P450 79B1	Tryptophan metabolism (ko00380);; Glucosinolate biosynthesis (ko00966);; 2-Oxocarboxylic acid metabolism (ko01210)
gene_Bol018605	gene_Bol018605	LOC106306043	9.62623	9.99639	8.74381	41.7527	45.0805	25.5499	54.7476	45.6183	51.9211	1.69467	up	0.869816	up	K01537|0.0e+00|boe:106306043|K01537 P-type Ca2+ transporter type 2C [EC:7.2.2.10] | (RefSeq) calcium-transporting ATPase 2, plasma membrane-type	--
gene_Bol018620	gene_Bol018620	LOC106407636	4.45872	6.20976	6.46542	30.0892	33.021	29.8169	87.1126	64.5872	62.609	2.1347	up	1.61047	up	K13260|1.4e-180|bna:106391411|K13260 isoflavone/4'-methoxyisoflavone 2'-hydroxylase [EC:1.14.14.90 1.14.14.89] | (RefSeq) cytochrome P450 81D11-like	Isoflavonoid biosynthesis (ko00943)
gene_Bol018630	gene_Bol018630	LOC106306011	1.29387	1.61499	1.58375	7.86428	10.97	7.18138	33.6806	13.7056	51.5767	2.22535	up	2.46238	up	--	--
gene_Bol018637	gene_Bol018637	LOC106304203	0.254923	0	0	8.13255	9.8553	11.4314	116.151	44.5135	168.863	6.47271	up	4.01936	up	K16815|1.8e-11|gsl:Gasu_03780|K16815 calcium-independent phospholipase A2-gamma | (RefSeq) hypothetical protein	--
gene_Bol018638	gene_Bol018638	LOC106302114	1.84576	0.150534	2.12815	5.6606	2.69581	7.53377	20.8271	4.78005	39.085	1.62822	up	2.62068	up	K20802|7.0e-62|ath:AT5G10300|K20802 (R)-mandelonitrile lyase [EC:4.1.2.10] | (RefSeq) MES5; methyl esterase 5	Cyanoamino acid metabolism (ko00460)
gene_Bol018660	gene_Bol018660	LOC106411030	13.1671	8.41671	8.04576	51.5126	56.4555	33.641	78.5947	110.594	138.709	1.968	up	1.68885	up	--	--
gene_Bol018690	gene_Bol018690	LOC106303681	56.4353	80.8523	155.371	266.458	288.835	298.78	309.298	338.958	332.802	1.22803	up	0.634168	up	K07877|1.1e-106|boe:106303681|K07877 Ras-related protein Rab-2A | (RefSeq) ras-related protein RABB1b	--
gene_Bol018828	gene_Bol018828	LOC106383006	1.63477	2.60207	1.85842	8.59849	9.04507	11.4128	16.8387	13.3883	7.36411	1.93643	up	0.720067	up	K11462|4.0e-220|bna:106383006|K11462 polycomb protein EED | (RefSeq) polycomb group protein FERTILIZATION-INDEPENDENT ENDOSPERM-like	--
gene_Bol018888	gene_Bol018888	LOC106314539	0.448475	0.782552	0.479255	20.8304	24.8859	11.2934	88.6883	35.0996	126.184	4.69901	up	2.65591	up	--	--
gene_Bol018907	gene_Bol018907	LOC106416641	4.7789	6.94645	6.18486	8.29806	12.4692	12.6049	23.7007	20.3942	21.1747	0.59612	up	1.39038	up	K14445|1.2e-312|bna:106416641|K14445 solute carrier family 13 (sodium-dependent dicarboxylate transporter), member 2/3/5 | (RefSeq) tonoplast dicarboxylate transporter-like	--
gene_Bol018908	gene_Bol018908	LOC106417991	16.2201	6.72715	8.7954	78.7102	104.189	42.1983	116.247	110.315	188.127	2.54854	up	1.37412	up	K13899|9.8e-16|pmum:103326979|K13899 cystatin-C | (RefSeq) cysteine proteinase inhibitor 1	--
gene_Bol018960	gene_Bol018960	LOC103853126	3.69324	4.32334	5.69061	29.5576	32.4785	34.4908	42.6354	37.3578	37.6231	2.50326	up	0.704993	up	--	--
gene_Bol018975	gene_Bol018975	LOC106326782	5.69754	4.03024	4.00965	11.7665	11.0851	9.03341	15.3253	10.6251	12.7395	0.923999	up	0.705705	up	K23677|1.5e-190|gra:105802280|K23677 MFS transporter, Spinster family, sphingosine-1-phosphate transporter | (RefSeq) uncharacterized LOC105802280	--
gene_Bol019328	gene_Bol019328	--	0.1815	0.188055	0.147272	1.90954	0.945289	1.52913	7.25503	2.68284	2.95287	2.75966	up	1.92914	up	K11000|0.0e+00|bna:106407534|K11000 callose synthase [EC:2.4.1.-] | (RefSeq) callose synthase 5-like isoform X1	--
gene_Bol019329	gene_Bol019329	LOC106410724	59.237	77.2724	101.871	1393.12	1630.28	1648.98	1898.33	2764.43	1237.11	3.98414	up	0.68936	up	K00140|4.7e-299|bna:106410724|K00140 malonate-semialdehyde dehydrogenase (acetylating) / methylmalonate-semialdehyde dehydrogenase [EC:1.2.1.18 1.2.1.27] | (RefSeq) methylmalonate-semialdehyde dehydrogenase [acylating], mitochondrial isoform X2	Valine, leucine and isoleucine degradation (ko00280);; beta-Alanine metabolism (ko00410);; Inositol phosphate metabolism (ko00562);; Propanoate metabolism (ko00640);; Carbon metabolism (ko01200)
gene_Bol019433	gene_Bol019433	LOC106328615	36.4198	42.9165	36.5139	92.9098	100.715	89.6731	125.56	111.039	124.981	0.99211	up	0.788906	up	--	--
gene_Bol019479	gene_Bol019479	LOC106299289	26.1383	43.4212	58.6535	203.224	264.638	129.772	401.843	258.39	255.474	1.91641	up	1.00772	up	--	--
gene_Bol019499	gene_Bol019499	--	0.306372	0.296581	0.908644	6.56383	5.63609	3.22948	15.9067	4.57812	21.8687	3.02243	up	1.9921	up	K16224|8.1e-31|eus:EUTSA_v10023115mg|K16224 senescence-induced receptor-like serine/threonine-protein kinase | (RefSeq) hypothetical protein	MAPK signaling pathway - plant (ko04016);; Plant-pathogen interaction (ko04626)
gene_Bol019575	gene_Bol019575	LOC106355830	0	0	0	0.931952	1.03986	0.668199	2.97268	1.02534	5.8846	8.51642	up	2.46902	up	K16224|1.5e-104|bna:106356473|K16224 senescence-induced receptor-like serine/threonine-protein kinase | (RefSeq) senescence-induced receptor-like serine/threonine-protein kinase	MAPK signaling pathway - plant (ko04016);; Plant-pathogen interaction (ko04626)
gene_Bol019581	gene_Bol019581	--	8.21752	9.32002	9.97021	25.1352	21.6354	22.9725	33.8138	32.6768	33.5783	1.03861	up	0.954333	up	K08333|0.0e+00|boe:106305100|K08333 phosphoinositide-3-kinase, regulatory subunit 4 [EC:2.7.11.1] | (RefSeq) phosphoinositide 3-kinase regulatory subunit 4	Autophagy - other (ko04136)
gene_Bol019621	gene_Bol019621	LOC106296301	1.88382	2.89881	3.05146	220.802	199.749	84.6677	921.668	575.7	998.281	5.70549	up	2.77123	up	K07870|5.4e-17|pxb:103958384|K07870 mitochondrial Rho GTPase 1 [EC:3.6.5.-] | (RefSeq) uncharacterized protein LOC103958384	--
gene_Bol019664	gene_Bol019664	--	12.8772	11.8628	9.99044	38.7441	32.5512	36.9705	76.3557	64.2572	74.9611	1.34338	up	1.43532	up	K03028|0.0e+00|brp:103854417|K03028 26S proteasome regulatory subunit N1 | (RefSeq) 26S proteasome non-ATPase regulatory subunit 2 homolog A	Proteasome (ko03050)
gene_Bol019668	gene_Bol019668	--	0.314472	0	0	35.9405	49.8828	9.73602	81.7371	34.496	128.039	7.91676	up	1.88418	up	K00815|7.3e-175|boe:106292912|K00815 tyrosine aminotransferase [EC:2.6.1.5] | (RefSeq) probable aminotransferase TAT1	Ubiquinone and other terpenoid-quinone biosynthesis (ko00130);; Cysteine and methionine metabolism (ko00270);; Tyrosine metabolism (ko00350);; Phenylalanine metabolism (ko00360);; Phenylalanine, tyrosine and tryptophan biosynthesis (ko00400);; Isoquinoline alkaloid biosynthesis (ko00950);; Tropane, piperidine and pyridine alkaloid biosynthesis (ko00960)
gene_Bol019702	gene_Bol019702	--	3.1605	3.47724	3.6926	19.445	18.9765	16.5596	64.9016	38.2503	80.5647	2.10859	up	2.23195	up	K16302|2.2e-31|apro:F751_6247|K16302 metal transporter CNNM | (RefSeq) Protein MAM3	--
gene_Bol019703	gene_Bol019703	--	4.51291	3.10477	3.19317	8.28703	6.51286	6.92816	20.7872	18.5953	20.828	0.708911	up	1.90671	up	--	--
gene_Bol019728	gene_Bol019728	LOC106316361	50.5585	48.31	65.3588	248.514	234.605	157.095	297.182	319.575	412.187	1.66375	up	1.15268	up	K09875|2.5e-130|boe:106316361|K09875 aquaporin SIP | (RefSeq) probable aquaporin SIP1-2	--
gene_Bol019730	gene_Bol019730	LOC106315785	2.93056	0.217073	7.31944	18.7304	21.864	14.1411	34.9875	49.0519	60.9609	2.06944	up	1.88164	up	K00521|2.8e-34|cmos:111447866|K00521 ferric-chelate reductase [EC:1.16.1.7] | (RefSeq) ferric reduction oxidase 7, chloroplastic-like	--
gene_Bol019812	gene_Bol019812	LOC106318596	8.5231	8.85525	11.3189	24.4666	20.9218	24.7849	30.407	32.5371	48.3852	0.983016	up	1.15749	up	K08339|8.4e-193|boe:106318596|K08339 autophagy-related protein 5 | (RefSeq) autophagy protein 5	Autophagy - other (ko04136)
gene_Bol019841	gene_Bol019841	LOC106317929	10.5251	9.40034	6.94476	66.5079	76.8825	87.1855	110.171	123.278	108.531	2.80298	up	0.989886	up	K09419|2.3e-41|bna:106387696|K09419 heat shock transcription factor, other eukaryote | (RefSeq) heat stress transcription factor A-1b-like isoform X1	--
gene_Bol020026	gene_Bol020026	LOC106327456	22.2496	20.791	18.3755	73.7097	63.5274	55.2635	71.1474	81.8634	130.419	1.35354	up	1.06325	up	K01530|0.0e+00|bna:106431284|K01530 phospholipid-translocating ATPase [EC:7.6.2.1] | (RefSeq) phospholipid-transporting ATPase 10	--
gene_Bol020050	gene_Bol020050	--	15.5284	13.34	19.4325	35.0795	36.3801	35.274	34.9948	57.4688	36.2062	0.841841	up	0.667331	up	--	--
gene_Bol020078	gene_Bol020078	--	0.213042	0.278354	0.333341	5.66719	6.38169	2.5057	11.0866	5.59313	11.4121	3.80824	up	1.41353	up	--	--
gene_Bol020088	gene_Bol020088	LOC106418261	2.59149	2.87158	1.93521	12.5418	11.5056	15.3499	17.5297	19.7657	45.2151	2.10369	up	1.62072	up	K20770|2.3e-60|gab:108483715|K20770 (+)-delta-cadinene 8-hydroxylase [EC:1.14.-.-] | (RefSeq) flavonoid 3'-monooxygenase-like	--
gene_Bol020149	gene_Bol020149	LOC106381882	2.69279	3.50365	3.37082	7.37274	8.63905	9.51717	12.846	9.92528	10.8058	1.10858	up	0.817423	up	K00924|3.5e-233|bna:106381882|K00924 kinase [EC:2.7.1.-] | (RefSeq) probable serine/threonine-protein kinase PBL19	--
gene_Bol020355	gene_Bol020355	LOC106331307	46.9931	35.2768	39.9123	128.003	118.309	97.1837	200.455	221.938	306.947	1.19811	up	1.56795	up	K13424|2.2e-250|bna:106410925|K13424 WRKY transcription factor 33 | (RefSeq) probable WRKY transcription factor 33	MAPK signaling pathway - plant (ko04016);; Plant-pathogen interaction (ko04626)
gene_Bol020384	gene_Bol020384	LOC106329906	0.208527	0.419051	0	7.58962	3.14655	2.80849	5.22947	10.3766	19.6487	3.88128	up	1.92868	up	--	--
gene_Bol020424	gene_Bol020424	LOC106420616	1.61669	1.99094	5.30526	55.0528	52.6585	30.2661	281.725	112.694	819.339	3.63545	up	3.75701	up	K18368|1.1e-178|bna:106420616|K18368 caffeoylshikimate esterase [EC:3.1.1.-] | (RefSeq) caffeoylshikimate esterase-like isoform X1	Phenylpropanoid biosynthesis (ko00940)
gene_Bol020428	gene_Bol020428	LOC106334669	13.5308	10.6929	8.14344	24.9986	22.884	18.5218	23.2713	33.3078	43.3654	0.749335	up	1.07819	up	K05658|0.0e+00|boe:106334669|K05658 ATP-binding cassette, subfamily B (MDR/TAP), member 1 [EC:7.6.2.2] | (RefSeq) ABC transporter B family member 6	ABC transporters (ko02010)
gene_Bol020545	gene_Bol020545	--	1.73334	1.26948	1.86183	3.61176	3.8707	5.26351	6.87135	9.19823	15.0475	1.07966	up	1.80672	up	K00006|1.3e-263|bna:106437983|K00006 glycerol-3-phosphate dehydrogenase (NAD+) [EC:1.1.1.8] | (RefSeq) glycerol-3-phosphate dehydrogenase [NAD(+)] GPDHC1, cytosolic	Glycerophospholipid metabolism (ko00564)
gene_Bol020649	gene_Bol020649	--	1.14695	0.948733	1.5183	7.48411	3.733	5.70723	10.8336	9.69417	15.3735	1.90718	up	1.57721	up	K23544|1.1e-104|brp:103842861|K23544 serine incorporator 1/3 | (RefSeq) serine incorporator 3	--
gene_Bol020654	gene_Bol020654	LOC106397552	0.780959	0.431864	1.14778	9.04757	10.6765	6.5937	30.4849	24.2129	18.75	3.17282	up	1.85903	up	K23544|5.2e-102|brp:103842861|K23544 serine incorporator 1/3 | (RefSeq) serine incorporator 3	--
gene_Bol020856	gene_Bol020856	LOC106324672	26.1731	34.1763	34.5534	105.313	101.25	84.6264	253.375	156.159	263.426	1.31449	up	1.67393	up	--	--
gene_Bol020857	gene_Bol020857	--	5.61664	2.17413	8.64819	81.2104	65.2583	45.4265	96.7783	79.6801	90.529	3.24046	up	0.909933	up	K09874|1.8e-162|bna:106440453|K09874 aquaporin NIP | (RefSeq) probable aquaporin NIP5-1	--
gene_Bol020877	gene_Bol020877	LOC106320917	5.79006	14.7091	15.4336	31.5375	19.2402	28.6329	108.356	51.9412	66.1006	0.822167	up	1.92443	up	K18823|2.5e-91|lang:109334198|K18823 soyasaponin III rhamnosyltransferase [EC:2.4.1.273] | (RefSeq) soyasaponin III rhamnosyltransferase-like	--
gene_Bol020904	gene_Bol020904	--	0.3411	0.08741	1.26686	4.12291	4.80872	3.75983	6.33141	29.595	2.70807	2.57034	up	1.85887	up	K14638|0.0e+00|boe:106295069|K14638 solute carrier family 15 (peptide/histidine transporter), member 3/4 | (RefSeq) protein NRT1/ PTR FAMILY 7.3	--
gene_Bol020912	gene_Bol020912	LOC106292816	253.382	214.906	359.786	617.8	648.896	612.242	898.029	1180.59	1837.61	0.878082	up	1.56907	up	K17893|1.7e-187|boe:106292816|K17893 ubiquinol oxidase [EC:1.10.3.11] | (RefSeq) ubiquinol oxidase 3, mitochondrial	--
gene_Bol020960	gene_Bol020960	--	0	0	0	2.10338	3.43213	0.557722	12.3967	11.0109	8.73321	9.33746	up	2.77269	up	K16224|9.6e-266|bna:106356473|K16224 senescence-induced receptor-like serine/threonine-protein kinase | (RefSeq) senescence-induced receptor-like serine/threonine-protein kinase	MAPK signaling pathway - plant (ko04016);; Plant-pathogen interaction (ko04626)
gene_Bol021071	gene_Bol021071	--	0.208628	0	1.30819	18.0421	11.4769	10.3577	46.1645	7.12211	135.383	4.3236	up	2.88771	up	K07192|3.0e-40|bna:106382844|K07192 flotillin | (RefSeq) flotillin-like protein 3	--
gene_Bol021199	gene_Bol021199	LOC106322712	3.55955	4.36717	3.69958	8.57014	7.72	9.46951	10.3993	9.98319	11.1561	0.841139	up	0.735549	up	K05286|8.5e-285|bna:106429882|K05286 GPI mannosyltransferase 3 [EC:2.4.1.-] | (RefSeq) GPI mannosyltransferase 3-like	Glycosylphosphatidylinositol (GPI)-anchor biosynthesis (ko00563)
gene_Bol021450	gene_Bol021450	LOC106300810	34.379	36.3829	59.5924	262.006	242.523	233.606	370.051	324.305	275.672	2.19264	up	0.795851	up	K00864|8.8e-306|bna:106376655|K00864 glycerol kinase [EC:2.7.1.30] | (RefSeq) glycerol kinase	Glycerolipid metabolism (ko00561);; Plant-pathogen interaction (ko04626)
gene_Bol021522	gene_Bol021522	LOC106298474	6.23474	9.6789	11.3054	31.3662	25.8861	34.3733	55.7673	49.2216	95.1794	1.43701	up	1.64363	up	K02726|3.0e-128|bna:106402751|K02726 20S proteasome subunit alpha 2 [EC:3.4.25.1] | (RefSeq) proteasome subunit alpha type-2-A	Proteasome (ko03050)
gene_Bol021627	gene_Bol021627	LOC106394862	0.133842	0	0.077049	9.6705	11.1331	1.07768	11.566	20.3491	21.6125	6.11941	up	1.74709	up	K01183|1.5e-158|bna:106394862|K01183 chitinase [EC:3.2.1.14] | (RefSeq) endochitinase At2g43610	Amino sugar and nucleotide sugar metabolism (ko00520)
gene_Bol021733	gene_Bol021733	--	5.36043	5.96748	4.90468	12.5177	13.1954	12.7972	18.7246	14.8629	15.8595	0.948166	up	0.781507	up	K13254|4.0e-260|boe:106339391|K13254 spastin [EC:5.6.1.1] | (RefSeq) spastin-like	--
gene_Bol021766	gene_Bol021766	--	18.5108	19.9314	13.9452	38.1138	29.9797	44.0039	62.9853	46.2142	64.9686	0.795036	up	1.09413	up	--	--
gene_Bol021769	gene_Bol021769	--	3.23961	3.92013	2.06385	8.04582	9.0374	6.9153	12.8586	15.9109	25.2082	1.08572	up	1.67324	up	K02365|2.3e-77|boe:106337896|K02365 separase [EC:3.4.22.49] | (RefSeq) separase-like	--
gene_Bol021782	gene_Bol021782	--	0.204241	0.420237	0.142522	4.26393	3.13502	1.89579	4.33828	8.62216	2.97826	3.25146	up	1.1134	up	K19041|6.8e-58|nau:109226804|K19041 E3 ubiquitin-protein ligase RNF38/44 [EC:2.3.2.27] | (RefSeq) RING-H2 finger protein ATL20-like	--
gene_Bol021793	gene_Bol021793	LOC106420764	21.3423	23.8175	22.6715	84.524	99.8192	36.2066	85.4633	125.767	333.445	1.41025	up	1.88509	up	K23490|7.0e-74|bna:106420764|K23490 cytochrome b5 | (RefSeq) cytochrome B5-like	--
gene_Bol021795	gene_Bol021795	LOC106420597	13.7771	7.94191	24.401	59.7387	70.5649	104.238	126.369	90.7449	65.2483	2.03211	up	0.63961	up	K09338|1.2e-67|bna:106420597|K09338 homeobox-leucine zipper protein | (RefSeq) homeobox-leucine zipper protein ATHB-7-like	--
gene_Bol021813	gene_Bol021813	--	18.2385	12.6371	13.2847	46.643	34.9504	30.0459	49.6438	41.3142	89.4768	1.04662	up	1.21927	up	K05658|0.0e+00|boe:106342610|K05658 ATP-binding cassette, subfamily B (MDR/TAP), member 1 [EC:7.6.2.2] | (RefSeq) ABC transporter B family member 4-like	ABC transporters (ko02010)
gene_Bol021927	gene_Bol021927	LOC106447805	18.5813	10.3183	9.0965	3773.52	3556.96	3180.74	3742.55	4350.47	8168.52	7.82643	up	1.15829	up	K00430|4.8e-199|bna:106447805|K00430 peroxidase [EC:1.11.1.7] | (RefSeq) peroxidase 34	Phenylpropanoid biosynthesis (ko00940)
gene_Bol021948	gene_Bol021948	--	3.80985	3.341	2.76001	9.10881	8.19238	8.85432	11.6497	9.78888	9.09451	1.10338	up	0.63321	up	--	--
gene_Bol021961	gene_Bol021961	LOC106308824	3.90386	7.37115	7.38382	77.6822	65.6924	58.2817	87.5653	75.6384	108.39	3.12375	up	0.899858	up	K00826|3.8e-235|boe:106308824|K00826 branched-chain amino acid aminotransferase [EC:2.6.1.42] | (RefSeq) branched-chain-amino-acid aminotransferase 3, chloroplastic isoform X1	Cysteine and methionine metabolism (ko00270);; Valine, leucine and isoleucine degradation (ko00280);; Valine, leucine and isoleucine biosynthesis (ko00290);; Pantothenate and CoA biosynthesis (ko00770);; Glucosinolate biosynthesis (ko00966);; 2-Oxocarboxylic acid metabolism (ko01210);; Biosynthesis of amino acids (ko01230)
gene_Bol022048	gene_Bol022048	LOC106310625	0	0	0	3.66349	1.97827	2.04188	19.2285	7.02873	18.7113	7.8278	up	3.01912	up	K10773|1.5e-14|egu:105039152|K10773 endonuclease III [EC:4.2.99.18] | (RefSeq) putative DNA glycosylase At3g47830 isoform X1	Base excision repair (ko03410)
gene_Bol022051	gene_Bol022051	--	20.8081	24.9428	20.7299	47.6623	40.7643	41.5949	51.1505	42.4267	52.5585	0.667403	up	0.616544	up	K14297|0.0e+00|bna:106453101|K14297 nuclear pore complex protein Nup98-Nup96 | (RefSeq) nuclear pore complex protein NUP98A-like	RNA transport (ko03013)
gene_Bol022076	gene_Bol022076	--	0.385455	0.214198	0.609203	11.455	12.4266	10.8721	18.2157	17.6577	17.3918	4.49658	up	1.03551	up	--	--
gene_Bol022113	gene_Bol022113	LOC103836326	200.455	176.813	238.479	888.987	952.822	739.984	1347.7	1074.82	1965.47	1.76944	up	1.26173	up	--	--
gene_Bol022139	gene_Bol022139	--	23.9087	34.081	19.1533	75.2869	63.8261	34.5018	127.585	112.753	385.561	0.877951	up	2.43841	up	K07953|4.1e-107|bna:106453166|K07953 GTP-binding protein SAR1 [EC:3.6.5.-] | (RefSeq) GTP-binding protein SAR1B	Protein processing in endoplasmic reticulum (ko04141)
gene_Bol022140	gene_Bol022140	--	5.9805	5.47568	3.25325	9.48626	9.71234	10.0589	16.9991	9.56993	9.9936	0.699071	up	0.717113	up	--	--
gene_Bol022142	gene_Bol022142	LOC106311196	0.352486	0	0.104972	16.0848	12.2025	4.93991	53.2151	39.3407	243.298	5.69682	up	3.98185	up	--	--
gene_Bol022143	gene_Bol022143	LOC106453167	0.847965	0.777321	1.03073	4.4195	4.2602	1.45054	15.6672	12.4149	55.1357	1.63079	up	3.645	up	K10406|0.0e+00|bna:106453167|K10406 kinesin family member C2/C3 | (RefSeq) kinesin-like protein KIN-14H	--
gene_Bol022158	gene_Bol022158	LOC106453180	5.01806	6.40575	8.05962	124.706	120.37	59.7691	279.64	150.104	143.051	3.66435	up	1.28689	up	K03444|3.8e-217|boe:106312125|K03444 MFS transporter, SP family, ERD6-like sugar transporter | (RefSeq) sugar transporter ERD6	--
gene_Bol022159	gene_Bol022159	LOC106453182	3.75678	9.3793	6.67643	19.7276	19.4907	26.4096	97.854	51.9905	214.004	1.41182	up	3.05097	up	K03444|2.1e-192|bna:106453182|K03444 MFS transporter, SP family, ERD6-like sugar transporter | (RefSeq) sugar transporter ERD6-like 3	--
gene_Bol022191	gene_Bol022191	--	3.45883	6.69462	7.74934	53.5009	48.0521	47.8592	87.2626	69.6912	76.1517	2.74639	up	1.06982	up	K13199|3.9e-23|mtr:MTR_7g081660|K13199 plasminogen activator inhibitor 1 RNA-binding protein | (RefSeq) nuclear RNA-binding-like protein	--
gene_Bol022276	gene_Bol022276	--	45.6023	41.3898	49.8795	131.801	142.243	73.1045	242.891	131.006	209.136	1.05023	up	1.19034	up	K22207|5.0e-252|bna:106348715|K22207 L-cysteine desulfhydrase [EC:4.4.1.28] | (RefSeq) probable L-cysteine desulfhydrase, chloroplastic	Cysteine and methionine metabolism (ko00270)
gene_Bol022317	gene_Bol022317	LOC106306016	7.3572	6.57716	5.55598	21.8899	22.6293	14.0983	26.6141	19.4228	32.8993	1.29906	up	0.906371	up	K00924|3.8e-299|boe:106306016|K00924 kinase [EC:2.7.1.-] | (RefSeq) receptor-like protein kinase 5	--
gene_Bol022318	gene_Bol022318	LOC106348755	45.172	38.6771	33.3877	140.936	130.936	83.2738	152.357	190.685	193.39	1.31048	up	1.03903	up	K00924|0.0e+00|bna:106348755|K00924 kinase [EC:2.7.1.-] | (RefSeq) receptor-like protein kinase 5	--
gene_Bol022324	gene_Bol022324	LOC106348760	11.5271	10.6823	14.875	50.6898	46.574	37.2381	74.0649	73.1714	133.275	1.55758	up	1.57322	up	K18789|7.0e-79|psom:113275449|K18789 xylogalacturonan beta-1,3-xylosyltransferase [EC:2.4.2.41] | (RefSeq) probable glycosyltransferase At5g20260	--
gene_Bol022372	gene_Bol022372	LOC106303770	2.05507	2.67608	2.5916	11.2188	9.79938	7.9815	15.4185	13.799	11.2262	1.67723	up	0.872014	up	K22763|7.1e-124|boe:106303770|K22763 deubiquitinase DESI2 [EC:3.4.19.12] | (RefSeq) deSI-like protein At4g17486	--
gene_Bol022421	gene_Bol022421	--	3.02189	0.413798	0.294636	19.7942	15.7748	17.6978	26.2154	20.8309	17.1483	3.56537	up	0.662276	up	K12130|0.0e+00|bna:106348478|K12130 pseudo-response regulator 5 | (RefSeq) two-component response regulator-like APRR5	Circadian rhythm - plant (ko04712)
gene_Bol022430	gene_Bol022430	--	0	0	0	1.68438	1.70939	1.72291	6.51165	5.46132	3.39875	7.58191	up	1.94604	up	K01057|5.8e-149|bna:106414342|K01057 6-phosphogluconolactonase [EC:3.1.1.31] | (RefSeq) probable 6-phosphogluconolactonase 4	Pentose phosphate pathway (ko00030);; Carbon metabolism (ko01200)
gene_Bol022493	gene_Bol022493	LOC106294723	13.1842	21.1505	17.0933	34.3218	31.7671	31.758	62.8021	56.3467	86.6899	0.622722	up	1.55582	up	K20523|4.9e-289|boe:106294723|K20523 SH3 domain-containing YSC84-like protein 1 | (RefSeq) uncharacterized protein LOC106294723	--
gene_Bol022730	gene_Bol022730	--	0	0	0	1.32274	0.593773	0.89443	2.59672	1.67886	4.96677	7.66482	up	2.25528	up	K00279|3.5e-283|bna:111198549|K00279 cytokinin dehydrogenase [EC:1.5.99.12] | (RefSeq) cytokinin dehydrogenase 2-like isoform X1	Zeatin biosynthesis (ko00908)
gene_Bol022824	gene_Bol022824	LOC106326892	32.5827	39.5929	44.5538	82.765	83.3292	94.6609	111.548	135.014	103.564	0.853068	up	0.833847	up	K08337|0.0e+00|boe:106326892|K08337 ubiquitin-like modifier-activating enzyme ATG7 | (RefSeq) ubiquitin-like modifier-activating enzyme atg7	Autophagy - other (ko04136)
gene_Bol022825	gene_Bol022825	LOC106326894	0.541559	0	0	13.455	21.6807	41.9507	74.293	598.794	150.555	6.88066	up	3.75376	up	K16292|1.4e-67|vvi:100247167|K16292 KDEL-tailed cysteine endopeptidase [EC:3.4.22.-] | (RefSeq) senescence-specific cysteine protease SAG39	--
gene_Bol022865	gene_Bol022865	LOC106336227	12.3059	9.15138	7.77503	18.1249	19.8331	20.2753	28.2176	22.338	19.525	0.703688	up	0.664569	up	K14018|0.0e+00|boe:106336227|K14018 phospholipase A-2-activating protein | (RefSeq) phospholipase A-2-activating protein-like isoform X1	Protein processing in endoplasmic reticulum (ko04141)
gene_Bol022867	gene_Bol022867	LOC106328525	38.9118	39.6406	35.9403	99.2522	99.8988	100.998	117.048	114.119	105.643	1.09245	up	0.58532	up	K08150|7.1e-69|cqi:110718112|K08150 MFS transporter, SP family, solute carrier family 2 (myo-inositol transporter), member 13 | (RefSeq) inositol transporter 1-like	--
gene_Bol022931	gene_Bol022931	LOC103859711	7.22446	6.24774	4.41668	22.9103	20.9923	17.4716	47.5696	55.3652	49.4943	1.48612	up	1.73636	up	K07198|8.4e-249|brp:103859711|K07198 5'-AMP-activated protein kinase, catalytic alpha subunit [EC:2.7.11.11] | (RefSeq) CBL-interacting serine/threonine-protein kinase 1	--
gene_Bol023047	gene_Bol023047	--	0.705265	1.70991	1.25971	2.66536	3.50579	3.87935	12.4055	6.16625	9.21411	1.12221	up	1.8981	up	K04688|5.1e-230|boe:106323777|K04688 ribosomal protein S6 kinase beta [EC:2.7.11.1] | (RefSeq) serine/threonine-protein kinase AtPK2/AtPK19-like	--
gene_Bol023058	gene_Bol023058	--	0	0.299015	0.146485	12.5406	16.1483	7.52568	31.2873	17.2716	31.6313	5.97892	up	1.60646	up	K01988|4.6e-222|boe:106297793|K01988 lactosylceramide 4-alpha-galactosyltransferase [EC:2.4.1.228] | (RefSeq) lactosylceramide 4-alpha-galactosyltransferase-like	Glycosphingolipid biosynthesis - lacto and neolacto series (ko00601);; Glycosphingolipid biosynthesis - globo and isoglobo series (ko00603)
gene_Bol023070	gene_Bol023070	LOC103848211	1.27076	0.333783	0.521329	11.7213	11.8256	8.65323	24.6048	20.5584	11.7836	3.6312	up	1.1732	up	K01188|0.0e+00|bna:106427892|K01188 beta-glucosidase [EC:3.2.1.21] | (RefSeq) beta-glucosidase 23	Cyanoamino acid metabolism (ko00460);; Starch and sucrose metabolism (ko00500);; Phenylpropanoid biosynthesis (ko00940)
gene_Bol023240	gene_Bol023240	LOC103834874	28.1589	30.2539	24.0642	80.0568	86.8184	94.9824	97.5849	105.121	94.8155	1.3686	up	0.606017	up	K02728|2.0e-138|bna:106345534|K02728 20S proteasome subunit alpha 3 [EC:3.4.25.1] | (RefSeq) proteasome subunit alpha type-4-A	Proteasome (ko03050)
gene_Bol023248	gene_Bol023248	LOC106314343	255.507	366.524	532.728	1177.18	1229.21	1084.55	1602.89	1571.45	1172.61	1.28542	up	0.707564	up	K16871|2.4e-292|boe:106314343|K16871 4-aminobutyrate---pyruvate transaminase [EC:2.6.1.96] | (RefSeq) gamma-aminobutyrate transaminase POP2, mitochondrial-like	Alanine, aspartate and glutamate metabolism (ko00250);; Butanoate metabolism (ko00650)
gene_Bol023427	gene_Bol023427	--	0.440184	1.75376	1.63278	20.789	17.5032	22.9185	22.936	49.3483	50.6489	3.66867	up	1.48462	up	--	--
gene_Bol023434	gene_Bol023434	LOC106310038	0.113279	0.48366	0.191102	6.49766	4.62885	5.83155	13.454	8.94576	4.21806	4.10044	up	0.979267	up	K13946|1.4e-09|ppp:112289353|K13946 auxin influx carrier (AUX1 LAX family) | (RefSeq) auxin transporter protein 1-like	Plant hormone signal transduction (ko04075)
gene_Bol023452	gene_Bol023452	--	0	0	0	14.3861	12.2361	7.26898	23.7087	31.1713	27.014	9.05657	up	1.69051	up	--	--
gene_Bol023606	gene_Bol023606	LOC106310772	0.053196	0	0	2.34033	3.34047	3.85061	20.5253	19.2688	84.5673	7.20017	up	4.32719	up	--	--
gene_Bol023740	gene_Bol023740	LOC106300119	15.2051	11.9383	11.7227	32.6924	28.7467	36.7623	42.3794	34.0714	51.299	1.03993	up	0.853644	up	K11594|0.0e+00|bna:106428245|K11594 ATP-dependent RNA helicase DDX3X [EC:3.6.4.13] | (RefSeq) DEAD-box ATP-dependent RNA helicase 52	--
gene_Bol023762	gene_Bol023762	LOC106301011	62.1234	57.2586	74.9483	240.633	233.085	248.479	359.718	306.451	265.772	1.59115	up	0.770749	up	K01647|2.7e-291|bna:106428251|K01647 citrate synthase [EC:2.3.3.1] | (RefSeq) citrate synthase 2, peroxisomal isoform X1	Citrate cycle (TCA cycle) (ko00020);; Glyoxylate and dicarboxylate metabolism (ko00630);; Carbon metabolism (ko01200);; 2-Oxocarboxylic acid metabolism (ko01210);; Biosynthesis of amino acids (ko01230)
gene_Bol023783	gene_Bol023783	LOC106428197	1.41264	0.647379	1.51058	9.54166	6.65788	6.42877	6.90729	11.9477	11.5984	2.357	up	0.883724	up	--	--
gene_Bol023809	gene_Bol023809	LOC106405595	0.320507	0.447534	0.21628	4.54151	3.40109	3.25216	6.48781	4.18738	9.50343	3.14943	up	1.35992	up	K22133|9.4e-63|egr:104443798|K22133 oxalate---CoA ligase [EC:6.2.1.8] | (RefSeq) oxalate--CoA ligase	Glyoxylate and dicarboxylate metabolism (ko00630)
gene_Bol023861	gene_Bol023861	--	0.515805	1.28359	0.720236	2.74677	2.63056	1.68457	15.3826	7.42329	41.7953	1.16786	up	3.7846	up	K15014|1.9e-08|qsu:112035105|K15014 solute carrier family 29 (equilibrative nucleoside transporter), member 1/2/3 | (RefSeq) equilibrative nucleotide transporter 3-like	--
gene_Bol023862	gene_Bol023862	--	2.04988	3.34351	2.30991	21.7462	21.6785	20.1767	35.2492	25.9377	32.608	2.74088	up	0.999351	up	--	--
gene_Bol023866	gene_Bol023866	LOC106381491	0	0	0	2.22944	3.04181	0.827551	3.16228	5.90865	4.1116	9.04417	up	1.51222	up	K16225|1.9e-46|crb:17875137|K16225 probable WRKY transcription factor 52 | (RefSeq) disease resistance protein RRS1	Plant-pathogen interaction (ko04626)
gene_Bol023868	gene_Bol023868	LOC106436202	0.791559	0.589452	0.382004	11.3758	13.1367	5.63823	23.7436	20.1695	20.3184	3.80652	up	1.50482	up	K16226|3.2e-115|bna:106416466|K16226 disease resistance protein RPS4 | (RefSeq) disease resistance protein RPS4-like	Plant-pathogen interaction (ko04626)
gene_Bol023890	gene_Bol023890	LOC106404953	0	0	0	4.34655	3.24949	1.74594	9.08135	8.00146	11.9178	8.99864	up	2.10313	up	K18834|3.5e-17|cmo:103500526|K18834 WRKY transcription factor 1 | (RefSeq) WRKY transcription factor 1	Plant-pathogen interaction (ko04626)
gene_Bol023988	gene_Bol023988	LOC106296675	18.8925	17.0661	13.0881	144.582	121.093	154.663	166.221	176.649	146.113	2.80189	up	0.630902	up	K11498|7.3e-09|gab:108460677|K11498 centromeric protein E | (RefSeq) kinesin-like protein KIN-7D, mitochondrial	--
gene_Bol023997	gene_Bol023997	LOC106300133	1.19741	1.10845	2.07229	14.9089	10.8913	11.6871	19.6214	20.7826	21.8314	2.78737	up	1.17443	up	K01530|0.0e+00|boe:106300133|K01530 phospholipid-translocating ATPase [EC:7.6.2.1] | (RefSeq) putative phospholipid-transporting ATPase 9	--
gene_Bol024034	gene_Bol024034	LOC106298940	0.909537	0.544672	0.987596	4.09984	4.97752	3.1363	19.309	6.75112	29.7593	2.01822	up	2.72808	up	K09775|3.0e-09|dzi:111283728|K09775 uncharacterized protein | (RefSeq) uncharacterized protein LOC111283728 isoform X1	--
gene_Bol024280	gene_Bol024280	LOC106306508	4.31577	5.72901	2.93649	88.8181	104.075	114.57	258.573	182.991	265.641	4.25533	up	1.65775	up	K08341|8.7e-63|boe:106306508|K08341 GABA(A) receptor-associated protein | (RefSeq) autophagy-related protein 8a isoform X1	Autophagy - other (ko04136)
gene_Bol024291	gene_Bol024291	LOC106304480	0.591079	0.273294	0.400193	9.50091	15.8687	8.41232	26.1361	27.0762	35.2187	4.34202	up	1.84593	up	--	--
gene_Bol024313	gene_Bol024313	LOC106301490	15.3149	9.13282	9.44187	38.219	44.8498	33.7273	40.6362	50.5398	61.0735	1.50011	up	0.8493	up	K12486|1.4e-190|boe:106301490|K12486 stromal membrane-associated protein | (RefSeq) ADP-ribosylation factor GTPase-activating protein AGD12-like isoform X1	Endocytosis (ko04144)
gene_Bol024329	gene_Bol024329	--	93.5185	88.7403	82.4812	219.219	199.261	201.329	227.804	281.199	279.633	0.930306	up	0.791517	up	K01280|0.0e+00|boe:106303335|K01280 tripeptidyl-peptidase II [EC:3.4.14.10] | (RefSeq) tripeptidyl-peptidase 2	--
gene_Bol024360	gene_Bol024360	LOC106421192	6.50548	5.1404	9.93777	72.5187	69.3502	73.7903	144.726	121.324	188.076	3.01231	up	1.55427	up	K22389|0.0e+00|bna:106421192|K22389 phospholipase A1 [EC:3.1.1.32] | (RefSeq) lecithin-cholesterol acyltransferase-like 4	Glycerophospholipid metabolism (ko00564);; alpha-Linolenic acid metabolism (ko00592)
gene_Bol024393	gene_Bol024393	LOC106301547	3.19736	2.48802	2.45357	15.8102	16.7624	14.4435	18.1515	16.9634	18.498	2.23439	up	0.624336	up	--	--
gene_Bol024395	gene_Bol024395	LOC106304762	0.216156	0.288721	0.491967	7.6421	9.87946	3.61319	25.4651	13.3888	58.0198	3.99646	up	2.76609	up	K08235|8.5e-90|bna:106405205|K08235 xyloglucan:xyloglucosyl transferase [EC:2.4.1.207] | (RefSeq) probable xyloglucan endotransglucosylase/hydrolase protein 29 isoform X1	--
gene_Bol024435	gene_Bol024435	LOC103860992	0.476997	0.858136	0.673428	61.5314	79.5266	40.8487	102.826	82.8679	166.386	6.17953	up	1.45832	up	K07904|1.6e-104|bna:106372993|K07904 Ras-related protein Rab-11A | (RefSeq) ras-related protein RABA1e	Endocytosis (ko04144)
gene_Bol024497	gene_Bol024497	--	8.14383	7.6538	6.66174	28.3174	26.152	26.5401	27.8757	32.1188	30.6916	1.55431	up	0.596738	up	K18460|0.0e+00|boe:106326984|K18460 exportin-7 | (RefSeq) exportin-7-like isoform X1	--
gene_Bol024590	gene_Bol024590	--	3.41577	2.87125	3.25621	18.1645	18.1537	17.1226	25.2079	25.19	29.8431	2.1853	up	1.03936	up	K18081|6.2e-11|bna:106425271|K18081 myotubularin-related protein 1/2 [EC:3.1.3.64 3.1.3.95] | (RefSeq) phosphatidylinositol-3-phosphatase myotubularin-2-like	Inositol phosphate metabolism (ko00562);; Phosphatidylinositol signaling system (ko04070)
gene_Bol024689	gene_Bol024689	--	4.93606	3.76569	1.41838	8.83239	17.8093	12.3768	18.1145	17.4782	17.1337	1.65783	up	0.851079	up	K14488|6.2e-79|boe:106326199|K14488 SAUR family protein | (RefSeq) auxin-responsive protein SAUR22-like	Plant hormone signal transduction (ko04075)
gene_Bol024701	gene_Bol024701	LOC106326730	0	0	0.078287	10.5349	10.5846	3.78401	67.1475	16.387	73.2439	7.80216	up	3.15601	up	K05387|5.0e-172|boe:106326730|K05387 glutamate receptor, ionotropic, plant | (RefSeq) glutamate receptor 2.5-like isoform X1	--
gene_Bol024863	gene_Bol024863	LOC106352721	124.791	195.928	310.062	545.457	649.621	415.758	1299.06	1505.46	2080.99	1.0434	up	2.08172	up	K01953|0.0e+00|bna:106352721|K01953 asparagine synthase (glutamine-hydrolysing) [EC:6.3.5.4] | (RefSeq) asparagine synthetase [glutamine-hydrolyzing]	Alanine, aspartate and glutamate metabolism (ko00250);; Biosynthesis of amino acids (ko01230)
gene_Bol024864	gene_Bol024864	LOC106352721	166.689	237.726	405.411	683.873	776.175	559.36	1560.63	1890.27	2451.38	1.00771	up	2.02333	up	K01953|0.0e+00|bna:106352721|K01953 asparagine synthase (glutamine-hydrolysing) [EC:6.3.5.4] | (RefSeq) asparagine synthetase [glutamine-hydrolyzing]	Alanine, aspartate and glutamate metabolism (ko00250);; Biosynthesis of amino acids (ko01230)
gene_Bol024871	gene_Bol024871	LOC106335845	8.89476	17.0328	10.906	107.595	110.507	130.691	184.64	170.46	122.112	2.9353	up	0.837406	up	K13783|8.6e-293|boe:106335845|K13783 MFS transporter, OPA family, solute carrier family 37 (glycerol-3-phosphate transporter), member 1/2 | (RefSeq) putative glycerol-3-phosphate transporter 1	--
gene_Bol024911	gene_Bol024911	LOC106336012	18.7537	28.4423	33.4082	189.837	190.394	170.647	384.88	279.87	575.236	2.46445	up	1.67795	up	K05643|3.6e-76|han:110885555|K05643 ATP-binding cassette, subfamily A (ABC1), member 3 | (RefSeq) ABC transporter A family member 1 isoform X1	ABC transporters (ko02010)
gene_Bol024977	gene_Bol024977	LOC106335947	12.0212	12.0339	11.8458	29.029	27.1059	23.6512	48.617	28.1492	32.5676	0.854042	up	0.864881	up	K15168|0.0e+00|bna:106361923|K15168 mediator of RNA polymerase II transcription subunit 25 | (RefSeq) mediator of RNA polymerase II transcription subunit 25-like isoform X1	--
gene_Bol024996	gene_Bol024996	LOC106388175	99.1327	124.236	243.812	517.82	611.111	534.048	725.812	797.195	678.357	1.51863	up	0.818204	up	K00232|1.6e-166|bna:106388175|K00232 acyl-CoA oxidase [EC:1.3.3.6] | (RefSeq) acyl-coenzyme A oxidase 4, peroxisomal	Fatty acid degradation (ko00071);; beta-Alanine metabolism (ko00410);; alpha-Linolenic acid metabolism (ko00592);; Propanoate metabolism (ko00640);; Biosynthesis of unsaturated fatty acids (ko01040);; Carbon metabolism (ko01200);; Fatty acid metabolism (ko01212);; Peroxisome (ko04146)
gene_Bol025018	gene_Bol025018	--	3.79994	3.18439	3.15818	12.3961	9.67297	10.6845	13.9124	12.5206	12.2689	1.3922	up	0.662574	up	K18046|4.8e-78|smo:SELMODRAFT_447369|K18046 tyrosine-protein phosphatase OCA6 [EC:3.1.3.48] | (RefSeq) hypothetical protein	--
gene_Bol025130	gene_Bol025130	LOC106312470	0.124802	0.287287	0.18705	4.06189	3.88976	3.29572	4.04695	4.2623	4.28854	3.86181	up	0.595746	up	--	--
gene_Bol025174	gene_Bol025174	LOC103841328	28.67	35.2991	34.5952	194.812	194.442	157.667	240.78	253.273	371.939	2.17162	up	1.14906	up	K15103|1.2e-174|bna:106411669|K15103 solute carrier family 25 (mitochondrial uncoupling protein), member 8/9 | (RefSeq) mitochondrial uncoupling protein 1-like	--
gene_Bol025188	gene_Bol025188	--	8.99345	7.89109	7.52472	18.6018	16.9224	16.5603	19.8009	20.6828	20.2044	0.797801	up	0.651301	up	K15192|0.0e+00|boe:106311626|K15192 TATA-binding protein-associated factor [EC:3.6.4.-] | (RefSeq) TATA-binding protein-associated factor BTAF1	--
gene_Bol025231	gene_Bol025231	LOC106336541	0.237072	0	1.01474	7.95273	6.71559	8.7757	9.02741	53.3395	23.9568	3.8572	up	2.27588	up	K17500|3.0e-45|nto:104085001|K17500 integrin-linked kinase-associated serine/threonine phosphatase 2C [EC:3.1.3.16] | (RefSeq) WAT1-related protein At3g18200 isoform X1	--
gene_Bol025232	gene_Bol025232	LOC103865602	8.43445	3.13506	18.8003	220.918	210.284	94.9573	300.668	352.292	247.17	3.8068	up	1.16449	up	--	--
gene_Bol025298	gene_Bol025298	LOC106342988	1.82918	1.53272	2.97175	12.6633	6.21247	7.85795	45.9766	28.5769	73.0132	1.75836	up	2.98858	up	--	--
gene_Bol025312	gene_Bol025312	--	1.6165	2.66577	1.64639	30.6578	21.512	26.9535	51.639	67.5295	101.565	3.42686	up	1.98807	up	K17623|9.6e-08|qsu:111991255|K17623 pseudouridine 5'-phosphatase [EC:3.1.3.96] | (RefSeq) putative uncharacterized hydrolase C1020.07	--
gene_Bol025320	gene_Bol025320	LOC106336875	7.36329	8.71183	6.63709	15.5916	15.7277	13.5017	20.3984	16.2931	26.7483	0.683216	up	0.982258	up	--	--
gene_Bol025322	gene_Bol025322	--	0.171385	0.135754	0.070491	1.01029	1.07914	1.5473	1.4138	3.53714	4.95862	2.85148	up	1.95838	up	K16275|6.3e-195|bna:106402713|K16275 E3 ubiquitin-protein ligase BAH [EC:2.3.2.27] | (RefSeq) probable E3 ubiquitin-protein ligase BAH1-like isoform X2	--
gene_Bol025346	gene_Bol025346	--	27.5794	18.0914	46.3761	109.342	97.7969	54.8051	360.686	133.993	543.176	1.20582	up	2.52578	up	--	--
gene_Bol025378	gene_Bol025378	LOC106337371	28.9907	39.3965	39.8488	70.168	69.3594	70.1172	96.1783	91.7828	123.332	0.648525	up	1.0386	up	K13354|3.6e-183|boe:106337371|K13354 solute carrier family 25 (peroxisomal adenine nucleotide transporter), member 17 | (RefSeq) peroxisomal nicotinamide adenine dinucleotide carrier	Peroxisome (ko04146)
gene_Bol025385	gene_Bol025385	--	2.072	2.44693	1.79435	15.2089	16.8653	13.8152	53.8828	43.1292	65.5023	2.55904	up	2.2936	up	K08915|6.1e-101|eus:EUTSA_v10017060mg|K08915 light-harvesting complex II chlorophyll a/b binding protein 4 | (RefSeq) hypothetical protein	Photosynthesis - antenna proteins (ko00196)
gene_Bol025399	gene_Bol025399	LOC106401241	75.6668	77.7692	83.9001	174.341	163.408	134.085	193.546	208.51	252.202	0.692597	up	0.932354	up	K00924|5.4e-26|bvg:104888476|K00924 kinase [EC:2.7.1.-] | (RefSeq) receptor protein kinase CLAVATA1	--
gene_Bol025414	gene_Bol025414	LOC106336743	23.7218	22.6231	40.4614	142.535	146.58	125.596	226.952	200.911	298.05	1.94985	up	1.28337	up	K14207|3.7e-103|mus:103996361|K14207 solute carrier family 38 (sodium-coupled neutral amino acid transporter), member 2 | (RefSeq) probable sodium-coupled neutral amino acid transporter 6	--
gene_Bol025436	gene_Bol025436	LOC106394643	1.44838	1.19491	1.22948	3.28476	4.11561	2.60076	4.11262	5.63125	3.50303	1.06105	up	0.79264	up	K09286|1.0e-41|dzi:111280955|K09286 EREBP-like factor | (RefSeq) ethylene-responsive transcription factor TINY-like	--
gene_Bol025549	gene_Bol025549	LOC106391621	7.52698	3.73281	5.43165	19.8791	18.8416	19.9483	24.4992	20.5555	24.5042	1.52107	up	0.688448	up	K24221|1.1e-95|lsv:111907353|K24221 type I inositol polyphosphate 5-phosphatase IP5P1/2 [EC:3.1.3.56] | (RefSeq) type I inositol polyphosphate 5-phosphatase 2-like isoform X1	Inositol phosphate metabolism (ko00562)
gene_Bol025649	gene_Bol025649	LOC106329023	4.73883	5.37039	4.43164	14.2395	11.7426	9.4181	18.8297	10.5944	28.5846	0.98492	up	1.23587	up	K24221|1.3e-217|aly:9329872|K24221 type I inositol polyphosphate 5-phosphatase IP5P1/2 [EC:3.1.3.56] | (RefSeq) type I inositol polyphosphate 5-phosphatase 1 isoform X1	Inositol phosphate metabolism (ko00562)
gene_Bol025759	gene_Bol025759	LOC106385794	1.45829	0.735329	0.752421	58.1015	64.8378	44.9676	184.838	97.8387	164.604	5.53731	up	1.86288	up	K00521|2.4e-42|cmos:111447866|K00521 ferric-chelate reductase [EC:1.16.1.7] | (RefSeq) ferric reduction oxidase 7, chloroplastic-like	--
gene_Bol025939	gene_Bol025939	--	170.418	201.501	370.061	775.754	717.255	728.188	957.548	982.074	680.328	1.26834	up	0.62478	up	K08678|3.6e-199|bna:106436074|K08678 UDP-glucuronate decarboxylase [EC:4.1.1.35] | (RefSeq) UDP-glucuronic acid decarboxylase 3	Amino sugar and nucleotide sugar metabolism (ko00520)
gene_Bol025984	gene_Bol025984	LOC106335370	1.17732	1.12224	0.529438	19.6076	18.3525	15.2555	22.4033	19.9955	31.3857	3.93653	up	0.955603	up	K08867|2.0e-305|boe:106335370|K08867 WNK lysine deficient protein kinase [EC:2.7.11.1] | (RefSeq) probable serine/threonine-protein kinase WNK4	--
gene_Bol026031	gene_Bol026031	LOC106333416	0.619043	0.725314	0.720854	7.64857	7.21416	5.14219	9.85062	10.3801	9.71683	2.94491	up	1.0012	up	--	--
gene_Bol026082	gene_Bol026082	LOC106296684	6.47721	6.91777	8.55564	25.6352	21.0483	22.9086	36.359	29.412	43.6989	1.35915	up	1.1254	up	--	--
gene_Bol026088	gene_Bol026088	--	31.7491	49.5438	49.7077	263.508	216.79	196.959	417.539	355.073	273.856	2.06244	up	1.01588	up	--	--
gene_Bol026144	gene_Bol026144	--	1.08763	2.11766	2.63372	5.8312	5.40818	4.84203	8.95564	8.14315	9.11265	1.14287	up	1.14131	up	K10643|3.8e-10|lja:Lj5g3v0616120.4|K10643 CCR4-NOT transcription complex subunit 4 [EC:2.3.2.27] | (RefSeq) Lj5g3v0616120.4; -	RNA degradation (ko03018)
gene_Bol026200	gene_Bol026200	LOC106296616	250.652	72.3726	90.8769	490.296	472.151	292.398	484.29	471.45	696.592	1.33137	up	0.877129	up	K11821|7.7e-202|boe:106296616|K11821 aromatic desulfoglucosinolate sulfotransferase [EC:2.8.2.24] | (RefSeq) cytosolic sulfotransferase 16-like	Tryptophan metabolism (ko00380);; Glucosinolate biosynthesis (ko00966);; 2-Oxocarboxylic acid metabolism (ko01210)
gene_Bol026204	gene_Bol026204	--	1.94241	0.912169	1.16723	28.2992	35.8557	10.6971	83.4632	73.8556	142.801	3.93303	up	2.50764	up	K09422|1.1e-186|boe:106298877|K09422 transcription factor MYB, plant | (RefSeq) transcription factor MYB122-like	--
gene_Bol026483	gene_Bol026483	--	0.68057	0.424342	0.432176	5.39794	2.8484	4.37416	9.23218	12.7739	9.99573	2.707	up	1.76222	up	K10728|1.6e-07|dcr:108214466|K10728 topoisomerase (DNA) II binding protein 1 | (RefSeq) DNA topoisomerase 2-binding protein 1-A	Homologous recombination (ko03440)
gene_Bol026530	gene_Bol026530	--	0.667632	0.71702	0.797003	10.3795	10.4294	4.1692	39.4919	19.7666	56.7815	3.22182	up	2.73176	up	--	--
gene_Bol026592	gene_Bol026592	LOC106336265	4.39229	5.58135	6.7494	47.2672	42.641	45.1191	107.537	67.1925	76.3715	2.705	up	1.31036	up	K22950|1.2e-88|fve:101295404|K22950 acylphloroglucinol glucosyltransferase [EC:2.4.1.358] | (RefSeq) anthocyanidin 3-O-glucosyltransferase 2-like	--
gene_Bol026598	gene_Bol026598	LOC106332746	0	0.21303	0.301211	12.7265	13.924	14.4958	20.6048	39.8932	14.2458	5.9599	up	1.20162	up	--	--
gene_Bol026699	gene_Bol026699	LOC106328771	38.8214	30.4154	30.9719	143.013	158.478	159.261	214.856	345.404	314.066	1.90672	up	1.36903	up	--	--
gene_Bol026719	gene_Bol026719	LOC106301065	5.24537	8.75798	7.48984	15.1645	15.3607	14.5257	20.2528	14.6484	17.7447	0.761736	up	0.656833	up	K19041|1.0e-96|thj:104810450|K19041 E3 ubiquitin-protein ligase RNF38/44 [EC:2.3.2.27] | (RefSeq) uncharacterized protein LOC104810450	--
gene_Bol026772	gene_Bol026772	LOC106296798	1.9655	2.75411	1.6981	24.3599	19.7827	19.6212	24.0631	28.769	22.2714	2.99381	up	0.64275	up	--	--
gene_Bol026829	gene_Bol026829	LOC106397887	1.31102	0.992212	1.74493	27.9749	27.4016	16.9137	88.7583	59.8821	118.943	3.84221	up	2.38137	up	K20506|2.9e-73|egu:105060863|K20506 tuliposide A-converting enzyme [EC:4.2.99.22] | (RefSeq) tuliposide A-converting enzyme 2, chloroplastic-like	--
gene_Bol026830	gene_Bol026830	LOC106397671	1.67239	1.60474	5.35828	81.3039	78.4842	96.5874	116.423	119.952	82.0723	4.56478	up	0.699475	up	--	--
gene_Bol026834	gene_Bol026834	--	9.02514	8.61886	8.73513	25.4373	20.9492	17.9519	56.4225	43.2218	38.3074	0.988843	up	1.49787	up	K14486|0.0e+00|jcu:105638003|K14486 auxin response factor | (RefSeq) auxin response factor 19 isoform X1	Plant hormone signal transduction (ko04075)
gene_Bol026871	gene_Bol026871	--	38.2985	32.2366	72.0241	247.29	228.867	274.359	498.676	336.732	157.767	2.08322	up	0.729751	up	--	--
gene_Bol026879	gene_Bol026879	--	59.2107	54.7414	58.2379	212.602	214.751	246.759	319.947	294.592	181.113	1.66888	up	0.606791	up	K08999|3.6e-31|ppp:112285264|K08999 uncharacterized protein | (RefSeq) bifunctional nuclease 2-like	--
gene_Bol026885	gene_Bol026885	LOC106295763	6.95205	5.46241	4.85918	31.2065	36.2494	33.7072	45.2629	47.0313	30.0907	2.24936	up	0.649956	up	K03671|2.5e-62|bna:106415252|K03671 thioredoxin 1 | (RefSeq) thioredoxin H-type 2-like	--
gene_Bol026887	gene_Bol026887	LOC106343772	25.7812	19.3596	16.7201	48.7217	41.9786	37.0009	60.3995	58.2448	62.273	0.754647	up	0.939339	up	--	--
gene_Bol026933	gene_Bol026933	LOC106293367	0.092077	0.710559	0.260733	5.4267	9.42022	5.67065	25.5299	31.0336	137.45	3.89656	up	3.87201	up	--	--
gene_Bol026967	gene_Bol026967	LOC111211011	0.941015	1.26356	2.12343	4.50081	6.77864	6.42193	7.86533	9.87923	8.67067	1.71926	up	0.999197	up	K23280|2.1e-87|nau:109214571|K23280 rhamnogalacturonan I rhamnosyltransferase [EC:2.4.1.351] | (RefSeq) uncharacterized protein At1g04910	--
gene_Bol026976	gene_Bol026976	LOC106294843	4.10237	3.45405	2.89732	33.0073	31.4503	33.8967	80.559	44.4608	53.9086	2.93477	up	1.27717	up	--	--
gene_Bol027026	gene_Bol027026	LOC106312197	3.00287	1.54189	2.49903	4.39077	4.82844	5.02423	6.37003	4.90613	5.08564	0.717962	up	0.610946	up	K17604|6.7e-30|pop:7478873|K17604 zinc finger SWIM domain-containing protein 3 | (RefSeq) uncharacterized protein LOC7478873 isoform X1	--
gene_Bol027076	gene_Bol027076	LOC106444075	17.9352	7.89496	9.58592	33.7879	34.6535	27.8458	53.0785	42.7781	42.3037	1.16155	up	0.933862	up	K03549|0.0e+00|bna:106444075|K03549 KUP system potassium uptake protein | (RefSeq) potassium transporter 10-like isoform X2	--
gene_Bol027086	gene_Bol027086	LOC103833815	11.2909	17.6048	9.42799	35.8612	36.5934	35.7929	59.8583	44.5474	47.6413	1.19821	up	0.907143	up	K12158|5.8e-80|bna:106400214|K12158 ubiquitin-like protein Nedd8 | (RefSeq) ubiquitin-NEDD8-like protein RUB2	--
gene_Bol027093	gene_Bol027093	--	7.14528	7.83189	5.66687	16.864	14.313	14.0492	17.2042	16.6585	18.2337	0.834636	up	0.645129	up	K13619|5.7e-10|cme:CYME_CMP267C|K13619 phospholipase DDHD1 [EC:3.1.1.-] | (RefSeq) similar to phosphatidic acid-preferring phospholipase A1	--
gene_Bol027110	gene_Bol027110	LOC103827967	2.86431	0.196055	0.151436	260.135	211.384	50.2402	1764.68	1001.81	1898.96	6.96768	up	3.63014	up	K20769|5.5e-07|mesc:110611169|K20769 fatty acid omega-hydroxylase [EC:1.14.-.-] | (RefSeq) cytochrome P450 94A2-like	Cutin, suberine and wax biosynthesis (ko00073)
gene_Bol027209	gene_Bol027209	LOC106305678	0	0	0.032882	1.94356	2.32437	2.64266	3.47002	6.90385	4.05207	6.50219	up	1.45183	up	K13944|1.1e-27|sly:101261338|K13944 LOB domain-containing protein 16 | (RefSeq) LOB domain-containing protein 16	--
gene_Bol027234	gene_Bol027234	LOC106307037	10.2239	5.72477	13.7986	72.1936	89.5103	101.308	165.834	151.539	118.256	2.8387	up	1.12138	up	--	--
gene_Bol027273	gene_Bol027273	LOC106351550	3.17821	3.20685	2.32732	128.84	89.3277	57.2486	180.353	217.041	109.608	4.67646	up	1.2375	up	K00521|2.7e-30|cmos:111447866|K00521 ferric-chelate reductase [EC:1.16.1.7] | (RefSeq) ferric reduction oxidase 7, chloroplastic-like	--
gene_Bol027287	gene_Bol027287	--	2.55421	1.59056	4.57318	25.7532	28.1334	18.3052	32.5481	33.54	55.53	2.7363	up	1.25034	up	K12900|2.2e-24|lang:109341833|K12900 FUS-interacting serine-arginine-rich protein 1 | (RefSeq) serine/arginine-rich SC35-like splicing factor SCL30A	Spliceosome (ko03040)
gene_Bol027308	gene_Bol027308	--	0	0	0	15.6947	9.01761	8.60057	19.019	25.0516	8.19106	9.50606	up	0.975741	up	K19038|2.2e-79|boe:106341321|K19038 E3 ubiquitin-protein ligase ATL41 [EC:2.3.2.27] | (RefSeq) RING-H2 finger protein ATL40-like	--
gene_Bol027309	gene_Bol027309	--	0	0	0	4.57809	3.6713	3.03345	6.84267	8.23177	2.40604	7.9368	up	0.953523	up	K19038|1.6e-85|bna:106454747|K19038 E3 ubiquitin-protein ligase ATL41 [EC:2.3.2.27] | (RefSeq) E3 ubiquitin-protein ligase ATL41	--
gene_Bol027320	gene_Bol027320	LOC106342528	3.06305	8.52782	10.5395	25.9105	70.3252	13.9918	92.9926	44.9354	123.587	2.01867	up	1.74137	up	K07198|6.4e-141|atr:18425660|K07198 5'-AMP-activated protein kinase, catalytic alpha subunit [EC:2.7.11.11] | (RefSeq) CBL-interacting protein kinase 5	--
gene_Bol027351	gene_Bol027351	LOC106396203	18.2275	16.2236	24.1214	104.044	104.459	37.5773	144.779	148.22	344.883	1.77646	up	1.91826	up	K09832|6.3e-293|bna:106396203|K09832 sterol 22-desaturase [EC:1.14.19.41] | (RefSeq) cytochrome P450 710A1	Steroid biosynthesis (ko00100)
gene_Bol027415	gene_Bol027415	BNAC04G10200D	1.23962	1.30833	1.31573	4.4478	2.86027	1.5877	4.02162	4.89862	9.38947	0.906238	up	1.56879	up	K10638|4.1e-19|psom:113308475|K10638 E3 ubiquitin-protein ligase UHRF1 [EC:2.3.2.27] | (RefSeq) uncharacterized protein LOC113308475	--
gene_Bol027425	gene_Bol027425	--	0	0	0	0.52189	0.252814	0.799046	1.48965	1.73044	0.304507	8.64214	up	1.44554	up	K02365|0.0e+00|boe:106343049|K02365 separase [EC:3.4.22.49] | (RefSeq) separase-like isoform X1	--
gene_Bol027456	gene_Bol027456	LOC106396097	1.3095	0.702367	0.581587	5.06061	4.63701	5.32593	9.25996	3.94299	8.25812	2.24214	up	0.978886	up	K23544|3.1e-94|brp:103842861|K23544 serine incorporator 1/3 | (RefSeq) serine incorporator 3	--
gene_Bol027483	gene_Bol027483	--	10.3701	4.01363	10.739	27.2441	24.1054	26.2484	27.1634	38.7554	41.331	1.32375	up	0.926407	up	--	--
gene_Bol027526	gene_Bol027526	--	11.4046	12.2449	13.4687	44.1017	37.2061	48.0997	45.087	50.0954	72.7182	1.49597	up	0.868033	up	K14431|3.6e-194|bna:106354586|K14431 transcription factor TGA | (RefSeq) transcription factor TGA7-like	Plant hormone signal transduction (ko04075)
gene_Bol027549	gene_Bol027549	--	66.7778	111.908	106.773	305.359	218.506	321.552	817.454	334.577	254.903	1.2528	up	1.07872	up	K09580|1.5e-286|bna:106354602|K09580 protein disulfide-isomerase A1 [EC:5.3.4.1] | (RefSeq) protein disulfide isomerase-like 1-2	Protein processing in endoplasmic reticulum (ko04141)
gene_Bol027550	gene_Bol027550	LOC106299067	0.373185	1.83907	1.02645	18.034	20.1911	5.91229	40.4598	26.227	52.7139	3.45646	up	1.92193	up	K07192|3.0e-236|bna:106354603|K07192 flotillin | (RefSeq) flotillin-like protein 3	--
gene_Bol027566	gene_Bol027566	--	1.62814	1.16158	1.20831	12.8414	10.2793	12.6267	11.9123	19.0902	14.0355	2.85915	up	0.7516	up	K13430|1.2e-87|nta:107764193|K13430 serine/threonine-protein kinase PBS1 [EC:2.7.11.1] | (RefSeq) serine/threonine-protein kinase PBS1-like	Plant-pathogen interaction (ko04626)
gene_Bol027596	gene_Bol027596	LOC106296217	11.5025	10.5561	8.37264	21.0395	19.163	24.1487	30.4852	24.6307	58.253	0.783321	up	1.35428	up	K19600|3.9e-44|mis:MICPUN_63330|K19600 tubby-related protein 1 | (RefSeq) tubby-like protein	--
gene_Bol027639	gene_Bol027639	LOC106300030	4.84702	5.68537	5.03289	10.767	8.30292	10.0647	12.4471	10.0746	10.83	0.600117	up	0.6229	up	K08332|5.6e-49|ccaj:109805896|K08332 vacuolar protein 8 | (RefSeq) U-box domain-containing protein 44-like	--
gene_Bol027786	gene_Bol027786	LOC106337490	43.6594	39.4436	35.6088	83.9616	73.8851	86.5809	108.324	110.831	110.152	0.744014	up	0.863143	up	K02727|4.4e-138|boe:106337490|K02727 20S proteasome subunit alpha 7 [EC:3.4.25.1] | (RefSeq) proteasome subunit alpha type-3	Proteasome (ko03050)
gene_Bol027792	gene_Bol027792	--	19.3042	20.2442	18.0649	35.512	34.634	38.475	48.6699	39.5499	38.6612	0.615421	up	0.63845	up	--	--
gene_Bol027861	gene_Bol027861	--	18.1458	15.2184	14.3558	36.2275	30.2076	36.5248	41.5805	42.2963	36.041	0.811998	up	0.63343	up	K00454|0.0e+00|boe:106300336|K00454 lipoxygenase [EC:1.13.11.12] | (RefSeq) lipoxygenase 6, chloroplastic	Linoleic acid metabolism (ko00591);; alpha-Linolenic acid metabolism (ko00592)
gene_Bol027878	gene_Bol027878	LOC106331759	3.69945	1.48253	1.11386	30.6629	28.7594	34.3991	48.7301	42.8912	40.3904	3.61211	up	0.908399	up	K13148|5.7e-25|pop:7459752|K13148 integrator complex subunit 11 [EC:3.1.27.-] | (RefSeq) LOW QUALITY PROTEIN: cleavage and polyadenylation specificity factor subunit 3-II	--
gene_Bol027892	gene_Bol027892	--	3.32324	6.06247	5.56907	15.6281	15.6802	12.9371	16.7348	19.8398	19.4467	1.25697	up	0.777222	up	K01177|1.6e-110|sot:102577806|K01177 beta-amylase [EC:3.2.1.2] | (RefSeq) beta-amylase PCT-BMYI	Starch and sucrose metabolism (ko00500)
gene_Bol027924	gene_Bol027924	--	0	0.073611	0.137654	2.91757	2.41648	1.50506	4.42881	6.64071	4.6251	4.59381	up	1.59808	up	K18270|0.0e+00|bna:106351071|K18270 Rab3 GTPase-activating protein catalytic subunit | (RefSeq) rab3 GTPase-activating protein catalytic subunit-like isoform X1	--
gene_Bol027934	gene_Bol027934	--	1.89825	0.911585	1.4174	23.7403	20.3306	17.7504	30.0609	23.3598	40.9633	3.56381	up	1.09943	up	K15283|3.6e-211|boe:106329249|K15283 solute carrier family 35, member E1 | (RefSeq) glucose-6-phosphate/phosphate translocator 1, chloroplastic-like	--
gene_Bol027935	gene_Bol027935	--	1.67564	1.47496	1.26811	4.51967	4.53129	5.79934	13.8922	7.82003	18.8222	1.43923	up	1.95696	up	K20168|2.6e-40|ath:AT5G52580|K20168 TBC1 domain family member 15 | (RefSeq) RabGAP/TBC domain-containing protein	--
gene_Bol027947	gene_Bol027947	--	1.11246	0.648311	0.767516	5.62827	5.88395	2.78749	5.75581	7.82861	10.4902	2.20727	up	1.23269	up	K13430|6.7e-57|sly:101261674|K13430 serine/threonine-protein kinase PBS1 [EC:2.7.11.1] | (RefSeq) probable serine/threonine-protein kinase PBL7	Plant-pathogen interaction (ko04626)
gene_Bol028114	gene_Bol028114	--	0.8361	0.932558	0.973942	8.3306	5.83298	7.03514	11.9827	8.99033	8.99875	2.64588	up	0.913369	up	K12857|3.8e-06|crb:17888275|K12857 Prp8 binding protein | (RefSeq) U5 small nuclear ribonucleoprotein 40 kDa protein	Spliceosome (ko03040)
gene_Bol028130	gene_Bol028130	LOC103828528	26.6612	37.0074	37.8637	70.2663	78.0885	92.1401	126.752	79.6821	83.1514	0.936776	up	0.672282	up	--	--
gene_Bol028192	gene_Bol028192	LOC106303832	0.961381	0.853914	0.652902	10.9687	8.91257	7.9464	12.4889	11.7774	12.6905	3.15231	up	0.839039	up	K13456|1.8e-103|boe:106303832|K13456 RPM1-interacting protein 4 | (RefSeq) RPM1-interacting protein 4	Plant-pathogen interaction (ko04626)
gene_Bol028320	gene_Bol028320	--	14.3528	19.6788	20.322	53.0151	49.1179	54.8971	100.498	70.6276	112.947	1.22278	up	1.32603	up	--	--
gene_Bol028336	gene_Bol028336	LOC106376470	704.18	514.725	626.707	2315.5	2289.43	2189.82	3608.47	3531.08	4150.13	1.58527	up	1.18395	up	--	--
gene_Bol028504	gene_Bol028504	LOC106323943	43.7336	34.9826	38.3212	143.997	140.352	141.605	180.981	184.663	169.97	1.56762	up	0.751931	up	K17893|2.2e-199|boe:106323943|K17893 ubiquinol oxidase [EC:1.10.3.11] | (RefSeq) ubiquinol oxidase 4, chloroplastic/chromoplastic	--
gene_Bol028523	gene_Bol028523	--	1.67407	2.25981	2.70821	11.0692	11.9548	9.75114	13.3647	13.5068	13.6648	1.99235	up	0.735943	up	K20456|0.0e+00|bna:106437616|K20456 oxysterol-binding protein 1 | (RefSeq) oxysterol-binding protein-related protein 2A isoform X1	--
gene_Bol028619	gene_Bol028619	LOC106326268	0.501196	0.533426	1.74051	4.19827	3.52891	4.92698	12.0623	6.29544	16.2704	1.78018	up	1.94962	up	--	--
gene_Bol028762	gene_Bol028762	LOC106299037	0.080987	0.230931	0	2.1065	2.09268	2.63977	7.89087	3.19163	7.0114	3.90303	up	1.85591	up	--	--
gene_Bol028763	gene_Bol028763	LOC106316002	5.06283	3.05113	3.6083	17.4761	10.1797	12.4271	24.2173	24.9257	24.921	1.47764	up	1.32193	up	K14509|0.0e+00|boe:106316002|K14509 ethylene receptor [EC:2.7.13.-] | (RefSeq) ethylene receptor 2	MAPK signaling pathway - plant (ko04016);; Plant hormone signal transduction (ko04075)
gene_Bol028800	gene_Bol028800	LOC106304421	139.452	227.77	215.767	502.658	508.678	541.035	541.973	706.173	696.511	1.10493	up	0.770876	up	K01373|5.0e-182|boe:106304421|K01373 cathepsin F [EC:3.4.22.41] | (RefSeq) cysteine proteinase RD19a	Plant-pathogen interaction (ko04626)
gene_Bol028828	gene_Bol028828	LOC106439131	27.9713	22.3084	22.728	79.5041	84.0141	64.1695	134.451	73.3897	356.292	1.34986	up	1.90775	up	K18592|0.0e+00|bna:106439131|K18592 gamma-glutamyltranspeptidase / glutathione hydrolase / leukotriene-C4 hydrolase [EC:2.3.2.2 3.4.19.13 3.4.19.14] | (RefSeq) gamma-glutamyltranspeptidase 1-like isoform X1	Taurine and hypotaurine metabolism (ko00430);; Cyanoamino acid metabolism (ko00460);; Glutathione metabolism (ko00480);; Arachidonic acid metabolism (ko00590)
gene_Bol028852	gene_Bol028852	LOC106302779	50.2901	9.99638	9.9834	147.076	165.182	82.7782	173.784	198.002	222.605	2.23593	up	1.039	up	K11812|0.0e+00|boe:106302779|K11812 tryptophan N-monooxygenase [EC:1.14.14.156] | (RefSeq) cytochrome P450 79B1	Tryptophan metabolism (ko00380);; Glucosinolate biosynthesis (ko00966);; 2-Oxocarboxylic acid metabolism (ko01210)
gene_Bol028861	gene_Bol028861	LOC106294555	1.30717	0.296753	0.517663	13.048	11.245	5.05292	32.7878	23.4815	72.5506	3.50651	up	2.6923	up	--	--
gene_Bol028867	gene_Bol028867	LOC106293386	7.71606	8.93287	7.42188	20.106	21.4535	16.9107	39.4351	26.8676	73.0281	0.983787	up	1.79119	up	K20043|8.3e-77|mtr:MTR_3g086670|K20043 clathrin coat assembly protein AP180 | (RefSeq) clathrin assembly protein	--
gene_Bol028905	gene_Bol028905	LOC106326083	26.7412	38.6921	45.5661	742.899	916.498	542.27	1196.67	1251.49	712.896	4.00787	up	0.88101	up	K00430|1.8e-184|bna:106426871|K00430 peroxidase [EC:1.11.1.7] | (RefSeq) peroxidase 50 isoform X1	Phenylpropanoid biosynthesis (ko00940)
gene_Bol028914	gene_Bol028914	LOC106426783	23.4817	43.9413	23.0953	2444	2321.1	2362.21	2648.88	3583.27	2099.29	5.99687	up	0.606086	up	K00517|4.8e-293|bna:106426783|K00517 indol-3-yl-methylglucosinolate hydroxylase [EC:1.14.-.-] | (RefSeq) cytochrome P450 81F1-like	--
gene_Bol028922	gene_Bol028922	--	0.034129	0.17121	0.071122	1.4699	1.05697	0.804871	8.67948	3.22216	1.51703	3.23917	up	2.30506	up	K13260|2.8e-186|bna:106391411|K13260 isoflavone/4'-methoxyisoflavone 2'-hydroxylase [EC:1.14.14.90 1.14.14.89] | (RefSeq) cytochrome P450 81D11-like	Isoflavonoid biosynthesis (ko00943)
gene_Bol028926	gene_Bol028926	LOC106302516	0	0.096662	0.135588	32.0171	46.7324	21.9969	94.3159	37.9186	124.422	7.82524	up	1.85847	up	--	--
gene_Bol028942	gene_Bol028942	LOC103862975	72.2973	70.9071	143.945	207.145	192.982	197.081	286.817	275.306	215.166	0.744494	up	0.777091	up	K13448|8.4e-80|bna:106438539|K13448 calcium-binding protein CML | (RefSeq) calcium-binding protein CML19	Plant-pathogen interaction (ko04626)
gene_Bol028972	gene_Bol028972	--	0.299316	0.214959	0.2487	0.736177	0.939903	1.46782	1.95707	2.58772	7.35983	1.71172	up	2.50738	up	K01262|0.0e+00|boe:106293166|K01262 Xaa-Pro aminopeptidase [EC:3.4.11.9] | (RefSeq) probable Xaa-Pro aminopeptidase P isoform X1	--
gene_Bol028983	gene_Bol028983	--	14.5118	16.8084	16.8802	36.492	35.7084	35.4244	53.6492	37.1874	42.1544	0.857124	up	0.726866	up	K18647|5.6e-33|bdi:100825997|K18647 acidic leucine-rich nuclear phosphoprotein 32 family member B | (RefSeq) acidic leucine-rich nuclear phosphoprotein 32-related protein 2	--
gene_Bol028995	gene_Bol028995	LOC106313439	45.1494	40.4329	39.0849	84.2375	99.4403	56.1333	171.367	167.591	278.957	0.654521	up	1.86006	up	--	--
gene_Bol029008	gene_Bol029008	LOC106307006	20.5602	10.3177	9.06797	101.025	140.163	72.5267	440.41	276.382	256.561	2.70031	up	2.01595	up	K09755|1.6e-277|boe:106307006|K09755 ferulate-5-hydroxylase [EC:1.14.-.-] | (RefSeq) cytochrome P450 84A1	Phenylpropanoid biosynthesis (ko00940)
gene_Bol029026	gene_Bol029026	LOC106302387	3.61499	3.39766	2.24902	11.3853	10.2879	9.8981	15.3893	12.855	11.3824	1.47761	up	0.731614	up	K08874|0.0e+00|boe:106302387|K08874 transformation/transcription domain-associated protein | (RefSeq) transcription-associated protein 1	--
gene_Bol029174	gene_Bol029174	LOC106310449	0.265459	1.31365	0.814038	146.669	131.061	58.1573	379.989	193.903	525.338	6.81164	up	2.22275	up	K00993|1.6e-110|bna:106453259|K00993 ethanolaminephosphotransferase [EC:2.7.8.1] | (RefSeq) uncharacterized protein LOC106453259	Phosphonate and phosphinate metabolism (ko00440);; Glycerophospholipid metabolism (ko00564);; Ether lipid metabolism (ko00565)
gene_Bol029189	gene_Bol029189	--	4.09176	3.56611	2.77937	9.11751	9.76692	8.03178	11.8406	8.80846	11.7192	1.07539	up	0.71042	up	K08819|7.1e-53|brp:103870946|K08819 cyclin-dependent kinase 12/13 [EC:2.7.11.22 2.7.11.23] | (RefSeq) WRKY58; probable WRKY transcription factor 58	--
gene_Bol029193	gene_Bol029193	--	0	0	0.066952	1.95788	1.80991	1.3863	4.32977	2.54506	6.06986	5.92038	up	1.83414	up	K13681|1.1e-310|bna:106382335|K13681 xyloglucan fucosyltransferase [EC:2.4.1.-] | (RefSeq) fucosyltransferase 6-like isoform X1	--
gene_Bol029233	gene_Bol029233	LOC106366549	3.39091	4.40555	4.46241	12.6139	12.4457	11.5902	17.6345	15.9442	18.4907	1.27429	up	0.949187	up	--	--
gene_Bol029278	gene_Bol029278	LOC106415006	2.16686	2.62604	3.09621	6.40979	5.97112	5.11123	7.29775	7.12023	7.68384	0.843701	up	0.774569	up	K04498|0.0e+00|bna:106415006|K04498 E1A/CREB-binding protein [EC:2.3.1.48] | (RefSeq) histone acetyltransferase HAC12-like	--
gene_Bol029316	gene_Bol029316	--	19.3026	18.3239	12.1362	35.828	40.5923	36.7476	54.7621	40.1761	50.9253	0.895329	up	0.805187	up	K00814|6.1e-266|brp:103835961|K00814 alanine transaminase [EC:2.6.1.2] | (RefSeq) alanine aminotransferase 1, mitochondrial	Arginine biosynthesis (ko00220);; Alanine, aspartate and glutamate metabolism (ko00250);; Carbon fixation in photosynthetic organisms (ko00710);; Carbon metabolism (ko01200);; 2-Oxocarboxylic acid metabolism (ko01210);; Biosynthesis of amino acids (ko01230)
gene_Bol029372	gene_Bol029372	LOC106313784	1.24628	0.451979	1.81443	8.37924	4.84459	8.89594	12.7704	10.396	16.8285	2.33761	up	1.34275	up	K01087|6.2e-192|bna:111198494|K01087 trehalose 6-phosphate phosphatase [EC:3.1.3.12] | (RefSeq) trehalose-phosphate phosphatase A-like	Starch and sucrose metabolism (ko00500)
gene_Bol029434	gene_Bol029434	LOC106388295	1.03829	1.43558	1.11302	30.8449	28.3244	37.4193	57.9172	48.2342	65.7709	4.43927	up	1.29503	up	K17579|4.2e-36|vcn:VOLCADRAFT_98760|K17579 protein phosphatase 1 regulatory subunit 42 | (RefSeq) hypothetical protein	--
gene_Bol029436	gene_Bol029436	LOC106332906	0.652314	2.67884	3.85365	22.9427	32.7414	14.5145	62.2822	20.0559	39.5187	2.96533	up	1.21405	up	K00521|2.8e-45|cmos:111447866|K00521 ferric-chelate reductase [EC:1.16.1.7] | (RefSeq) ferric reduction oxidase 7, chloroplastic-like	--
gene_Bol029445	gene_Bol029445	--	0.817579	0.52883	1.9123	15.4316	10.7058	17.1268	48.0309	5.75681	127.867	3.37984	up	2.71362	up	--	--
gene_Bol029501	gene_Bol029501	LOC106332409	2.01641	4.63587	5.0839	18.0835	18.5425	15.4269	32.1102	19.4624	30.376	1.8357	up	1.107	up	K01265|1.5e-226|bna:106388356|K01265 methionyl aminopeptidase [EC:3.4.11.18] | (RefSeq) methionine aminopeptidase 2A-like	--
gene_Bol029509	gene_Bol029509	LOC106328208	43.0999	37.915	42.1159	87.8711	102.287	82.6494	103.635	98.5308	161.293	0.852716	up	0.907463	up	K01647|1.2e-277|bna:106388350|K01647 citrate synthase [EC:2.3.3.1] | (RefSeq) citrate synthase 4, mitochondrial-like	Citrate cycle (TCA cycle) (ko00020);; Glyoxylate and dicarboxylate metabolism (ko00630);; Carbon metabolism (ko01200);; 2-Oxocarboxylic acid metabolism (ko01210);; Biosynthesis of amino acids (ko01230)
gene_Bol029571	gene_Bol029571	LOC106332161	14.4026	12.3884	11.2291	29.4919	24.2585	25.4612	32.6704	32.6043	27.3098	0.763602	up	0.634099	up	K11647|0.0e+00|boe:106341267|K11647 SWI/SNF-related matrix-associated actin-dependent regulator of chromatin subfamily A member 2/4 [EC:3.6.4.-] | (RefSeq) ATP-dependent helicase BRM-like isoform X1	--
gene_Bol029572	gene_Bol029572	LOC106429623	22.7508	39.7291	32.4863	61.6407	57.516	74.7916	75.9065	72.045	69.616	0.720196	up	0.590227	up	K10576|8.7e-96|bna:106429623|K10576 ubiquitin-conjugating enzyme E2 H [EC:2.3.2.23] | (RefSeq) ubiquitin-conjugating enzyme E2 6	Ubiquitin mediated proteolysis (ko04120)
gene_Bol029617	gene_Bol029617	LOC106386318	0	0.452353	0.322262	17.0265	12.2406	22.5365	65.5791	8.06377	46.797	5.52093	up	1.68875	up	--	--
gene_Bol029886	gene_Bol029886	--	0	0.420784	0.371348	14.2958	20.1553	17.4936	59.8041	20.0604	38.1145	5.63557	up	1.60246	up	--	--
gene_Bol029894	gene_Bol029894	--	1.90088	2.94355	2.36791	16.5227	13.0132	19.1425	28.2058	27.409	38.7043	2.43165	up	1.43449	up	K09419|5.7e-195|bna:106402605|K09419 heat shock transcription factor, other eukaryote | (RefSeq) heat stress transcription factor A-4a	--
gene_Bol029920	gene_Bol029920	--	1.4634	1.27912	0.692698	31.6773	26.8657	16.1151	56.9954	41.7561	100.676	4.14404	up	1.9452	up	K07904|5.1e-106|bna:106372993|K07904 Ras-related protein Rab-11A | (RefSeq) ras-related protein RABA1e	Endocytosis (ko04144)
gene_Bol029960	gene_Bol029960	--	291.032	204.148	244.235	651.053	589.78	329.838	760.795	898.255	1182.49	0.798348	up	1.33171	up	K00831|7.7e-247|bna:106436619|K00831 phosphoserine aminotransferase [EC:2.6.1.52] | (RefSeq) phosphoserine aminotransferase 1, chloroplastic	Glycine, serine and threonine metabolism (ko00260);; Cysteine and methionine metabolism (ko00270);; Vitamin B6 metabolism (ko00750);; Carbon metabolism (ko01200);; Biosynthesis of amino acids (ko01230)
gene_Bol029970	gene_Bol029970	LOC106340460	0	0	0.201152	9.90166	13.1061	6.67255	42.4266	26.4265	42.9233	6.82687	up	2.36701	up	K22683|5.5e-308|bna:106434490|K22683 aspartyl protease family protein [EC:3.4.23.-] | (RefSeq) aspartic proteinase nepenthesin-2	--
gene_Bol030007	gene_Bol030007	--	1.62272	1.21397	1.88175	4.90944	3.79231	4.23978	7.34997	4.68731	7.97002	1.15152	up	1.09723	up	K14833|8.5e-15|csl:COCSUDRAFT_46926|K14833 nucleolar complex protein 2 | (RefSeq) hypothetical protein	--
gene_Bol030074	gene_Bol030074	LOC106341105	0	0	0	6.65052	4.16948	2.86801	10.5028	9.93459	4.59522	8.45935	up	1.21379	up	--	--
gene_Bol030088	gene_Bol030088	LOC106339807	11.9631	11.7663	13.5392	55.7039	47.334	35.8475	127.76	38.7744	422.778	1.598	up	2.73056	up	K01188|1.9e-261|bna:106392366|K01188 beta-glucosidase [EC:3.2.1.21] | (RefSeq) beta-glucosidase 27-like	Cyanoamino acid metabolism (ko00460);; Starch and sucrose metabolism (ko00500);; Phenylpropanoid biosynthesis (ko00940)
gene_Bol030125	gene_Bol030125	LOC106340706	0	0	0	9.32457	16.7139	3.74642	46.8867	11.3813	90.4443	9.65145	up	2.89226	up	--	--
gene_Bol030147	gene_Bol030147	LOC106394882	0.117756	0.407821	0	5.11702	3.69752	5.31864	12.0939	10.0471	5.14199	4.41599	up	1.29736	up	K07999|8.2e-95|gab:108459531|K07999 matrix metalloproteinase-20 (enamelysin) [EC:3.4.24.-] | (RefSeq) metalloendoproteinase 4-MMP-like	--
gene_Bol030160	gene_Bol030160	LOC106392107	1.8655	3.55016	3.28723	305.381	284.496	143.858	588.217	319.628	1063.63	6.09072	up	1.97295	up	K01051|1.7e-290|bna:106392107|K01051 pectinesterase [EC:3.1.1.11] | (RefSeq) probable pectinesterase/pectinesterase inhibitor 17	Pentose and glucuronate interconversions (ko00040)
gene_Bol030161	gene_Bol030161	LOC106391093	1.35012	2.11841	1.31296	258.57	264.347	115.696	547.913	241.978	972.732	6.76455	up	2.01714	up	K01051|7.1e-256|bna:106391093|K01051 pectinesterase [EC:3.1.1.11] | (RefSeq) probable pectinesterase/pectinesterase inhibitor 17	Pentose and glucuronate interconversions (ko00040)
gene_Bol030256	gene_Bol030256	--	6.64767	6.27508	6.30421	15.0777	15.7727	11.5672	21.7662	17.5713	19.3881	0.843789	up	0.893091	up	--	--
gene_Bol030336	gene_Bol030336	LOC106313352	48.3092	51.1701	54.5279	106.901	106.281	75.5621	115.209	108.525	159.792	0.609616	up	0.887401	up	K19995|4.8e-152|boe:106313352|K19995 secretory carrier-associated membrane protein | (RefSeq) secretory carrier-associated membrane protein 3-like	--
gene_Bol030349	gene_Bol030349	LOC106391178	2.68169	1.70725	1.18609	8.53691	14.0392	4.20334	13.1549	13.875	13.707	1.98729	up	1.02471	up	K08472|3.7e-233|bna:106391178|K08472 mlo protein | (RefSeq) MLO-like protein 6	--
gene_Bol030432	gene_Bol030432	LOC106316238	0	0.359431	0.130527	19.7789	20.4474	8.5828	33.0653	27.6819	27.4083	6.29666	up	1.26491	up	K13424|3.0e-22|lja:Lj0g3v0288169.1|K13424 WRKY transcription factor 33 | (RefSeq) Lj0g3v0288169.1; -	MAPK signaling pathway - plant (ko04016);; Plant-pathogen interaction (ko04626)
gene_Bol030518	gene_Bol030518	--	2.13492	1.90155	0.967855	4.5775	3.21261	2.99604	6.53395	3.26725	6.35723	0.811853	up	1.04878	up	K03364|5.6e-264|bna:106388566|K03364 cell division cycle 20-like protein 1, cofactor of APC complex | (RefSeq) protein FIZZY-RELATED 1-like	Ubiquitin mediated proteolysis (ko04120)
gene_Bol030562	gene_Bol030562	LOC106333761	0	0.099258	0	1.73874	4.30393	0.802354	3.76355	3.37649	9.1626	5.8009	up	1.78838	up	--	--
gene_Bol030586	gene_Bol030586	LOC106334967	0.22066	0.827749	1.00754	8.9576	5.63432	2.61936	18.7134	9.40081	20.0626	2.70645	up	1.96054	up	K12486|6.5e-193|bna:106409920|K12486 stromal membrane-associated protein | (RefSeq) probable ADP-ribosylation factor GTPase-activating protein AGD13 isoform X1	Endocytosis (ko04144)
gene_Bol030627	gene_Bol030627	--	0	0	0	16.7785	11.6649	15.6394	83.2963	26.3727	117.799	10.9744	up	2.90903	up	K24028|4.8e-28|cam:101505281|K24028 salicylic acid 3-hydroxylase [EC:1.14.11.-] | (RefSeq) flavonol synthase/flavanone 3-hydroxylase-like	--
gene_Bol030676	gene_Bol030676	--	9.37508	29.4122	14.2998	112.37	117.621	127.437	222.601	185.902	74.3086	2.44149	up	0.753918	up	K05391|1.2e-217|bna:106435604|K05391 cyclic nucleotide gated channel, plant | (RefSeq) probable cyclic nucleotide-gated ion channel 12	Plant-pathogen interaction (ko04626)
gene_Bol030790	gene_Bol030790	LOC106294814	68.8705	76.6483	99.6058	518.415	521.047	482.862	526.563	733.747	482.1	2.32994	up	0.589894	up	K00020|1.2e-54|qsu:111987869|K00020 3-hydroxyisobutyrate dehydrogenase [EC:1.1.1.31] | (RefSeq) uncharacterized protein LOC111987869	Valine, leucine and isoleucine degradation (ko00280)
gene_Bol030886	gene_Bol030886	LOC106429291	2.51004	1.63566	1.65603	47.3522	47.6172	27.9927	65.8046	62.8579	38.3264	4.08439	up	0.804212	up	K14379|2.6e-62|bna:106429291|K14379 tartrate-resistant acid phosphatase type 5 [EC:3.1.3.2] | (RefSeq) purple acid phosphatase 17-like	Riboflavin metabolism (ko00740)
gene_Bol030887	gene_Bol030887	--	1.62966	0.977989	1.05839	36.9169	42.4459	28.1956	44.5063	57.0104	27.3893	4.5508	up	0.614596	up	K14379|9.0e-65|bna:106429291|K14379 tartrate-resistant acid phosphatase type 5 [EC:3.1.3.2] | (RefSeq) purple acid phosphatase 17-like	Riboflavin metabolism (ko00740)
gene_Bol030925	gene_Bol030925	LOC106302405	0.472661	0.550647	0.18541	50.371	55.2677	47.1447	100.337	60.619	128.084	6.35572	up	1.41261	up	--	--
gene_Bol030989	gene_Bol030989	LOC106292702	5.77352	4.32093	5.27195	19.5086	21.3831	14.8326	84.6702	45.0514	367.314	1.56331	up	3.8102	up	K14963|1.6e-30|pvu:PHAVU_009G108900g|K14963 COMPASS component SWD3 | (RefSeq) hypothetical protein	--
gene_Bol030994	gene_Bol030994	LOC106315281	0.587198	0.905183	0.440043	5.7774	4.46799	3.37277	17.683	6.93531	17.5874	2.49969	up	2.11194	up	K00924|4.0e-238|lang:109349427|K00924 kinase [EC:2.7.1.-] | (RefSeq) CDPK-related protein kinase-like	--
gene_Bol031006	gene_Bol031006	LOC106293355	0.21347	0.17483	0	73.3656	62.3719	85.9015	118.666	170.361	114.044	8.76637	up	1.26561	up	K16292|6.0e-109|csl:COCSUDRAFT_21961|K16292 KDEL-tailed cysteine endopeptidase [EC:3.4.22.-] | (RefSeq) hypothetical protein	--
gene_Bol031021	gene_Bol031021	LOC106316700	1.4918	2.68561	3.98992	44.8834	44.4377	39.3395	59.7875	46.2218	41.8683	3.65559	up	0.60076	up	--	--
gene_Bol031066	gene_Bol031066	--	3.34084	5.84037	4.91956	29.1627	27.9306	20.5573	48.9935	42.8665	67.7453	2.1575	up	1.52185	up	K10614|7.5e-18|cvr:CHLNCDRAFT_57991|K10614 E3 ubiquitin-protein ligase HERC3 [EC:2.3.2.26] | (RefSeq) hypothetical protein	Ubiquitin mediated proteolysis (ko04120)
gene_Bol031098	gene_Bol031098	--	14.929	17.596	15.2816	50.0684	57.9394	36.3115	96.0341	60.9191	137.18	1.2996	up	1.53234	up	--	--
gene_Bol031109	gene_Bol031109	--	0	0	0	9.68079	4.27918	5.35981	10.5914	23.6902	24.6372	7.85765	up	2.0757	up	--	--
gene_Bol031153	gene_Bol031153	LOC106375488	4.58399	1.47552	2.43738	19.8198	19.793	13.3274	26.8361	17.3814	23.0663	2.34733	up	0.779146	up	--	--
gene_Bol031171	gene_Bol031171	LOC106428671	28.8651	35.5806	24.7874	73.1904	70.8032	70.4117	91.7756	90.1442	100.269	0.965929	up	0.840245	up	K02739|9.7e-155|bna:106428671|K02739 20S proteasome subunit beta 2 [EC:3.4.25.1] | (RefSeq) proteasome subunit beta type-7-A-like	Proteasome (ko03050)
gene_Bol031180	gene_Bol031180	LOC106382129	3.26403	3.43864	2.92467	9.99819	8.9265	9.76699	12.3771	9.86701	10.5679	1.27581	up	0.617927	up	--	--
gene_Bol031236	gene_Bol031236	LOC106417812	0.970627	0.799606	0.690432	33.1744	26.0061	15.0256	58.2514	67.74	106.75	4.57439	up	2.14863	up	--	--
gene_Bol031237	gene_Bol031237	LOC106416355	0.571924	0.610199	0.31321	3.53703	4.28008	3.84141	5.41778	5.56411	4.11429	2.55138	up	0.758151	up	--	--
gene_Bol031296	gene_Bol031296	LOC106307753	10.4188	12.1414	12.5115	33.6403	27.4997	20.9769	60.76	52.3982	73.0424	0.927024	up	1.64642	up	K13416|3.8e-61|dzi:111282013|K13416 brassinosteroid insensitive 1-associated receptor kinase 1 [EC:2.7.10.1 2.7.11.1] | (RefSeq) BRASSINOSTEROID INSENSITIVE 1-associated receptor kinase 1-like isoform X1	MAPK signaling pathway - plant (ko04016);; Plant hormone signal transduction (ko04075);; Plant-pathogen interaction (ko04626)
gene_Bol031297	gene_Bol031297	LOC106416157	6.59345	6.37821	6.16814	13.6928	11.5733	10.8339	16.7444	15.4008	24.4679	0.617764	up	1.13794	up	--	--
gene_Bol031300	gene_Bol031300	LOC106414081	0.893165	0.799905	0.240576	129.807	140.333	126.181	511.057	528.095	643.057	7.34812	up	2.54438	up	--	--
gene_Bol031338	gene_Bol031338	LOC106311094	0.468688	0.983992	1.3642	80.9518	18.4526	26.7627	245.846	140.301	360.646	5.11946	up	3.0933	up	K01728|1.3e-14|rcu:8277989|K01728 pectate lyase [EC:4.2.2.2] | (RefSeq) probable pectate lyase 16	Pentose and glucuronate interconversions (ko00040)
gene_Bol031340	gene_Bol031340	--	0.229876	0.269557	0.742884	122.542	35.1397	41.0105	300.059	200.674	415.537	6.88858	up	2.71516	up	K01728|1.1e-13|rcu:8277989|K01728 pectate lyase [EC:4.2.2.2] | (RefSeq) probable pectate lyase 16	Pentose and glucuronate interconversions (ko00040)
gene_Bol031354	gene_Bol031354	LOC106307926	2.02009	4.90802	13.1961	75.9854	56.2974	38.7589	140.521	68.9518	153.788	2.76016	up	1.57158	up	K22324|3.2e-182|brp:103843151|K22324 aliphatic glucosinolate S-oxygenase [EC:1.14.13.237] | (RefSeq) flavin-containing monooxygenase FMO GS-OX5	--
gene_Bol031410	gene_Bol031410	--	17.6682	18.6129	22.1319	46.0412	41.6213	45.4648	55.7086	42.6105	58.4304	0.883566	up	0.691747	up	K02737|4.6e-127|bna:106396989|K02737 20S proteasome subunit beta 5 [EC:3.4.25.1] | (RefSeq) proteasome subunit beta type-5-B	Proteasome (ko03050)
gene_Bol031413	gene_Bol031413	LOC106411941	2.52464	1.5804	2.7435	10.5645	12.8882	8.62793	26.9529	15.6409	20.5934	1.93187	up	1.39995	up	K20559|1.4e-191|crb:17884730|K20559 dihydrocamalexate/camalexin synthase [EC:1.14.19.52] | (RefSeq) bifunctional dihydrocamalexate synthase/camalexin synthase	MAPK signaling pathway - plant (ko04016)
gene_Bol031426	gene_Bol031426	--	15.3388	14.8775	10.3669	62.1647	55.6284	40.7623	100.457	77.6925	132.969	1.67621	up	1.45799	up	K01530|0.0e+00|boe:106312199|K01530 phospholipid-translocating ATPase [EC:7.6.2.1] | (RefSeq) putative phospholipid-transporting ATPase 11	--
gene_Bol031462	gene_Bol031462	LOC106312515	32.9011	34.1501	31.2884	64.7737	69.264	63.3566	83.3667	79.8047	91.8396	0.708109	up	0.815257	up	K06272|2.7e-50|vvi:100852545|K06272 integrin-linked kinase [EC:2.7.11.1] | (RefSeq) serine/threonine-protein kinase TNNI3K	--
gene_Bol031471	gene_Bol031471	--	7.84156	10.9772	7.48712	122.725	113.138	89.1552	247.199	202.017	274.665	3.32858	up	1.6129	up	K13681|0.0e+00|boe:106308291|K13681 xyloglucan fucosyltransferase [EC:2.4.1.-] | (RefSeq) fucosyltransferase 6-like	--
gene_Bol031496	gene_Bol031496	LOC106380925	11.5555	7.33517	7.97724	21.2952	21.0843	14.8913	29.0833	22.5615	23.0927	0.8038	up	0.797601	up	K00924|2.3e-78|ath:AT3G55450|K00924 kinase [EC:2.7.1.-] | (RefSeq) PBL1; PBS1-like 1	--
gene_Bol031503	gene_Bol031503	LOC106401884	12.3969	11.9023	11.4592	27.0226	26.1507	28.5578	44.0118	32.2217	34.021	0.894118	up	0.848073	up	K24083|9.6e-70|dzi:111284751|K24083 abhydrolase domain-containing protein 13 [EC:3.-.-.-] | (RefSeq) protein bem46-like isoform X1	--
gene_Bol031505	gene_Bol031505	LOC106402051	2.01966	0.888875	0.718021	7.34891	7.44322	4.08234	40.9573	5.33886	72.9769	2.09485	up	3.24564	up	K00430|1.6e-146|bna:106402051|K00430 peroxidase [EC:1.11.1.7] | (RefSeq) peroxidase 4-like	Phenylpropanoid biosynthesis (ko00940)
gene_Bol031508	gene_Bol031508	--	1.90878	1.73327	2.00915	27.4236	21.6593	12.3052	91.7191	47.7024	290.013	3.13494	up	3.42721	up	K14491|8.4e-09|cic:CICLE_v10007648mg|K14491 two-component response regulator ARR-B family | (RefSeq) hypothetical protein	Plant hormone signal transduction (ko04075)
gene_Bol031529	gene_Bol031529	LOC106308080	36.2301	64.3969	38.8749	356.126	384.63	287.475	534.387	558.899	554.018	2.58225	up	1.10988	up	--	--
gene_Bol031545	gene_Bol031545	LOC106307397	4.63639	6.07493	15.4856	276.119	251.968	132.701	826.351	653.595	2253.21	4.34021	up	3.07994	up	--	--
gene_Bol031546	gene_Bol031546	--	0.654705	0.737739	1.06229	9.02435	7.72892	6.96369	12.1098	9.79618	15.9845	2.95334	up	1.15787	up	--	--
gene_Bol031562	gene_Bol031562	LOC106310933	0	0	0	47.1271	47.6419	36.0369	46.283	58.9936	49.5971	11.6071	up	0.662586	up	K08234|1.3e-08|boe:106335227|K08234 glyoxylase I family protein | (RefSeq) uncharacterized protein LOC106335227 isoform X1	--
gene_Bol031563	gene_Bol031563	BNAC08G38910D	0	0.190009	0.401635	12.2144	16.1402	6.61501	37.7304	16.6928	83.9655	5.40198	up	2.55302	up	--	--
gene_Bol031569	gene_Bol031569	LOC106312109	32.3084	45.0819	56.5378	99.3786	89.616	65.6051	128.466	101.697	158.556	0.620519	up	1.08465	up	K01176|1.6e-65|sbi:8065370|K01176 alpha-amylase [EC:3.2.1.1] | (RefSeq) alpha-amylase isozyme 2A	Starch and sucrose metabolism (ko00500)
gene_Bol031976	gene_Bol031976	LOC106406831	11.2323	14.2204	13.7056	31.1109	32.0343	26.9141	45.3416	39.8229	49.7273	0.901304	up	1.03309	up	K23334|8.2e-271|bna:106406831|K23334 Ran-binding protein 9/10 | (RefSeq) ran-binding protein 10-like	--
gene_Bol031987	gene_Bol031987	LOC106418582	38.4102	41.132	42.1361	78.5241	75.5508	75.0075	128.806	99.5225	133.382	0.612226	up	1.11158	up	K17506|1.1e-133|bna:106418582|K17506 protein phosphatase 1L [EC:3.1.3.16] | (RefSeq) probable protein phosphatase 2C 10	--
gene_Bol032092	gene_Bol032092	LOC106313732	0.638347	0.975041	1.07312	114.746	113.542	70.0562	174.411	255.077	165.918	6.4812	up	1.3901	up	K14638|6.4e-204|vra:106756881|K14638 solute carrier family 15 (peptide/histidine transporter), member 3/4 | (RefSeq) protein NRT1/ PTR FAMILY 5.2-like	--
gene_Bol032114	gene_Bol032114	LOC106317132	0.424058	1.91983	0.580022	39.265	28.5095	19.3524	47.8853	48.9712	59.5876	4.54799	up	1.30236	up	K12835|2.5e-12|cmax:111493042|K12835 ATP-dependent RNA helicase DDX42 [EC:3.6.4.13] | (RefSeq) DEAD-box ATP-dependent RNA helicase 24 isoform X1	Spliceosome (ko03040)
gene_Bol032208	gene_Bol032208	LOC106318564	35.5544	33.7797	40.7454	91.3246	92.362	121.409	127.115	127.368	174.471	1.16612	up	0.968439	up	K15363|1.2e-60|bna:111210893|K15363 fanconi-associated nuclease 1 [EC:3.1.21.- 3.1.4.1] | (RefSeq) fanconi-associated nuclease 1 homolog	--
gene_Bol032253	gene_Bol032253	--	5.6045	5.20061	4.32841	18.6833	22.1804	17.6534	31.4913	21.2814	33.1093	1.65638	up	1.01312	up	K00924|9.0e-108|ath:AT3G55450|K00924 kinase [EC:2.7.1.-] | (RefSeq) PBL1; PBS1-like 1	--
gene_Bol032270	gene_Bol032270	--	3.05032	0.402079	2.08856	82.4362	102.995	82.6814	142.119	140.838	149.384	5.29365	up	1.12426	up	K00521|3.5e-35|cmos:111447866|K00521 ferric-chelate reductase [EC:1.16.1.7] | (RefSeq) ferric reduction oxidase 7, chloroplastic-like	--
gene_Bol032271	gene_Bol032271	--	1.21682	1.43743	2.09599	81.1396	100.01	87.1062	122.531	109.258	124.067	5.47656	up	0.844081	up	--	--
gene_Bol032293	gene_Bol032293	--	29.3529	36.6511	71.3669	102.506	99.9518	96.6446	210.659	232.046	228.614	0.807516	up	1.60122	up	K14207|4.0e-155|boe:106312890|K14207 solute carrier family 38 (sodium-coupled neutral amino acid transporter), member 2 | (RefSeq) probable sodium-coupled neutral amino acid transporter 6	--
gene_Bol032317	gene_Bol032317	LOC106428093	6.46605	8.4962	7.63226	14.5264	21.1298	14.5187	31.39	18.8106	47.4355	0.843199	up	1.4722	up	K17361|4.5e-64|bna:106428093|K17361 acyl-coenzyme A thioesterase 9 [EC:3.1.2.-] | (RefSeq) acyl-coenzyme A thioesterase 9, mitochondrial	--
gene_Bol032318	gene_Bol032318	--	5.66932	8.55098	7.65251	17.5509	20.1478	16.137	33.5765	18.7013	46.4243	0.99739	up	1.38375	up	K17361|6.4e-149|bna:106428093|K17361 acyl-coenzyme A thioesterase 9 [EC:3.1.2.-] | (RefSeq) acyl-coenzyme A thioesterase 9, mitochondrial	--
gene_Bol032322	gene_Bol032322	LOC106316577	0.487595	0.049384	0.107384	157.791	165.341	55.243	881.913	275.668	663.744	8.87559	up	2.71186	up	K22683|6.3e-17|mdm:103430646|K22683 aspartyl protease family protein [EC:3.4.23.-] | (RefSeq) protein ASPARTIC PROTEASE IN GUARD CELL 1	--
gene_Bol032376	gene_Bol032376	LOC111211533	11.3837	7.64271	12.9004	46.1888	39.9728	39.2339	67.3385	55.1922	37.1332	1.67292	up	0.719169	up	K14491|2.2e-09|mdm:103403691|K14491 two-component response regulator ARR-B family | (RefSeq) two-component response regulator ARR1-like isoform X1	Plant hormone signal transduction (ko04075)
gene_Bol032388	gene_Bol032388	LOC106317909	20.6639	17.2972	23.793	83.7454	74.9041	90.631	130.334	126.077	117.36	1.70951	up	1.00585	up	K14724|9.0e-221|ghi:107926372|K14724 solute carrier family 9 (sodium/hydrogen exchanger), member 8 | (RefSeq) sodium/hydrogen exchanger 2-like	--
gene_Bol032404	gene_Bol032404	LOC106436601	3.56581	2.82886	5.12093	65.433	71.4977	66.0021	72.759	128.522	58.1124	3.83496	up	0.715175	up	K10664|5.9e-181|bna:106436601|K10664 E3 ubiquitin-protein ligase ATL6/9/15/31/42/55 [EC:2.3.2.27] | (RefSeq) LOW QUALITY PROTEIN: E3 ubiquitin-protein ligase ATL31	--
gene_Bol032438	gene_Bol032438	LOC106313932	6.52951	7.43966	5.98322	22.1916	16.9437	24.6975	59.8303	24.1997	38.2772	1.3733	up	1.36309	up	--	--
gene_Bol032536	gene_Bol032536	--	6.79527	6.87426	3.70806	15.3993	17.0395	21.9658	29.1705	24.9854	21.6629	1.351	up	0.881115	up	K06694|2.1e-55|bna:106437940|K06694 26S proteasome non-ATPase regulatory subunit 10 | (RefSeq) 26S proteasome non-ATPase regulatory subunit 10	--
gene_Bol032545	gene_Bol032545	LOC106313849	11.4069	12.3574	5.21421	32.8125	32.6741	32.5383	44.7447	46.9517	54.2325	1.4684	up	1.02684	up	--	--
gene_Bol032662	gene_Bol032662	--	7.20742	6.24338	4.17042	20.5716	18.4531	18.394	25.637	21.7215	19.2175	1.41306	up	0.617973	up	--	--
gene_Bol032739	gene_Bol032739	--	0.938844	1.66675	1.96542	9.49649	7.92013	4.25627	13.2889	8.13693	26.9721	1.93348	up	1.71568	up	--	--
gene_Bol032755	gene_Bol032755	--	11.7771	17.8233	29.3402	226.129	197.562	211.876	400.052	242.051	253.195	3.11378	up	0.897177	up	--	--
gene_Bol032762	gene_Bol032762	LOC106328473	2.11519	2.53907	1.70483	5.7385	6.38467	5.75684	6.89302	7.36102	6.8141	1.18445	up	0.655309	up	K20043|2.7e-54|mtr:MTR_3g086670|K20043 clathrin coat assembly protein AP180 | (RefSeq) clathrin assembly protein	--
gene_Bol032767	gene_Bol032767	LOC106330945	10.5536	2.40795	4.8284	92.6287	112.273	54.8048	247.799	121.103	356.452	3.59698	up	1.99969	up	K11812|3.7e-304|boe:106330945|K11812 tryptophan N-monooxygenase [EC:1.14.14.156] | (RefSeq) cytochrome P450 79B1-like	Tryptophan metabolism (ko00380);; Glucosinolate biosynthesis (ko00966);; 2-Oxocarboxylic acid metabolism (ko01210)
gene_Bol032816	gene_Bol032816	LOC111208799	11.8141	4.81607	9.91222	38.1752	27.5046	17.8642	19.3319	49.2629	96.6262	1.36161	up	1.55609	up	K19968|3.7e-148|bna:106440545|K19968 (E)-beta-ocimene synthase [EC:4.2.3.106] | (RefSeq) tricyclene synthase, chloroplastic-like isoform X1	--
gene_Bol032835	gene_Bol032835	LOC111208826	16.5983	17.6154	15.0693	77.2581	68.8998	52.6697	74.7865	80.4183	87.6761	1.7159	up	0.734457	up	K10848|5.1e-105|cic:CICLE_v10024418mg|K10848 DNA excision repair protein ERCC-4 [EC:3.1.-.-] | (RefSeq) hypothetical protein	Nucleotide excision repair (ko03420)
gene_Bol032880	gene_Bol032880	LOC106385511	0.959558	0.476707	0.772226	5.43443	5.09249	5.27741	7.95464	6.74502	5.63795	2.53901	up	0.758245	up	--	--
gene_Bol032916	gene_Bol032916	LOC106328533	10.0912	8.07844	6.03302	18.2757	19.144	17.1609	31.1941	22.8568	23.5427	0.882164	up	0.917481	up	K13448|1.1e-127|bna:106401909|K13448 calcium-binding protein CML | (RefSeq) probable calcium-binding protein CML48	Plant-pathogen interaction (ko04626)
gene_Bol032919	gene_Bol032919	LOC106329261	55.512	32.7392	37.4839	96.2062	73.5663	69.5243	165.246	114.979	181.529	0.638061	up	1.41634	up	K02639|1.2e-82|bna:106397431|K02639 ferredoxin | (RefSeq) ferredoxin, root R-B1	Photosynthesis (ko00195)
gene_Bol032956	gene_Bol032956	LOC106299111	27.2866	12.3404	11.4673	79.2133	86.2258	66.4002	88.9737	98.934	106.809	1.90369	up	0.791187	up	K00799|1.0e-128|boe:106299111|K00799 glutathione S-transferase [EC:2.5.1.18] | (RefSeq) glutathione S-transferase U12-like	Glutathione metabolism (ko00480)
gene_Bol032957	gene_Bol032957	LOC106298502	81.9208	80.4773	109.994	318.396	317.928	257.823	460.965	312.617	332.769	1.4132	up	0.717948	up	K00799|1.2e-138|boe:106298502|K00799 glutathione S-transferase [EC:2.5.1.18] | (RefSeq) glutathione S-transferase U12	Glutathione metabolism (ko00480)
gene_Bol033021	gene_Bol033021	BNAC06G43660D	1.98358	1.73358	2.22775	6.90677	5.26924	4.67861	6.83755	8.16274	9.1501	1.19924	up	0.975606	up	K20892|0.0e+00|bna:106405625|K20892 beta-arabinofuranosyltransferase [EC:2.4.2.-] | (RefSeq) BNAC06G43660D; beta-arabinofuranosyltransferase RAY1 isoform X1	--
gene_Bol033080	gene_Bol033080	LOC106325333	0	0	0	4.41034	3.52674	2.26124	30.1813	9.90223	95.9311	9.56007	up	4.37141	up	K20770|5.8e-116|gra:105789196|K20770 (+)-delta-cadinene 8-hydroxylase [EC:1.14.-.-] | (RefSeq) flavonoid 3'-monooxygenase-like	--
gene_Bol033109	gene_Bol033109	--	74.9781	70.6658	52.8842	251.68	225.315	211.563	815.787	515.788	754.993	1.50046	up	2.04848	up	--	--
gene_Bol033133	gene_Bol033133	LOC106327220	22.8863	23.8632	24.6466	106.473	106.617	134.03	130.51	137.25	180.163	1.97772	up	0.841432	up	K14207|1.3e-252|bna:106401826|K14207 solute carrier family 38 (sodium-coupled neutral amino acid transporter), member 2 | (RefSeq) amino acid transporter AVT6A-like	--
gene_Bol033263	gene_Bol033263	LOC106339808	6.19079	7.36809	8.47543	16.9981	16.7735	19.7078	21.0818	18.3905	28.5834	0.971148	up	0.828819	up	K14016|4.7e-174|bna:106391406|K14016 ubiquitin fusion degradation protein 1 | (RefSeq) ubiquitin fusion degradation protein 1 homolog	Protein processing in endoplasmic reticulum (ko04141)
gene_Bol033287	gene_Bol033287	LOC106337211	3.83837	2.15489	2.27972	5.44471	5.78204	4.85924	6.02891	7.07542	7.17403	0.666941	up	0.769618	up	K14689|6.3e-197|boe:106337211|K14689 solute carrier family 30 (zinc transporter), member 2 | (RefSeq) metal tolerance protein B	--
gene_Bol033337	gene_Bol033337	--	0.134533	0.44087	0	8.36331	4.08528	4.93862	35.221	22.4601	38.1289	4.56057	up	2.93376	up	K15078|9.4e-44|bna:106348406|K15078 structure-specific endonuclease subunit SLX1 [EC:3.6.1.-] | (RefSeq) uncharacterized protein LOC106348406	--
gene_Bol033394	gene_Bol033394	--	0.146152	0.52754	0.301598	11.4369	7.91033	7.99205	11.1389	10.944	13.1968	4.42377	up	0.822518	up	--	--
gene_Bol033477	gene_Bol033477	LOC106312180	415.336	212.799	215.468	1465.26	1457.01	804.765	1569.11	1268.01	2654.69	1.86592	up	1.07426	up	K11818|2.5e-286|boe:106312180|K11818 aromatic aldoxime N-monooxygenase [EC:1.14.14.45] | (RefSeq) cytochrome P450 83B1	Tryptophan metabolism (ko00380);; Glucosinolate biosynthesis (ko00966);; 2-Oxocarboxylic acid metabolism (ko01210)
gene_Bol033584	gene_Bol033584	--	3.96461	4.37118	3.11184	107.876	125.04	126.012	266.554	226.717	195.907	4.67016	up	1.34203	up	K18592|5.9e-303|bna:106366438|K18592 gamma-glutamyltranspeptidase / glutathione hydrolase / leukotriene-C4 hydrolase [EC:2.3.2.2 3.4.19.13 3.4.19.14] | (RefSeq) gamma-glutamyltranspeptidase 3-like	Taurine and hypotaurine metabolism (ko00430);; Cyanoamino acid metabolism (ko00460);; Glutathione metabolism (ko00480);; Arachidonic acid metabolism (ko00590)
gene_Bol033661	gene_Bol033661	LOC106304921	0.056888	0.353632	0.697433	13.1426	6.02939	6.61961	68.9966	36.1382	198.167	4.14302	up	4.17079	up	K17500|9.0e-55|nta:107765414|K17500 integrin-linked kinase-associated serine/threonine phosphatase 2C [EC:3.1.3.16] | (RefSeq) WAT1-related protein At3g18200-like	--
gene_Bol033669	gene_Bol033669	LOC106410489	7.85701	14.4921	18.5757	58.7793	52.6987	48.0288	71.0197	75.5203	88.2706	1.64942	up	1.01372	up	K18798|5.3e-284|boe:106305831|K18798 peroxisome-assembly ATPase [EC:3.6.4.7] | (RefSeq) lactation elevated protein 1 isoform X1	--
gene_Bol033673	gene_Bol033673	LOC106408942	5.83987	5.0511	5.12162	23.4998	23.9413	18.6689	31.7089	29.1654	27.2301	1.75008	up	0.828314	up	K05391|0.0e+00|bna:106408942|K05391 cyclic nucleotide gated channel, plant | (RefSeq) putative cyclic nucleotide-gated ion channel 9 isoform X2	Plant-pathogen interaction (ko04626)
gene_Bol033689	gene_Bol033689	--	2.75924	2.6105	3.19443	15.626	14.7028	14.7426	24.0628	21.6157	26.8649	2.09457	up	1.13976	up	K08330|0.0e+00|bna:106410705|K08330 autophagy-related protein 11 | (RefSeq) autophagy-related protein 11-like	Autophagy - other (ko04136)
gene_Bol033727	gene_Bol033727	LOC106306501	3.30315	3.36226	2.90027	13.0777	14.1766	10.3781	23.5897	23.1562	20.3448	1.67612	up	1.24249	up	K19041|3.8e-21|aip:107622572|K19041 E3 ubiquitin-protein ligase RNF38/44 [EC:2.3.2.27] | (RefSeq) E3 ubiquitin-protein ligase MBR2 isoform X1	--
gene_Bol033763	gene_Bol033763	LOC106301996	2.33513	1.37875	1.65243	10.0461	10.0502	10.8886	25.9547	23.0334	32.6467	2.23366	up	1.86809	up	K09527|5.2e-06|pvu:PHAVU_002G034200g|K09527 DnaJ homolog subfamily C member 7 | (RefSeq) hypothetical protein	--
gene_Bol033791	gene_Bol033791	BNAC07G44010D	1.46765	1.4525	2.30425	5.69311	6.18347	3.40461	8.5663	10.3062	12.5176	1.24775	up	1.50142	up	--	--
gene_Bol033793	gene_Bol033793	LOC106409051	0.510582	0	0	36.361	17.9732	11.0518	290.742	83.8115	744.824	6.67906	up	4.71736	up	K14497|3.9e-25|nnu:104601109|K14497 protein phosphatase 2C [EC:3.1.3.16] | (RefSeq) protein phosphatase 2C 37-like	MAPK signaling pathway - plant (ko04016);; Plant hormone signal transduction (ko04075)
gene_Bol033799	gene_Bol033799	LOC106302104	27.223	18.4518	24.3279	66.4471	61.5602	73.9194	116.496	179.299	121.973	1.22999	up	1.45529	up	K13396|1.4e-84|psom:113295244|K13396 (S)-tetrahydroprotoberberine N-methyltransferase [EC:2.1.1.122] | (RefSeq) (S)-tetrahydroprotoberberine N-methyltransferase	Isoquinoline alkaloid biosynthesis (ko00950)
gene_Bol033820	gene_Bol033820	LOC106303760	9.64626	11.7204	18.8816	25.9763	26.9182	25.6223	41.9845	28.9847	30.8433	0.6539	up	0.78656	up	K10664|6.0e-36|vvi:100854068|K10664 E3 ubiquitin-protein ligase ATL6/9/15/31/42/55 [EC:2.3.2.27] | (RefSeq) RING-H2 finger protein ATL54	--
gene_Bol033864	gene_Bol033864	LOC106306226	119.555	145.761	138.967	484.94	475.951	420.816	627.635	504.726	579.35	1.47231	up	0.74285	up	--	--
gene_Bol034214	gene_Bol034214	LOC106332849	3.52617	10.674	5.75248	89.7768	66.1479	61.4295	182.796	151.564	208.592	3.12548	up	1.78319	up	K12835|1.0e-25|cmax:111493042|K12835 ATP-dependent RNA helicase DDX42 [EC:3.6.4.13] | (RefSeq) DEAD-box ATP-dependent RNA helicase 24 isoform X1	Spliceosome (ko03040)
gene_Bol034223	gene_Bol034223	--	85.7276	44.2503	59.6816	174.235	137.015	101.4	359.937	238.291	616.093	0.834317	up	2.08943	up	K00521|1.9e-32|cmos:111447866|K00521 ferric-chelate reductase [EC:1.16.1.7] | (RefSeq) ferric reduction oxidase 7, chloroplastic-like	--
gene_Bol034254	gene_Bol034254	LOC111204284	5.13967	5.36016	6.25414	57.4428	49.7719	46.8568	101.457	81.9162	107.58	2.89755	up	1.37066	up	K03255|2.4e-54|smo:SELMODRAFT_442478|K03255 protein TIF31 | (RefSeq) hypothetical protein	--
gene_Bol034302	gene_Bol034302	LOC106334071	0	0	0.061283	12.7946	11.545	3.18706	39.4574	5.79407	23.4218	8.17419	up	1.75036	up	--	--
gene_Bol034350	gene_Bol034350	LOC106334283	0.20409	0.372012	0	8.48256	10.3205	12.8922	16.3972	19.2738	9.09343	5.37174	up	0.851092	up	--	--
gene_Bol034386	gene_Bol034386	LOC106333360	0.040533	0.224352	0	3.41268	2.08148	1.87495	5.56171	6.56024	10.3811	4.31195	up	2.11221	up	K09775|1.8e-11|dzi:111283728|K09775 uncharacterized protein | (RefSeq) uncharacterized protein LOC111283728 isoform X1	--
gene_Bol034485	gene_Bol034485	--	6.39503	10.1323	7.20581	15.9249	17.683	13.1188	22.8561	18.3924	17.6019	0.678311	up	0.739542	up	K12580|0.0e+00|boe:106335602|K12580 CCR4-NOT transcription complex subunit 3 | (RefSeq) general negative regulator of transcription subunit 3-like isoform X1	RNA degradation (ko03018)
gene_Bol034487	gene_Bol034487	LOC106331929	0.265586	0.278509	0.248627	5.13703	2.81905	2.90556	14.696	7.10226	31.3306	3.33892	up	2.86031	up	K00521|3.2e-06|cmos:111447866|K00521 ferric-chelate reductase [EC:1.16.1.7] | (RefSeq) ferric reduction oxidase 7, chloroplastic-like	--
gene_Bol034529	gene_Bol034529	LOC106386787	1.24619	0.820764	1.17382	14.4992	12.1518	14.5929	20.1643	14.6655	15.4976	3.36173	up	0.704908	up	K04371|0.0e+00|bna:106386787|K04371 mitogen-activated protein kinase 1/3 [EC:2.7.11.24] | (RefSeq) mitogen-activated protein kinase 16-like	--
gene_Bol034603	gene_Bol034603	LOC106333797	0.335173	0.259404	0.456523	3.99731	5.67515	1.85737	9.82402	2.51963	12.6527	3.14804	up	1.6366	up	K13428|6.5e-145|boe:106333797|K13428 LRR receptor-like serine/threonine-protein kinase EFR [EC:2.7.11.1] | (RefSeq) LOW QUALITY PROTEIN: LRR receptor-like serine/threonine-protein kinase EFR	Plant-pathogen interaction (ko04626)
gene_Bol034636	gene_Bol034636	BNACNNG61640D	14.6779	14.8729	12.5951	36.5342	34.46	24.4103	60.7015	49.7951	24.5319	0.885658	up	0.836614	up	K08900|4.7e-14|jcu:105628818|K08900 mitochondrial chaperone BCS1 | (RefSeq) AAA-ATPase At3g50940	--
gene_Bol034760	gene_Bol034760	--	4.72021	6.20744	24.6186	108.594	97.189	70.2702	415.762	165.522	1394.01	2.63235	up	3.47765	up	K13051|2.9e-182|bna:106376850|K13051 L-asparaginase / beta-aspartyl-peptidase [EC:3.5.1.1 3.4.19.5] | (RefSeq) probable isoaspartyl peptidase/L-asparaginase 2	Alanine, aspartate and glutamate metabolism (ko00250);; Cyanoamino acid metabolism (ko00460)
gene_Bol034849	gene_Bol034849	--	0.461658	0.713043	0.15957	10.365	6.75384	5.64692	17.4625	26.2777	65.6312	3.7036	up	2.84214	up	K13459|3.3e-29|dzi:111275814|K13459 disease resistance protein RPS2 | (RefSeq) probable disease resistance protein At1g61300	Plant-pathogen interaction (ko04626)
gene_Bol034850	gene_Bol034850	LOC106381282	27.6867	33.1	29.7176	67.7426	71.4026	57.655	124.233	114.397	245.853	0.821751	up	1.83005	up	K03787|2.2e-169|bna:106381282|K03787 5'-nucleotidase [EC:3.1.3.5] | (RefSeq) uncharacterized protein LOC106381282	Purine metabolism (ko00230);; Pyrimidine metabolism (ko00240);; Nicotinate and nicotinamide metabolism (ko00760)
gene_Bol034886	gene_Bol034886	LOC106402654	0.664977	0.576259	0.469828	6.97552	7.09319	4.83674	10.9299	7.28438	9.17721	3.16557	up	0.964024	up	K13415|6.7e-74|var:108331590|K13415 protein brassinosteroid insensitive 1 [EC:2.7.10.1 2.7.11.1] | (RefSeq) systemin receptor SR160	Plant hormone signal transduction (ko04075)
gene_Bol035023	gene_Bol035023	LOC106381154	21.0108	23.5268	23.3705	93.5549	82.2722	92.622	154.605	137.073	110.091	1.67982	up	0.978369	up	K15014|1.6e-236|bna:106381154|K15014 solute carrier family 29 (equilibrative nucleoside transporter), member 1/2/3 | (RefSeq) equilibrative nucleotide transporter 1-like	--
gene_Bol035118	gene_Bol035118	LOC106336441	0.697599	0.764712	1.01658	6.46847	9.93486	4.31411	10.9793	11.029	14.1937	2.76152	up	1.25917	up	K06636|1.9e-14|ppp:112291699|K06636 structural maintenance of chromosome 1 | (RefSeq) structural maintenance of chromosomes protein 2-2-like	--
gene_Bol035127	gene_Bol035127	LOC106332932	4.85605	5.02055	6.67285	35.5248	34.7362	20.6115	130.242	89.0541	175.964	2.1534	up	2.61397	up	--	--
gene_Bol035134	gene_Bol035134	--	0	0.288438	0.259386	6.82298	10.1946	3.97499	30.7174	12.296	91.4212	4.56304	up	3.28659	up	--	--
gene_Bol035139	gene_Bol035139	LOC106328093	33.7697	34.8712	32.124	68.8526	64.0001	68.847	116.357	123.35	126.459	0.701471	up	1.29912	up	K03061|2.3e-142|bna:106377314|K03061 26S proteasome regulatory subunit T1 | (RefSeq) 26S proteasome regulatory subunit 7 homolog A	Proteasome (ko03050)
gene_Bol035140	gene_Bol035140	LOC106377308	46.3061	19.9246	21.3115	60.8891	118.657	52.455	94.5144	97.2968	243.818	1.13801	up	1.45936	up	K13430|2.2e-62|aof:109837340|K13430 serine/threonine-protein kinase PBS1 [EC:2.7.11.1] | (RefSeq) serine/threonine-protein kinase PBS1-like	Plant-pathogen interaction (ko04626)
gene_Bol035145	gene_Bol035145	LOC106332633	3.87176	1.05547	8.59922	319.788	158.49	143.235	2496.16	1093.45	1727.75	5.20107	up	3.52842	up	K10691|2.2e-40|ats:109762802|K10691 E3 ubiquitin-protein ligase UBR4 [EC:2.3.2.27] | (RefSeq) LOC109762802; auxin transport protein BIG	--
gene_Bol035146	gene_Bol035146	LOC106333016	2.06063	3.87966	8.96878	29.9317	26.6787	31.8549	139.881	35.4352	73.0437	2.24185	up	1.90147	up	K00679|5.4e-36|cic:CICLE_v10027727mg|K00679 phospholipid:diacylglycerol acyltransferase [EC:2.3.1.158] | (RefSeq) hypothetical protein	Glycerolipid metabolism (ko00561)
gene_Bol035174	gene_Bol035174	LOC106335618	19.007	20.1666	16.7742	39.7223	40.4543	46.8822	56.4881	53.9279	40.3607	0.884279	up	0.63898	up	K01950|0.0e+00|boe:106335618|K01950 NAD+ synthase (glutamine-hydrolysing) [EC:6.3.5.1] | (RefSeq) glutamine-dependent NAD(+) synthetase	Nicotinate and nicotinamide metabolism (ko00760)
gene_Bol035258	gene_Bol035258	--	0.30194	1.0193	0	2.84597	3.38768	1.27379	23.5996	8.49054	36.6555	2.18499	up	3.72432	up	K20718|1.3e-39|sot:102603167|K20718 LRR receptor-like serine/threonine-protein kinase ERECTA [EC:2.7.11.1] | (RefSeq) LRR receptor-like serine/threonine-protein kinase ERL1	MAPK signaling pathway - plant (ko04016)
gene_Bol035498	gene_Bol035498	LOC106332572	0	0.388211	0.315673	32.8497	31.0442	22.1838	39.025	65.1299	53.3809	6.54484	up	1.30262	up	K00521|3.5e-34|cmos:111447866|K00521 ferric-chelate reductase [EC:1.16.1.7] | (RefSeq) ferric reduction oxidase 7, chloroplastic-like	--
gene_Bol035526	gene_Bol035526	--	0.624419	0.20316	0.828837	3.19635	4.04135	1.73636	14.8975	1.46483	17.7875	2.12904	up	2.4548	up	--	--
gene_Bol035555	gene_Bol035555	LOC106389162	18.9608	19.6067	25.0166	38.7212	41.0508	41.2606	47.983	47.1808	47.4469	0.624914	up	0.666556	up	K00627|7.8e-289|bna:106389162|K00627 pyruvate dehydrogenase E2 component (dihydrolipoamide acetyltransferase) [EC:2.3.1.12] | (RefSeq) dihydrolipoyllysine-residue acetyltransferase component 2 of pyruvate dehydrogenase complex, mitochondrial-like isoform X4	Glycolysis / Gluconeogenesis (ko00010);; Citrate cycle (TCA cycle) (ko00020);; Pyruvate metabolism (ko00620);; Carbon metabolism (ko01200)
gene_Bol035656	gene_Bol035656	LOC106335505	7.03188	7.44239	7.20941	18.0473	17.7001	15.6519	21.766	21.5472	24.2403	0.947385	up	0.838846	up	K11293|0.0e+00|boe:106335505|K11293 protein HIRA/HIR1 | (RefSeq) protein HIRA isoform X1	--
gene_Bol035991	gene_Bol035991	LOC111202841	2.00052	2.57794	4.42919	9.60352	7.67969	5.4165	8.35247	11.9327	12.871	1.02241	up	1.00755	up	--	--
gene_Bol036051	gene_Bol036051	LOC106327565	14.4538	18.9087	33.8158	79.9911	92.8219	49.6267	142.484	102.521	143.964	1.4201	up	1.2544	up	K13035|1.4e-206|boe:106327565|K13035 beta-cyano-L-alanine hydratase/nitrilase [EC:3.5.5.4 4.2.1.65] | (RefSeq) bifunctional nitrilase/nitrile hydratase NIT4	Cyanoamino acid metabolism (ko00460)
gene_Bol036132	gene_Bol036132	LOC106326993	4.44494	4.36452	3.39756	15.1578	15.6534	14.3598	24.7419	19.7362	27.7236	1.59215	up	1.1368	up	--	--
gene_Bol036235	gene_Bol036235	AT5G23540	49.6531	41.313	50.4378	107.709	104.79	108.158	123.453	112.782	169.462	0.882501	up	0.820613	up	K03030|2.9e-171|ath:AT5G23540|K03030 26S proteasome regulatory subunit N11 | (RefSeq) Mov34/MPN/PAD-1 family protein	Proteasome (ko03050)
gene_Bol036272	gene_Bol036272	--	9.36389	16.831	20.2929	93.1605	139.444	63.1088	169.405	149.959	262.742	2.36712	up	1.46903	up	K11406|0.0e+00|boe:106301381|K11406 histone deacetylase 4/5 [EC:3.5.1.98] | (RefSeq) histone deacetylase 5-like	--
gene_Bol036484	gene_Bol036484	LOC106342054	38.6961	38.898	37.2449	74.8582	84.745	75.7017	108.117	92.743	106.571	0.737844	up	0.822792	up	K02736|1.2e-140|bna:111205232|K02736 20S proteasome subunit beta 7 [EC:3.4.25.1] | (RefSeq) proteasome subunit beta type-4-like	Proteasome (ko03050)
gene_Bol036513	gene_Bol036513	LOC106301408	37.8846	38.1026	52.0735	127.17	123.834	103.186	304.941	190.897	331.096	1.16521	up	1.69371	up	--	--
gene_Bol036516	gene_Bol036516	--	10.4847	14.5074	7.36799	23.188	22.4165	17.5148	27.4879	24.8885	22.0345	0.668955	up	0.642897	up	--	--
gene_Bol036555	gene_Bol036555	LOC106295180	6.05282	3.90839	5.94573	18.6941	17.2377	18.4003	44.3174	26.1784	32.6287	1.47141	up	1.34642	up	--	--
gene_Bol036583	gene_Bol036583	BNAC01G28490D	1.18232	1.48581	0.823785	5.30596	4.47522	3.37207	8.71106	7.14107	5.25489	1.60789	up	1.05794	up	--	--
gene_Bol036586	gene_Bol036586	--	7.10489	9.16171	7.07774	17.9657	18.7453	14.2981	28.2881	22.9918	47.8326	0.83088	up	1.47403	up	K16055|0.0e+00|bna:106377222|K16055 trehalose 6-phosphate synthase/phosphatase [EC:2.4.1.15 3.1.3.12] | (RefSeq) probable alpha,alpha-trehalose-phosphate synthase [UDP-forming] 10	Starch and sucrose metabolism (ko00500)
gene_Bol036634	gene_Bol036634	--	9.0726	12.4277	7.14486	21.687	17.9885	19.7937	38.1979	33.4491	56.0172	0.751721	up	1.59487	up	--	--
gene_Bol036736	gene_Bol036736	--	23.177	17.8623	28.2318	52.7833	52.7823	41.392	54.4179	73.6088	65.3892	0.786465	up	0.826022	up	--	--
gene_Bol036737	gene_Bol036737	LOC106350461	28.2423	22.3552	32.248	62.3422	68.5415	52.2884	82.3306	86.6917	81.8502	0.847442	up	0.877199	up	--	--
gene_Bol036768	gene_Bol036768	LOC106295890	13.6333	24.3302	47.6017	376.467	476.95	326.115	487.393	642.527	1329.5	3.46964	up	1.60606	up	K00826|8.3e-260|boe:106295890|K00826 branched-chain amino acid aminotransferase [EC:2.6.1.42] | (RefSeq) branched-chain-amino-acid aminotransferase 2, chloroplastic-like isoform X1	Cysteine and methionine metabolism (ko00270);; Valine, leucine and isoleucine degradation (ko00280);; Valine, leucine and isoleucine biosynthesis (ko00290);; Pantothenate and CoA biosynthesis (ko00770);; Glucosinolate biosynthesis (ko00966);; 2-Oxocarboxylic acid metabolism (ko01210);; Biosynthesis of amino acids (ko01230)
gene_Bol036807	gene_Bol036807	--	12.5499	11.2664	10.003	21.3804	21.2579	19.6263	26.6103	24.34	22.3478	0.586576	up	0.648367	up	K08596|0.0e+00|bna:106401278|K08596 sentrin-specific protease 7 [EC:3.4.22.68] | (RefSeq) probable ubiquitin-like-specific protease 2B isoform X1	--
gene_Bol036903	gene_Bol036903	--	0.92119	0.22067	1.06093	13.1776	11.2545	4.36479	21.2693	19.8996	10.8996	3.39224	up	1.20165	up	K17506|1.8e-28|vcn:VOLCADRAFT_63584|K17506 protein phosphatase 1L [EC:3.1.3.16] | (RefSeq) hypothetical protein	--
gene_Bol036980	gene_Bol036980	LOC106405866	8.40691	8.1933	6.22071	21.0312	20.1603	16.9137	24.6475	23.2355	24.3864	1.05526	up	0.746836	up	K16226|7.5e-96|bna:106437687|K16226 disease resistance protein RPS4 | (RefSeq) disease resistance protein RPS4-like	Plant-pathogen interaction (ko04626)
gene_Bol036994	gene_Bol036994	LOC106329081	0.842087	0.481779	0.495179	2.6437	1.80335	1.46257	10.9622	2.2276	2.14404	1.39297	up	1.68985	up	--	--
gene_Bol037024	gene_Bol037024	--	81.1672	112.99	205.236	378.385	411.906	381.257	507.494	474.025	501.329	1.2381	up	0.773004	up	K07513|8.2e-255|bna:106388024|K07513 acetyl-CoA acyltransferase 1 [EC:2.3.1.16] | (RefSeq) 3-ketoacyl-CoA thiolase 2, peroxisomal	Fatty acid degradation (ko00071);; Valine, leucine and isoleucine degradation (ko00280);; alpha-Linolenic acid metabolism (ko00592);; Biosynthesis of unsaturated fatty acids (ko01040);; Fatty acid metabolism (ko01212);; Peroxisome (ko04146)
gene_Bol037055	gene_Bol037055	--	0.285321	0.585015	0.81315	4.70403	5.65024	5.88961	6.30142	7.71312	4.98493	2.9466	up	0.612038	up	K11517|3.7e-129|bna:106407442|K11517 (S)-2-hydroxy-acid oxidase [EC:1.1.3.15] | (RefSeq) peroxisomal (S)-2-hydroxy-acid oxidase GLO5-like	Glyoxylate and dicarboxylate metabolism (ko00630);; Carbon metabolism (ko01200);; Peroxisome (ko04146)
gene_Bol037085	gene_Bol037085	--	0.271694	0.364676	0.25446	8.61606	7.48365	3.33363	14.1204	22.9374	15.9442	4.10847	up	1.85335	up	K14500|1.3e-274|boe:106305289|K14500 BR-signaling kinase [EC:2.7.11.1] | (RefSeq) probable serine/threonine-protein kinase At4g35230	Plant hormone signal transduction (ko04075)
gene_Bol037101	gene_Bol037101	LOC106304217	0.729487	0	0.785315	7.10396	7.08027	4.2882	8.99458	9.12315	14.8388	3.27994	up	1.3285	up	--	--
gene_Bol037135	gene_Bol037135	--	6.67522	8.79908	8.73769	26.9469	24.0122	28.9912	34.1771	33.2324	34.5485	1.41574	up	0.786584	up	--	--
gene_Bol037141	gene_Bol037141	LOC106303688	1.10468	0.314663	0.681485	92.9149	103.008	43.2226	120.252	94.7372	166.108	6.50008	up	1.15714	up	--	--
gene_Bol037159	gene_Bol037159	LOC106304780	1.00577	0.865193	0.810575	3.2044	2.01369	1.62242	11.6808	5.88983	31.7712	1.04153	up	3.44983	up	K16818|3.4e-92|csat:104784853|K16818 phospholipase A1 [EC:3.1.1.32] | (RefSeq) phospholipase A(1) DAD1, chloroplastic-like	Glycerophospholipid metabolism (ko00564);; alpha-Linolenic acid metabolism (ko00592)
gene_Bol037264	gene_Bol037264	LOC106421409	1.14209	2.09505	1.82162	5.62208	9.17567	3.95575	11.1663	3.6061	41.3366	1.58203	up	2.22262	up	K15688|8.2e-07|ath:AT1G59560|K15688 E3 ubiquitin-protein ligase MUL1 [EC:2.3.2.27] | (RefSeq) ZCF61; E3 Ubiquitin ligase family protein	--
gene_Bol037353	gene_Bol037353	--	33.5898	46.9981	45.8747	124.424	139.99	139.1	161.012	132.891	162.301	1.36922	up	0.621086	up	--	--
gene_Bol037364	gene_Bol037364	LOC106310048	0.174417	0.189241	0.121646	5.50712	4.59185	4.03122	8.81912	6.42598	11.3688	4.50544	up	1.39797	up	K00924|0.0e+00|boe:106310048|K00924 kinase [EC:2.7.1.-] | (RefSeq) CDPK-related kinase 6-like	--
gene_Bol037384	gene_Bol037384	LOC106444911	193.14	114.837	140.795	570.712	595.695	261.157	669.621	494.24	1177.98	1.38741	up	1.23849	up	K00430|4.3e-189|bna:106444911|K00430 peroxidase [EC:1.11.1.7] | (RefSeq) peroxidase 34-like precursor	Phenylpropanoid biosynthesis (ko00940)
gene_Bol037404	gene_Bol037404	LOC106310857	53.477	47.4967	65.2756	180.326	189.718	152.881	245.512	185.137	474.31	1.35413	up	1.33132	up	K17278|2.4e-119|boe:106310857|K17278 membrane-associated progesterone receptor component | (RefSeq) membrane steroid-binding protein 2	--
gene_Bol037722	gene_Bol037722	LOC106342196	16.8872	14.0611	13.4336	63.8617	56.8656	33.0359	86.0434	68.3526	121.927	1.50337	up	1.33759	up	K08712|7.9e-63|gsl:Gasu_29800|K08712 ATP-binding cassette, subfamily G (WHITE), member 2, SNQ2 | (RefSeq) ABC transporter, ATP-binding protein	ABC transporters (ko02010)
gene_Bol037756	gene_Bol037756	LOC106340273	19.0281	23.2856	14.1127	52.1023	57.5626	39.8526	234.225	91.8902	965.447	1.10817	up	3.76758	up	--	--
gene_Bol037786	gene_Bol037786	LOC106365622	56.031	65.5163	80.4985	196.488	209.087	171.751	231.823	217.52	201.761	1.21182	up	0.588595	up	K14165|5.1e-97|sly:101265264|K14165 atypical dual specificity phosphatase [EC:3.1.3.16 3.1.3.48] | (RefSeq) putative dual specificity protein phosphatase DSP8	--
gene_Bol037879	gene_Bol037879	--	2.02391	2.5652	4.32439	11.7726	14.0075	6.0536	14.2644	9.09371	36.0159	1.53037	up	1.47857	up	K07198|1.4e-138|atr:18425660|K07198 5'-AMP-activated protein kinase, catalytic alpha subunit [EC:2.7.11.11] | (RefSeq) CBL-interacting protein kinase 5	--
gene_Bol037923	gene_Bol037923	LOC106339947	0.331796	1.19238	1.64571	44.1141	40.3256	31.2963	66.8552	100.186	49.9593	4.85107	up	1.27224	up	K00521|1.7e-31|cmos:111447866|K00521 ferric-chelate reductase [EC:1.16.1.7] | (RefSeq) ferric reduction oxidase 7, chloroplastic-like	--
gene_Bol037955	gene_Bol037955	--	0	0	0	14.8597	10.0126	3.61072	25.5955	8.61454	71.9535	8.78201	up	2.51186	up	K08511|5.0e-30|bna:106450139|K08511 vesicle-associated membrane protein 72 | (RefSeq) vesicle-associated membrane protein 722-like	--
gene_Bol038051	gene_Bol038051	LOC111213092	1.62308	2.3448	3.36513	8.38593	9.05852	8.89741	18.1019	12.2539	21.4324	1.52327	up	1.45226	up	--	--
gene_Bol038052	gene_Bol038052	--	0.955884	0.65901	0.107213	60.3268	61.3206	12.9255	879.006	61.5639	757.243	5.97372	up	4.14848	up	K00430|2.2e-137|bna:111213093|K00430 peroxidase [EC:1.11.1.7] | (RefSeq) peroxidase 4-like	Phenylpropanoid biosynthesis (ko00940)
gene_Bol038057	gene_Bol038057	--	0.621764	0.703369	0.938981	9.49889	5.00403	4.90483	14.7402	12.3633	21.2376	2.75406	up	1.80897	up	K14491|5.2e-09|ath:AT3G62670|K14491 two-component response regulator ARR-B family | (RefSeq) RR20; two-component response regulator	Plant hormone signal transduction (ko04075)
gene_Bol038103	gene_Bol038103	--	70.2185	123.179	241.376	453.519	425.767	278.403	494.319	985.153	1767.11	1.09697	up	2.03683	up	--	--
gene_Bol038106	gene_Bol038106	LOC106292796	9.1149	12.4376	21.5756	41.8853	35.983	37.6279	94.3918	60.6942	150.989	1.10519	up	1.93185	up	K08730|5.6e-247|bna:106439980|K08730 phosphatidylserine synthase 2 [EC:2.7.8.29] | (RefSeq) CDP-diacylglycerol--serine O-phosphatidyltransferase 1 isoform X1	Glycerophospholipid metabolism (ko00564)
gene_Bol038118	gene_Bol038118	--	52.437	29.0591	25.6834	191.87	165.271	135.764	158.974	250.615	319.194	1.91943	up	1.05548	up	K08712|4.9e-46|qsu:112001375|K08712 ATP-binding cassette, subfamily G (WHITE), member 2, SNQ2 | (RefSeq) ABC transporter ATP-binding protein/permease PDR18-like	ABC transporters (ko02010)
gene_Bol038135	gene_Bol038135	LOC106292708	32.4591	73.3052	122.717	565.827	608.184	425.991	754.92	1019.56	1172.66	2.49143	up	1.34684	up	--	--
gene_Bol038136	gene_Bol038136	LOC106294053	0	0	0.217278	20.4517	22.1474	17.8757	52.2962	21.3578	110.314	7.48807	up	2.18316	up	--	--
gene_Bol038158	gene_Bol038158	LOC106292746	6.338	9.41737	6.50196	53.1186	57.7866	83.2904	73.279	146.322	49.9148	2.81648	up	0.812763	up	--	--
gene_Bol038200	gene_Bol038200	LOC106395522	13.6856	8.05499	5.29974	46.2078	71.1227	82.6632	102.253	48.4435	258.365	2.60185	up	1.63296	up	K23544|3.1e-103|brp:103842861|K23544 serine incorporator 1/3 | (RefSeq) serine incorporator 3	--
gene_Bol038205	gene_Bol038205	--	4.43645	4.78666	4.07769	9.17146	8.54802	9.06352	15.2231	15.5699	20.6306	0.709023	up	1.41294	up	K04424|2.9e-40|psom:113317025|K04424 sterile alpha motif and leucine zipper containing kinase AZK [EC:2.7.11.25] | (RefSeq) probable serine/threonine-protein kinase SIS8	--
gene_Bol038208	gene_Bol038208	LOC106292581	1.79942	2.63544	4.05128	9.85134	8.01101	5.23588	11.8213	8.90253	13.6648	1.13343	up	1.03923	up	K00134|7.6e-239|bna:106390166|K00134 glyceraldehyde 3-phosphate dehydrogenase [EC:1.2.1.12] | (RefSeq) glyceraldehyde-3-phosphate dehydrogenase GAPCP2, chloroplastic	Glycolysis / Gluconeogenesis (ko00010);; Carbon fixation in photosynthetic organisms (ko00710);; Carbon metabolism (ko01200);; Biosynthesis of amino acids (ko01230)
gene_Bol038233	gene_Bol038233	LOC106293306	7.39127	5.9525	8.60827	15.3796	15.947	12.8678	18.385	44.6298	37.9614	0.708231	up	1.64216	up	K14488|1.1e-77|boe:106293306|K14488 SAUR family protein | (RefSeq) auxin-responsive protein SAUR41	Plant hormone signal transduction (ko04075)
gene_Bol038246	gene_Bol038246	--	9.63172	7.69756	12.2046	26.6559	24.8845	18.2796	66.424	49.3852	154.724	0.943257	up	2.51793	up	--	--
gene_Bol038276	gene_Bol038276	--	2.21817	2.66736	1.87416	4.24254	4.29075	4.32275	6.8799	5.06852	5.75152	0.629605	up	0.885276	up	--	--
gene_Bol038290	gene_Bol038290	LOC106343276	31.9528	15.764	17.3194	54.6619	67.0654	38.3084	66.0412	60.1058	86.4543	1.0188	up	0.877998	up	--	--
gene_Bol038372	gene_Bol038372	LOC106296194	4.72117	5.842	5.20712	11.9339	11.4037	12.1374	13.8069	12.5496	15.0805	0.865628	up	0.672966	up	K00759|6.8e-15|aip:107609884|K00759 adenine phosphoribosyltransferase [EC:2.4.2.7] | (RefSeq) uncharacterized protein LOC107609884	Purine metabolism (ko00230)
gene_Bol038484	gene_Bol038484	--	301.698	579.255	630.895	5029.48	4715.11	2591.93	5747.71	4883.8	6137.36	2.72251	up	0.890165	up	K03327|1.1e-06|cic:CICLE_v10018703mg|K03327 multidrug resistance protein, MATE family | (RefSeq) hypothetical protein	--
gene_Bol038517	gene_Bol038517	--	10.7729	14.2167	10.8786	29.1248	27.1207	28.218	33.1251	31.0622	32.1042	0.933834	up	0.619149	up	K02726|3.2e-138|bna:106354769|K02726 20S proteasome subunit alpha 2 [EC:3.4.25.1] | (RefSeq) proteasome subunit alpha type-2-A	Proteasome (ko03050)
gene_Bol038524	gene_Bol038524	LOC106299853	14.7697	11.7939	10.5323	30.4732	25.922	30.3697	37.0751	31.0763	29.7855	0.930886	up	0.590538	up	K09291|0.0e+00|boe:106299853|K09291 nucleoprotein TPR | (RefSeq) nuclear-pore anchor	RNA transport (ko03013)
gene_Bol038589	gene_Bol038589	--	0.186797	0.027321	0.041225	49.1407	40.5901	12.3157	179.983	60.6831	260.194	8.28322	up	2.83007	up	--	--
gene_Bol038597	gene_Bol038597	LOC106295272	339.976	412.339	427.908	882.986	857.773	501.813	968.164	932.403	737.968	0.628426	up	0.629488	up	K13811|9.9e-269|bna:106357712|K13811 3'-phosphoadenosine 5'-phosphosulfate synthase [EC:2.7.7.4 2.7.1.25] | (RefSeq) ATP sulfurylase 1, chloroplastic-like isoform X2	Purine metabolism (ko00230);; Monobactam biosynthesis (ko00261);; Selenocompound metabolism (ko00450);; Sulfur metabolism (ko00920)
gene_Bol038644	gene_Bol038644	LOC106435969	17.1587	21.5487	19.4386	96.1519	82.3	77.1391	131.515	133.863	179.954	1.83427	up	1.27428	up	K00863|1.4e-291|bna:106360538|K00863 triose/dihydroxyacetone kinase / FAD-AMP lyase (cyclizing) [EC:2.7.1.28 2.7.1.29 4.6.1.15] | (RefSeq) putative 3,4-dihydroxy-2-butanone kinase	Fructose and mannose metabolism (ko00051);; Glycerolipid metabolism (ko00561);; Carbon metabolism (ko01200)
gene_Bol038667	gene_Bol038667	--	13.2165	9.62423	14.4527	66.9079	64.3981	66.4031	73.6362	84.1182	82.4503	2.10618	up	0.717041	up	K07198|1.1e-134|bna:106422911|K07198 5'-AMP-activated protein kinase, catalytic alpha subunit [EC:2.7.11.11] | (RefSeq) CBL-interacting serine/threonine-protein kinase 1	--
gene_Bol038678	gene_Bol038678	LOC106343313	51.0609	49.3355	47.9707	112.295	97.728	92.586	134.539	112.596	179.394	0.73049	up	0.978606	up	K13436|2.3e-212|bna:106418522|K13436 pto-interacting protein 1 [EC:2.7.11.1] | (RefSeq) pto-interacting protein 1-like	Plant-pathogen interaction (ko04626)
gene_Bol038764	gene_Bol038764	LOC106304207	5.27669	3.31207	2.52708	43.7963	44.7284	22.9128	49.3112	40.14	117.531	3.03806	up	1.45209	up	K11819|2.3e-60|bna:106380686|K11819 S-alkyl-thiohydroximate lyase SUR1 [EC:4.4.1.-] | (RefSeq) S-alkyl-thiohydroximate lyase SUR1-like isoform X2	Tryptophan metabolism (ko00380);; Glucosinolate biosynthesis (ko00966);; 2-Oxocarboxylic acid metabolism (ko01210)
gene_Bol038765	gene_Bol038765	LOC106304207	1.15519	2.70216	2.39872	28.7981	41.4881	23.4695	53.3568	47.407	138.92	3.59244	up	1.91946	up	K11819|2.3e-60|bna:106380686|K11819 S-alkyl-thiohydroximate lyase SUR1 [EC:4.4.1.-] | (RefSeq) S-alkyl-thiohydroximate lyase SUR1-like isoform X2	Tryptophan metabolism (ko00380);; Glucosinolate biosynthesis (ko00966);; 2-Oxocarboxylic acid metabolism (ko01210)
gene_Bol038767	gene_Bol038767	--	18.25	19.5525	15.541	230.728	250.104	119.782	330.697	259.987	681.801	3.20403	up	1.62587	up	K11819|6.7e-237|bna:106380686|K11819 S-alkyl-thiohydroximate lyase SUR1 [EC:4.4.1.-] | (RefSeq) S-alkyl-thiohydroximate lyase SUR1-like isoform X2	Tryptophan metabolism (ko00380);; Glucosinolate biosynthesis (ko00966);; 2-Oxocarboxylic acid metabolism (ko01210)
gene_Bol038811	gene_Bol038811	--	0.641104	0.084969	0.364024	7.02043	6.12402	4.44803	43.9164	10.0958	20.736	3.69655	up	2.483	up	K01773|7.7e-134|pop:7480951|K01773 aldoxime dehydratase [EC:4.99.1.-] | (RefSeq) cytochrome P450 71B36	--
gene_Bol038832	gene_Bol038832	LOC106385406	0	0	0	2.35028	2.79772	1.46293	12.7231	5.49945	6.25246	7.62531	up	2.25173	up	K13066|5.5e-118|bna:106385406|K13066 caffeic acid 3-O-methyltransferase [EC:2.1.1.68] | (RefSeq) flavone 3'-O-methyltransferase 1-like	Phenylpropanoid biosynthesis (ko00940)
gene_Bol038834	gene_Bol038834	LOC106385406	0	0	0	2.68285	2.81491	1.72773	21.6128	11.1864	5.99047	8.54641	up	2.73911	up	K13066|9.1e-209|bna:106385406|K13066 caffeic acid 3-O-methyltransferase [EC:2.1.1.68] | (RefSeq) flavone 3'-O-methyltransferase 1-like	Phenylpropanoid biosynthesis (ko00940)
gene_Bol038880	gene_Bol038880	LOC17876365	22.8239	26.1353	21.1987	57.1974	45.377	64.6158	71.2536	56.5073	70.4537	0.947783	up	0.693402	up	K11251|4.9e-64|bna:111210538|K11251 histone H2A | (RefSeq) histone H2A.6	--
gene_Bol038893	gene_Bol038893	--	1.39074	2.37693	2.80463	36.415	31.9316	33.5469	48.2795	44.9449	42.6444	3.63798	up	0.835341	up	--	--
gene_Bol038902	gene_Bol038902	--	8.67789	4.21759	6.1679	22.052	23.7776	20.2919	27.4489	23.2683	27.1012	1.50554	up	0.671773	up	K15283|5.3e-213|boe:106312838|K15283 solute carrier family 35, member E1 | (RefSeq) glucose-6-phosphate/phosphate translocator 1, chloroplastic	--
gene_Bol038903	gene_Bol038903	LOC106319040	137.817	93.8483	114.082	461.445	479.835	218.854	479.489	575.13	725.799	1.46097	up	1.08702	up	K01696|8.5e-268|bna:106390556|K01696 tryptophan synthase beta chain [EC:4.2.1.20] | (RefSeq) tryptophan synthase beta chain 1, chloroplastic	Glycine, serine and threonine metabolism (ko00260);; Phenylalanine, tyrosine and tryptophan biosynthesis (ko00400);; Biosynthesis of amino acids (ko01230)
gene_Bol038995	gene_Bol038995	LOC106296385	6.33897	5.4974	7.65976	29.2237	31.1506	31.6278	37.8153	37.6552	30.6374	1.93607	up	0.607924	up	--	--
gene_Bol039067	gene_Bol039067	--	1.81101	1.55129	2.7645	31.179	27.1862	29.6908	75.3837	66.056	30.6418	3.52635	up	1.30572	up	--	--
gene_Bol039084	gene_Bol039084	--	7.66852	8.47018	10.291	17.8414	14.4432	17.498	22.806	20.9658	26.5928	0.605891	up	0.959018	up	K02729|2.4e-127|bna:106367639|K02729 20S proteasome subunit alpha 5 [EC:3.4.25.1] | (RefSeq) proteasome subunit alpha type-5-A-like	Proteasome (ko03050)
gene_Bol039099	gene_Bol039099	LOC106299586	0.226947	0	0	35.3112	14.1556	22.7274	72.4741	20.5114	147.591	7.51684	up	2.334	up	--	--
gene_Bol039116	gene_Bol039116	LOC106300748	7.26642	5.91068	7.92055	15.7045	13.5533	14.5755	29.5304	21.2577	62.5428	0.753233	up	1.92891	up	K21396|8.3e-53|gsl:Gasu_36200|K21396 ATP-binding cassette, subfamily G (WHITE), eye pigment precursor transporter | (RefSeq) ABC transporter, ATP-binding protein	--
gene_Bol039152	gene_Bol039152	LOC106404343	0	0.161387	0.228158	3.43177	3.98837	2.58444	17.0472	7.68984	5.54503	4.31809	up	1.93213	up	K19562|3.7e-194|bna:106404343|K19562 bifunctional dethiobiotin synthetase / adenosylmethionine---8-amino-7-oxononanoate aminotransferase [EC:6.3.3.3 2.6.1.62] | (RefSeq) bifunctional dethiobiotin synthetase/7,8-diamino-pelargonic acid aminotransferase, mitochondrial-like	Biotin metabolism (ko00780)
gene_Bol039198	gene_Bol039198	LOC106404842	2.75712	4.06631	2.61502	8.86177	7.47976	6.51792	22.2909	17.6657	10.5692	0.970848	up	1.50014	up	K13993|1.3e-128|bna:106404842|K13993 HSP20 family protein | (RefSeq) 26.5 kDa heat shock protein, mitochondrial isoform X1	Protein processing in endoplasmic reticulum (ko04141)
gene_Bol039200	gene_Bol039200	LOC106404723	2.03092	2.02521	2.64451	17.2341	18.2448	9.48981	34.7864	25.1351	60.5362	2.44049	up	1.94406	up	K13416|1.2e-63|boe:106306477|K13416 brassinosteroid insensitive 1-associated receptor kinase 1 [EC:2.7.10.1 2.7.11.1] | (RefSeq) BRASSINOSTEROID INSENSITIVE 1-associated receptor kinase 1-like isoform X1	MAPK signaling pathway - plant (ko04016);; Plant hormone signal transduction (ko04075);; Plant-pathogen interaction (ko04626)
gene_Bol039217	gene_Bol039217	LOC106376726	6.91491	6.67447	6.6435	17.4906	20.6559	10.4291	45.2755	9.62881	32.6251	0.973616	up	1.30058	up	K17637|0.0e+00|bna:106376726|K17637 exocyst complex component 2 | (RefSeq) exocyst complex component SEC5A	--
gene_Bol039223	gene_Bol039223	--	4.29981	5.6689	6.30161	16.2471	23.6614	14.9355	33.5368	20.0581	19.7878	1.45057	up	0.806801	up	--	--
gene_Bol039262	gene_Bol039262	BNAANNG21350D	0	0	0.066391	5.33051	5.11393	2.16279	21.5298	11.7083	59.2375	7.02014	up	3.46896	up	--	--
gene_Bol039330	gene_Bol039330	--	1.35361	1.58422	0.722685	14.1096	9.06216	9.45338	46.1393	17.7512	20.4393	2.83571	up	1.75113	up	K21888|1.0e-117|boe:106322741|K21888 glutathione dehydrogenase/transferase [EC:1.8.5.1 2.5.1.18] | (RefSeq) glutathione S-transferase DHAR2 isoform X1	Ascorbate and aldarate metabolism (ko00053);; Glutathione metabolism (ko00480)
gene_Bol039346	gene_Bol039346	--	18.6365	21.802	24.5895	62.5601	63.3247	52.3267	81.7668	91.2705	105.517	1.15315	up	1.10043	up	K13513|4.1e-198|boe:106322546|K13513 lysocardiolipin and lysophospholipid acyltransferase [EC:2.3.1.- 2.3.1.51] | (RefSeq) probable 1-acyl-sn-glycerol-3-phosphate acyltransferase 4	Glycerolipid metabolism (ko00561);; Glycerophospholipid metabolism (ko00564)
gene_Bol039366	gene_Bol039366	--	0.869607	3.59974	2.14978	135.895	98.4334	51.3858	583.531	166.709	63.9433	5.10079	up	1.78184	up	K00799|1.9e-127|bna:106430242|K00799 glutathione S-transferase [EC:2.5.1.18] | (RefSeq) glutathione S-transferase U10	Glutathione metabolism (ko00480)
gene_Bol039400	gene_Bol039400	LOC106325777	0.063326	0	0	1.91743	1.52314	0.974942	5.50855	2.17293	6.30656	5.84933	up	2.14648	up	K01757|4.5e-183|bna:106379410|K01757 strictosidine synthase [EC:4.3.3.2] | (RefSeq) protein STRICTOSIDINE SYNTHASE-LIKE 11-like	Indole alkaloid biosynthesis (ko00901)
gene_Bol039454	gene_Bol039454	LOC106307170	106.263	92.4841	98.8314	201.309	181.105	215.402	262.006	233.975	680.476	0.706891	up	1.55051	up	K17987|0.0e+00|boe:106307170|K17987 next to BRCA1 gene 1 protein | (RefSeq) uncharacterized protein LOC106307170	--
gene_Bol039488	gene_Bol039488	--	2.93442	6.1847	8.19781	18.1347	16.2886	9.98722	34.6168	21.0769	20.4149	1.04686	up	1.16635	up	--	--
gene_Bol039501	gene_Bol039501	LOC106323195	6.63262	10.9141	9.45211	93.3652	82.607	84.0371	129.558	117.512	240.896	2.95908	up	1.43377	up	--	--
gene_Bol039575	gene_Bol039575	--	16.156	14.0981	12.7445	31.8834	28.1375	29.6348	41.5545	28.5863	45.6097	0.763498	up	0.837488	up	K20044|1.7e-297|boe:106314825|K20044 phosphatidylinositol-binding clathrin assembly protein | (RefSeq) putative clathrin assembly protein At4g25940	--
gene_Bol039740	gene_Bol039740	LOC106437898	15.9189	8.87308	11.1406	41.0711	46.9364	37.1914	55.9562	47.4676	105.55	1.51284	up	1.26607	up	--	--
gene_Bol039821	gene_Bol039821	--	5.32651	3.92554	2.38916	17.5697	21.8873	17.5018	44.2135	22.8255	96.5562	2.00455	up	2.09675	up	K03875|3.5e-128|bna:106386040|K03875 F-box and leucine-rich repeat protein 1 (S-phase kinase-associated protein 2) | (RefSeq) F-box protein SKP2B	Ubiquitin mediated proteolysis (ko04120)
gene_Bol039885	gene_Bol039885	--	123.085	138.528	148.808	370.968	371.849	486.46	553.238	542.993	373.085	1.27653	up	0.642206	up	K11253|2.2e-67|adu:107460150|K11253 histone H3 | (RefSeq) histone H3.3	--
gene_Bol039900	gene_Bol039900	LOC106300548	9.84226	8.06342	15.088	29.6728	24.7666	22.9693	35.9387	25.8501	78.5074	0.923539	up	1.41968	up	K03444|2.4e-257|bna:111211443|K03444 MFS transporter, SP family, ERD6-like sugar transporter | (RefSeq) sugar transporter ERD6-like 6	--
gene_Bol040014	gene_Bol040014	LOC106404810	13.7576	11.1617	34.017	3634.75	3502.47	3643.9	8439.17	4733.95	5813.11	7.19779	up	1.23317	up	--	--
gene_Bol040086	gene_Bol040086	--	0.367225	1.19639	0.320444	2.77458	1.98496	3.1785	8.25686	4.02703	9.85676	1.75557	up	1.97322	up	K14638|8.2e-261|boe:106298406|K14638 solute carrier family 15 (peptide/histidine transporter), member 3/4 | (RefSeq) protein NRT1/ PTR FAMILY 5.14-like	--
gene_Bol040091	gene_Bol040091	--	0	0.372743	0.808045	45.718	53.843	86.0879	85.9169	99.2263	91.9047	6.89379	up	1.01069	up	--	--
gene_Bol040145	gene_Bol040145	LOC106340173	8.51666	13.83	24.8292	118.35	80.3183	75.2916	490.546	293.036	1011.35	2.21856	up	3.27784	up	K00318|2.0e-272|bna:106407611|K00318 proline dehydrogenase [EC:1.5.5.2] | (RefSeq) proline dehydrogenase 2, mitochondrial	Arginine and proline metabolism (ko00330)
gene_Bol040197	gene_Bol040197	LOC106340300	8.85889	6.1197	2.20088	51.6789	60.2301	29.5569	67.0605	65.8237	57.9239	2.76467	up	0.837509	up	K01537|1.1e-42|jcu:105638585|K01537 P-type Ca2+ transporter type 2C [EC:7.2.2.10] | (RefSeq) calcium-transporting ATPase 2, plasma membrane-type isoform X1	--
gene_Bol040245	gene_Bol040245	--	0.197123	0	0.681327	2.94657	6.22299	2.23066	14.8833	11.0037	30.3591	3.33264	up	2.83317	up	K04077|1.8e-09|cmos:111455859|K04077 chaperonin GroEL | (RefSeq) chaperonin CPN60-like 2, mitochondrial	RNA degradation (ko03018)
gene_Bol040325	gene_Bol040325	--	4.91354	4.20802	3.89138	10.7159	9.74814	9.37009	12.0783	12.3396	10.4669	0.901932	up	0.636388	up	--	--
gene_Bol040328	gene_Bol040328	--	14.9372	18.0352	17.8896	35.0988	31.1718	31.1893	36.7608	39.1203	39.3826	0.634982	up	0.677442	up	K11844|1.4e-25|cmo:103483482|K11844 ubiquitin carboxyl-terminal hydrolase 16/45 [EC:3.4.19.12] | (RefSeq) ubiquitin carboxyl-terminal hydrolase 2	--
gene_Bol040341	gene_Bol040341	--	12.0116	10.3021	11.5748	71.187	73.0331	84.5832	124.578	115.087	86.6908	2.45501	up	0.902882	up	--	--
gene_Bol040355	gene_Bol040355	LOC106427003	3.29713	3.57332	2.95202	8.38478	7.15989	7.18442	31.5682	9.6941	109.63	0.911813	up	3.38212	up	K05857|0.0e+00|bna:106427003|K05857 phosphatidylinositol phospholipase C, delta [EC:3.1.4.11] | (RefSeq) phosphoinositide phospholipase C 7-like isoform X1	Inositol phosphate metabolism (ko00562);; Phosphatidylinositol signaling system (ko04070)
gene_Bol040373	gene_Bol040373	LOC106343367	6.12174	5.79488	7.37019	21.3531	22.2003	24.6408	30.2175	27.5336	25.7639	1.51766	up	0.708084	up	K10599|5.4e-06|smo:SELMODRAFT_168695|K10599 pre-mRNA-processing factor 19 [EC:2.3.2.27] | (RefSeq) PUB59-2; ubiquitin-protein ligase, PUB59	Spliceosome (ko03040);; Ubiquitin mediated proteolysis (ko04120)
gene_Bol040377	gene_Bol040377	LOC106295158	2.08372	1.62102	2.17633	15.5495	10.5413	5.22668	35.3164	25.9556	27.7524	2.1141	up	1.92325	up	K13415|2.9e-174|psom:113283306|K13415 protein brassinosteroid insensitive 1 [EC:2.7.10.1 2.7.11.1] | (RefSeq) systemin receptor SR160-like	Plant hormone signal transduction (ko04075)
gene_Bol040423	gene_Bol040423	LOC106295427	5.57416	3.92298	3.34461	9.76715	7.80659	9.16889	19.379	15.11	50.5016	0.758518	up	2.24339	up	--	--
gene_Bol040439	gene_Bol040439	--	4.05701	3.11256	4.20104	9.19893	7.68778	7.31097	13.1863	9.21848	10.3049	0.789806	up	0.854896	up	K13754|2.3e-290|bna:106452254|K13754 solute carrier family 24 (sodium/potassium/calcium exchanger), member 6 | (RefSeq) cation/calcium exchanger 3	--
gene_Bol040721	gene_Bol040721	--	0.632833	0.051853	0.984783	10.707	13.4435	12.4076	14.3187	28.5998	8.56148	4.13071	up	0.817385	up	K17500|2.9e-47|nto:104085001|K17500 integrin-linked kinase-associated serine/threonine phosphatase 2C [EC:3.1.3.16] | (RefSeq) WAT1-related protein At3g18200 isoform X1	--
gene_Bol040742	gene_Bol040742	LOC106400094	2.65578	8.80883	4.89646	16.9609	11.5874	18.4496	39.9858	86.5734	453.517	1.20155	up	4.30822	up	K19355|2.3e-240|bna:106400094|K19355 mannan endo-1,4-beta-mannosidase [EC:3.2.1.78] | (RefSeq) mannan endo-1,4-beta-mannosidase 1-like	Fructose and mannose metabolism (ko00051)
gene_Bol040806	gene_Bol040806	LOC106296191	24.4263	25.9361	24.2348	43.6741	45.5421	50.2603	58.2945	56.5597	63.0195	0.601741	up	0.793941	up	--	--
gene_Bol040844	gene_Bol040844	--	0	0.487352	0.144299	4.09808	1.40788	1.23184	9.57358	8.64856	25.1028	3.00018	up	3.26108	up	K23047|7.4e-156|bna:106397921|K23047 E3 ubiquitin-protein ligase UNKL [EC:2.3.2.27] | (RefSeq) zinc finger CCCH domain-containing protein 2	--
gene_Bol040940	gene_Bol040940	BNAC05G02970D	64.6601	61.1222	68.2398	152.555	133.556	151.81	148.799	175.536	177.713	0.872829	up	0.641803	up	--	--
gene_Bol040945	gene_Bol040945	LOC103844186	7.27526	5.35751	9.37313	31.2719	22.2246	36.653	41.6099	33.7643	87.1637	1.72222	up	1.40292	up	K18045|1.6e-120|bna:106423690|K18045 tyrosine-protein phosphatase SIW14 [EC:3.1.3.48] | (RefSeq) probable tyrosine-protein phosphatase At1g05000	--
gene_Bol040977	gene_Bol040977	--	0.551982	2.7233	0.756116	14.2959	14.6564	23.5686	60.73	33.0752	53.5912	3.3788	up	1.94293	up	K20283|7.8e-21|cpap:110821806|K20283 golgin subfamily A member 4 | (RefSeq) myosin-9	--
gene_Bol041027	gene_Bol041027	LOC106294886	5.16221	4.93436	4.99602	9.3334	19.139	6.89508	21.2434	27.948	143.217	0.945168	up	3.08867	up	K11968|1.0e-303|boe:106294886|K11968 ariadne-1 [EC:2.3.2.31] | (RefSeq) probable E3 ubiquitin-protein ligase ARI12 isoform X1	--
gene_Bol041048	gene_Bol041048	LOC106295107	0.130394	0	0.0505	2.46818	3.09879	1.97641	15.3912	13.9034	2.17512	4.91283	up	2.3149	up	K16818|3.2e-45|dzi:111313258|K16818 phospholipase A1 [EC:3.1.1.32] | (RefSeq) phospholipase A(1) DAD1, chloroplastic-like	Glycerophospholipid metabolism (ko00564);; alpha-Linolenic acid metabolism (ko00592)
gene_Bol041052	gene_Bol041052	--	65.4499	84.9972	84.8351	147.584	160.723	170.128	207.841	261.491	317.224	0.71949	up	1.18942	up	K00232|0.0e+00|brp:103844049|K00232 acyl-CoA oxidase [EC:1.3.3.6] | (RefSeq) acyl-coenzyme A oxidase 3, peroxisomal	Fatty acid degradation (ko00071);; beta-Alanine metabolism (ko00410);; alpha-Linolenic acid metabolism (ko00592);; Propanoate metabolism (ko00640);; Biosynthesis of unsaturated fatty acids (ko01040);; Carbon metabolism (ko01200);; Fatty acid metabolism (ko01212);; Peroxisome (ko04146)
gene_Bol041085	gene_Bol041085	LOC106401874	5.48373	2.19368	1.02385	14.7565	13.6978	11.0924	22.0728	15.6136	31.479	1.91547	up	1.30783	up	K13430|1.1e-61|dct:110101514|K13430 serine/threonine-protein kinase PBS1 [EC:2.7.11.1] | (RefSeq) serine/threonine-protein kinase PBS1	Plant-pathogen interaction (ko04626)
gene_Bol041097	gene_Bol041097	--	132.347	197.706	342.007	842.159	710.714	754.395	1060.89	980.699	768.957	1.46232	up	0.680961	up	--	--
gene_Bol041113	gene_Bol041113	LOC106400982	43.9957	56.5261	64.3096	105.819	104.868	115.098	146.387	116.489	107.609	0.675582	up	0.591977	up	K01114|4.2e-311|bna:106400982|K01114 phospholipase C [EC:3.1.4.3] | (RefSeq) non-specific phospholipase C1-like	Inositol phosphate metabolism (ko00562);; Glycerophospholipid metabolism (ko00564);; Ether lipid metabolism (ko00565)
gene_Bol041142	gene_Bol041142	--	1.60668	1.49712	1.29747	19.198	18.1144	13.4635	36.4114	24.3627	11.5661	3.23247	up	0.833298	up	K03979|4.5e-08|mis:MICPUN_76499|K03979 GTPase [EC:3.6.5.-] | (RefSeq) predicted protein	--
gene_Bol041178	gene_Bol041178	LOC106294548	1.10098	1.78982	3.95405	10.8469	7.71005	13.0368	51.8575	11.2756	25.3808	1.87547	up	1.89687	up	--	--
gene_Bol041197	gene_Bol041197	LOC106343255	25.3855	22.7489	24.5938	64.9671	65.0002	78.8856	90.3759	87.2067	89.5898	1.2214	up	0.789049	up	K12196|3.9e-235|bna:106415797|K12196 vacuolar protein-sorting-associated protein 4 | (RefSeq) protein SUPPRESSOR OF K(+) TRANSPORT GROWTH DEFECT 1-like	Endocytosis (ko04144)
gene_Bol041200	gene_Bol041200	LOC106343406	3.15029	3.0628	2.88874	16.7212	16.9718	16.8982	25.3406	25.9527	43.0825	2.1756	up	1.40254	up	K02952|2.0e-08|aip:107648613|K02952 small subunit ribosomal protein S13 | (RefSeq) 30S ribosomal protein S13, chloroplastic-like	Ribosome (ko03010)
gene_Bol041245	gene_Bol041245	--	6.76398	1.25165	2.48356	14.8625	14.2032	11.738	58.8672	33.1238	89.1012	1.68563	up	2.67275	up	K03444|3.2e-215|boe:106292848|K03444 MFS transporter, SP family, ERD6-like sugar transporter | (RefSeq) sugar transporter ERD6-like 3	--
gene_Bol041335	gene_Bol041335	LOC106334521	73.5231	94.1755	138.829	350.655	354.396	291.284	559.476	503.337	676.579	1.3923	up	1.26676	up	K00253|9.2e-234|bna:106347503|K00253 isovaleryl-CoA dehydrogenase [EC:1.3.8.4] | (RefSeq) isovaleryl-CoA dehydrogenase, mitochondrial	Valine, leucine and isoleucine degradation (ko00280)
gene_Bol041351	gene_Bol041351	LOC106333999	3.17068	1.84431	1.62706	29.3593	29.0026	18.9508	50.8735	41.8811	45.3189	3.24621	up	1.26123	up	K14638|3.2e-89|csat:104711020|K14638 solute carrier family 15 (peptide/histidine transporter), member 3/4 | (RefSeq) protein NRT1/ PTR FAMILY 2.3-like	--
gene_Bol041352	gene_Bol041352	LOC106333999	5.20015	1.86209	1.6863	20.7722	27.6116	23.9919	46.1358	38.6991	35.8575	2.76921	up	1.14315	up	K14638|3.0e-82|csat:104711020|K14638 solute carrier family 15 (peptide/histidine transporter), member 3/4 | (RefSeq) protein NRT1/ PTR FAMILY 2.3-like	--
gene_Bol041436	gene_Bol041436	--	7.07214	8.0044	14.2508	87.4199	95.0031	70.463	178.398	137.753	97.9052	2.79622	up	1.08065	up	--	--
gene_Bol041437	gene_Bol041437	LOC106301760	38.5125	43.0549	55.92	137.252	130.536	120.922	148.542	174.221	129.893	1.19436	up	0.62166	up	K00472|4.2e-153|bna:106446575|K00472 prolyl 4-hydroxylase [EC:1.14.11.2] | (RefSeq) prolyl 4-hydroxylase 5	Arginine and proline metabolism (ko00330)
gene_Bol041439	gene_Bol041439	--	35.7732	40.4555	29.6865	108.548	109.022	121.336	161.035	152.404	88.2779	1.37981	up	0.607591	up	K00924|3.1e-29|smo:SELMODRAFT_131679|K00924 kinase [EC:2.7.1.-] | (RefSeq) hypothetical protein	--
gene_Bol041754	gene_Bol041754	LOC106306854	10.128	11.6131	15.7158	55.7486	51.9256	42.4116	86.8968	61.0452	70.1082	1.69478	up	0.961194	up	K09775|5.3e-87|bna:106425448|K09775 uncharacterized protein | (RefSeq) uncharacterized protein LOC106425448	--
gene_Bol041763	gene_Bol041763	--	8.01372	20.1374	18.4309	46.7052	50.8923	46.5293	76.2853	56.5281	66.3004	1.31662	up	0.894872	up	--	--
gene_Bol042046	gene_Bol042046	LOC106301565	28.5863	8.15259	7.13024	1481.1	1187.71	680.371	1743.31	1791.42	1731.32	5.9898	up	1.07897	up	K20770|1.1e-114|gab:108483715|K20770 (+)-delta-cadinene 8-hydroxylase [EC:1.14.-.-] | (RefSeq) flavonoid 3'-monooxygenase-like	--
gene_Bol042051	gene_Bol042051	--	10.316	3.69174	4.78977	19.1429	22.052	17.5566	32.4981	22.7103	38.2774	1.3644	up	1.14262	up	--	--
gene_Bol042083	gene_Bol042083	LOC106398281	1.40229	2.12159	1.22201	28.5259	24.9443	16.1399	70.7755	49.7676	145.413	3.57209	up	2.486	up	K24104|7.7e-102|thj:104799061|K24104 GPN-loop GTPase | (RefSeq) LOW QUALITY PROTEIN: uncharacterized protein LOC104799061	--
gene_Bol042086	gene_Bol042086	LOC103861370	4.93281	4.67943	4.84483	13.6117	12.7404	8.05357	41.1224	16.8921	86.0659	0.955811	up	2.64554	up	K24104|3.5e-102|thj:104799061|K24104 GPN-loop GTPase | (RefSeq) LOW QUALITY PROTEIN: uncharacterized protein LOC104799061	--
gene_Bol042096	gene_Bol042096	--	2.28461	1.72239	2.27345	30.0806	24.4505	15.3576	46.8474	36.9676	50.2608	3.16479	up	1.39237	up	K22378|4.7e-85|bna:106440523|K22378 E3 ubiquitin-protein ligase RNF181 [EC:2.3.2.27] | (RefSeq) E3 ubiquitin-protein ligase At3g02290-like	--
gene_Bol042105	gene_Bol042105	LOC106304328	0.650835	0.989568	2.3297	81.6226	72.1559	31.0379	195.452	113.269	206.722	5.21787	up	1.94734	up	K13426|1.2e-166|boe:106304328|K13426 WRKY transcription factor 29 | (RefSeq) probable WRKY transcription factor 29	MAPK signaling pathway - plant (ko04016);; Plant-pathogen interaction (ko04626)
gene_Bol042183	gene_Bol042183	LOC106303815	9.15105	7.75038	9.70703	19.7933	23.1326	22.0369	28.5986	26.0975	36.6531	0.985973	up	0.96091	up	K08678|1.6e-12|gmx:100779584|K08678 UDP-glucuronate decarboxylase [EC:4.1.1.35] | (RefSeq) valine--tRNA ligase isoform X1	Amino sugar and nucleotide sugar metabolism (ko00520)
gene_Bol042187	gene_Bol042187	LOC106305319	49.2173	51.5485	46.0582	113.184	103.285	115.216	163.799	114.135	266.022	0.875901	up	1.23767	up	K17987|0.0e+00|boe:106305319|K17987 next to BRCA1 gene 1 protein | (RefSeq) uncharacterized protein LOC106305319	--
gene_Bol042223	gene_Bol042223	--	2.70514	3.21043	3.8078	113.143	107.498	64.6815	203.337	156.162	258.563	4.57221	up	1.59355	up	K05658|1.1e-102|cpep:111781709|K05658 ATP-binding cassette, subfamily B (MDR/TAP), member 1 [EC:7.6.2.2] | (RefSeq) uncharacterized protein LOC111781709	ABC transporters (ko02010)
gene_Bol042270	gene_Bol042270	LOC106409597	0	0	0	11.8672	6.5246	0.854436	22.061	26.2186	46.9113	10.0826	up	2.82428	up	--	--
gene_Bol042297	gene_Bol042297	LOC103861636	42.0587	41.5612	38.2918	81.1116	75.367	80.5528	85.2163	91.5347	87.3179	0.66064	up	0.584985	up	K06268|2.3e-125|bna:106409357|K06268 serine/threonine-protein phosphatase 2B regulatory subunit | (RefSeq) calcineurin B-like protein 3 isoform X2	--
gene_Bol042374	gene_Bol042374	LOC106305402	2.62459	2.60273	3.15729	21.0687	23.4339	14.3887	83.0759	42.0513	158.579	2.49595	up	2.82033	up	--	--
gene_Bol042425	gene_Bol042425	--	111.939	131.149	166.761	555.647	571.367	575.301	676.961	706.38	632.053	1.74805	up	0.662561	up	K00383|4.0e-276|bna:106415434|K00383 glutathione reductase (NADPH) [EC:1.8.1.7] | (RefSeq) glutathione reductase, cytosolic-like	Glutathione metabolism (ko00480)
gene_Bol042502	gene_Bol042502	--	87.9391	59.32	54.2123	266.732	298.296	151.758	341.989	294.865	500.135	1.55003	up	1.15414	up	K01609|1.4e-221|boe:106334942|K01609 indole-3-glycerol phosphate synthase [EC:4.1.1.48] | (RefSeq) indole-3-glycerol phosphate synthase, chloroplastic	Phenylalanine, tyrosine and tryptophan biosynthesis (ko00400);; Biosynthesis of amino acids (ko01230)
gene_Bol042602	gene_Bol042602	LOC106331528	71.2059	51.1647	58.1136	433.506	495.08	212.448	530.217	542.937	965.37	2.37568	up	1.34343	up	K00860|1.5e-158|bna:106416260|K00860 adenylylsulfate kinase [EC:2.7.1.25] | (RefSeq) adenylyl-sulfate kinase 1, chloroplastic	Purine metabolism (ko00230);; Sulfur metabolism (ko00920)
gene_Bol042702	gene_Bol042702	--	4.90307	2.84551	4.31913	9.49786	8.88945	9.16511	11.0056	11.9941	13.4313	0.892973	up	0.853085	up	K16075|2.1e-223|bna:106390317|K16075 magnesium transporter | (RefSeq) magnesium transporter MRS2-5	--
gene_Bol042775	gene_Bol042775	LOC106304097	0.853677	1.14138	1.32278	17.4386	14.656	10.1054	64.6781	48.0685	123.549	3.34017	up	3.02328	up	--	--
gene_Bol042782	gene_Bol042782	LOC106306551	44.8263	36.3986	39.2712	133.64	136.497	156.38	279.762	272.879	363.158	1.52624	up	1.57218	up	K10614|3.9e-19|cvr:CHLNCDRAFT_57991|K10614 E3 ubiquitin-protein ligase HERC3 [EC:2.3.2.26] | (RefSeq) hypothetical protein	Ubiquitin mediated proteolysis (ko04120)
gene_Bol042792	gene_Bol042792	--	2.53806	9.99493	6.32266	58.6968	74.1503	53.4148	207.612	55.7296	177.922	2.99134	up	1.71512	up	K20617|1.3e-103|eus:EUTSA_v10010307mg|K20617 cytochrome P450 family 71 subfamily A | (RefSeq) hypothetical protein	--
gene_Bol042793	gene_Bol042793	LOC106304530	0.1612	0.030217	0.043311	7.30769	10.8084	1.6271	27.5696	27.753	32.9124	6.04441	up	2.59906	up	K20617|1.7e-229|eus:EUTSA_v10010307mg|K20617 cytochrome P450 family 71 subfamily A | (RefSeq) hypothetical protein	--
gene_Bol042794	gene_Bol042794	--	136.258	118.822	83.5653	1381.21	1379.49	642.61	1609.84	1689.35	1233.02	3.04677	up	0.80165	up	K20617|4.5e-172|boe:106298990|K20617 cytochrome P450 family 71 subfamily A | (RefSeq) cytochrome P450 71B5	--
gene_Bol042845	gene_Bol042845	--	4.99845	6.40623	5.90824	25.4001	22.646	14.2861	46.8034	39.407	79.5201	1.55012	up	1.92504	up	--	--
gene_Bol042851	gene_Bol042851	--	2.40866	1.84222	1.94369	7.18846	6.88306	7.58659	7.83409	8.83161	8.66172	1.50087	up	0.658754	up	K15559|2.3e-244|bna:106376974|K15559 regulator of Ty1 transposition protein 103 | (RefSeq) UPF0400 protein C337.03	--
gene_Bol042867	gene_Bol042867	LOC106307066	12.1449	15.1539	13.9405	41.1314	41.7295	49.8345	54.7137	53.3767	45.5325	1.38096	up	0.620551	up	--	--
gene_Bol042889	gene_Bol042889	LOC106349256	15.0213	9.73733	8.04932	67.2416	62.2064	37.2176	78.6273	86.1436	99.223	2.06349	up	1.11639	up	--	--
gene_Bol042891	gene_Bol042891	--	11.0326	8.19973	9.99207	21.247	17.3086	22.4099	30.2974	24.3415	37.7466	0.760144	up	1.07807	up	K02739|1.8e-154|bna:106349255|K02739 20S proteasome subunit beta 2 [EC:3.4.25.1] | (RefSeq) proteasome subunit beta type-7-A	Proteasome (ko03050)
gene_Bol042911	gene_Bol042911	--	0.418365	1.15579	1.23352	5.26721	12.4494	4.93479	23.6047	5.42753	23.5536	2.68744	up	1.70194	up	--	--
gene_Bol042930	gene_Bol042930	LOC106303606	8.71966	6.76808	4.5491	17.5467	18.5036	14.5604	25.9063	25.3145	31.0201	1.0506	up	1.15288	up	K07904|5.6e-24|crb:17879594|K07904 Ras-related protein Rab-11A | (RefSeq) LOW QUALITY PROTEIN: ras and EF-hand domain-containing protein	Endocytosis (ko04144)
gene_Bol043016	gene_Bol043016	LOC106411085	6.31113	8.88152	11.4496	17.017	15.4262	18.5052	22.6343	19.6339	19.4887	0.623329	up	0.699017	up	K22733|3.4e-75|cit:102612526|K22733 magnesium transporter | (RefSeq) uncharacterized protein LOC102612526	--
gene_Bol043031	gene_Bol043031	--	7.14192	4.74268	7.09727	14.4441	13.5369	9.99827	22.2999	16.831	32.4839	0.705506	up	1.41357	up	K14329|4.3e-107|ath:AT5G61160|K14329 agmatine coumaroyltransferase [EC:2.3.1.64 2.3.1.-] | (RefSeq) AACT1; anthocyanin 5-aromatic acyltransferase 1	Arginine and proline metabolism (ko00330)
gene_Bol043040	gene_Bol043040	LOC106307009	2.95243	1.80936	2.56398	7.8983	7.98569	7.91911	9.65941	11.3415	12.4205	1.40503	up	0.941982	up	K14972|0.0e+00|boe:106307009|K14972 PAX-interacting protein 1 | (RefSeq) probable mediator of RNA polymerase II transcription subunit 15c isoform X1	--
gene_Bol043077	gene_Bol043077	LOC106304054	4.67789	4.92688	3.80721	14.1906	14.9428	9.08069	19.4419	13.4673	17.9247	1.21611	up	0.847374	up	K07904|8.9e-122|boe:106304054|K07904 Ras-related protein Rab-11A | (RefSeq) ras-related protein RABA4c	Endocytosis (ko04144)
gene_Bol043078	gene_Bol043078	--	52.3258	54.7048	71.6683	105.121	115.82	116.717	302.592	205.373	514.411	0.613924	up	2.12827	up	--	--
gene_Bol043087	gene_Bol043087	--	855.29	656.762	1494.42	2935.53	2962.39	2663.92	2970.13	3237.73	5442.19	1.20219	up	0.952876	up	--	--
gene_Bol043125	gene_Bol043125	LOC106349002	1.67974	1.28803	0.775296	3.59972	2.95645	3.2661	5.05047	4.17028	4.54183	1.09098	up	0.903148	up	K15161|4.8e-100|bna:106349002|K15161 cyclin-C | (RefSeq) cyclin-C1-1-like	--
gene_Bol043203	gene_Bol043203	--	8.00966	12.8668	8.5204	32.9587	29.5999	12.1531	99.0408	36.2519	110.643	1.05098	up	2.21426	up	--	--
gene_Bol043206	gene_Bol043206	LOC106426408	8.62065	10.4944	7.15724	19.788	23.1742	29.8809	23.3056	37.2139	28.2094	1.16863	up	0.705115	up	K13352|1.9e-07|qsu:111992942|K13352 peroxin-11B | (RefSeq) peroxisomal membrane protein PMP30B-like	Peroxisome (ko04146)
gene_Bol043262	gene_Bol043262	LOC106304776	10.9421	12.0149	13.8428	79.9188	69.5163	91.9765	81.3281	105.08	132.095	2.40115	up	0.880009	up	--	--
gene_Bol043284	gene_Bol043284	LOC106367570	2.51542	1.32603	1.46946	23.692	17.9255	9.16563	49.7817	25.7204	89.8173	2.96752	up	2.25282	up	K23544|2.1e-56|brp:103842861|K23544 serine incorporator 1/3 | (RefSeq) serine incorporator 3	--
gene_Bol043346	gene_Bol043346	--	0.518044	0.385003	0.28061	67.6747	99.834	106.479	99.9593	201.186	134.367	7.47287	up	1.08131	up	K01166|5.3e-135|bna:106394500|K01166 ribonuclease T2 [EC:4.6.1.19] | (RefSeq) ribonuclease 3	--
gene_Bol043357	gene_Bol043357	--	14.753	9.72417	8.75473	47.7085	22.2826	33.6333	62.2408	36.8965	77.8434	1.34487	up	1.2731	up	K16280|9.1e-254|boe:106312856|K16280 E3 ubiquitin-protein ligase RGLG [EC:2.3.2.27] | (RefSeq) E3 ubiquitin-protein ligase RGLG2-like	--
gene_Bol043380	gene_Bol043380	--	4.26417	9.31664	4.14647	18.5246	18.9112	28.3862	24.2882	47.5124	102.482	1.58265	up	1.98386	up	--	--
gene_Bol043425	gene_Bol043425	--	16.6271	19.2474	14.1633	44.4142	41.8717	39.1586	60.9073	53.4474	52.5028	1.02866	up	0.831147	up	K17804|1.3e-06|dct:110111182|K17804 mitochondrial import inner membrane translocase subunit TIM44 | (RefSeq) mitochondrial import inner membrane translocase subunit TIM44-2	--
gene_Bol043481	gene_Bol043481	LOC106316990	2.72951	5.60623	3.30369	10.1932	9.28311	9.89628	23.5728	17.05	45.9646	0.998995	up	2.10045	up	--	--
gene_Bol043503	gene_Bol043503	LOC106318223	6.30235	7.20414	8.80357	48.8173	34.3332	18.7001	196.196	83.3127	627.362	1.88712	up	3.78531	up	--	--
gene_Bol043644	gene_Bol043644	LOC106435332	0.943505	1.05973	0.85987	2.47944	2.58413	1.5553	4.16424	1.88893	4.46566	0.908148	up	1.14391	up	K13260|3.0e-117|zju:107424876|K13260 isoflavone/4'-methoxyisoflavone 2'-hydroxylase [EC:1.14.14.90 1.14.14.89] | (RefSeq) cytochrome P450 81E8-like	Isoflavonoid biosynthesis (ko00943)
gene_Bol043714	gene_Bol043714	LOC103846850	11.2921	9.58337	6.42461	39.6946	37.1682	38.2847	72.8644	40.3901	33.8719	1.77203	up	0.723339	up	--	--
gene_Bol043768	gene_Bol043768	LOC106314010	0.553863	0.68113	0.868892	4.78138	5.05318	5.626	21.0022	4.55151	16.2182	2.55668	up	1.89961	up	K11968|0.0e+00|boe:106314010|K11968 ariadne-1 [EC:2.3.2.31] | (RefSeq) probable E3 ubiquitin-protein ligase ARI16	--
gene_Bol043772	gene_Bol043772	LOC106318230	6.5238	4.8724	4.61508	12.8133	9.63641	7.18931	11.2564	15.1416	8.80265	0.598293	up	0.62726	up	K18081|1.2e-09|bna:106425271|K18081 myotubularin-related protein 1/2 [EC:3.1.3.64 3.1.3.95] | (RefSeq) phosphatidylinositol-3-phosphatase myotubularin-2-like	Inositol phosphate metabolism (ko00562);; Phosphatidylinositol signaling system (ko04070)
gene_Bol043821	gene_Bol043821	--	0.77037	0.975405	0.841208	3.8639	2.18633	1.92014	8.79212	4.56838	6.68873	1.31201	up	1.76654	up	K06877|6.8e-290|sita:101782769|K06877 DEAD/DEAH box helicase domain-containing protein | (RefSeq) uncharacterized protein LOC101782769 isoform X1	--
gene_Bol043837	gene_Bol043837	LOC106316935	0.636419	0.388451	0.425963	2.08844	3.43339	1.38208	2.46495	5.72201	9.64312	1.91561	up	1.9014	up	--	--
gene_Bol043839	gene_Bol043839	LOC106446102	7.07808	5.02468	6.3412	13.9022	11.6604	12.1994	11.9187	17.9683	20.3938	0.736851	up	0.887062	up	--	--
gene_Bol043918	gene_Bol043918	--	0	0.014869	0.033274	19.8703	13.4176	10.7541	50.4929	11.9833	47.0475	9.54717	up	1.80479	up	K22133|2.9e-64|egr:104443802|K22133 oxalate---CoA ligase [EC:6.2.1.8] | (RefSeq) oxalate--CoA ligase	Glyoxylate and dicarboxylate metabolism (ko00630)
gene_Bol043977	gene_Bol043977	LOC106432229	3.05289	2.97466	2.15757	12.1877	9.26861	9.34202	15.7232	13.0759	15.2662	1.613	up	0.956783	up	K18460|0.0e+00|bna:106432229|K18460 exportin-7 | (RefSeq) exportin-7-like isoform X1	--
gene_Bol044004	gene_Bol044004	--	0.482726	0.566232	1.03699	24.1633	26.4182	17.7064	30.4311	32.9248	52.8708	4.71661	up	1.26525	up	K13493|1.0e-254|bna:106432180|K13493 cytokinin-N-glucosyltransferase [EC:2.4.1.-] | (RefSeq) UDP-glycosyltransferase 76C2	Zeatin biosynthesis (ko00908)
gene_Bol044005	gene_Bol044005	--	0.280399	0.236279	0.326464	6.87742	5.57314	3.30198	16.9968	8.73527	27.9523	3.91202	up	2.30495	up	K09338|1.2e-120|brp:103838097|K09338 homeobox-leucine zipper protein | (RefSeq) LOW QUALITY PROTEIN: homeobox-leucine zipper protein HAT7	--
gene_Bol044016	gene_Bol044016	LOC106390206	12.2489	7.51553	7.40385	77.4514	99.3672	36.1188	94.3221	131.663	213.164	2.69232	up	1.55474	up	K01657|0.0e+00|bna:106390206|K01657 anthranilate synthase component I [EC:4.1.3.27] | (RefSeq) anthranilate synthase alpha subunit 1, chloroplastic-like	Phenylalanine, tyrosine and tryptophan biosynthesis (ko00400);; Biosynthesis of amino acids (ko01230)
gene_Bol044039	gene_Bol044039	--	1.4792	0.99049	0.621428	3.11625	3.12367	3.61977	4.65529	3.72689	3.47491	1.3617	up	0.673015	up	--	--
gene_Bol044245	gene_Bol044245	LOC106337623	35.2121	60.1909	62.2673	230.594	141.552	72.3971	143.383	292.404	335.008	1.18933	up	1.28288	up	K24028|4.0e-63|egu:105043284|K24028 salicylic acid 3-hydroxylase [EC:1.14.11.-] | (RefSeq) LOW QUALITY PROTEIN: protein DOWNY MILDEW RESISTANCE 6-like	--
gene_Bol044297	gene_Bol044297	--	3.49515	2.95112	2.81911	8.29821	7.31729	5.95462	7.36309	10.1457	11.6442	0.9164	up	0.895171	up	--	--
gene_Bol044345	gene_Bol044345	LOC106433981	1.67352	1.00499	1.46902	13.3731	9.54491	5.59987	23.8116	12.1832	42.9129	2.48604	up	2.01962	up	K07195|6.7e-310|bna:106433981|K07195 exocyst complex component 7 | (RefSeq) exocyst complex component EXO70H1-like isoform X2	--
gene_Bol044411	gene_Bol044411	--	4.82989	2.89418	4.33574	8.3011	7.99003	9.79524	9.84723	9.93525	10.7223	0.807272	up	0.662718	up	--	--
gene_Bol044480	gene_Bol044480	--	41.2013	46.1435	73.2653	311.991	287.043	275.447	324.259	381.211	536.702	2.13558	up	0.995561	up	K01647|1.3e-290|bna:106368301|K01647 citrate synthase [EC:2.3.3.1] | (RefSeq) citrate synthase 2, peroxisomal	Citrate cycle (TCA cycle) (ko00020);; Glyoxylate and dicarboxylate metabolism (ko00630);; Carbon metabolism (ko01200);; 2-Oxocarboxylic acid metabolism (ko01210);; Biosynthesis of amino acids (ko01230)
gene_Bol044520	gene_Bol044520	LOC111208669	5.12839	6.86948	6.34605	46.4309	45.6464	45.8266	91.9174	60.058	38.5271	2.60237	up	0.818603	up	K10663|4.9e-11|mdm:103406751|K10663 E3 ubiquitin-protein ligase ATL4 [EC:2.3.2.27] | (RefSeq) E3 ubiquitin-protein ligase ATL4	--
gene_Bol044538	gene_Bol044538	LOC103841925	11.9096	17.5824	13.7084	35.7687	31.3339	46.8204	57.4677	51.0485	34.8594	1.09111	up	0.711182	up	K02732|5.5e-124|bna:106415873|K02732 20S proteasome subunit beta 6 [EC:3.4.25.1] | (RefSeq) proteasome subunit beta type-1	Proteasome (ko03050)
gene_Bol044572	gene_Bol044572	LOC106411946	4.938	4.33114	5.46801	18.4593	18.787	14.3803	55.591	40.6658	47.3118	1.5089	up	1.9025	up	K08900|9.4e-161|lja:Lj3g3v2478860.1|K08900 mitochondrial chaperone BCS1 | (RefSeq) Lj3g3v2478860.1; -	--
gene_Bol044578	gene_Bol044578	LOC106307911	7.20216	5.82449	5.97736	14.4139	16.2193	18.8891	22.5628	20.1753	18.1342	1.08522	up	0.707183	up	K08269|0.0e+00|boe:106307911|K08269 serine/threonine-protein kinase ULK2 [EC:2.7.11.1] | (RefSeq) serine/threonine-protein kinase ATG1	Autophagy - other (ko04136)
gene_Bol044612	gene_Bol044612	LOC106311480	33.4808	37.8419	39.48	74.8868	66.1883	66.0335	91.9534	84.2081	65.444	0.599824	up	0.615905	up	K22991|2.2e-238|boe:106311480|K22991 WD repeat-containing protein 45 | (RefSeq) autophagy-related protein 18a-like	--
gene_Bol044646	gene_Bol044646	--	0.275676	0.199706	0	25.0645	26.5118	27.0905	50.5942	72.7061	83.2187	7.04815	up	1.86319	up	K01369|8.9e-276|bna:106401744|K01369 legumain [EC:3.4.22.34] | (RefSeq) vacuolar-processing enzyme alpha-isozyme isoform X1	--
gene_Bol044698	gene_Bol044698	LOC106312312	64.7019	44.1228	49.165	176.976	161.691	148.295	301.585	205.581	335.405	1.33221	up	1.26121	up	K01773|1.5e-137|pop:7480951|K01773 aldoxime dehydratase [EC:4.99.1.-] | (RefSeq) cytochrome P450 71B36	--
gene_Bol044705	gene_Bol044705	LOC106310578	3.72629	0.555212	1.58513	29.6808	42.2417	10.0731	71.4247	48.0423	187.648	3.54267	up	2.48205	up	K22314|6.1e-140|boe:106310578|K22314 glucosinolate gamma-glutamyl hydrolase [EC:3.4.19.16] | (RefSeq) putative glutamine amidotransferase-like protein C13C5.04	--
gene_Bol044765	gene_Bol044765	LOC106414284	0	0	0	12.4846	7.80416	6.30435	23.1678	21.1149	23.6999	10.7864	up	1.79506	up	K18789|1.8e-278|bna:106414284|K18789 xylogalacturonan beta-1,3-xylosyltransferase [EC:2.4.2.41] | (RefSeq) probable glycosyltransferase At3g42180	--
gene_Bol044774	gene_Bol044774	--	2.25501	0.451991	0.766432	6.02661	4.64522	3.82999	13.8529	7.58322	6.27847	1.71262	up	1.30204	up	--	--
gene_Bol044803	gene_Bol044803	--	2.3038	1.36326	1.77189	29.726	29.1368	17.7263	33.085	29.5027	38.3356	3.51999	up	0.853102	up	K08900|2.5e-12|hbr:110659366|K08900 mitochondrial chaperone BCS1 | (RefSeq) AAA-ATPase At3g50940-like isoform X1	--
gene_Bol044848	gene_Bol044848	LOC106310522	0	0.111363	0.084216	17.4218	13.7825	7.06253	60.5549	38.9402	159.59	7.1288	up	3.34851	up	K13424|6.1e-17|lja:Lj0g3v0288169.1|K13424 WRKY transcription factor 33 | (RefSeq) Lj0g3v0288169.1; -	MAPK signaling pathway - plant (ko04016);; Plant-pathogen interaction (ko04626)
gene_Bol045149	gene_Bol045149	LOC106296333	0.938892	0.401216	0.39682	49.2436	38.7846	33.0597	47.02	66.7113	134.524	5.79986	up	1.58627	up	K07198|3.8e-185|bna:106353818|K07198 5'-AMP-activated protein kinase, catalytic alpha subunit [EC:2.7.11.11] | (RefSeq) CBL-interacting serine/threonine-protein kinase 17-like	--
gene_Bol045150	gene_Bol045150	LOC106298619	0.769095	1.08372	1.2627	6.80645	7.63605	4.25931	11.5071	10.4879	45.7505	2.28454	up	2.47451	up	K07198|1.5e-231|bna:106404674|K07198 5'-AMP-activated protein kinase, catalytic alpha subunit [EC:2.7.11.11] | (RefSeq) CBL-interacting serine/threonine-protein kinase 17-like	--
gene_Bol045207	gene_Bol045207	LOC106296625	51.3671	49.9725	65.3659	222.558	227.182	277.59	338.145	305.139	342.953	1.81975	up	0.880924	up	K03143|2.0e-43|egu:105041337|K03143 transcription initiation factor TFIIH subunit 3 | (RefSeq) RNA polymerase II transcription factor B subunit 4	Basal transcription factors (ko03022);; Nucleotide excision repair (ko03420)
gene_Bol045448	gene_Bol045448	--	14.079	19.1269	22.3546	130.191	129.93	141.798	186.923	175.724	146.65	2.54595	up	0.745687	up	--	--
gene_Bol045599	gene_Bol045599	LOC106307383	4.85308	5.50308	5.93504	483.62	356.581	360.572	1968.41	1434.71	4119.22	5.89862	up	3.20429	up	K01188|3.7e-280|boe:106307383|K01188 beta-glucosidase [EC:3.2.1.21] | (RefSeq) beta-glucosidase 16 isoform X1	Cyanoamino acid metabolism (ko00460);; Starch and sucrose metabolism (ko00500);; Phenylpropanoid biosynthesis (ko00940)
gene_Bol045600	gene_Bol045600	LOC106307874	17.9634	72.3861	81.0886	2605.59	2702.72	1952.6	3760.54	4094.39	4639.72	5.08699	up	1.23405	up	K01188|0.0e+00|bna:106412194|K01188 beta-glucosidase [EC:3.2.1.21] | (RefSeq) beta-glucosidase 30	Cyanoamino acid metabolism (ko00460);; Starch and sucrose metabolism (ko00500);; Phenylpropanoid biosynthesis (ko00940)
gene_Bol045647	gene_Bol045647	LOC106412399	1.57896	1.55682	1.34426	52.5504	47.9729	25.1826	165.689	68.7674	177.774	4.5117	up	2.20009	up	--	--
gene_Bol045752	gene_Bol045752	LOC106414155	0.215289	0.120005	0	1.42154	1.43361	0.943279	2.02182	1.75794	2.32446	3.20379	up	1.13529	up	K09527|2.9e-07|pvu:PHAVU_002G034200g|K09527 DnaJ homolog subfamily C member 7 | (RefSeq) hypothetical protein	--
gene_Bol045762	gene_Bol045762	--	2.49468	2.41468	2.6885	6.4169	6.16625	5.10463	8.66074	8.05274	7.3832	0.921706	up	0.857873	up	K09841|1.8e-22|sot:102584670|K09841 xanthoxin dehydrogenase [EC:1.1.1.288] | (RefSeq) xanthoxin dehydrogenase-like	Carotenoid biosynthesis (ko00906)
gene_Bol045781	gene_Bol045781	--	15.9994	14.9287	19.6347	62.6957	68.0428	50.7948	97.6049	67.2767	86.1039	1.545	up	0.902129	up	K12126|8.4e-15|smo:SELMODRAFT_114141|K12126 phytochrome-interacting factor 3 | (RefSeq) PIF3; hypothetical protein	Plant hormone signal transduction (ko04075);; Circadian rhythm - plant (ko04712)
gene_Bol045794	gene_Bol045794	LOC106312466	14.5066	16.4167	15.353	42.4831	38.1737	37.4479	49.394	42.4775	48.6377	1.0513	up	0.689965	up	K05391|0.0e+00|boe:106312466|K05391 cyclic nucleotide gated channel, plant | (RefSeq) probable cyclic nucleotide-gated ion channel 6	Plant-pathogen interaction (ko04626)
gene_Bol045824	gene_Bol045824	LOC106309817	0	0.223257	0	1.55127	1.05821	1.31816	5.90903	2.34951	17.2923	3.74022	up	3.3257	up	K18195|0.0e+00|boe:106309817|K18195 rhamnogalacturonan endolyase [EC:4.2.2.23] | (RefSeq) probable rhamnogalacturonate lyase B	--
gene_Bol045836	gene_Bol045836	--	0.232816	0.232219	0.138012	0.945388	0.931809	1.00885	1.42237	1.49269	1.45372	1.8497	up	1.00719	up	K11842|5.5e-198|bna:106368669|K11842 ubiquitin carboxyl-terminal hydrolase 12/46 [EC:3.4.19.12] | (RefSeq) ubiquitin carboxyl-terminal hydrolase 4-like	--
gene_Bol045915	gene_Bol045915	--	1.61252	1.84548	1.71371	13.5724	9.51924	8.20223	16.4433	11.9076	57.4525	2.29281	up	2.0763	up	K23544|3.7e-175|brp:103842861|K23544 serine incorporator 1/3 | (RefSeq) serine incorporator 3	--
Brassica_oleracea_newGene_10139	--	--	10.2036	17.4819	16.0438	2.16444	2.48814	2.77127	1.27509	1.08432	0.932313	-2.88329	down	-0.66644	down	--	--
Brassica_oleracea_newGene_10323	--	LOC106387028	17.5234	14.5333	16.534	1.44856	1.00885	2.77566	0.350218	0.456408	0.052254	-3.78632	down	-1.85487	down	K16224|8.0e-40|brp:103829497|K16224 senescence-induced receptor-like serine/threonine-protein kinase | (RefSeq) senescence-induced receptor-like serine/threonine-protein kinase isoform X2	MAPK signaling pathway - plant (ko04016);; Plant-pathogen interaction (ko04626)
Brassica_oleracea_newGene_11725	--	LOC106386833	13.339	15.5135	10.9695	5.11157	6.84304	11.8307	1.73384	3.56213	1.17252	-1.26422	down	-1.03969	down	K16224|1.1e-175|boe:106304564|K16224 senescence-induced receptor-like serine/threonine-protein kinase | (RefSeq) senescence-induced receptor-like serine/threonine-protein kinase	MAPK signaling pathway - plant (ko04016);; Plant-pathogen interaction (ko04626)
Brassica_oleracea_newGene_11980	--	LOC106331780	35.5482	119.516	65.3886	15.3765	20.7695	18.7015	3.63773	2.60415	0.199995	-2.31388	down	-2.84314	down	K01183|1.9e-161|boe:106331780|K01183 chitinase [EC:3.2.1.14] | (RefSeq) basic endochitinase CHB4-like	Amino sugar and nucleotide sugar metabolism (ko00520)
Brassica_oleracea_newGene_1440	--	--	3.15784	4.96793	3.63614	2.66615	2.20833	2.20757	0	0.547626	0.251863	-1.03044	down	-2.6973	down	--	--
Brassica_oleracea_newGene_161	--	LOC104743969	33.9143	20.119	10.0079	15.4742	16.1623	4.8053	0.847333	1.97508	0.956131	-1.07883	down	-2.87942	down	K23280|3.2e-06|sly:101257103|K23280 rhamnogalacturonan I rhamnosyltransferase [EC:2.4.1.351] | (RefSeq) uncharacterized protein LOC101257103 isoform X1	--
Brassica_oleracea_newGene_1705	--	--	4.44593	4.75132	2.96935	1.38515	2.69604	2.68324	0.46359	0.950213	0.287427	-1.01777	down	-1.66946	down	--	--
Brassica_oleracea_newGene_3122	--	--	4.82027	4.6508	3.03098	5.12676	2.46364	4.77541	2.39509	0.670761	0.496335	-0.759639	down	-1.21438	down	--	--
Brassica_oleracea_newGene_3854	--	LOC103870027	108.076	239.144	262.218	11.382	12.9955	23.384	1.73388	1.54973	0.45113	-4.02065	down	-3.22067	down	K11517|1.3e-205|bna:106423516|K11517 (S)-2-hydroxy-acid oxidase [EC:1.1.3.15] | (RefSeq) peroxisomal (S)-2-hydroxy-acid oxidase GLO1-like isoform X1	Glyoxylate and dicarboxylate metabolism (ko00630);; Carbon metabolism (ko01200);; Peroxisome (ko04146)
Brassica_oleracea_newGene_4152	--	--	16.2162	21.1682	13.5843	6.00241	4.9577	14.6597	2.96145	1.41503	0.170896	-1.311	down	-2.20287	down	--	--
Brassica_oleracea_newGene_4846	--	--	35.5696	44.7361	41.5917	15.9074	11.4757	17.0164	3.55672	3.14407	0.655771	-1.76318	down	-2.27956	down	K10355|6.2e-43|bna:106417394|K10355 actin, other eukaryote | (RefSeq) actin-4-like	--
Brassica_oleracea_newGene_521	--	--	11.0477	12.6445	5.80587	7.72496	6.62437	9.32763	0.308934	1.39532	1.90033	-0.638642	down	-2.13143	down	--	--
Brassica_oleracea_newGene_5512	--	LOC111204644	17.3565	15.3165	12.8574	8.43358	5.84737	8.25333	3.51773	3.45723	1.11483	-1.31275	down	-1.15257	down	K02350|4.4e-42|dzi:111277301|K02350 DNA polymerase zeta [EC:2.7.7.7] | (RefSeq) LOW QUALITY PROTEIN: DNA polymerase zeta catalytic subunit	--
Brassica_oleracea_newGene_7040	--	--	324.542	250.104	254.486	8.15991	3.70213	8.1353	1.56697	2.27035	0.596055	-5.67518	down	-1.83654	down	--	--
Brassica_oleracea_newGene_7180	--	LOC106306970	14.9515	9.13335	9.75117	1.23862	1.50031	1.56578	0.889539	0.532924	0.523017	-3.08404	down	-0.798351	down	K09286|5.5e-96|boe:106306970|K09286 EREBP-like factor | (RefSeq) ethylene-responsive transcription factor RAP2-10-like isoform X1	--
Brassica_oleracea_newGene_7229	--	LOC117129306	1.82778	2.94644	2.06751	0.587432	0.948563	0.389634	0.134351	0.265594	0.061373	-2.10343	down	-1.72777	down	K07198|2.1e-06|gmx:106797290|K07198 5'-AMP-activated protein kinase, catalytic alpha subunit [EC:2.7.11.11] | (RefSeq) probable serine/threonine-protein kinase MARK-A	--
Brassica_oleracea_newGene_751	--	--	17.7177	10.028	10.2592	11.483	8.75307	6.67417	3.33201	4.85003	2.98139	-0.780956	down	-0.880066	down	--	--
Brassica_oleracea_newGene_8028	--	--	2.83293	3.52399	4.20854	1.69435	1.05184	1.58115	0.610665	0.585941	0.130705	-1.46308	down	-1.45723	down	--	--
Brassica_oleracea_newGene_8350	--	LOC106311478	25.883	19.8795	16.3349	2.57317	3.73465	5.64592	1.15585	1.81292	0.060867	-2.63036	down	-1.76927	down	K01188|1.9e-250|boe:106311478|K01188 beta-glucosidase [EC:3.2.1.21] | (RefSeq) beta-glucosidase 10-like	Cyanoamino acid metabolism (ko00460);; Starch and sucrose metabolism (ko00500);; Phenylpropanoid biosynthesis (ko00940)
Brassica_oleracea_newGene_8598	--	--	32.8111	8.02545	3.79687	2.79858	2.41652	3.49359	0.750777	0.596932	0	-2.61533	down	-2.44962	down	K01583|0.0e+00|bna:106434712|K01583 arginine decarboxylase [EC:4.1.1.19] | (RefSeq) arginine decarboxylase 2-like	Arginine and proline metabolism (ko00330)
Brassica_oleracea_newGene_8700	--	--	18.024	14.3981	10.2606	2.47478	1.91262	2.38357	0.062068	0.567984	0	-2.94459	down	-3.06594	down	--	--
Brassica_oleracea_newGene_8706	--	--	2.04366	2.86702	1.221	0.999142	0.72703	1.00923	0.112898	0.198319	0	-1.45584	down	-2.77789	down	K17545|1.1e-42|zma:103634684|K17545 serine/threonine-protein kinase ULK4 [EC:2.7.11.1] | (RefSeq) uncharacterized protein LOC103634684	--
Brassica_oleracea_newGene_9022	--	LOC106430383	4.33162	8.46119	4.03007	1.12353	1.10836	0.645828	0.553434	0.345835	0.142554	-2.84521	down	-1.08794	down	--	--
Brassica_oleracea_newGene_9828	--	--	26.3303	37.7723	23.8496	7.71602	7.89767	8.04954	2.72034	3.83932	3.21843	-2.09515	down	-0.955331	down	--	--
gene_Bol004441	gene_Bol004441	LOC106337548	49.2661	69.3935	66.0231	6.00127	4.07943	5.23894	1.62709	1.18274	1.93304	-3.89773	down	-1.21999	down	K15015|3.1e-20|aip:107609646|K15015 solute carrier family 32 (vesicular inhibitory amino acid transporter) | (RefSeq) uncharacterized protein LOC107609646 isoform X1	--
gene_Bol004602	gene_Bol004602	LOC103868164	32.6068	38.567	20.8685	2.81485	4.10707	3.69713	0.345484	0.536216	0.839072	-3.39964	down	-2.11733	down	K02115|1.6e-150|bna:106366891|K02115 F-type H+-transporting ATPase subunit gamma | (RefSeq) ATP synthase gamma chain 1, chloroplastic	Oxidative phosphorylation (ko00190);; Photosynthesis (ko00195)
gene_Bol004667	gene_Bol004667	--	44.6433	37.6555	39.7177	32.7803	31.9177	35.0433	11.1146	21.9002	5.3013	-0.588266	down	-1.07028	down	K14494|4.7e-205|bna:106389181|K14494 DELLA protein | (RefSeq) DELLA protein RGA1	Plant hormone signal transduction (ko04075)
gene_Bol004681	gene_Bol004681	--	10.2399	7.08156	8.35785	1.75741	1.53291	1.58588	0.398238	0.499789	0.722778	-2.68459	down	-1.09467	down	K00924|3.6e-254|han:110910940|K00924 kinase [EC:2.7.1.-] | (RefSeq) receptor protein kinase TMK1-like	--
gene_Bol004709	gene_Bol004709	LOC106343981	37.3717	36.4219	39.5466	14.5	15.9029	17.73	5.41829	6.52623	1.39678	-1.5341	down	-1.53687	down	--	--
gene_Bol004725	gene_Bol004725	BNAC05G31680D	57.334	60.6518	78.063	3.50285	8.15245	16.7578	1.55845	5.00376	0.56153	-3.09779	down	-1.7113	down	K11838|5.1e-11|ppp:112292428|K11838 ubiquitin carboxyl-terminal hydrolase 7 [EC:3.4.19.12] | (RefSeq) ubiquitin carboxyl-terminal hydrolase 13-like	--
gene_Bol004765	gene_Bol004765	--	8.30359	8.97949	6.29698	7.82783	4.84931	6.2727	1.46368	2.06835	0.420339	-0.614893	down	-1.94	down	K10752|3.1e-221|boe:106301566|K10752 histone-binding protein RBBP4 | (RefSeq) WD-40 repeat-containing protein MSI2-like	--
gene_Bol004832	gene_Bol004832	LOC106336889	38.7156	28.3909	11.8716	3.03087	3.81882	1.7442	0.32219	0.576392	0.386624	-3.45733	down	-2.31084	down	K04374|3.4e-68|mus:103997104|K04374 cyclic AMP-dependent transcription factor ATF-4 | (RefSeq) basic leucine zipper 61-like	Protein processing in endoplasmic reticulum (ko04141)
gene_Bol004859	gene_Bol004859	LOC106339461	10.0289	3.11721	1.96748	1.1429	2.08704	3.36748	0.570213	0.194965	0	-1.46215	down	-2.78312	down	--	--
gene_Bol004898	gene_Bol004898	--	33.0893	36.4595	29.5286	31.0347	18.0327	22.289	8.48584	11.7892	11.2077	-0.774982	down	-0.732921	down	K12134|9.5e-277|boe:106342972|K12134 circadian clock associated 1 | (RefSeq) protein CCA1 isoform X1	Circadian rhythm - plant (ko04712)
gene_Bol004899	gene_Bol004899	LOC106341947	102.67	212.949	244.757	17.7028	20.4741	33.6331	9.06221	7.20433	0.928282	-3.28275	down	-1.79384	down	K01092|1.7e-09|boe:106307850|K01092 myo-inositol-1(or 4)-monophosphatase [EC:3.1.3.25] | (RefSeq) phosphatase IMPL1, chloroplastic-like isoform X1	Inositol phosphate metabolism (ko00562);; Phosphatidylinositol signaling system (ko04070)
gene_Bol004910	gene_Bol004910	--	13.5269	9.60034	10.9354	2.88235	2.63453	3.13544	0.507227	0.552284	0.046892	-2.27065	down	-2.65022	down	K20642|8.6e-100|aip:107645583|K20642 Rho GTPase-activating protein 22/24/25 | (RefSeq) rho GTPase-activating protein 2	--
gene_Bol005030	gene_Bol005030	--	18.9034	30.4028	25.4281	4.89681	3.9528	8.10232	1.62774	2.54808	1.48589	-2.45047	down	-1.18689	down	K11294|1.1e-160|bna:106410945|K11294 nucleolin | (RefSeq) RNA-binding protein CP33, chloroplastic	--
gene_Bol005074	gene_Bol005074	--	11.8922	13	6.13076	1.54165	1.23591	2.14783	0.326073	0.26691	0.194224	-2.95027	down	-2.22085	down	K15333|1.6e-93|nsy:104224633|K15333 tRNA guanosine-2'-O-methyltransferase [EC:2.1.1.34] | (RefSeq) uncharacterized protein LOC104224633	--
gene_Bol005157	gene_Bol005157	--	12.2283	9.04988	2.73531	1.99749	1.80706	1.68053	0.060418	0.342264	0	-2.38807	down	-3.37403	down	K17479|3.5e-192|bna:106391649|K17479 glutaredoxin domain-containing cysteine-rich protein 1 | (RefSeq) uncharacterized protein At5g39865-like isoform X1	--
gene_Bol005249	gene_Bol005249	--	55.1666	101.999	82.6897	5.6153	6.03649	7.28227	1.73319	2.15597	0.969983	-3.96841	down	-1.57842	down	K08912|1.7e-136|bna:106357831|K08912 light-harvesting complex II chlorophyll a/b binding protein 1 | (RefSeq) chlorophyll a-b binding protein 1, chloroplastic-like	Photosynthesis - antenna proteins (ko00196)
gene_Bol005250	gene_Bol005250	LOC106305804	133.628	269.917	211.782	16.5961	17.13	15.5332	4.36772	4.78734	2.00019	-3.9483	down	-1.78842	down	K08912|2.0e-152|boe:106305804|K08912 light-harvesting complex II chlorophyll a/b binding protein 1 | (RefSeq) chlorophyll a-b binding protein 1, chloroplastic-like	Photosynthesis - antenna proteins (ko00196)
gene_Bol005254	gene_Bol005254	LOC106421819	24.5616	31.2774	28.0172	14.9298	14.8185	17.2607	6.44823	11.5386	3.47365	-1.13814	down	-0.805266	down	K01880|0.0e+00|bna:106421819|K01880 glycyl-tRNA synthetase [EC:6.1.1.14] | (RefSeq) glycine--tRNA ligase, mitochondrial 1-like	Aminoacyl-tRNA biosynthesis (ko00970)
gene_Bol005418	gene_Bol005418	--	89.859	64.8292	61.6511	18.6051	20.8971	19.6601	8.15045	12.7132	4.00844	-2.15923	down	-0.924003	down	K12827|9.9e-07|cic:CICLE_v10004777mg|K12827 splicing factor 3A subunit 3 | (RefSeq) hypothetical protein	Spliceosome (ko03040)
gene_Bol005766	gene_Bol005766	LOC106343115	20.6188	21.4135	28.245	12.5483	14.0038	14.7919	3.64012	7.44841	2.14678	-1.06938	down	-1.3159	down	K00128|0.0e+00|boe:106343115|K00128 aldehyde dehydrogenase (NAD+) [EC:1.2.1.3] | (RefSeq) aldehyde dehydrogenase family 2 member B7, mitochondrial	Glycolysis / Gluconeogenesis (ko00010);; Ascorbate and aldarate metabolism (ko00053);; Fatty acid degradation (ko00071);; Valine, leucine and isoleucine degradation (ko00280);; Lysine degradation (ko00310);; Arginine and proline metabolism (ko00330);; Histidine metabolism (ko00340);; Tryptophan metabolism (ko00380);; beta-Alanine metabolism (ko00410);; Glycerolipid metabolism (ko00561);; Pyruvate…
gene_Bol005804	gene_Bol005804	--	25.6966	20.7491	20.1	2.14475	2.85121	3.25296	0.612596	1.1989	0.616606	-3.30275	down	-1.37549	down	--	--
gene_Bol005860	gene_Bol005860	--	16.5216	14.2377	15.1197	8.5931	8.26824	11.2538	3.98222	5.20606	2.67503	-1.0056	down	-0.872495	down	K14491|5.1e-21|sot:102587717|K14491 two-component response regulator ARR-B family | (RefSeq) two-component response regulator ORR24-like	Plant hormone signal transduction (ko04075)
gene_Bol006069	gene_Bol006069	LOC106313792	35.3142	80.0577	62.2323	14.3227	19.3216	25.7462	6.48115	3.79691	0.202737	-1.89175	down	-2.25916	down	--	--
gene_Bol006085	gene_Bol006085	--	1187.64	1845.44	1255.48	408.639	422.298	613.963	195.011	188.87	32.3036	-1.87571	down	-1.52376	down	K02692|1.6e-109|boe:106319036|K02692 photosystem I subunit II | (RefSeq) photosystem I reaction center subunit II-1, chloroplastic	Photosynthesis (ko00195)
gene_Bol006115	gene_Bol006115	LOC106435143	82.4592	57.3101	36.9931	7.83266	13.1482	12.2707	0.038306	1.7161	0	-2.68874	down	-4.00763	down	K08235|7.1e-172|bna:106435143|K08235 xyloglucan:xyloglucosyl transferase [EC:2.4.1.207] | (RefSeq) xyloglucan endotransglucosylase/hydrolase protein 9	--
gene_Bol006123	gene_Bol006123	LOC106315451	478.424	904.326	960.852	135.413	127.659	161.224	55.8469	49.1134	11.3445	-2.77995	down	-1.58103	down	K02636|4.4e-132|bna:106392303|K02636 cytochrome b6-f complex iron-sulfur subunit [EC:7.1.1.6] | (RefSeq) cytochrome b6-f complex iron-sulfur subunit, chloroplastic-like	Photosynthesis (ko00195)
gene_Bol006327	gene_Bol006327	LOC106306576	337.796	466.15	494.242	59.7163	56.8869	84.3244	6.22676	9.84163	1.61727	-3.003	down	-3.21906	down	K15283|9.2e-226|boe:106306576|K15283 solute carrier family 35, member E1 | (RefSeq) triose phosphate/phosphate translocator, chloroplastic isoform X1	--
gene_Bol006332	gene_Bol006332	LOC106303857	16.1655	16.255	14.0514	10.0655	11.5851	10.6935	1.51466	4.92743	1.86386	-0.815111	down	-1.57637	down	K02874|1.3e-91|boe:106303857|K02874 large subunit ribosomal protein L14 | (RefSeq) 50S ribosomal protein HLP, mitochondrial isoform X1	Ribosome (ko03010)
gene_Bol006352	gene_Bol006352	--	122.457	105.909	78.6896	74.9655	85.0481	53.7739	19.2348	45.5584	12.0265	-0.807335	down	-1.16132	down	K15631|4.9e-22|ath:AT1G16540|K15631 molybdenum cofactor sulfurtransferase [EC:2.8.1.9] | (RefSeq) ABA3; molybdenum cofactor sulfurase (LOS5) (ABA3)	Folate biosynthesis (ko00790)
gene_Bol006378	gene_Bol006378	LOC106306884	68.9305	114.475	50.4719	5.94865	2.91836	11.5194	0	0	0	-3.83274	down	-9.72766	down	--	--
gene_Bol006380	gene_Bol006380	LOC106306884	60.1202	105.106	46.0035	7.14411	2.79744	12.0809	0.038237	0.634223	0.421843	-3.57357	down	-3.78226	down	--	--
gene_Bol006514	gene_Bol006514	RPS15A	131.259	100.769	106.373	67.9147	71.8681	85.2716	9.01065	12.7288	0.669559	-0.884686	down	-3.07832	down	K02957|1.7e-69|aly:9300731|K02957 small subunit ribosomal protein S15Ae | (RefSeq) 40S ribosomal protein S15a-1	Ribosome (ko03010)
gene_Bol006547	gene_Bol006547	LOC106377037	1294.63	1648.82	1644.58	44.0294	52.1088	82.6778	8.9731	14.8851	2.55744	-4.98985	down	-2.46444	down	K14332|7.1e-80|bna:106377037|K14332 photosystem I subunit PsaO | (RefSeq) photosystem I subunit O	Photosynthesis (ko00195)
gene_Bol006593	gene_Bol006593	LOC106307202	7.1604	5.50063	6.50273	4.40118	3.75733	5.64028	1.65657	2.906	0.986867	-0.772512	down	-0.960492	down	K12126|2.4e-260|bna:106419805|K12126 phytochrome-interacting factor 3 | (RefSeq) transcription factor PIF3	Plant hormone signal transduction (ko04075);; Circadian rhythm - plant (ko04712)
gene_Bol006646	gene_Bol006646	LOC106421948	42.059	24.2233	22.7983	9.59174	8.75582	11.3249	4.29619	5.62704	1.07587	-1.8736	down	-1.13858	down	K14684|1.8e-276|bna:106421948|K14684 solute carrier family 25 (mitochondrial phosphate transporter), member 23/24/25/41 | (RefSeq) calcium-binding mitochondrial carrier protein SCaMC-3-like	--
gene_Bol006676	gene_Bol006676	LOC106357682	72.4494	51.1468	34.3863	1.1722	1.23469	0.807058	0.037408	0.182035	0.193035	-5.88122	down	-2.49116	down	K01051|1.2e-138|zju:107405035|K01051 pectinesterase [EC:3.1.1.11] | (RefSeq) pectinesterase-like	Pentose and glucuronate interconversions (ko00040)
gene_Bol006697	gene_Bol006697	LOC106336797	407.918	575.29	640.667	223.826	205.372	276.723	65.707	76.8462	10.3928	-1.51297	down	-1.94011	down	K02721|5.6e-63|bna:106415703|K02721 photosystem II PsbW protein | (RefSeq) photosystem II reaction center W protein, chloroplastic	Photosynthesis (ko00195)
gene_Bol006707	gene_Bol006707	LOC106339823	94.4858	75.1723	82.5773	55.6794	45.9728	46.1819	20.6364	27.9944	12.2739	-1.06669	down	-0.923321	down	K17292|1.9e-53|boe:106339823|K17292 tubulin-specific chaperone A | (RefSeq) tubulin-folding cofactor A	--
gene_Bol006715	gene_Bol006715	LOC106337208	6.20204	4.95137	5.97463	2.24462	1.34535	2.11934	0.549562	0.466726	0.192244	-1.88459	down	-1.86543	down	--	--
gene_Bol006726	gene_Bol006726	--	66.676	145.383	165.643	6.47302	5.64574	6.24216	2.19044	0.942684	1.11401	-4.67664	down	-1.71625	down	K01623|2.0e-217|boe:106342680|K01623 fructose-bisphosphate aldolase, class I [EC:4.1.2.13] | (RefSeq) probable fructose-bisphosphate aldolase 1, chloroplastic	Glycolysis / Gluconeogenesis (ko00010);; Pentose phosphate pathway (ko00030);; Fructose and mannose metabolism (ko00051);; Carbon fixation in photosynthetic organisms (ko00710);; Carbon metabolism (ko01200);; Biosynthesis of amino acids (ko01230)
gene_Bol006738	gene_Bol006738	--	28.2699	48.2241	53.7602	10.1147	8.5368	17.1234	2.4495	2.63356	2.19819	-2.18362	down	-1.87334	down	K01803|1.5e-172|bna:106420738|K01803 triosephosphate isomerase (TIM) [EC:5.3.1.1] | (RefSeq) triosephosphate isomerase, chloroplastic	Glycolysis / Gluconeogenesis (ko00010);; Fructose and mannose metabolism (ko00051);; Inositol phosphate metabolism (ko00562);; Carbon fixation in photosynthetic organisms (ko00710);; Carbon metabolism (ko01200);; Biosynthesis of amino acids (ko01230)
gene_Bol006808	gene_Bol006808	--	11.0462	10.8661	9.25213	3.18891	3.45894	2.62053	1.14537	1.00806	0.975536	-2.03993	down	-1.13739	down	K00940|1.1e-45|aly:9310729|K00940 nucleoside-diphosphate kinase [EC:2.7.4.6] | (RefSeq) nucleoside diphosphate kinase III, chloroplastic/mitochondrial	Purine metabolism (ko00230);; Pyrimidine metabolism (ko00240);; MAPK signaling pathway - plant (ko04016)
gene_Bol006811	gene_Bol006811	LOC106313289	13.0787	8.89635	13.1369	3.81391	2.469	3.194	0.668613	1.90882	0.62424	-2.18479	down	-1.1985	down	--	--
gene_Bol007131	gene_Bol007131	--	84.1185	62.1394	5.65317	20.168	27.1317	7.84356	6.02243	1.04529	0.293801	-1.71613	down	-2.63475	down	--	--
gene_Bol007166	gene_Bol007166	--	5.01357	7.74915	3.60037	1.91805	3.44733	3.37888	0	0.338552	0	-1.19	down	-4.38402	down	K00679|2.3e-18|cic:CICLE_v10027727mg|K00679 phospholipid:diacylglycerol acyltransferase [EC:2.3.1.158] | (RefSeq) hypothetical protein	Glycerolipid metabolism (ko00561)
gene_Bol007255	gene_Bol007255	--	47.3534	129.765	78.7082	19.5954	22.7783	34.1045	7.88113	10.765	0.311747	-2.05561	down	-1.77396	down	K03386|3.0e-140|bna:106450458|K03386 peroxiredoxin 2/4 [EC:1.11.1.24] | (RefSeq) 2-Cys peroxiredoxin BAS1, chloroplastic	--
gene_Bol007268	gene_Bol007268	LOC106450397	26.1004	20.2795	25.9438	11.2294	16.4922	14.5953	4.57889	5.46135	2.21846	-1.06672	down	-1.4266	down	--	--
gene_Bol007343	gene_Bol007343	LOC106342168	35.5681	29.9429	36.9574	21.7246	24.5007	36.9453	18.3618	12.0654	4.24636	-0.604802	down	-0.954199	down	K14491|1.7e-11|bdi:100821963|K14491 two-component response regulator ARR-B family | (RefSeq) two-component response regulator ORR21	Plant hormone signal transduction (ko04075)
gene_Bol007345	gene_Bol007345	--	190.034	407.903	357.289	10.9576	11.3884	17.2665	1.05611	2.92498	0.194194	-4.90603	down	-2.98528	down	K00927|3.0e-260|bna:111210737|K00927 phosphoglycerate kinase [EC:2.7.2.3] | (RefSeq) phosphoglycerate kinase 1, chloroplastic-like	Glycolysis / Gluconeogenesis (ko00010);; Carbon fixation in photosynthetic organisms (ko00710);; Carbon metabolism (ko01200);; Biosynthesis of amino acids (ko01230)
gene_Bol007428	gene_Bol007428	LOC106305891	3.79932	3.47079	3.42192	2.60537	2.70193	2.52198	1.05842	1.53022	0.232665	-0.739353	down	-1.1813	down	--	--
gene_Bol007639	gene_Bol007639	LOC106343281	16.3881	10.964	10.4712	8.29909	7.62479	6.77007	4.14403	4.78016	1.5259	-1.02637	down	-0.795923	down	K14538|4.0e-312|boe:106343281|K14538 nuclear GTP-binding protein | (RefSeq) guanine nucleotide-binding protein-like NSN1	Ribosome biogenesis in eukaryotes (ko03008)
gene_Bol007656	gene_Bol007656	--	3.44049	2.76467	2.3321	0.882805	0.585366	1.08874	0.241891	0.404351	0.08582	-2.01986	down	-1.42619	down	--	--
gene_Bol007720	gene_Bol007720	LOC106318895	820.091	1396.69	1128.57	115.271	119.332	153.496	32.7757	53.1996	8.08193	-3.41616	down	-1.76847	down	K08916|2.6e-163|bna:106376306|K08916 light-harvesting complex II chlorophyll a/b binding protein 5 | (RefSeq) chlorophyll a-b binding protein CP26, chloroplastic-like	Photosynthesis - antenna proteins (ko00196)
gene_Bol007876	gene_Bol007876	--	45.7733	59.3385	63.2175	12.6775	11.628	12.4893	2.23845	2.09825	0	-2.49627	down	-2.84877	down	--	--
gene_Bol007882	gene_Bol007882	LOC106306736	21.8466	44.5102	28.12	16.3688	16.6775	21.7939	6.48217	6.95789	0.568591	-1.09261	down	-1.71417	down	K02884|4.3e-113|bna:106411397|K02884 large subunit ribosomal protein L19 | (RefSeq) 50S ribosomal protein L19-2, chloroplastic-like	Ribosome (ko03010)
gene_Bol007941	gene_Bol007941	LOC103827610	11.0877	9.54133	5.0749	2.67343	2.46901	3.62162	1.33667	1.01152	0.151563	-1.83301	down	-1.50453	down	--	--
gene_Bol007979	gene_Bol007979	LOC103827745	86.113	76.5905	80.1041	57.5787	60.6623	60.0291	28.2412	31.4188	11.26	-0.74231	down	-1.00285	down	K02898|2.9e-73|bna:106390881|K02898 large subunit ribosomal protein L26e | (RefSeq) 60S ribosomal protein L26-1	Ribosome (ko03010)
gene_Bol008089	gene_Bol008089	LOC106431199	22.6491	47.3944	60.4368	2.60437	2.47615	9.25934	0.245842	1.55239	0.53955	-3.51538	down	-2.20542	down	--	--
gene_Bol008192	gene_Bol008192	--	17.9677	9.93115	6.03927	3.23583	5.78076	6.17867	0.621989	0.712166	0.090794	-1.43051	down	-3.03807	down	--	--
gene_Bol008194	gene_Bol008194	--	7.12117	13.9356	10.0167	4.37693	3.24377	6.3353	1.41335	1.43334	0.654285	-1.46864	down	-1.63384	down	--	--
gene_Bol008218	gene_Bol008218	--	11.2554	18.2736	11.857	10.3545	8.73191	10.7872	2.65301	3.12304	1.79286	-0.775249	down	-1.59922	down	K09568|1.5e-12|apro:F751_6051|K09568 FK506-binding protein 1 [EC:5.2.1.8] | (RefSeq) FK506-binding protein 1	--
gene_Bol008289	gene_Bol008289	LOC106341739	86.0988	114.226	118.742	45.2616	44.2985	80.3876	15.7021	21.2396	2.35575	-1.22166	down	-1.85102	down	K03798|0.0e+00|boe:106341739|K03798 cell division protease FtsH [EC:3.4.24.-] | (RefSeq) ATP-dependent zinc metalloprotease FTSH 2, chloroplastic	--
gene_Bol008345	gene_Bol008345	LOC106321487	19.5947	10.2366	12.2619	3.4183	5.61323	2.29651	0	0.940887	0.097497	-2.16309	down	-3.05662	down	--	--
gene_Bol008379	gene_Bol008379	LOC106341709	9.12989	12.2697	15.7374	2.56984	2.03197	3.41265	0.57859	1.69546	0.449488	-2.52515	down	-1.21607	down	K12309|1.0e-242|ath:AT3G52840|K12309 beta-galactosidase [EC:3.2.1.23] | (RefSeq) BGAL2; beta-galactosidase 2	Galactose metabolism (ko00052);; Other glycan degradation (ko00511);; Glycosaminoglycan degradation (ko00531);; Sphingolipid metabolism (ko00600);; Glycosphingolipid biosynthesis - ganglio series (ko00604)
gene_Bol008478	gene_Bol008478	LOC106303658	36.2521	42.4894	49.638	34.1324	29.7205	32.0204	21.5859	15.506	8.75604	-0.727234	down	-0.715491	down	--	--
gene_Bol008547	gene_Bol008547	LOC103835251	1144.37	3353.95	2057.04	337.504	254.925	335.197	88.4001	69.9663	13.9862	-3.1349	down	-2.15169	down	K08912|3.1e-153|bna:106361603|K08912 light-harvesting complex II chlorophyll a/b binding protein 1 | (RefSeq) chlorophyll a-b binding protein 1, chloroplastic	Photosynthesis - antenna proteins (ko00196)
gene_Bol008550	gene_Bol008550	LOC106336230	8.78001	6.96599	7.6729	3.47314	3.73641	3.5401	0.808136	1.80337	1.4191	-1.4129	down	-0.969109	down	--	--
gene_Bol008564	gene_Bol008564	--	171.99	209.077	179.866	20.7546	22.2721	33.0337	8.04017	12.0829	1.67991	-3.18708	down	-1.52795	down	K00679|1.8e-47|cic:CICLE_v10027727mg|K00679 phospholipid:diacylglycerol acyltransferase [EC:2.3.1.158] | (RefSeq) hypothetical protein	Glycerolipid metabolism (ko00561)
gene_Bol008609	gene_Bol008609	--	70.6551	117.988	97.515	42.0163	38.9279	54.1043	16.1455	13.3773	1.1087	-1.39236	down	-1.88962	down	K02879|1.2e-112|bna:106353684|K02879 large subunit ribosomal protein L17 | (RefSeq) 50S ribosomal protein L17, chloroplastic-like	Ribosome (ko03010)
gene_Bol008622	gene_Bol008622	--	7.29776	12.1555	10.2712	1.39283	2.10164	1.80053	0.135939	0.210056	0.199568	-2.77675	down	-2.88196	down	K18881|3.6e-222|bna:106410448|K18881 D-lactate dehydratase [EC:4.2.1.130] | (RefSeq) DJ-1 protein homolog F	Pyruvate metabolism (ko00620)
gene_Bol008638	gene_Bol008638	LOC106409467	499.919	694.48	661.953	93.9413	103.832	135.198	11.5014	25.2541	5.0973	-2.78653	down	-2.69153	down	K08907|1.6e-140|bna:106409467|K08907 light-harvesting complex I chlorophyll a/b binding protein 1 | (RefSeq) chlorophyll a-b binding protein 6, chloroplastic isoform X1	Photosynthesis - antenna proteins (ko00196)
gene_Bol008758	gene_Bol008758	LOC106334698	64.2952	69.4397	73.2403	50.7257	51.7244	62.1484	28.7994	36.576	16.4285	-0.633778	down	-0.656616	down	K09264|1.1e-36|tcc:18608962|K09264 MADS-box transcription factor, plant | (RefSeq) agamous-like MADS-box protein AGL27	--
gene_Bol008817	gene_Bol008817	LOC106336081	87.9234	100.636	68.9646	13.4474	17.3437	14.452	6.1718	6.60821	2.66485	-2.79906	down	-1.20956	down	K16221|1.3e-110|boe:106336081|K16221 transcription factor TCP21 (protein CCA1 HIKING EXPEDITION) | (RefSeq) transcription factor TCP21-like	Circadian rhythm - plant (ko04712)
gene_Bol008835	gene_Bol008835	BNAC03G03350D	14.3012	24.048	17.4308	6.33937	7.02409	6.28517	1.83244	2.73023	0.546692	-1.80086	down	-1.61871	down	--	--
gene_Bol008838	gene_Bol008838	--	2.89812	8.13077	6.48177	2.2872	1.81807	1.29783	0.427947	0.561852	0.772615	-2.00394	down	-1.12586	down	K00901|0.0e+00|bna:106384992|K00901 diacylglycerol kinase (ATP) [EC:2.7.1.107] | (RefSeq) diacylglycerol kinase 1-like	Glycerolipid metabolism (ko00561);; Glycerophospholipid metabolism (ko00564);; Phosphatidylinositol signaling system (ko04070)
gene_Bol008913	gene_Bol008913	RPS15A	34.725	22.9888	19.2194	10.724	8.33088	9.25935	2.14545	4.57144	1.43143	-1.72608	down	-1.43716	down	K02957|1.7e-69|aly:9300731|K02957 small subunit ribosomal protein S15Ae | (RefSeq) 40S ribosomal protein S15a-1	Ribosome (ko03010)
gene_Bol009212	gene_Bol009212	LOC106328600	150.1	209.918	187.662	98.554	110.347	129.578	53.0675	64.6539	23.0075	-0.999494	down	-0.939117	down	K02904|2.3e-77|boe:106328600|K02904 large subunit ribosomal protein L29 | (RefSeq) 50S ribosomal protein L29, chloroplastic	Ribosome (ko03010)
gene_Bol009236	gene_Bol009236	LOC106336304	285.853	163.971	150.691	5.35341	6.81212	7.40697	0.804646	2.63721	0.708168	-5.22208	down	-1.89254	down	K23280|5.3e-74|egu:105044899|K23280 rhamnogalacturonan I rhamnosyltransferase [EC:2.4.1.351] | (RefSeq) uncharacterized protein At1g04910-like	--
gene_Bol009269	gene_Bol009269	LOC106411285	9.46135	9.23377	6.94707	4.72663	3.0111	3.15464	1.68692	1.7392	1.23799	-1.53174	down	-0.821678	down	K02906|5.6e-186|bna:106411285|K02906 large subunit ribosomal protein L3 | (RefSeq) 50S ribosomal protein L3-2, chloroplastic-like	Ribosome (ko03010)
gene_Bol009373	gene_Bol009373	LOC106308431	4.25339	3.67565	2.25061	2.03824	1.70578	2.28404	0.923447	0.991076	0.339298	-1.04923	down	-1.0761	down	K10755|3.2e-12|vcn:VOLCADRAFT_56553|K10755 replication factor C subunit 2/4 | (RefSeq) rfc4; DNA replication factor C complex subunit 4	DNA replication (ko03030);; Nucleotide excision repair (ko03420);; Mismatch repair (ko03430)
gene_Bol009374	gene_Bol009374	LOC106313176	78.3832	102.644	88.9439	13.1568	9.25401	24.4303	2.77929	5.37859	1.74788	-2.84116	down	-1.89394	down	K18159|6.5e-10|eus:EUTSA_v10019098mg|K18159 NADH dehydrogenase [ubiquinone] 1 alpha subcomplex assembly factor 1 | (RefSeq) hypothetical protein	--
gene_Bol009386	gene_Bol009386	LOC106431799	58.0813	44.4343	39.6974	20.5429	15.5254	31.23	6.43193	7.81428	7.49777	-1.3799	down	-1.18623	down	K07198|1.6e-50|lsv:111893736|K07198 5'-AMP-activated protein kinase, catalytic alpha subunit [EC:2.7.11.11] | (RefSeq) CBL-interacting protein kinase 5-like isoform X1	--
gene_Bol009389	gene_Bol009389	--	50.31	38.4774	36.7597	1.50504	3.69522	0.578883	0.076728	0.437445	0.030682	-4.7059	down	-3.0686	down	--	--
gene_Bol009411	gene_Bol009411	LOC106375607	44.5953	74.652	58.1812	17.3745	17.9657	24.5581	8.85933	9.14786	2.84438	-1.87492	down	-1.20645	down	K03405|1.7e-235|bna:106375607|K03405 magnesium chelatase subunit I [EC:6.6.1.1] | (RefSeq) magnesium-chelatase subunit ChlI-1, chloroplastic	Porphyrin and chlorophyll metabolism (ko00860)
gene_Bol009419	gene_Bol009419	--	2.57639	2.19395	2.36108	1.95159	1.70475	2.19194	0.793848	1.14192	0.161672	-0.586807	down	-1.19468	down	K01756|5.0e-306|bna:106375604|K01756 adenylosuccinate lyase [EC:4.3.2.2] | (RefSeq) uncharacterized protein LOC106375604	Purine metabolism (ko00230);; Alanine, aspartate and glutamate metabolism (ko00250)
gene_Bol009548	gene_Bol009548	LOC106396806	70.9632	76.0752	80.0208	35.1751	38.4837	48.7128	15.1266	27.6123	16.2184	-1.19539	down	-0.657475	down	--	--
gene_Bol009555	gene_Bol009555	LOC106344896	54.0861	32.3641	37.4725	6.10388	17.764	11.674	2.14669	2.79541	0	-2.07495	down	-2.59315	down	--	--
gene_Bol009631	gene_Bol009631	LOC106351283	4.18188	5.42205	4.40727	2.65809	2.58955	2.2874	0.62129	0.720019	0	-1.18664	down	-2.18933	down	--	--
gene_Bol009708	gene_Bol009708	LOC106294253	10.9981	9.73012	12.9165	9.42287	6.77388	7.47195	2.35606	3.0237	0.895546	-0.81099	down	-1.59321	down	--	--
gene_Bol009709	gene_Bol009709	LOC106294253	5.22186	6.38154	8.08756	3.52405	5.16984	4.19714	1.38177	2.37389	1.02205	-0.912728	down	-1.05197	down	--	--
gene_Bol009832	gene_Bol009832	LOC106311694	30.3122	37.482	38.0347	20.4589	20.1614	15.2624	8.27999	12.0219	2.44157	-1.221	down	-1.00904	down	K23544|1.7e-115|brp:103842861|K23544 serine incorporator 1/3 | (RefSeq) serine incorporator 3	--
gene_Bol009840	gene_Bol009840	--	11.211	11.7683	11.8929	4.48517	3.07363	3.95079	1.54764	1.63123	0.903271	-1.90192	down	-1.12112	down	K23544|1.3e-294|brp:103842861|K23544 serine incorporator 1/3 | (RefSeq) serine incorporator 3	--
gene_Bol009860	gene_Bol009860	LOC106312769	239.94	326.35	200.21	38.4775	34.8611	45.9034	8.15342	14.4751	3.06187	-2.98527	down	-1.90948	down	K08917|8.4e-148|bna:106415490|K08917 light-harvesting complex II chlorophyll a/b binding protein 6 | (RefSeq) chlorophyll a-b binding protein CP24, chloroplastic-like	Photosynthesis - antenna proteins (ko00196)
gene_Bol009919	gene_Bol009919	LOC106382101	4.04194	2.25398	2.30163	1.83156	1.78198	1.67864	0.524505	0.932994	0.629294	-0.987096	down	-0.9278	down	K04077|3.2e-290|bna:106382101|K04077 chaperonin GroEL | (RefSeq) chaperonin 60 subunit beta 3, chloroplastic	RNA degradation (ko03018)
gene_Bol009975	gene_Bol009975	LOC106342379	60.5138	69.4879	68.7427	43.7006	51.0492	60.8213	15.2147	32.906	6.73811	-0.656574	down	-1.20626	down	K01897|0.0e+00|boe:106342379|K01897 long-chain acyl-CoA synthetase [EC:6.2.1.3] | (RefSeq) long-chain-fatty-acid--[acyl-carrier-protein] ligase AEE15, chloroplastic	Fatty acid biosynthesis (ko00061);; Fatty acid degradation (ko00071);; Fatty acid metabolism (ko01212);; Peroxisome (ko04146)
gene_Bol009977	gene_Bol009977	--	32.8838	32.8747	26.9655	9.81852	5.47606	19.0154	1.86139	2.7869	0.15996	-1.7452	down	-2.5762	down	K17285|2.3e-295|boe:106342254|K17285 methanethiol oxidase [EC:1.8.3.4] | (RefSeq) selenium-binding protein 2-like	Sulfur metabolism (ko00920)
gene_Bol010004	gene_Bol010004	LOC106317861	50.9083	84.8546	68.6181	2.36512	3.77983	4.37067	0.353092	0.398888	0.155548	-4.58484	down	-3.17724	down	K00284|0.0e+00|boe:106317861|K00284 glutamate synthase (ferredoxin) [EC:1.4.7.1] | (RefSeq) ferredoxin-dependent glutamate synthase 1, chloroplastic/mitochondrial	Glyoxylate and dicarboxylate metabolism (ko00630);; Nitrogen metabolism (ko00910)
gene_Bol010009	gene_Bol010009	LOC106318781	14.5871	9.57781	9.9905	7.37363	6.43968	8.27642	2.32795	2.85596	0.63881	-0.922005	down	-1.61562	down	K23872|3.3e-115|jcu:105643042|K23872 putative homogalacturonan methyltransferase [EC:2.1.1.-] | (RefSeq) probable methyltransferase PMT13	--
gene_Bol010010	gene_Bol010010	LOC106313257	2.50121	2.66966	2.65027	1.36719	1.25507	2.10177	0.606335	0.703903	0.248384	-1.02501	down	-1.24251	down	--	--
gene_Bol010019	gene_Bol010019	LOC106313111	19.6471	17.2799	8.78903	4.98834	2.78726	6.37713	0.896165	1.19783	0.072322	-1.98593	down	-2.43423	down	K03106|5.5e-298|boe:106313111|K03106 signal recognition particle subunit SRP54 [EC:3.6.5.4] | (RefSeq) signal recognition particle 54 kDa protein, chloroplastic	Protein export (ko03060)
gene_Bol010024	gene_Bol010024	LOC106313118	54.9102	75.981	70.8563	26.3266	26.3277	37.0385	5.89381	15.4722	3.31051	-1.47683	down	-1.55211	down	K00465|3.8e-44|bpg:Bathy14g02290|K00465 carotenoid 9,10(9',10')-cleavage dioxygenase 1 [EC:1.13.11.-] | (RefSeq) hypothetical protein	--
gene_Bol010041	gene_Bol010041	LOC106318630	27.4409	29.4624	29.9821	11.7838	13.9357	12.8297	2.53198	6.41984	1.40333	-1.47115	down	-1.58897	down	K00700|0.0e+00|boe:106318630|K00700 1,4-alpha-glucan branching enzyme [EC:2.4.1.18] | (RefSeq) 1,4-alpha-glucan-branching enzyme 2-2, chloroplastic/amyloplastic isoform X1	Starch and sucrose metabolism (ko00500)
gene_Bol010076	gene_Bol010076	LOC106318840	104.836	83.4121	73.6546	17.5704	20.5253	14.9775	4.09826	6.48539	7.18246	-2.58889	down	-1.11141	down	--	--
gene_Bol010109	gene_Bol010109	LOC106315734	4.66868	2.86654	3.96618	2.04656	1.14518	2.14708	0.430968	0.567951	0	-1.40532	down	-2.111	down	K09392|2.7e-142|bna:106389535|K09392 transcription factor Dp-2 | (RefSeq) transcription factor-like protein DPA	--
gene_Bol010115	gene_Bol010115	LOC106296242	6.40426	6.94992	5.27245	4.20697	3.00546	5.54462	1.63865	0.258487	0.207341	-0.846373	down	-2.1891	down	K01802|5.6e-10|fve:101303016|K01802 peptidylprolyl isomerase [EC:5.2.1.8] | (RefSeq) peptidyl-prolyl cis-trans isomerase FKBP12-like	--
gene_Bol010129	gene_Bol010129	--	29.7088	30.0732	33.4121	5.47537	4.14434	7.64484	1.22134	2.0638	1.03092	-2.73959	down	-1.61511	down	--	--
gene_Bol010173	gene_Bol010173	LOC103834898	74.9597	138.834	112.635	54.9901	61.5943	69.8027	9.88395	21.8043	4.03676	-1.11675	down	-2.08946	down	K11294|2.1e-150|bna:106427405|K11294 nucleolin | (RefSeq) 31 kDa ribonucleoprotein, chloroplastic	--
gene_Bol010267	gene_Bol010267	--	20.8664	64.3969	35.9325	11.4865	11.8572	12.5331	5.44603	5.83068	0.847839	-2.06489	down	-1.2929	down	K00927|1.3e-258|boe:106295617|K00927 phosphoglycerate kinase [EC:2.7.2.3] | (RefSeq) phosphoglycerate kinase 1, chloroplastic	Glycolysis / Gluconeogenesis (ko00010);; Carbon fixation in photosynthetic organisms (ko00710);; Carbon metabolism (ko01200);; Biosynthesis of amino acids (ko01230)
gene_Bol010344	gene_Bol010344	LOC103845892	58.5651	40.2437	27.2445	26.1949	25.1988	31.5301	10.2353	12.9455	3.74428	-0.891455	down	-1.30229	down	K02989|2.1e-109|bna:106351362|K02989 small subunit ribosomal protein S5e | (RefSeq) 40S ribosomal protein S5-1-like	Ribosome (ko03010)
gene_Bol010439	gene_Bol010439	LOC111206485	21.1363	26.3329	24.1874	17.4987	19.4066	18.9452	4.55847	7.6163	1.05714	-0.660553	down	-1.79505	down	K01358|7.3e-158|bna:111206485|K01358 ATP-dependent Clp protease, protease subunit [EC:3.4.21.92] | (RefSeq) ATP-dependent Clp protease proteolytic subunit-related protein 2, chloroplastic-like	--
gene_Bol010475	gene_Bol010475	LOC106321114	32.4838	105.26	63.4023	8.34544	15.9747	17.0085	2.0427	2.81031	0.366449	-2.59056	down	-2.68076	down	K02723|3.6e-98|bna:106381141|K02723 photosystem II PsbY protein | (RefSeq) photosystem II core complex proteins psbY, chloroplastic-like	Photosynthesis (ko00195)
gene_Bol010624	gene_Bol010624	LOC106335954	9.60671	5.57643	7.19636	2.52238	1.81218	2.45998	1.13412	1.15707	0.651443	-2.01372	down	-0.826821	down	K21989|0.0e+00|boe:106335954|K21989 calcium permeable stress-gated cation channel | (RefSeq) calcium permeable stress-gated cation channel 1-like	--
gene_Bol010658	gene_Bol010658	LOC111204746	21.3579	12.8012	10.9047	4.22124	3.57681	3.66954	0.406871	0.657273	0	-2.25756	down	-3.15583	down	--	--
gene_Bol010681	gene_Bol010681	LOC106334716	75.0501	63.0106	58.1346	28.5035	26.8233	40.2915	8.82165	9.47754	11.3893	-1.33581	down	-1.22309	down	--	--
gene_Bol010742	gene_Bol010742	--	39.6626	33.6362	26.4564	7.06426	6.38731	5.65042	1.47363	3.01118	0.803058	-2.67342	down	-1.5128	down	K12126|8.7e-16|ppp:112286119|K12126 phytochrome-interacting factor 3 | (RefSeq) uncharacterized protein LOC112286119	Plant hormone signal transduction (ko04075);; Circadian rhythm - plant (ko04712)
gene_Bol010770	gene_Bol010770	LOC106331498	47.7754	101.999	69.7122	30.9134	41.9054	46.0105	21.9058	24.366	13.4107	-1.19218	down	-0.627696	down	K02931|1.1e-139|boe:106331498|K02931 large subunit ribosomal protein L5 | (RefSeq) 50S ribosomal protein L5, chloroplastic	Ribosome (ko03010)
gene_Bol010807	gene_Bol010807	LOC106300824	57.9472	105.212	94.2036	30.9617	40.457	41.4217	20.6424	14.5768	3.11143	-1.49632	down	-1.28499	down	K12502|2.3e-198|bna:106410579|K12502 MPBQ/MSBQ methyltransferase [EC:2.1.1.295] | (RefSeq) 2-methyl-6-phytyl-1,4-hydroquinone methyltransferase, chloroplastic isoform X1	Ubiquinone and other terpenoid-quinone biosynthesis (ko00130)
gene_Bol010832	gene_Bol010832	LOC106296372	41.3356	38.6775	40.8392	30.3228	36.2745	29.0637	13.1052	16.1667	6.71148	-0.631994	down	-1.06954	down	--	--
gene_Bol010839	gene_Bol010839	--	14.3775	15.2555	19.555	8.73247	13.1369	16.2753	4.6986	6.99957	1.88596	-0.671938	down	-1.16906	down	--	--
gene_Bol011014	gene_Bol011014	LOC106320370	14.7788	16.838	13.755	6.95196	8.21891	10.8488	3.1387	3.48898	0.929035	-1.10185	down	-1.45873	down	--	--
gene_Bol011065	gene_Bol011065	LOC106341843	570.214	1742.04	1518.44	58.0836	37.464	368.783	19.2781	4.58868	0.550307	-3.38638	down	-3.99007	down	K19892|2.0e-48|mus:103975262|K19892 glucan endo-1,3-beta-glucosidase 4 [EC:3.2.1.39] | (RefSeq) glucan endo-1,3-beta-glucosidase 4 isoform X2	Starch and sucrose metabolism (ko00500)
gene_Bol011072	gene_Bol011072	LOC111198138	8.69626	5.33135	2.67136	3.83111	2.78533	2.62281	0.797864	1.05493	0.07847	-1.13236	down	-2.00082	down	K11699|0.0e+00|bna:111198138|K11699 RNA-dependent RNA polymerase [EC:2.7.7.48] | (RefSeq) RNA-dependent RNA polymerase 6-like	--
gene_Bol011127	gene_Bol011127	LOC106295334	45.473	60.8563	52.4985	13.8452	6.74439	17.4355	7.79532	3.43376	1.41272	-2.37378	down	-1.2742	down	K02968|9.8e-102|boe:106295334|K02968 small subunit ribosomal protein S20 | (RefSeq) 30S ribosomal protein S20, chloroplastic	Ribosome (ko03010)
gene_Bol011133	gene_Bol011133	--	3.52722	3.47376	3.79087	1.87742	1.88033	1.29667	0.503026	0.404465	0.563754	-1.37514	down	-1.33597	down	K17506|1.5e-161|bna:106397444|K17506 protein phosphatase 1L [EC:3.1.3.16] | (RefSeq) probable protein phosphatase 2C 39	--
gene_Bol011142	gene_Bol011142	LOC106294638	2.80449	2.07783	2.278	1.66356	1.35694	1.92749	0.337823	0.741145	0.070129	-0.828492	down	-1.80528	down	K16240|5.9e-152|nnu:104603953|K16240 protein suppressor of PHYA-105 1 | (RefSeq) protein SPA1-RELATED 2-like	Circadian rhythm - plant (ko04712)
gene_Bol011152	gene_Bol011152	--	3.92136	11.2937	5.78479	1.37736	2.49691	1.82075	0.492381	0.331177	0.607534	-2.17653	down	-1.50117	down	--	--
gene_Bol011156	gene_Bol011156	LOC106397096	8.90461	10.3595	7.85885	5.2999	7.09054	7.36435	3.39179	3.605	1.60675	-0.752628	down	-0.854168	down	--	--
gene_Bol011201	gene_Bol011201	LOC106296115	39.6228	16.5506	16.8375	6.01128	4.70389	7.85773	3.28144	2.17289	1.88704	-2.26058	down	-0.949043	down	--	--
gene_Bol011216	gene_Bol011216	LOC106343360	496.717	782.404	787.127	205.637	224.086	386.979	97.2115	107.153	23.9743	-1.65383	down	-1.54606	down	K02695|1.4e-75|bna:106401521|K02695 photosystem I subunit VI | (RefSeq) photosystem I reaction center subunit VI-1, chloroplastic	Photosynthesis (ko00195)
gene_Bol011464	gene_Bol011464	LOC106318108	61.7806	76.5481	70.5341	7.06858	6.45447	10.2373	1.61376	4.47994	0.259115	-3.44203	down	-1.64074	down	K17525|6.1e-218|boe:106318108|K17525 chitinase domain-containing protein 1 | (RefSeq) rhodanese-like domain-containing protein 4, chloroplastic	--
gene_Bol011467	gene_Bol011467	LOC106318612	71.0383	40.3832	39.7061	14.0014	16.7489	11.8671	4.68676	5.20958	0.984848	-2.10575	down	-1.69011	down	K23877|1.0e-86|hbr:110647888|K23877 xyloglucan O-acetyltransferase | (RefSeq) protein ALTERED XYLOGLUCAN 4-like	--
gene_Bol011472	gene_Bol011472	--	227.906	371.11	416.817	33.4875	39.5203	58.2097	7.30031	12.4143	1.59559	-3.26587	down	-2.3455	down	K01092|9.2e-39|boe:106307850|K01092 myo-inositol-1(or 4)-monophosphatase [EC:3.1.3.25] | (RefSeq) phosphatase IMPL1, chloroplastic-like isoform X1	Inositol phosphate metabolism (ko00562);; Phosphatidylinositol signaling system (ko04070)
gene_Bol011485	gene_Bol011485	LOC106318009	43.3239	83.6875	70.8461	26.4816	31.3529	45.7917	6.44797	9.08434	1.88729	-1.24583	down	-2.27337	down	K02931|1.3e-140|boe:106318009|K02931 large subunit ribosomal protein L5 | (RefSeq) 50S ribosomal protein L5, chloroplastic	Ribosome (ko03010)
gene_Bol011497	gene_Bol011497	--	2.92367	2.35442	1.31726	1.84846	1.42081	0.867686	0.091934	0.232789	0.053591	-0.944077	down	-2.99307	down	K14500|1.4e-284|boe:106313502|K14500 BR-signaling kinase [EC:2.7.11.1] | (RefSeq) probable serine/threonine-protein kinase At5g41260	Plant hormone signal transduction (ko04075)
gene_Bol011514	gene_Bol011514	LOC106319101	500.181	403.489	198.271	20.2254	27.7258	12.0808	0.149922	2.42456	0.156503	-4.47005	down	-4.18784	down	K09872|1.9e-164|boe:106319101|K09872 aquaporin PIP | (RefSeq) probable aquaporin PIP1-4	--
gene_Bol011515	gene_Bol011515	LOC106313268	4.45079	2.14788	1.41209	1.43268	0.923413	0.781889	0	0.213138	0	-1.61443	down	-3.62267	down	K13508|2.8e-285|boe:106313268|K13508 glycerol-3-phosphate acyltransferase [EC:2.3.1.15 2.3.1.198] | (RefSeq) probable glycerol-3-phosphate acyltransferase 8	Glycerolipid metabolism (ko00561);; Glycerophospholipid metabolism (ko00564)
gene_Bol011517	gene_Bol011517	LOC106318020	186.346	111.959	130.639	10.5609	10.3979	13.1301	4.96375	6.95355	2.60184	-3.94546	down	-0.889566	down	K15398|0.0e+00|boe:106318020|K15398 fatty acid omega-hydroxylase [EC:1.14.-.-] | (RefSeq) cytochrome P450 86A2	Cutin, suberine and wax biosynthesis (ko00073)
gene_Bol011626	gene_Bol011626	LOC106307221	23.0212	27.8795	24.7441	1.48069	1.24156	1.55141	0.214001	0.198327	0.056876	-4.43426	down	-2.75939	down	K00218|4.2e-223|boe:106307221|K00218 protochlorophyllide reductase [EC:1.3.1.33] | (RefSeq) protochlorophyllide reductase C, chloroplastic-like isoform X1	Porphyrin and chlorophyll metabolism (ko00860)
gene_Bol011740	gene_Bol011740	LOC106341873	25.065	22.4962	21.2913	7.50596	6.84178	8.76613	4.61934	4.93997	1.82764	-1.87354	down	-0.691783	down	K10773|1.4e-15|cme:CYME_CMD139C|K10773 endonuclease III [EC:4.2.99.18] | (RefSeq) similar to endonuclease III	Base excision repair (ko03410)
gene_Bol011910	gene_Bol011910	--	17.8362	22.84	21.4814	9.87706	8.16498	12.1597	4.11965	3.04043	0.145231	-1.34901	down	-1.80508	down	K00592|5.8e-25|fve:101298121|K00592 [ribulose-bisphosphate carboxylase]/[fructose-bisphosphate aldolase]-lysine N-methyltransferase [EC:2.1.1.127 2.1.1.259] | (RefSeq) ribulose-1,5 bisphosphate carboxylase/oxygenase large subunit N-methyltransferase, chloroplastic	--
gene_Bol011912	gene_Bol011912	--	53.9469	71.1578	67.9891	2.79373	5.23543	2.96643	0.628818	0.718445	0	-4.42155	down	-2.81276	down	K23869|1.3e-290|bna:111204236|K23869 galactan beta-1,4-galactosyltransferase [EC:2.4.1.-] | (RefSeq) galactan beta-1,4-galactosyltransferase GALS3-like	--
gene_Bol012019	gene_Bol012019	LOC106388243	5.45135	6.60544	3.62552	2.21823	3.37024	3.13226	1.78849	0.990777	0.554124	-1.13418	down	-1.03988	down	K08867|0.0e+00|bna:106388243|K08867 WNK lysine deficient protein kinase [EC:2.7.11.1] | (RefSeq) serine/threonine-protein kinase WNK2	--
gene_Bol012074	gene_Bol012074	LOC106366907	127.301	200.26	211.257	45.7777	38.807	45.116	19.0764	23.2729	4.9387	-2.36507	down	-1.16521	down	--	--
gene_Bol012135	gene_Bol012135	LOC106347824	2.31682	1.72514	2.36033	1.19684	1.12373	1.28924	0.608424	0.698028	0.436338	-1.12021	down	-0.659671	down	K17675|0.0e+00|bna:106347824|K17675 ATP-dependent RNA helicase SUPV3L1/SUV3 [EC:3.6.4.13] | (RefSeq) DExH-box ATP-dependent RNA helicase DExH18, mitochondrial-like	--
gene_Bol012141	gene_Bol012141	LOC106446032	3.96157	4.29796	6.45884	1.60498	1.65122	1.38971	0.486076	0.404627	0	-1.96127	down	-2.12946	down	K15777|1.2e-26|mesc:110630336|K15777 4,5-DOPA dioxygenase extradiol [EC:1.13.11.-] | (RefSeq) uncharacterized protein LOC110630336	Betalain biosynthesis (ko00965)
gene_Bol012144	gene_Bol012144	LOC106432325	163.935	171.811	168.495	41.6744	64.1326	70.7619	7.23013	25.6178	13.6774	-1.81293	down	-1.51967	down	--	--
gene_Bol012187	gene_Bol012187	LOC106319070	10.9409	9.08902	5.70271	0.811094	0.956241	2.34532	0.381696	0.237555	0.179173	-2.94348	down	-1.95949	down	K15404|2.7e-123|smo:SELMODRAFT_129942|K15404 aldehyde decarbonylase [EC:4.1.99.5] | (RefSeq) CER1-2; hypothetical protein	Cutin, suberine and wax biosynthesis (ko00073)
gene_Bol012226	gene_Bol012226	LOC106313541	28.2556	24.8122	27.1052	14.3364	20.4126	20.1935	8.18858	8.25751	5.25108	-0.841599	down	-0.964394	down	K01792|4.8e-182|bna:106402281|K01792 glucose-6-phosphate 1-epimerase [EC:5.1.3.15] | (RefSeq) putative glucose-6-phosphate 1-epimerase	Glycolysis / Gluconeogenesis (ko00010)
gene_Bol012325	gene_Bol012325	--	15.7648	10.0687	10.0204	5.78313	4.14103	7.038	2.17912	1.71409	0.656176	-1.37637	down	-1.54665	down	K14638|1.6e-26|mng:MNEG_6196|K14638 solute carrier family 15 (peptide/histidine transporter), member 3/4 | (RefSeq) Peptide transporter PTR2	--
gene_Bol012334	gene_Bol012334	LOC106410477	81.61	82.765	58.985	15.7061	32.2531	41.9172	3.08248	12.1333	0.575129	-1.60888	down	-2.27129	down	K15378|5.2e-295|bna:106410477|K15378 solute carrier family 45, member 1/2/4 | (RefSeq) sucrose transport protein SUC2	--
gene_Bol012341	gene_Bol012341	LOC106304256	212.506	124.865	136.42	19.9365	30.5068	51.3897	8.0348	13.4661	1.97107	-2.51239	down	-1.83496	down	K09264|1.9e-06|dcr:108215272|K09264 MADS-box transcription factor, plant | (RefSeq) truncated transcription factor CAULIFLOWER D-like	--
gene_Bol012444	gene_Bol012444	LOC106329145	71.1784	99.2264	78.4715	47.7279	44.8395	45.3652	10.4895	18.4245	1.02643	-1.15218	down	-1.95979	down	--	--
gene_Bol012554	gene_Bol012554	LOC106426238	98.2707	141.893	52.4302	19.5297	38.7667	37.7309	1.62979	0.563168	0.095191	-1.89706	down	-5.10141	down	K01580|5.8e-291|bna:106426238|K01580 glutamate decarboxylase [EC:4.1.1.15] | (RefSeq) glutamate decarboxylase 2 isoform X1	Alanine, aspartate and glutamate metabolism (ko00250);; beta-Alanine metabolism (ko00410);; Taurine and hypotaurine metabolism (ko00430);; Butanoate metabolism (ko00650)
gene_Bol012596	gene_Bol012596	LOC106426277	25.9892	52.1395	50.0184	33.3067	29.6524	26.2301	14.8091	18.1164	5.37172	-0.832713	down	-0.909464	down	K21596|0.0e+00|bna:106426277|K21596 calmodulin-binding transcription activator | (RefSeq) calmodulin-binding transcription activator 4	--
gene_Bol012796	gene_Bol012796	LOC106452462	402.839	570.98	394.577	127.019	132.733	158.383	65.6103	83.5114	46.2976	-2.0124	down	-0.724375	down	K08915|4.2e-164|bna:106452462|K08915 light-harvesting complex II chlorophyll a/b binding protein 4 | (RefSeq) chlorophyll a-b binding protein CP29.1, chloroplastic	Photosynthesis - antenna proteins (ko00196)
gene_Bol012825	gene_Bol012825	--	352.648	336.217	382.535	253.684	254.256	351.541	47.393	100.592	12.9374	-0.622064	down	-2.14304	down	--	--
gene_Bol012966	gene_Bol012966	--	35.1655	25.1997	28.877	10.0021	16.2876	10.2263	3.0417	3.8208	0.486582	-1.57318	down	-2.01267	down	K16569|5.5e-55|sita:101783840|K16569 gamma-tubulin complex component 2 | (RefSeq) gamma-tubulin complex component 2	--
gene_Bol012983	gene_Bol012983	LOC106328067	81.7628	97.4258	167.907	10.3239	10.1662	18.7381	2.81847	8.03442	2.42573	-3.46431	down	-1.21917	down	K16297|6.6e-284|boe:106328067|K16297 serine carboxypeptidase-like clade II [EC:3.4.16.-] | (RefSeq) serine carboxypeptidase-like 29	--
gene_Bol013070	gene_Bol013070	LOC106308201	81.1769	75.8398	55.7577	24.7997	22.9332	37.4045	9.04086	11.1135	2.61835	-1.61977	down	-1.60064	down	K00218|1.3e-219|boe:106308201|K00218 protochlorophyllide reductase [EC:1.3.1.33] | (RefSeq) protochlorophyllide reductase B, chloroplastic	Porphyrin and chlorophyll metabolism (ko00860)
gene_Bol013087	gene_Bol013087	--	14.3583	9.85185	8.66029	7.10453	5.8254	5.01619	2.9549	3.61165	2.25494	-1.15956	down	-0.640333	down	K20221|0.0e+00|boe:106308244|K20221 importin-4 | (RefSeq) importin-4	--
gene_Bol013091	gene_Bol013091	LOC106312213	48.9425	85.1854	77.6131	31.8567	35.7459	40.4986	14.8483	26.7397	6.33594	-1.27871	down	-0.867815	down	K07556|6.9e-26|gsl:Gasu_39180|K07556 ATP synthase mitochondrial F1 complex assembly factor 2 | (RefSeq) ATP synthase mitochondrial F1 complex assembly factor 2	--
gene_Bol013150	gene_Bol013150	LOC106311991	50.9274	31.7397	43.9851	27.0705	27.1949	31.6656	12.699	19.8099	6.76615	-0.85516	down	-0.794907	down	K14503|1.5e-173|boe:106311991|K14503 brassinosteroid resistant 1/2 | (RefSeq) protein BRASSINAZOLE-RESISTANT 2-like	Plant hormone signal transduction (ko04075)
gene_Bol013168	gene_Bol013168	BNAC08G18580D	10.5941	11.1867	8.88974	6.46544	5.39265	2.92543	0.718309	1.63115	0.39672	-1.34302	down	-2.09942	down	K00789|2.0e-23|pper:18785694|K00789 S-adenosylmethionine synthetase [EC:2.5.1.6] | (RefSeq) S-adenosylmethionine synthase	Cysteine and methionine metabolism (ko00270);; Biosynthesis of amino acids (ko01230)
gene_Bol013237	gene_Bol013237	LOC106348633	11.514	13.102	10.9417	7.43172	8.02216	7.42976	3.05512	3.73066	2.5722	-0.932802	down	-0.896847	down	K02995|3.9e-30|adu:107464504|K02995 small subunit ribosomal protein S8e | (RefSeq) 40S ribosomal protein S8	Ribosome (ko03010)
gene_Bol013247	gene_Bol013247	LOC106358589	5.81604	5.00567	3.46328	3.78611	2.95458	2.8607	0.71759	2.20022	0.345219	-0.862407	down	-1.2569	down	K05681|1.3e-62|cme:CYME_CMS467C|K05681 ATP-binding cassette, subfamily G (WHITE), member 2 | (RefSeq) ATP-binding cassette, sub-family G, member 2	ABC transporters (ko02010)
gene_Bol013259	gene_Bol013259	--	7.35785	5.53633	5.5071	1.73358	1.94613	3.09274	0.340404	0.950765	0.660284	-1.72312	down	-1.33485	down	K17794|8.2e-97|bna:106358577|K17794 mitochondrial import inner membrane translocase subunit TIM23 | (RefSeq) mitochondrial import inner membrane translocase subunit TIM23-1-like	--
gene_Bol013312	gene_Bol013312	LOC106296437	5.92389	14.8285	5.14896	4.19294	2.95605	5.08209	1.35353	1.92894	1.25076	-1.39126	down	-1.02782	down	K19788|3.8e-228|boe:106296437|K19788 obg-like ATPase 1 | (RefSeq) ribosome-binding ATPase YchF	--
gene_Bol013327	gene_Bol013327	LOC106406186	430.097	625.051	620.457	100.477	115.653	148.935	37.7857	33.2011	3.86565	-2.50708	down	-2.02908	down	K08905|1.0e-82|bna:106406186|K08905 photosystem I subunit V | (RefSeq) photosystem I reaction center subunit V, chloroplastic	Photosynthesis (ko00195)
gene_Bol013334	gene_Bol013334	--	11.3827	32.3174	15.6267	3.67137	3.56923	3.77076	1.51003	1.5097	0.462183	-2.73555	down	-1.32918	down	K04077|1.6e-265|boe:106300192|K04077 chaperonin GroEL | (RefSeq) ruBisCO large subunit-binding protein subunit beta, chloroplastic	RNA degradation (ko03018)
gene_Bol013335	gene_Bol013335	LOC106300193	56.181	117.423	144.48	4.88867	4.76685	8.72635	0.498305	1.1062	0.354442	-4.43383	down	-2.85167	down	--	--
gene_Bol013588	gene_Bol013588	LOC106438535	2.29846	2.97725	1.9258	0.839775	0.61867	0.531761	0.172652	0.21975	0	-2.1406	down	-2.02829	down	K17508|8.2e-45|sly:101260900|K17508 protein phosphatase PTC7 [EC:3.1.3.16] | (RefSeq) probable protein phosphatase 2C 55	--
gene_Bol013642	gene_Bol013642	--	5.73001	8.16521	5.96609	5.16555	5.48318	5.14699	2.70327	2.00105	0.31915	-0.628388	down	-1.36992	down	--	--
gene_Bol013646	gene_Bol013646	LOC106401674	47.0945	48.3743	39.3697	3.97433	4.07689	6.02094	1.36663	2.37259	1.2504	-3.55965	down	-1.10266	down	K00128|5.9e-286|bna:106401674|K00128 aldehyde dehydrogenase (NAD+) [EC:1.2.1.3] | (RefSeq) aldehyde dehydrogenase family 3 member I1, chloroplastic	Glycolysis / Gluconeogenesis (ko00010);; Ascorbate and aldarate metabolism (ko00053);; Fatty acid degradation (ko00071);; Valine, leucine and isoleucine degradation (ko00280);; Lysine degradation (ko00310);; Arginine and proline metabolism (ko00330);; Histidine metabolism (ko00340);; Tryptophan metabolism (ko00380);; beta-Alanine metabolism (ko00410);; Glycerolipid metabolism (ko00561);; Pyruvate…
gene_Bol013647	gene_Bol013647	LOC106401674	39.0629	33.0801	32.0248	1.78194	2.65486	4.85379	1.13027	1.24036	0.586724	-3.78119	down	-1.27602	down	K00128|3.9e-224|bna:106401674|K00128 aldehyde dehydrogenase (NAD+) [EC:1.2.1.3] | (RefSeq) aldehyde dehydrogenase family 3 member I1, chloroplastic	Glycolysis / Gluconeogenesis (ko00010);; Ascorbate and aldarate metabolism (ko00053);; Fatty acid degradation (ko00071);; Valine, leucine and isoleucine degradation (ko00280);; Lysine degradation (ko00310);; Arginine and proline metabolism (ko00330);; Histidine metabolism (ko00340);; Tryptophan metabolism (ko00380);; beta-Alanine metabolism (ko00410);; Glycerolipid metabolism (ko00561);; Pyruvate…
gene_Bol013681	gene_Bol013681	LOC106353827	79.8578	97.9852	110.566	45.1783	52.0225	53.835	27.3819	19.7269	6.34192	-1.23721	down	-1.1923	down	K02959|1.4e-59|bna:106353827|K02959 small subunit ribosomal protein S16 | (RefSeq) 30S ribosomal protein S16-1, chloroplastic	Ribosome (ko03010)
gene_Bol013772	gene_Bol013772	LOC106344037	109.523	56.9386	66.6156	29.2249	30.6172	25.4065	11.044	13.9752	8.26648	-1.73342	down	-0.978486	down	--	--
gene_Bol013797	gene_Bol013797	LOC111213763	26.1308	29.8059	36.8669	15.4215	18.9585	24.7304	2.53181	7.4908	2.33712	-0.957207	down	-1.90464	down	--	--
gene_Bol013836	gene_Bol013836	BNAC05G35540D	117.086	134.411	154.998	87.7397	87.4364	120.682	33.5818	34.7729	6.37547	-0.766392	down	-1.70509	down	--	--
gene_Bol013913	gene_Bol013913	LOC106295747	9.67198	16.2622	12.2863	6.93685	5.01732	6.7585	1.24287	2.76818	0.16209	-1.33732	down	-1.90807	down	--	--
gene_Bol013915	gene_Bol013915	LOC106433536	6.12152	12.0025	9.66139	2.54169	2.78014	2.94807	0.836684	0.755785	0	-2.05052	down	-2.1261	down	--	--
gene_Bol014028	gene_Bol014028	LOC106361527	184.899	387.257	417.13	79.253	77.3386	86.4847	19.5781	41.5499	11.3597	-2.33961	down	-1.4203	down	K22048|1.4e-23|csv:101209209|K22048 mechanosensitive ion channel protein 4/5/6/7/8/9/10 | (RefSeq) mechanosensitive ion channel protein 10	--
gene_Bol014032	gene_Bol014032	--	90.9589	190.601	164.087	34.0081	31.6273	37.5025	4.29174	12.3131	0.79495	-2.4233	down	-2.31699	down	K01915|9.3e-253|bna:106361531|K01915 glutamine synthetase [EC:6.3.1.2] | (RefSeq) glutamine synthetase, chloroplastic-like precursor	Arginine biosynthesis (ko00220);; Alanine, aspartate and glutamate metabolism (ko00250);; Glyoxylate and dicarboxylate metabolism (ko00630);; Nitrogen metabolism (ko00910);; Biosynthesis of amino acids (ko01230)
gene_Bol014038	gene_Bol014038	LOC106418922	59.3192	59.8496	42.9902	34.2194	23.6202	27.3963	5.98334	8.60387	0.74633	-1.22431	down	-2.21907	down	K00036|0.0e+00|bna:106418922|K00036 glucose-6-phosphate 1-dehydrogenase [EC:1.1.1.49 1.1.1.363] | (RefSeq) glucose-6-phosphate 1-dehydrogenase 1, chloroplastic	Pentose phosphate pathway (ko00030);; Glutathione metabolism (ko00480);; Carbon metabolism (ko01200)
gene_Bol014048	gene_Bol014048	LOC106381948	77.7742	135.678	156.975	3.68175	4.51025	5.83384	1.25187	1.62332	0.417041	-5.03469	down	-1.74547	down	K00855|8.2e-227|bna:106381948|K00855 phosphoribulokinase [EC:2.7.1.19] | (RefSeq) phosphoribulokinase, chloroplastic	Carbon fixation in photosynthetic organisms (ko00710);; Carbon metabolism (ko01200)
gene_Bol014182	gene_Bol014182	LOC106418951	53.2709	114.452	120.764	4.58212	5.40332	6.53099	1.1997	1.98426	0	-4.43924	down	-2.13407	down	K02437|2.0e-86|bna:106418951|K02437 glycine cleavage system H protein | (RefSeq) glycine cleavage system H protein 3, mitochondrial-like	Glycine, serine and threonine metabolism (ko00260);; Glyoxylate and dicarboxylate metabolism (ko00630);; Carbon metabolism (ko01200)
gene_Bol014184	gene_Bol014184	--	38.1518	48.5454	51.0993	13.4352	16.6772	22.7189	2.10782	8.45615	1.27952	-1.68859	down	-1.85446	down	K02639|1.1e-98|bna:106418727|K02639 ferredoxin | (RefSeq) uncharacterized protein LOC106418727	Photosynthesis (ko00195)
gene_Bol014228	gene_Bol014228	LOC106452561	8.00311	9.44117	8.86273	7.04572	6.41755	5.76184	2.06321	2.79007	1.42234	-0.749685	down	-1.23138	down	K12846|9.3e-62|bna:106452561|K12846 U4/U6.U5 tri-snRNP-associated protein 3 | (RefSeq) U4/U6.U5 small nuclear ribonucleoprotein 27 kDa protein isoform X1	Spliceosome (ko03040)
gene_Bol014324	gene_Bol014324	LOC106313124	300.365	678.823	434.911	160.313	180.714	123.428	31.5598	55.5345	11.6048	-1.90769	down	-1.94244	down	K02639|9.8e-77|bna:106406012|K02639 ferredoxin | (RefSeq) ferredoxin, leaf L-A-like	Photosynthesis (ko00195)
gene_Bol014347	gene_Bol014347	LOC106318558	59.5141	84.4059	73.2684	45.2689	55.1362	58.1736	16.0385	21.9643	2.7142	-0.757173	down	-1.69931	down	K01648|3.3e-242|boe:106318558|K01648 ATP citrate (pro-S)-lyase [EC:2.3.3.8] | (RefSeq) ATP-citrate synthase alpha chain protein 2	Citrate cycle (TCA cycle) (ko00020)
gene_Bol014370	gene_Bol014370	--	18.0137	21.9998	12.3748	8.12647	8.82088	11.3831	3.80655	4.07041	3.64005	-1.18438	down	-0.877713	down	K23490|7.5e-17|mus:103975620|K23490 cytochrome b5 | (RefSeq) cytochrome b5	--
gene_Bol014394	gene_Bol014394	LOC106336927	6.25344	8.14476	8.09012	4.64091	6.12569	3.49216	1.97982	1.67349	0.289689	-0.948795	down	-1.54664	down	K03768|7.0e-142|bna:106396794|K03768 peptidyl-prolyl cis-trans isomerase B (cyclophilin B) [EC:5.2.1.8] | (RefSeq) peptidyl-prolyl cis-trans isomerase CYP20-3, chloroplastic-like	--
gene_Bol014453	gene_Bol014453	LOC106396732	59.2922	150.239	119.937	11.8897	11.2235	12.5002	2.20599	2.78583	0.812863	-3.52152	down	-2.28989	down	--	--
gene_Bol014457	gene_Bol014457	--	58.7021	96.4528	65.027	43.9942	32.5393	43.7013	16.9027	17.5041	3.42812	-1.17948	down	-1.38129	down	K02838|6.2e-130|boe:106336866|K02838 ribosome recycling factor | (RefSeq) ribosome-recycling factor, chloroplastic-like isoform X1	--
gene_Bol014478	gene_Bol014478	--	214.179	293.446	266.727	165.509	179.391	212.747	61.3137	74.5548	14.2379	-0.779142	down	-1.61181	down	K02863|7.0e-163|bna:106396751|K02863 large subunit ribosomal protein L1 | (RefSeq) 50S ribosomal protein L1, chloroplastic	Ribosome (ko03010)
gene_Bol014479	gene_Bol014479	LOC106341879	131.753	229.867	250.318	94.0845	91.4077	137.208	38.7761	58.6458	17.9631	-1.23914	down	-1.16054	down	K00465|4.2e-249|boe:106341879|K00465 carotenoid 9,10(9',10')-cleavage dioxygenase 1 [EC:1.13.11.-] | (RefSeq) carotenoid 9,10(9',10')-cleavage dioxygenase 1	--
gene_Bol014704	gene_Bol014704	--	97.1547	84.5532	128.35	41.5999	40.5185	51.3612	13.9881	7.97304	0.592036	-1.52171	down	-2.31671	down	K02639|9.7e-80|bna:106372724|K02639 ferredoxin | (RefSeq) uncharacterized protein LOC106372724	Photosynthesis (ko00195)
gene_Bol014747	gene_Bol014747	LOC106315573	92.846	101.857	113.103	17.5987	11.9783	24.9271	4.31066	3.74634	1.29539	-2.80878	down	-2.21708	down	K04040|1.2e-219|bna:106349059|K04040 chlorophyll/bacteriochlorophyll a synthase [EC:2.5.1.62 2.5.1.133] | (RefSeq) chlorophyll synthase, chloroplastic	Porphyrin and chlorophyll metabolism (ko00860)
gene_Bol014767	gene_Bol014767	LOC106336761	16.7745	19.9032	17.9768	7.2662	7.25135	9.00371	4.76232	4.35118	2.85011	-1.51895	down	-0.598351	down	K14491|0.0e+00|bna:106446688|K14491 two-component response regulator ARR-B family | (RefSeq) two-component response regulator ARR12 isoform X1	Plant hormone signal transduction (ko04075)
gene_Bol014796	gene_Bol014796	--	9.70212	6.43092	7.09149	3.66999	3.8149	4.25299	1.99005	1.44702	0.527599	-1.2768	down	-1.23858	down	K19891|1.6e-280|bna:106405722|K19891 glucan endo-1,3-beta-glucosidase 1/2/3 [EC:3.2.1.39] | (RefSeq) glucan endo-1,3-beta-glucosidase 3-like	Starch and sucrose metabolism (ko00500)
gene_Bol014861	gene_Bol014861	--	11.6937	8.59792	10.4615	2.44117	2.55946	3.16523	1.05827	0.787715	0.116606	-2.19937	down	-1.72655	down	--	--
gene_Bol014868	gene_Bol014868	--	1.33326	2.70397	3.16672	1.09235	0.772628	1.35279	0.255969	0.15666	0.258706	-1.46387	down	-1.78988	down	K00787|1.8e-223|bna:106381942|K00787 farnesyl diphosphate synthase [EC:2.5.1.1 2.5.1.10] | (RefSeq) farnesyl pyrophosphate synthase 2-like isoform X1	Terpenoid backbone biosynthesis (ko00900)
gene_Bol014895	gene_Bol014895	--	12.3358	9.90552	9.07705	1.16858	1.15019	1.21201	0.323763	0.112552	0.038554	-3.43366	down	-2.47094	down	K01426|1.1e-273|bna:106416484|K01426 amidase [EC:3.5.1.4] | (RefSeq) putative amidase C869.01	Arginine and proline metabolism (ko00330);; Phenylalanine metabolism (ko00360);; Tryptophan metabolism (ko00380)
gene_Bol014910	gene_Bol014910	LOC106311496	4.21303	3.14376	2.82269	1.97578	1.91712	1.70726	0.695246	1.07674	0.403201	-1.15152	down	-1.01364	down	K14794|0.0e+00|boe:106311496|K14794 ribosomal RNA-processing protein 12 | (RefSeq) RRP12-like protein	--
gene_Bol014968	gene_Bol014968	--	19.8035	14.7965	18.4417	2.77143	4.93061	3.74932	0.762666	0.887789	0.044128	-2.49773	down	-2.48477	down	--	--
gene_Bol014985	gene_Bol014985	LOC106375746	73.5865	104.629	167.533	13.4698	8.73875	12.563	0.698953	1.35278	0.135739	-3.63113	down	-3.65245	down	--	--
gene_Bol015024	gene_Bol015024	LOC106401152	40.1125	75.2928	64.1375	28.2469	33.9365	44.8045	11.1189	11.4393	5.57559	-1.05775	down	-1.57087	down	--	--
gene_Bol015058	gene_Bol015058	--	16.9304	27.9233	20.2456	5.10359	5.87131	8.39943	1.86587	2.86783	0.402545	-2.05504	down	-1.62685	down	K09919|3.1e-278|bna:111204458|K09919 uncharacterized protein | (RefSeq) uncharacterized protein LOC111204458	--
gene_Bol015067	gene_Bol015067	--	17.2289	21.5419	14.6313	9.25954	11.1351	11.1617	5.07521	4.98113	0.781393	-1.05559	down	-1.26715	down	K01968|6.4e-144|tcc:18613295|K01968 3-methylcrotonyl-CoA carboxylase alpha subunit [EC:6.4.1.4] | (RefSeq) methylcrotonoyl-CoA carboxylase subunit alpha, mitochondrial	Valine, leucine and isoleucine degradation (ko00280)
gene_Bol015174	gene_Bol015174	LOC106319136	3.7957	2.63752	2.88642	2.11422	1.82214	2.72071	0.867817	1.19271	0.258259	-0.783418	down	-1.18888	down	K09422|1.8e-254|boe:106319136|K09422 transcription factor MYB, plant | (RefSeq) myb-related protein 3R-1	--
gene_Bol015210	gene_Bol015210	--	8.88396	13.7023	13.6094	7.07708	8.00319	9.27069	2.50232	4.07486	1.31102	-0.880056	down	-1.28214	down	K15285|6.9e-73|cmax:111477885|K15285 solute carrier family 35, member E3 | (RefSeq) UDP-rhamnose/UDP-galactose transporter 4-like	--
gene_Bol015215	gene_Bol015215	--	13.0492	18.2458	22.419	8.40483	13.9167	10.597	5.29426	4.83497	2.17362	-1.0089	down	-1.07225	down	K11827|4.8e-48|bna:111205183|K11827 AP-2 complex subunit sigma-1 | (RefSeq) AP-2 complex subunit sigma-like	Endocytosis (ko04144)
gene_Bol015260	gene_Bol015260	--	41.2377	63.7983	86.4145	22.822	27.9731	34.3297	7.03906	2.5848	0.541661	-1.484	down	-2.78555	down	--	--
gene_Bol015310	gene_Bol015310	LOC103855481	24.2891	20.8955	42.8159	7.80325	12.0924	11.9333	4.81094	4.68714	1.82423	-1.7735	down	-1.15688	down	K00856|4.8e-199|bna:106428747|K00856 adenosine kinase [EC:2.7.1.20] | (RefSeq) adenosine kinase 2	Purine metabolism (ko00230)
gene_Bol015408	gene_Bol015408	LOC106328380	19.5216	24.5193	30.6082	3.20093	3.1404	2.53324	1.1676	1.38209	0.340403	-3.36831	down	-1.30253	down	--	--
gene_Bol015410	gene_Bol015410	LOC106334684	13.1227	20.6583	17.8096	12.5593	12.4319	15.4689	6.06298	6.16979	1.45497	-0.658263	down	-1.26597	down	K08869|3.7e-288|boe:106334684|K08869 aarF domain-containing kinase | (RefSeq) uncharacterized aarF domain-containing protein kinase At5g05200, chloroplastic	--
gene_Bol015426	gene_Bol015426	--	12.3061	19.3316	18.7335	10.4538	11.8728	13.4963	5.73338	6.63113	3.89667	-0.80002	down	-0.762062	down	--	--
gene_Bol015453	gene_Bol015453	LOC106335553	4.59514	10.6411	7.45299	0.717607	1.26155	0.741077	0.126098	0.145474	0.154563	-3.3474	down	-2.18342	down	--	--
gene_Bol015495	gene_Bol015495	LOC106322680	29.8786	52.9123	53.8463	8.83259	7.13761	8.47008	0.719288	1.67651	0	-2.79186	down	-3.07529	down	--	--
gene_Bol015510	gene_Bol015510	--	14.1551	14.7693	13.2309	9.85383	10.5818	12.9944	7.33436	5.10295	2.79324	-0.635409	down	-0.77998	down	K17412|1.3e-10|smo:SELMODRAFT_441545|K17412 small subunit ribosomal protein S34 | (RefSeq) hypothetical protein	--
gene_Bol015545	gene_Bol015545	LOC106388230	22.3202	32.8262	40.9821	14.3391	15.7246	23.2563	7.8202	6.65323	0.572008	-1.16428	down	-1.57645	down	K00051|1.9e-256|bna:106388230|K00051 malate dehydrogenase (NADP+) [EC:1.1.1.82] | (RefSeq) malate dehydrogenase [NADP], chloroplastic-like	Pyruvate metabolism (ko00620);; Carbon fixation in photosynthetic organisms (ko00710);; Carbon metabolism (ko01200)
gene_Bol015550	gene_Bol015550	LOC106324775	3.75438	4.5371	4.0374	2.39021	1.87219	2.80506	1.0257	0.912567	0.239501	-1.11082	down	-1.36121	down	K10752|4.7e-233|bna:106388250|K10752 histone-binding protein RBBP4 | (RefSeq) histone-binding protein MSI1	--
gene_Bol015676	gene_Bol015676	LOC106296239	21.5718	16.6493	17.5142	12.2889	9.36198	10.2154	4.36025	5.59863	3.30952	-1.10227	down	-0.880231	down	K23200|3.7e-69|ccav:112513488|K23200 putative arabinosyltransferase [EC:2.4.2.-] | (RefSeq) probable arabinosyltransferase ARAD1	--
gene_Bol015839	gene_Bol015839	--	15.9765	14.1878	15.1019	6.72743	6.62471	7.75708	3.63862	3.92747	1.96421	-1.39916	down	-0.778967	down	K02493|1.2e-202|boe:106329427|K02493 release factor glutamine methyltransferase [EC:2.1.1.297] | (RefSeq) release factor glutamine methyltransferase	--
gene_Bol015912	gene_Bol015912	LOC106335484	52.9763	78.9251	67.7029	14.8405	13.7788	23.6358	6.16327	9.27433	0.846184	-2.24396	down	-1.42525	down	K13457|3.6e-143|vvi:100252764|K13457 disease resistance protein RPM1 | (RefSeq) uncharacterized protein sll1770	Plant-pathogen interaction (ko04626)
gene_Bol015981	gene_Bol015981	--	12.291	12.1905	12.1586	6.49532	5.13699	5.95258	3.2065	3.11771	2.39105	-1.35895	down	-0.61799	down	K14548|0.0e+00|bna:106389594|K14548 U3 small nucleolar RNA-associated protein 4 | (RefSeq) U3 small nucleolar RNA-associated protein 4 homolog	Ribosome biogenesis in eukaryotes (ko03008)
gene_Bol016016	gene_Bol016016	--	21.0995	31.5355	29.4673	20.2341	23.7046	23.5892	5.71207	4.45678	0.727653	-0.586325	down	-2.35789	down	K15111|2.4e-176|bna:106381987|K15111 solute carrier family 25 (mitochondrial S-adenosylmethionine transporter), member 26 | (RefSeq) S-adenosylmethionine carrier 1, chloroplastic/mitochondrial	--
gene_Bol016047	gene_Bol016047	--	697.282	1315.99	1536.66	42.0585	37.6564	48.7845	3.53046	3.23617	3.90514	-5.10391	down	-3.14082	down	K01623|6.2e-219|bna:106405688|K01623 fructose-bisphosphate aldolase, class I [EC:4.1.2.13] | (RefSeq) fructose-bisphosphate aldolase 2, chloroplastic-like	Glycolysis / Gluconeogenesis (ko00010);; Pentose phosphate pathway (ko00030);; Fructose and mannose metabolism (ko00051);; Carbon fixation in photosynthetic organisms (ko00710);; Carbon metabolism (ko01200);; Biosynthesis of amino acids (ko01230)
gene_Bol016058	gene_Bol016058	LOC106335281	211.518	278.38	117.441	20.1187	16.1422	27.2267	1.91302	4.25782	0.096353	-3.55631	down	-3.1003	down	--	--
gene_Bol016108	gene_Bol016108	--	13.2881	10.6241	6.80925	8.05113	8.0564	6.00597	0.57548	1.95746	0.352349	-0.757814	down	-2.62297	down	K03453|1.0e-08|han:110873038|K03453 bile acid:Na+ symporter, BASS family | (RefSeq) probable sodium/metabolite cotransporter BASS3, chloroplastic	--
gene_Bol016111	gene_Bol016111	LOC106328978	203.552	515.746	336.313	42.8714	42.4833	53.8103	14.9814	15.4189	4.33835	-3.23323	down	-1.68763	down	K02698|8.3e-64|boe:106328978|K02698 photosystem I subunit X | (RefSeq) photosystem I reaction center subunit psaK, chloroplastic-like	Photosynthesis (ko00195)
gene_Bol016112	gene_Bol016112	LOC106335004	327.249	441.42	321.424	27.9295	24.671	30.0238	2.74406	12.3316	5.25271	-4.02401	down	-1.63817	down	K21989|0.0e+00|boe:106335004|K21989 calcium permeable stress-gated cation channel | (RefSeq) CSC1-like protein ERD4	--
gene_Bol016149	gene_Bol016149	LOC106300013	6.59905	6.53425	6.29963	2.58406	2.36489	2.29945	0.725555	1.0398	0.379326	-1.71654	down	-1.39105	down	K05539|2.3e-207|boe:106300013|K05539 tRNA-dihydrouridine synthase A [EC:1.-.-.-] | (RefSeq) tRNA-dihydrouridine(20/20a) synthase	--
gene_Bol016202	gene_Bol016202	LOC106450809	10.621	8.57807	5.34688	5.8399	5.84015	6.00294	1.05761	2.23255	0.658803	-0.758987	down	-1.80971	down	K06269|3.4e-188|bna:106450809|K06269 serine/threonine-protein phosphatase PP1 catalytic subunit [EC:3.1.3.16] | (RefSeq) serine/threonine-protein phosphatase PP1 isozyme 4-like	mRNA surveillance pathway (ko03015)
gene_Bol016216	gene_Bol016216	LOC106396197	198.743	276.381	343.339	11.0523	9.60992	24.474	4.98027	7.1743	1.21272	-4.50134	down	-1.46397	down	K09753|2.3e-07|dosa:Os09t0262000-00|K09753 cinnamoyl-CoA reductase [EC:1.2.1.44] | (RefSeq) Os09g0262000; Similar to Cinnamoyl CoA reductase.	Phenylpropanoid biosynthesis (ko00940)
gene_Bol016256	gene_Bol016256	LOC106341919	5.24298	3.09668	7.24056	1.77116	1.22041	2.58986	0.406931	0.627382	0.204733	-1.79392	down	-1.8037	down	K05681|1.5e-93|var:108331191|K05681 ATP-binding cassette, subfamily G (WHITE), member 2 | (RefSeq) ABC transporter G family member 5-like	ABC transporters (ko02010)
gene_Bol016274	gene_Bol016274	LOC106318485	101.291	108.16	91.9066	40.4147	38.9055	34.4109	16.9785	22.3652	8.55698	-1.70163	down	-0.912051	down	K02492|8.6e-293|bna:106436733|K02492 glutamyl-tRNA reductase [EC:1.2.1.70] | (RefSeq) glutamyl-tRNA reductase 1, chloroplastic	Porphyrin and chlorophyll metabolism (ko00860)
gene_Bol016302	gene_Bol016302	--	26.8355	25.5893	27.2411	2.87327	4.556	3.0417	0.178831	0.87535	0	-3.21608	down	-3.07217	down	K15405|1.6e-293|bna:106353459|K15405 midchain alkane hydroxylase | (RefSeq) alkane hydroxylase MAH1-like	Cutin, suberine and wax biosynthesis (ko00073)
gene_Bol016437	gene_Bol016437	LOC106322072	49.7509	32.1748	27.4516	15.7437	13.8423	15.9218	5.79371	4.91323	4.1444	-1.55292	down	-1.21757	down	K05841|1.6e-20|mdm:103451122|K05841 sterol 3beta-glucosyltransferase [EC:2.4.1.173] | (RefSeq) sterol 3-beta-glucosyltransferase UGT80A2-like isoform X1	--
gene_Bol016439	gene_Bol016439	LOC106325818	15.1508	29.9339	24.9101	6.87516	5.35493	7.78768	0.82124	3.62666	1.03845	-2.10512	down	-1.49312	down	--	--
gene_Bol016563	gene_Bol016563	LOC106327060	2.56308	1.76834	1.88852	1.18087	1.23128	1.16716	0.167485	0.442582	0.110702	-1.08167	down	-1.92085	down	K15042|6.7e-269|boe:106327060|K15042 importin subunit alpha-6/7 | (RefSeq) importin subunit alpha-3-like isoform X1	--
gene_Bol016564	gene_Bol016564	LOC106381611	124.822	75.1547	56.367	5.81408	10.6578	8.60898	1.2375	3.37189	0.374951	-3.62851	down	-2.05087	down	K20893|3.3e-115|fve:101293494|K20893 probable galacturonosyltransferase-like 1 [EC:2.4.1.-] | (RefSeq) probable galacturonosyltransferase-like 1	--
gene_Bol016935	gene_Bol016935	BNAC09G33700D	40.2414	44.3198	31.9694	15.4051	17.0857	21.0646	6.34518	7.69864	2.17786	-1.41804	down	-1.39689	down	--	--
gene_Bol017002	gene_Bol017002	LOC106305779	4.12	3.2876	2.434	2.36815	1.35324	1.52317	0.382518	1.01215	0.465843	-1.20098	down	-1.08999	down	K22262|4.9e-100|qsu:112034235|K22262 WD repeat and FYVE domain-containing protein 3 | (RefSeq) protein SPIRRIG	--
gene_Bol017020	gene_Bol017020	--	126.599	174.677	202.909	69.3051	69.1112	98.1933	27.223	32.6497	3.39841	-1.40347	down	-1.64684	down	K01783|5.3e-156|boe:106306028|K01783 ribulose-phosphate 3-epimerase [EC:5.1.3.1] | (RefSeq) ribulose-phosphate 3-epimerase, chloroplastic	Pentose phosphate pathway (ko00030);; Pentose and glucuronate interconversions (ko00040);; Carbon fixation in photosynthetic organisms (ko00710);; Carbon metabolism (ko01200);; Biosynthesis of amino acids (ko01230)
gene_Bol017075	gene_Bol017075	LOC106306967	49.5006	97.7131	81.069	4.41289	2.86406	5.79016	0.920991	1.72866	0.598547	-4.44191	down	-1.63489	down	--	--
gene_Bol017080	gene_Bol017080	--	73.4994	149.2	138.954	18.7205	20.1665	26.3506	7.05241	9.17473	3.36176	-2.78373	down	-1.39693	down	--	--
gene_Bol017116	gene_Bol017116	LOC106306731	13.3439	12.3775	8.92815	8.72303	8.12816	6.82911	2.61955	5.10984	1.69275	-0.838112	down	-0.972074	down	--	--
gene_Bol017261	gene_Bol017261	BNAC09G35310D	3.87704	3.37718	2.72315	2.02404	1.51026	1.69752	0.877821	0.961327	0.688904	-1.21932	down	-0.652751	down	K03539|0.0e+00|bna:106416691|K03539 ribonuclease P/MRP protein subunit RPP1 [EC:3.1.26.5] | (RefSeq) uncharacterized protein BNAC09G35310D isoform X1	Ribosome biogenesis in eukaryotes (ko03008);; RNA transport (ko03013)
gene_Bol017274	gene_Bol017274	LOC106315823	11.2328	8.4891	8.01326	2.70411	3.26638	3.85477	1.45202	1.29503	0.417891	-1.78487	down	-1.29154	down	K09422|6.8e-113|boe:106315823|K09422 transcription factor MYB, plant | (RefSeq) transcription factor MYB59-like isoform X1	--
gene_Bol017380	gene_Bol017380	LOC106296670	24.5899	42.2282	33.0987	18.6418	14.7692	27.7414	11.7461	8.23385	2.27529	-1.0215	down	-1.15407	down	K08869|8.7e-22|cre:CHLREDRAFT_165812|K08869 aarF domain-containing kinase | (RefSeq) predicted protein	--
gene_Bol017432	gene_Bol017432	LOC106300203	89.756	46.8321	37.4863	20.8087	37.3904	30.1334	5.49114	3.92476	3.96579	-1.25387	down	-2.31765	down	K13947|3.9e-288|bna:106439727|K13947 auxin efflux carrier family protein | (RefSeq) auxin efflux carrier component 3-like	--
gene_Bol017433	gene_Bol017433	--	95.0623	48.6933	37.9556	24.15	36.3309	34.5164	3.50108	1.9566	0.775633	-1.21186	down	-3.57436	down	K13947|4.7e-43|bna:106353804|K13947 auxin efflux carrier family protein | (RefSeq) auxin efflux carrier component 3-like	--
gene_Bol017544	gene_Bol017544	LOC106331460	17.5054	35.5353	27.1856	3.84213	3.45548	4.07946	1.31923	1.22374	0.28024	-3.11895	down	-1.66058	down	K17686|2.6e-62|aly:9303246|K17686 P-type Cu+ transporter [EC:7.2.2.8] | (RefSeq) copper-transporting ATPase PAA1, chloroplastic isoform X1	MAPK signaling pathway - plant (ko04016)
gene_Bol017567	gene_Bol017567	LOC106339567	73.2491	74.6298	72.1811	27.4497	25.7797	33.634	16.6923	17.8702	8.53552	-1.64297	down	-0.651962	down	K19222|2.7e-09|ats:109782834|K19222 1,4-dihydroxy-2-naphthoyl-CoA hydrolase [EC:3.1.2.28] | (RefSeq) uncharacterized protein LOC109782834 isoform X1	Ubiquinone and other terpenoid-quinone biosynthesis (ko00130)
gene_Bol017617	gene_Bol017617	LOC103868027	125.058	84.4477	97.6527	31.7497	28.575	25.4745	7.46834	17.6765	4.89982	-2.13147	down	-1.18834	down	K07375|3.0e-262|bna:106451512|K07375 tubulin beta | (RefSeq) tubulin beta-7 chain	Phagosome (ko04145)
gene_Bol017638	gene_Bol017638	--	15.4328	12.1771	9.94345	2.20384	4.00381	3.11389	1.31447	1.16293	0.809757	-2.29221	down	-1.13036	down	K05761|0.0e+00|boe:106342978|K05761 villin 1 | (RefSeq) villin-1	--
gene_Bol017697	gene_Bol017697	LOC106306980	287.465	252.085	66.3502	8.12063	9.6781	8.93949	0.856767	3.14345	0.615365	-4.77665	down	-2.21612	down	--	--
gene_Bol017764	gene_Bol017764	LOC106339613	91.2328	245.51	184.322	59.9278	68.7587	86.5544	36.5054	23.7106	9.34868	-1.58887	down	-1.31503	down	K19033|1.4e-57|bna:106429318|K19033 30S ribosomal protein S31 | (RefSeq) 30S ribosomal protein S31, chloroplastic	--
gene_Bol017791	gene_Bol017791	LOC106406992	79.393	37.1657	22.4581	14.1355	15.9489	16.8837	8.33137	8.11481	3.66274	-1.83931	down	-0.875138	down	K14396|2.1e-107|boe:106342211|K14396 polyadenylate-binding protein 2 | (RefSeq) nucleolin 1-like isoform X1	mRNA surveillance pathway (ko03015)
gene_Bol017820	gene_Bol017820	--	285.995	161.75	174.6	4.1262	20.1106	15.2069	0.906075	6.28079	0.446828	-4.25634	down	-2.0942	down	--	--
gene_Bol017833	gene_Bol017833	LOC106341691	63.6783	46.6298	32.0202	10.5054	8.84218	13.4714	7.04894	4.28012	2.77199	-2.40694	down	-0.864175	down	K03453|4.8e-222|bna:106411211|K03453 bile acid:Na+ symporter, BASS family | (RefSeq) sodium/pyruvate cotransporter BASS2, chloroplastic-like	--
gene_Bol017856	gene_Bol017856	--	1.32558	2.66855	0.837415	0.391836	0.895561	1.01372	0.159181	0.128597	0	-1.36966	down	-2.73847	down	K09338|0.0e+00|bna:106365075|K09338 homeobox-leucine zipper protein | (RefSeq) homeobox-leucine zipper protein ATHB-8	--
gene_Bol017918	gene_Bol017918	LOC106401069	17.6949	14.3945	9.98923	9.66528	10.094	12.7603	3.06559	5.52996	0.896605	-0.662728	down	-1.48348	down	K21596|1.9e-11|sind:105176456|K21596 calmodulin-binding transcription activator | (RefSeq) protein WVD2-like 2 isoform X1	--
gene_Bol017921	gene_Bol017921	LOC106317436	5.55043	5.19079	2.66554	2.80014	2.16267	4.03215	0	0.513091	0	-0.872768	down	-3.887	down	K13416|2.4e-63|lang:109329894|K13416 brassinosteroid insensitive 1-associated receptor kinase 1 [EC:2.7.10.1 2.7.11.1] | (RefSeq) BRASSINOSTEROID INSENSITIVE 1-associated receptor kinase 1-like	MAPK signaling pathway - plant (ko04016);; Plant hormone signal transduction (ko04075);; Plant-pathogen interaction (ko04626)
gene_Bol017929	gene_Bol017929	LOC106339914	250.464	508.327	523.344	94.8095	100.999	119.989	66.0465	60.6691	32.5992	-2.33525	down	-0.633072	down	K02109|2.6e-86|bna:106399213|K02109 F-type H+-transporting ATPase subunit b | (RefSeq) ATP synthase subunit b', chloroplastic	Oxidative phosphorylation (ko00190);; Photosynthesis (ko00195)
gene_Bol017962	gene_Bol017962	--	15.7378	10.4975	9.01601	4.71387	3.27215	3.59886	1.2721	1.75652	0.952525	-1.89153	down	-1.14458	down	K00586|1.2e-155|bna:106375398|K00586 diphthine methyl ester synthase [EC:2.1.1.314] | (RefSeq) probable diphthine methyl ester synthase	--
gene_Bol018212	gene_Bol018212	LOC106420994	22.9256	47.3661	28.2505	10.2691	13.1287	15.9935	2.60232	4.31751	0.134721	-1.62902	down	-2.2461	down	K03545|1.1e-279|bna:106420994|K03545 trigger factor | (RefSeq) trigger factor-like protein TIG, Chloroplastic isoform X1	--
gene_Bol018246	gene_Bol018246	LOC106327201	224.668	201.766	366.626	44.5306	40.6744	49.2023	12.139	14.9065	4.77364	-2.87047	down	-1.75557	down	K03146|5.2e-193|bna:106366413|K03146 cysteine-dependent adenosine diphosphate thiazole synthase [EC:2.4.2.60] | (RefSeq) thiamine thiazole synthase, chloroplastic-like	Thiamine metabolism (ko00730)
gene_Bol018253	gene_Bol018253	LOC106380455	27.2583	56.4779	40.6266	7.27385	7.17877	12.1935	0.975365	1.32565	0.345509	-2.53517	down	-2.96226	down	K02895|3.7e-103|bna:106380455|K02895 large subunit ribosomal protein L24 | (RefSeq) 50S ribosomal protein L24, chloroplastic	Ribosome (ko03010)
gene_Bol018276	gene_Bol018276	LOC106308015	10.4279	29.1405	12.624	2.43359	1.51399	1.75116	0.704492	0.453786	0.441833	-3.49252	down	-1.37058	down	K02884|8.1e-115|bna:106402042|K02884 large subunit ribosomal protein L19 | (RefSeq) 50S ribosomal protein L19-1, chloroplastic-like	Ribosome (ko03010)
gene_Bol018309	gene_Bol018309	--	5.69115	5.59259	8.16187	2.80823	3.91118	4.42992	1.01764	1.53307	0.610555	-1.10726	down	-1.46387	down	K12164|2.0e-225|boe:106309571|K12164 ubiquitin-like modifier-activating enzyme 5 | (RefSeq) ubiquitin-like modifier-activating enzyme 5 isoform X1	--
gene_Bol018355	gene_Bol018355	LOC106406731	53.7629	33.0913	41.6154	6.11298	7.59956	5.76687	0	0.163503	0	-3.00572	down	-6.31106	down	K14484|2.4e-130|bna:106406731|K14484 auxin-responsive protein IAA | (RefSeq) auxin-responsive protein IAA17-like	Plant hormone signal transduction (ko04075)
gene_Bol018384	gene_Bol018384	LOC106307865	26.7356	38.3591	33.9178	20.5149	25.3481	33.5007	9.26127	13.8101	1.77917	-0.626933	down	-1.39977	down	K03671|9.4e-98|boe:106307865|K03671 thioredoxin 1 | (RefSeq) thioredoxin M-type, chloroplastic	--
gene_Bol018438	gene_Bol018438	--	23.5121	29.396	15.4801	9.88142	8.28975	16.7597	5.6987	4.47151	4.56683	-1.27341	down	-0.818626	down	--	--
gene_Bol018445	gene_Bol018445	--	54.3237	97.4737	72.1901	48.6355	63.2683	53.5953	16.1276	30.8838	12.4845	-0.738696	down	-1.12443	down	K00161|4.1e-245|boe:106311746|K00161 pyruvate dehydrogenase E1 component alpha subunit [EC:1.2.4.1] | (RefSeq) pyruvate dehydrogenase E1 component subunit alpha-3, chloroplastic	Glycolysis / Gluconeogenesis (ko00010);; Citrate cycle (TCA cycle) (ko00020);; Pyruvate metabolism (ko00620);; Carbon metabolism (ko01200)
gene_Bol018447	gene_Bol018447	--	146.126	86.4842	51.697	4.25904	3.92498	6.56126	0.30353	1.90403	0	-4.55147	down	-2.50946	down	K15397|3.6e-299|boe:106312287|K15397 3-ketoacyl-CoA synthase [EC:2.3.1.199] | (RefSeq) 3-ketoacyl-CoA synthase 1	Fatty acid elongation (ko00062);; Plant-pathogen interaction (ko04626)
gene_Bol018448	gene_Bol018448	LOC106312205	283.928	369.986	323.844	13.8171	14.8493	19.6018	1.40871	5.18476	0.522736	-4.64414	down	-2.4858	down	K07198|7.7e-133|dzi:111274966|K07198 5'-AMP-activated protein kinase, catalytic alpha subunit [EC:2.7.11.11] | (RefSeq) LOW QUALITY PROTEIN: CBL-interacting serine/threonine-protein kinase 20-like	--
gene_Bol018467	gene_Bol018467	LOC106377369	10.103	5.02562	2.65354	1.96532	4.63868	3.42399	0.428	0.762004	0	-1.0903	down	-2.83612	down	K01180|7.4e-75|cmax:111487562|K01180 endo-1,3(4)-beta-glucanase [EC:3.2.1.6] | (RefSeq) uncharacterized protein LOC111487562	--
gene_Bol018468	gene_Bol018468	LOC106377370	3.08386	5.94008	3.44163	2.90055	3.04639	2.19572	0.43544	0.82904	0.340491	-0.909607	down	-1.97642	down	K00521|0.0e+00|bna:106377370|K00521 ferric-chelate reductase [EC:1.16.1.7] | (RefSeq) ferric reduction oxidase 2-like	--
gene_Bol018471	gene_Bol018471	LOC106311526	43.816	34.0085	21.5948	3.7846	4.76117	5.34576	0.428845	1.12944	0.040969	-3.12536	down	-2.85268	down	K13508|7.5e-286|bna:106377375|K13508 glycerol-3-phosphate acyltransferase [EC:2.3.1.15 2.3.1.198] | (RefSeq) glycerol-3-phosphate 2-O-acyltransferase 4	Glycerolipid metabolism (ko00561);; Glycerophospholipid metabolism (ko00564)
gene_Bol018486	gene_Bol018486	LOC106425995	25.0017	18.6881	14.4143	14.3672	12.8261	15.3786	5.53674	9.42252	3.23692	-0.740641	down	-0.87663	down	K12734|1.4e-107|bna:106425995|K12734 peptidyl-prolyl cis-trans isomerase-like 3 [EC:5.2.1.8] | (RefSeq) peptidyl-prolyl cis-trans isomerase CYP18-1	--
gene_Bol018526	gene_Bol018526	LOC106306452	666.173	814.412	934.958	97.0316	112.686	100.89	4.44298	6.60543	4.38253	-3.26245	down	-3.92931	down	K01623|2.3e-221|boe:106306452|K01623 fructose-bisphosphate aldolase, class I [EC:4.1.2.13] | (RefSeq) probable fructose-bisphosphate aldolase 2, chloroplastic	Glycolysis / Gluconeogenesis (ko00010);; Pentose phosphate pathway (ko00030);; Fructose and mannose metabolism (ko00051);; Carbon fixation in photosynthetic organisms (ko00710);; Carbon metabolism (ko01200);; Biosynthesis of amino acids (ko01230)
gene_Bol018533	gene_Bol018533	LOC106410539	32.1014	27.7224	25.4963	9.19285	8.25887	6.54878	1.94114	2.99107	1.23967	-2.12091	down	-1.60711	down	K11498|0.0e+00|bna:106410539|K11498 centromeric protein E | (RefSeq) kinesin-like protein KIN-7D, mitochondrial	--
gene_Bol018592	gene_Bol018592	XET	88.4602	83.2473	52.1878	18.5226	12.3844	29.5374	0.149134	0.826942	0	-2.1904	down	-5.65936	down	K08235|1.1e-177|boe:106301578|K08235 xyloglucan:xyloglucosyl transferase [EC:2.4.1.207] | (RefSeq) probable xyloglucan endotransglucosylase/hydrolase protein 7	--
gene_Bol018603	gene_Bol018603	--	19.1725	15.4728	17.9256	13.4379	6.92334	10.5367	3.94433	3.60575	3.34451	-1.06437	down	-1.09096	down	K02935|1.4e-82|bna:106411404|K02935 large subunit ribosomal protein L7/L12 | (RefSeq) uncharacterized protein LOC106411404	Ribosome (ko03010)
gene_Bol018642	gene_Bol018642	LOC106301616	15.7753	15.1143	12.7035	2.59392	2.89187	5.56426	0.743135	0.728367	0.124904	-2.27732	down	-2.43567	down	K02716|6.2e-177|bna:106409758|K02716 photosystem II oxygen-evolving enhancer protein 1 | (RefSeq) oxygen-evolving enhancer protein 1, chloroplastic	Photosynthesis (ko00195)
gene_Bol018671	gene_Bol018671	LOC106411109	78.1959	50.5685	60.6366	14.9921	17.3643	20.2999	2.63376	4.89168	0	-2.13994	down	-2.58942	down	K00128|5.0e-279|bna:106411109|K00128 aldehyde dehydrogenase (NAD+) [EC:1.2.1.3] | (RefSeq) aldehyde dehydrogenase family 3 member F1	Glycolysis / Gluconeogenesis (ko00010);; Ascorbate and aldarate metabolism (ko00053);; Fatty acid degradation (ko00071);; Valine, leucine and isoleucine degradation (ko00280);; Lysine degradation (ko00310);; Arginine and proline metabolism (ko00330);; Histidine metabolism (ko00340);; Tryptophan metabolism (ko00380);; beta-Alanine metabolism (ko00410);; Glycerolipid metabolism (ko00561);; Pyruvate…
gene_Bol018709	gene_Bol018709	LOC106303783	30.3258	19.4219	26.9461	20.564	16.2316	17.9202	10.7807	10.8098	3.55863	-0.782775	down	-0.796011	down	K02867|3.3e-83|bna:111207412|K02867 large subunit ribosomal protein L11 | (RefSeq) 54S ribosomal protein L19, mitochondrial-like	Ribosome (ko03010)
gene_Bol018715	gene_Bol018715	LOC111207874	83.5266	40.0501	39.737	29.2953	20.6018	25.7234	5.93033	9.76214	0.825012	-1.3967	down	-1.93721	down	K13412|1.3e-280|bna:111207874|K13412 calcium-dependent protein kinase [EC:2.7.11.1] | (RefSeq) calcium-dependent protein kinase 5-like	Plant-pathogen interaction (ko04626)
gene_Bol018757	gene_Bol018757	LOC106310518	81.4344	142.409	130.372	14.9622	16.0503	29.4293	5.06682	6.07465	3.41798	-2.86622	down	-1.67656	down	--	--
gene_Bol018784	gene_Bol018784	--	52.7836	18.0105	24.9258	2.9478	5.43552	2.72845	0.739036	0.66631	1.26686	-3.36831	down	-1.55414	down	--	--
gene_Bol018848	gene_Bol018848	LOC106307005	5.94571	2.98593	4.06017	1.69703	1.5895	2.83627	0.989346	0.902502	0.230542	-1.37925	down	-1.18268	down	K00609|5.0e-213|bna:106397664|K00609 aspartate carbamoyltransferase catalytic subunit [EC:2.1.3.2] | (RefSeq) aspartate carbamoyltransferase, chloroplastic-like	Pyrimidine metabolism (ko00240);; Alanine, aspartate and glutamate metabolism (ko00250)
gene_Bol018868	gene_Bol018868	LOC106318381	127.503	63.3213	59.1059	33.7165	37.5529	36.9825	7.86993	14.8759	1.80056	-1.48812	down	-1.87406	down	K14494|0.0e+00|boe:106318381|K14494 DELLA protein | (RefSeq) DELLA protein RGA2 isoform X1	Plant hormone signal transduction (ko04075)
gene_Bol018886	gene_Bol018886	LOC106313729	44.1314	88.7587	61.5445	18.382	15.1965	29.1126	8.25706	7.62594	0.912306	-1.94533	down	-1.6236	down	K02961|1.9e-72|boe:106313729|K02961 small subunit ribosomal protein S17 | (RefSeq) 30S ribosomal protein S17, chloroplastic-like	Ribosome (ko03010)
gene_Bol018902	gene_Bol018902	--	60.7061	44.6055	54.8582	14.6905	11.4015	13.3332	5.95897	7.9952	3.00244	-2.32086	down	-0.874509	down	K22763|1.2e-39|lja:Lj2g3v1989220.3|K22763 deubiquitinase DESI2 [EC:3.4.19.12] | (RefSeq) Lj2g3v1989220.3; -	--
gene_Bol018927	gene_Bol018927	LOC103839541	40.239	77.9466	53.7282	26.3763	27.9588	35.0321	6.80902	11.5762	2.1381	-1.25222	down	-1.8285	down	K02884|4.9e-109|brp:103839541|K02884 large subunit ribosomal protein L19 | (RefSeq) 50S ribosomal protein L19-2, chloroplastic	Ribosome (ko03010)
gene_Bol018931	gene_Bol018931	LOC106317619	68.874	76.701	97.8539	12.1787	15.8306	17.4947	1.72615	2.54808	0.879478	-2.72447	down	-2.78874	down	--	--
gene_Bol019217	gene_Bol019217	LOC106313020	22.1892	30.8632	29.8958	4.77532	2.1812	4.65273	0.291076	1.42887	0.28945	-3.14614	down	-2.17681	down	--	--
gene_Bol019249	gene_Bol019249	--	55.1766	45.812	35.7158	16.3888	24.0917	17.5851	6.13858	6.18816	7.24747	-1.5203	down	-1.12123	down	K19791|6.4e-229|adu:107487768|K19791 iron transport multicopper oxidase | (RefSeq) L-ascorbate oxidase homolog	--
gene_Bol019273	gene_Bol019273	LOC106357671	832.448	1089.76	1083.86	95.67	99.1508	145.959	18.9324	26.196	3.55743	-3.4498	down	-2.53751	down	K02716|3.2e-184|bna:106357671|K02716 photosystem II oxygen-evolving enhancer protein 1 | (RefSeq) oxygen-evolving enhancer protein 1-1, chloroplastic-like isoform X2	Photosynthesis (ko00195)
gene_Bol019293	gene_Bol019293	--	260.186	448.211	420.43	84.8773	95.4431	112.537	33.5527	36.1234	20.6697	-2.2562	down	-1.32811	down	K02641|7.7e-208|bna:106392251|K02641 ferredoxin--NADP+ reductase [EC:1.18.1.2] | (RefSeq) ferredoxin--NADP reductase, leaf isozyme 1, chloroplastic	Photosynthesis (ko00195)
gene_Bol019313	gene_Bol019313	--	784.235	714.935	249.177	86.8234	176.907	36.9086	0.410736	2.46764	0.450738	-2.80204	down	-6.16833	down	--	--
gene_Bol019353	gene_Bol019353	--	32.4025	38.0106	34.7564	26.2765	24.1071	27.2671	13.5625	11.201	2.38699	-0.740012	down	-1.23411	down	--	--
gene_Bol019427	gene_Bol019427	LOC106331547	4.87321	5.36679	3.91796	1.40088	3.08702	2.474	0.579037	0.469379	0.285691	-1.30332	down	-1.95169	down	--	--
gene_Bol019439	gene_Bol019439	LOC104711158	118.613	75.6727	86.0243	13.5529	11.1543	20.8232	2.45663	7.55964	0.308005	-2.92094	down	-1.89668	down	K07375|4.0e-262|bna:106347558|K07375 tubulin beta | (RefSeq) tubulin beta-2 chain	Phagosome (ko04145)
gene_Bol019452	gene_Bol019452	LOC106296811	56.7096	83.185	90.2057	51.1516	60.1646	75.3338	19.1687	19.719	5.01998	-0.612238	down	-1.78983	down	--	--
gene_Bol019477	gene_Bol019477	LOC106405528	115.876	297.793	191.062	30.3574	33.5842	63.0738	12.842	20.0024	2.0637	-2.56647	down	-1.59596	down	K02695|1.1e-75|bna:106405528|K02695 photosystem I subunit VI | (RefSeq) photosystem I reaction center subunit VI, chloroplastic-like	Photosynthesis (ko00195)
gene_Bol019637	gene_Bol019637	LOC106375575	409.22	764.93	586.463	39.4991	47.9111	67.6254	17.6405	18.3589	5.85403	-3.81498	down	-1.57115	down	K02693|4.3e-61|bna:106375575|K02693 photosystem I subunit IV | (RefSeq) photosystem I reaction center subunit IV A, chloroplastic	Photosynthesis (ko00195)
gene_Bol019650	gene_Bol019650	LOC111206443	6.21146	3.41067	5.77489	0.991402	1.44314	1.33921	0.186858	0.499936	0.342868	-2.30406	down	-1.4151	down	K05663|3.3e-88|obr:102720500|K05663 ATP-binding cassette, subfamily B, mitochondrial transporter ATM | (RefSeq) ABC transporter B family member 25, mitochondrial	ABC transporters (ko02010)
gene_Bol019771	gene_Bol019771	--	3.79778	7.76787	7.05953	0.875181	1.92108	1.70865	0.784542	0.478124	0.377642	-2.34764	down	-1.07105	down	K13754|4.5e-305|bna:106426099|K13754 solute carrier family 24 (sodium/potassium/calcium exchanger), member 6 | (RefSeq) cation/calcium exchanger 2-like	--
gene_Bol019785	gene_Bol019785	LOC106319346	2.26054	2.37632	1.76072	1.48059	1.46859	1.42889	0.260719	0.42167	0	-0.841328	down	-2.39922	down	K03439|4.9e-160|boe:106319346|K03439 tRNA (guanine-N7-)-methyltransferase [EC:2.1.1.33] | (RefSeq) tRNA (guanine-N(7)-)-methyltransferase	--
gene_Bol019788	gene_Bol019788	LOC106318264	21.6125	20.1222	18.0011	6.94471	8.39593	10.2975	4.16951	5.77466	1.9432	-1.51646	down	-0.775258	down	K15283|1.4e-221|bna:106426182|K15283 solute carrier family 35, member E1 | (RefSeq) xylulose 5-phosphate/phosphate translocator, chloroplastic	--
gene_Bol019795	gene_Bol019795	--	4.38721	3.21697	3.25128	1.66312	2.02593	2.85461	0.054533	0.290703	0.146341	-1.02884	down	-3.32406	down	--	--
gene_Bol019851	gene_Bol019851	LOC106318312	28.1308	27.8015	28.5028	6.30533	5.29045	4.62074	2.30909	1.24743	1.50064	-2.67746	down	-1.26592	down	K12811|1.3e-32|bna:106427234|K12811 ATP-dependent RNA helicase DDX46/PRP5 [EC:3.6.4.13] | (RefSeq) uncharacterized protein LOC106427234	Spliceosome (ko03040)
gene_Bol019853	gene_Bol019853	LOC106318991	15.6471	16.2689	16.7959	9.3671	7.81415	9.93833	2.96564	3.06343	0.40421	-1.14902	down	-1.80643	down	K01873|0.0e+00|bna:106387684|K01873 valyl-tRNA synthetase [EC:6.1.1.9] | (RefSeq) valine--tRNA ligase, chloroplastic/mitochondrial 2	Aminoacyl-tRNA biosynthesis (ko00970)
gene_Bol019884	gene_Bol019884	--	23.6948	23.0261	21.3765	1.46273	2.8614	4.01294	0.644541	0.962789	0.885543	-3.31895	down	-1.29017	down	K16226|1.0e-19|eus:EUTSA_v10000750mg|K16226 disease resistance protein RPS4 | (RefSeq) hypothetical protein	Plant-pathogen interaction (ko04626)
gene_Bol020096	gene_Bol020096	LOC106321164	68.3261	47.0961	56.1631	16.8785	19.0295	27.8007	3.80096	5.50027	0.662326	-1.72723	down	-2.39635	down	--	--
gene_Bol020153	gene_Bol020153	--	9.77685	12.4799	12.2166	7.86734	8.86296	5.89498	2.76905	4.93027	2.42033	-0.902627	down	-0.78744	down	K06268|5.3e-116|bna:106381879|K06268 serine/threonine-protein phosphatase 2B regulatory subunit | (RefSeq) calcineurin B-like protein 9 isoform X1	--
gene_Bol020321	gene_Bol020321	--	50.4155	55.2247	29.5356	30.2199	30.1304	24.277	6.28536	17.7097	2.27447	-0.964412	down	-1.41603	down	K01962|0.0e+00|boe:106335287|K01962 acetyl-CoA carboxylase carboxyl transferase subunit alpha [EC:6.4.1.2 2.1.3.15] | (RefSeq) acetyl-coenzyme A carboxylase carboxyl transferase subunit alpha, chloroplastic	Fatty acid biosynthesis (ko00061);; Pyruvate metabolism (ko00620);; Propanoate metabolism (ko00640);; Carbon metabolism (ko01200);; Fatty acid metabolism (ko01212)
gene_Bol020407	gene_Bol020407	LOC106335604	15.2715	16.4539	13.1087	4.29154	4.54531	5.76503	1.97691	2.98101	1.6927	-1.9156	down	-0.749494	down	--	--
gene_Bol020410	gene_Bol020410	LOC106334647	13.4987	15.8026	14.0764	6.53239	5.24777	8.00123	2.42011	2.21787	0.485175	-1.43776	down	-1.65459	down	K08869|0.0e+00|boe:106334647|K08869 aarF domain-containing kinase | (RefSeq) uncharacterized protein sll0005	--
gene_Bol020415	gene_Bol020415	--	19.5133	12.3874	22.2497	5.20862	3.09344	4.70675	0.467531	2.02296	1.29112	-2.36235	down	-1.33135	down	--	--
gene_Bol020434	gene_Bol020434	--	1600.16	3062.81	3062.22	38.4203	60.7399	59.444	17.4646	15.2671	3.68555	-5.91489	down	-1.83877	down	K09753|9.1e-07|dosa:Os09t0262000-00|K09753 cinnamoyl-CoA reductase [EC:1.2.1.44] | (RefSeq) Os09g0262000; Similar to Cinnamoyl CoA reductase.	Phenylpropanoid biosynthesis (ko00940)
gene_Bol020482	gene_Bol020482	LOC106328415	6.00382	8.05012	9.49833	1.59633	1.60735	1.86768	0.873026	0.794263	0.238785	-2.51936	down	-1.08315	down	K15449|5.9e-133|nto:104090695|K15449 tRNA wybutosine-synthesizing protein 1 [EC:4.1.3.44] | (RefSeq) uncharacterized protein LOC104090695	--
gene_Bol020534	gene_Bol020534	--	83.6003	78.9088	68.8106	46.2741	53.9477	67.0879	17.7688	22.9256	5.43708	-0.764882	down	-1.55953	down	K02981|1.7e-133|bna:106388267|K02981 small subunit ribosomal protein S2e | (RefSeq) 40S ribosomal protein S2-2	Ribosome (ko03010)
gene_Bol020536	gene_Bol020536	LOC106334993	22.2419	24.183	21.594	9.60359	10.8168	8.95926	5.96732	5.71105	1.90466	-1.50716	down	-0.798763	down	--	--
gene_Bol020552	gene_Bol020552	--	227.817	233.347	256.201	27.4853	16.416	66.3202	7.90095	5.63624	0	-3.01856	down	-2.77635	down	--	--
gene_Bol020585	gene_Bol020585	LOC106335822	27.9392	30.6191	28.2306	11.0933	13.0784	11.5196	6.10115	6.72751	2.20842	-1.57814	down	-0.927287	down	K09754|4.4e-302|boe:106335822|K09754 5-O-(4-coumaroyl)-D-quinate 3'-monooxygenase [EC:1.14.14.96] | (RefSeq) cytochrome P450 98A3	Phenylpropanoid biosynthesis (ko00940);; Flavonoid biosynthesis (ko00941);; Stilbenoid, diarylheptanoid and gingerol biosynthesis (ko00945)
gene_Bol020636	gene_Bol020636	LOC106324639	15.0848	32.7288	9.94347	8.70206	10.5986	7.19926	2.29074	1.50924	0.043157	-1.41645	down	-2.54967	down	K16297|1.5e-305|boe:106324639|K16297 serine carboxypeptidase-like clade II [EC:3.4.16.-] | (RefSeq) serine carboxypeptidase-like 34	--
gene_Bol020853	gene_Bol020853	LOC106327529	68.0885	305.585	271.658	13.6775	9.41548	9.77073	3.41763	3.88465	1.71336	-4.61475	down	-1.49961	down	K08916|3.5e-160|boe:106327529|K08916 light-harvesting complex II chlorophyll a/b binding protein 5 | (RefSeq) chlorophyll a-b binding protein CP26, chloroplastic-like	Photosynthesis - antenna proteins (ko00196)
gene_Bol020900	gene_Bol020900	LOC106294456	50.6545	136.277	139.146	16.6139	12.7027	16.3634	1.33632	3.35876	1.09841	-3.15166	down	-2.60148	down	K02437|4.8e-88|boe:106294456|K02437 glycine cleavage system H protein | (RefSeq) glycine cleavage system H protein 3, mitochondrial	Glycine, serine and threonine metabolism (ko00260);; Glyoxylate and dicarboxylate metabolism (ko00630);; Carbon metabolism (ko01200)
gene_Bol020992	gene_Bol020992	LOC106322830	5.44464	5.1901	3.27108	1.47421	2.4055	3.65525	0.816758	0.742641	0.460754	-1.17253	down	-1.51633	down	K00901|1.6e-293|boe:106322830|K00901 diacylglycerol kinase (ATP) [EC:2.7.1.107] | (RefSeq) diacylglycerol kinase 7	Glycerolipid metabolism (ko00561);; Glycerophospholipid metabolism (ko00564);; Phosphatidylinositol signaling system (ko04070)
gene_Bol021078	gene_Bol021078	LOC106312737	2.70923	1.71037	2.90909	1.76958	1.78079	1.90335	0.978151	0.938661	0.45632	-0.72357	down	-0.842398	down	K22911|2.7e-141|spen:107031166|K22911 thiamine phosphate phosphatase / amino-HMP aminohydrolase [EC:3.1.3.100 3.5.99.-] | (RefSeq) bifunctional TH2 protein, mitochondrial	Thiamine metabolism (ko00730)
gene_Bol021119	gene_Bol021119	--	1044.89	1653.13	1419.54	209.8	229.495	309.42	72.0067	86.4168	15.5986	-2.76797	down	-1.82513	down	K02693|1.6e-60|bna:106361185|K02693 photosystem I subunit IV | (RefSeq) photosystem I reaction center subunit IV A, chloroplastic	Photosynthesis (ko00195)
gene_Bol021120	gene_Bol021120	--	4.09957	7.76353	6.77242	3.0893	2.00393	2.68791	0.849005	0.535335	0.453225	-1.57547	down	-1.57266	down	K03676|4.0e-88|bna:106415370|K03676 glutaredoxin 3 | (RefSeq) glutaredoxin-C5, chloroplastic	--
gene_Bol021169	gene_Bol021169	LOC106414343	34.9602	23.0955	10.4977	0.795698	1.52049	0.99634	0	0.124602	0	-4.6359	down	-4.47298	down	--	--
gene_Bol021222	gene_Bol021222	LOC103846432	80.5538	80.3178	51.3771	41.6303	51.6199	54.7911	17.9816	20.8958	2.67936	-0.811857	down	-1.56655	down	K02997|4.2e-107|bna:106367186|K02997 small subunit ribosomal protein S9e | (RefSeq) 40S ribosomal protein S9-1	Ribosome (ko03010)
gene_Bol021269	gene_Bol021269	LOC103851029	39.6044	38.841	27.8848	19.8404	21.3747	20.6396	8.46357	9.9132	1.11497	-1.07349	down	-1.39602	down	K02993|1.3e-100|bna:106354467|K02993 small subunit ribosomal protein S7e | (RefSeq) 40S ribosomal protein S7-3-like	Ribosome (ko03010)
gene_Bol021283	gene_Bol021283	LOC106322469	43.1685	57.1992	38.6103	28.4327	29.3802	31.0868	7.97282	9.89027	3.31691	-0.943109	down	-1.73904	down	K02160|3.8e-130|boe:106322469|K02160 acetyl-CoA carboxylase biotin carboxyl carrier protein | (RefSeq) biotin carboxyl carrier protein of acetyl-CoA carboxylase 1, chloroplastic	Fatty acid biosynthesis (ko00061);; Pyruvate metabolism (ko00620);; Propanoate metabolism (ko00640);; Carbon metabolism (ko01200);; Fatty acid metabolism (ko01212)
gene_Bol021320	gene_Bol021320	--	61.8814	120.918	133.741	5.3166	8.85516	9.67891	2.23323	0.986881	0	-4.04032	down	-2.65237	down	K00366|2.6e-06|ota:OT_ostta10g00930|K00366 ferredoxin-nitrite reductase [EC:1.7.7.1] | (RefSeq) Riboflavin synthase-like beta-barrel	Nitrogen metabolism (ko00910)
gene_Bol021416	gene_Bol021416	--	6.19848	6.23236	3.4576	2.09327	1.98702	1.67715	0.423485	0.058984	0.108214	-1.74965	down	-2.86944	down	--	--
gene_Bol021502	gene_Bol021502	LOC106405638	6.30561	10.2406	8.33683	3.15004	3.36957	4.10915	0.713675	1.41245	0.406249	-1.53272	down	-1.73434	down	K03798|0.0e+00|bna:106405638|K03798 cell division protease FtsH [EC:3.4.24.-] | (RefSeq) ATP-dependent zinc metalloprotease FTSH 12, chloroplastic	--
gene_Bol021507	gene_Bol021507	--	4.6416	5.59091	4.09409	2.41155	4.66134	3.22709	0.358103	1.3059	0	-0.762408	down	-2.37972	down	K01627|5.2e-159|bna:106353402|K01627 2-dehydro-3-deoxyphosphooctonate aldolase (KDO 8-P synthase) [EC:2.5.1.55] | (RefSeq) 2-dehydro-3-deoxyphosphooctonate aldolase 1	--
gene_Bol021515	gene_Bol021515	--	16.3718	12.0378	10.5758	3.94578	3.97371	8.08508	2.60977	2.73976	0.778223	-1.57976	down	-1.06156	down	K16280|7.0e-212|boe:106300936|K16280 E3 ubiquitin-protein ligase RGLG [EC:2.3.2.27] | (RefSeq) E3 ubiquitin-protein ligase RGLG2-like	--
gene_Bol021533	gene_Bol021533	--	1382.8	1646.09	1675.19	372.748	411.958	615.691	130.273	147.936	28.9804	-2.05573	down	-1.90548	down	K03541|1.2e-71|bna:106405791|K03541 photosystem II 10kDa protein | (RefSeq) photosystem II 10 kDa polypeptide, chloroplastic	Photosynthesis (ko00195)
gene_Bol021558	gene_Bol021558	LOC106381012	65.1962	83.7628	86.9856	27.0626	25.1409	36.5229	5.25956	19.3735	1.5918	-1.7192	down	-1.49607	down	K00799|4.1e-124|bna:106381012|K00799 glutathione S-transferase [EC:2.5.1.18] | (RefSeq) glutathione S-transferase U20	Glutathione metabolism (ko00480)
gene_Bol021575	gene_Bol021575	--	14.2963	16.002	15.6066	11.2137	8.24848	13.5577	4.12685	5.1479	3.89803	-0.77902	down	-0.911707	down	--	--
gene_Bol021624	gene_Bol021624	LOC106337573	27.7133	50.0511	55.6699	7.2723	10.8671	12.8528	0.751048	1.32541	2.81267	-2.4153	down	-2.09882	down	K01802|1.0e-114|boe:106337573|K01802 peptidylprolyl isomerase [EC:5.2.1.8] | (RefSeq) peptidyl-prolyl cis-trans isomerase FKBP16-3, chloroplastic	--
gene_Bol021644	gene_Bol021644	LOC106391818	20.6975	72.6702	27.9389	10.0458	14.3129	14.8108	1.16139	2.36432	0.658329	-1.93578	down	-2.8872	down	K01738|3.8e-213|bna:106391818|K01738 cysteine synthase [EC:2.5.1.47] | (RefSeq) cysteine synthase, chloroplastic/chromoplastic	Cysteine and methionine metabolism (ko00270);; Sulfur metabolism (ko00920);; Carbon metabolism (ko01200);; Biosynthesis of amino acids (ko01230)
gene_Bol021652	gene_Bol021652	--	2507.89	1898.72	2192.26	173.629	193.683	122.504	20.5677	81.3057	3.67429	-4.04126	down	-1.98352	down	K21552|1.4e-130|boe:106342346|K21552 methyl halide transferase [EC:2.1.1.165] | (RefSeq) probable thiocyanate methyltransferase 2	--
gene_Bol021664	gene_Bol021664	LOC106391809	18.3895	24.4168	17.2146	11.5557	18.6329	10.2316	4.58236	5.35527	0.818264	-0.859287	down	-1.64085	down	K02937|1.2e-132|bna:106391809|K02937 large subunit ribosomal protein L7e | (RefSeq) 60S ribosomal protein L7-3-like	Ribosome (ko03010)
gene_Bol021776	gene_Bol021776	LOC106340294	5.68863	4.76981	6.6064	3.32933	1.78579	2.86189	0	0.132853	0	-1.39167	down	-5.35134	down	K10664|3.8e-13|aly:9315596|K10664 E3 ubiquitin-protein ligase ATL6/9/15/31/42/55 [EC:2.3.2.27] | (RefSeq) RING-H2 finger protein ATL38	--
gene_Bol021803	gene_Bol021803	--	10.7714	7.52797	3.97591	4.0182	3.77414	4.961	1.24176	2.21291	0.462498	-1.09123	down	-1.3838	down	K12128|1.0e-244|bna:106391972|K12128 pseudo-response regulator 9 | (RefSeq) two-component response regulator-like APRR9 isoform X1	Circadian rhythm - plant (ko04712)
gene_Bol021806	gene_Bol021806	LOC106336849	196.373	288.817	288.635	8.61157	14.1341	12.2029	1.30466	2.32799	0.201656	-4.7694	down	-2.89461	down	K01092|1.1e-10|boe:106307850|K01092 myo-inositol-1(or 4)-monophosphatase [EC:3.1.3.25] | (RefSeq) phosphatase IMPL1, chloroplastic-like isoform X1	Inositol phosphate metabolism (ko00562);; Phosphatidylinositol signaling system (ko04070)
gene_Bol021878	gene_Bol021878	LOC106307354	72.9363	147.682	81.123	27.4828	15.3166	23.0224	5.45383	8.13649	1.9823	-2.50435	down	-1.75942	down	K02881|3.6e-91|bna:106360544|K02881 large subunit ribosomal protein L18 | (RefSeq) 50S ribosomal protein L18, chloroplastic	Ribosome (ko03010)
gene_Bol021886	gene_Bol021886	LOC106423708	1.59083	1.00825	1.17493	1.05289	0.650388	0.697819	0.358315	0.230372	0.050256	-0.937518	down	-1.55507	down	K00863|0.0e+00|boe:106311598|K00863 triose/dihydroxyacetone kinase / FAD-AMP lyase (cyclizing) [EC:2.7.1.28 2.7.1.29 4.6.1.15] | (RefSeq) putative 3,4-dihydroxy-2-butanone kinase isoform X1	Fructose and mannose metabolism (ko00051);; Glycerolipid metabolism (ko00561);; Carbon metabolism (ko01200)
gene_Bol021919	gene_Bol021919	--	1.18684	2.88462	1.60714	0.454869	0.876184	1.2067	0.403388	0.030503	0.099538	-1.46632	down	-1.86119	down	K03549|0.0e+00|bna:106419519|K03549 KUP system potassium uptake protein | (RefSeq) potassium transporter 9	--
gene_Bol021925	gene_Bol021925	LOC106311292	37.126	45.4056	28.2669	19.8037	22.0523	29.6137	11.0693	14.3758	2.98281	-0.931927	down	-1.03434	down	K02873|3.6e-109|boe:106311292|K02873 large subunit ribosomal protein L13e | (RefSeq) 60S ribosomal protein L13-2-like	Ribosome (ko03010)
gene_Bol021951	gene_Bol021951	--	26.1361	16.8187	10.0106	7.4477	6.99787	7.82782	5.53193	3.47779	2.08778	-1.53146	down	-0.657892	down	K11699|0.0e+00|bna:106360573|K11699 RNA-dependent RNA polymerase [EC:2.7.7.48] | (RefSeq) RNA-dependent RNA polymerase 6	--
gene_Bol021980	gene_Bol021980	LOC103827745	69.0545	71.5702	52.4985	39.9879	39.65	48.8351	18.2028	23.3519	3.66983	-0.88472	down	-1.22914	down	K02898|2.9e-73|bna:106390881|K02898 large subunit ribosomal protein L26e | (RefSeq) 60S ribosomal protein L26-1	Ribosome (ko03010)
gene_Bol022132	gene_Bol022132	LOC106311552	102.416	98.6947	82.7212	22.7173	51.6451	42.5245	0.426973	8.11133	0.177029	-1.56899	down	-3.5101	down	--	--
gene_Bol022189	gene_Bol022189	LOC106343563	71.485	158.887	110.315	15.5375	17.4015	20.2013	3.70284	4.06104	1.17537	-2.98763	down	-2.24422	down	K02867|1.3e-112|boe:106343563|K02867 large subunit ribosomal protein L11 | (RefSeq) 50S ribosomal protein L11, chloroplastic	Ribosome (ko03010)
gene_Bol022267	gene_Bol022267	LOC106295693	140.595	243.786	242.02	1.94616	1.61147	2.3648	0.577152	0.374132	0.325543	-7.02842	down	-1.82057	down	K00855|3.7e-219|boe:106295693|K00855 phosphoribulokinase [EC:2.7.1.19] | (RefSeq) phosphoribulokinase, chloroplastic-like	Carbon fixation in photosynthetic organisms (ko00710);; Carbon metabolism (ko01200)
gene_Bol022335	gene_Bol022335	LOC106410612	298.739	203.327	221.527	21.0644	19.944	50.6604	0.578803	9.87872	0.121054	-3.28452	down	-2.88609	down	K12472|6.4e-27|bvg:104885038|K12472 epidermal growth factor receptor substrate 15 | (RefSeq) filaggrin-like	Endocytosis (ko04144)
gene_Bol022352	gene_Bol022352	LOC106306022	58.6925	35.8635	27.0987	13.6813	16.1775	20.0934	0.587238	1.36729	0.162598	-1.56852	down	-4.22113	down	K03097|2.3e-10|aip:107623262|K03097 casein kinase II subunit alpha [EC:2.7.11.1] | (RefSeq) casein kinase II subunit alpha-like isoform X2	Ribosome biogenesis in eukaryotes (ko03008);; Circadian rhythm - plant (ko04712)
gene_Bol022384	gene_Bol022384	--	269.673	321.622	254.782	120.094	131.043	109.66	59.9996	73.4235	15.0187	-1.52559	down	-0.998886	down	K12135|8.0e-25|thj:104802991|K12135 zinc finger protein CONSTANS | (RefSeq) zinc finger protein CONSTANS-LIKE 2-like	Circadian rhythm - plant (ko04712)
gene_Bol022411	gene_Bol022411	--	6.99685	3.45762	2.72211	2.36697	1.30381	2.66435	0.862321	0.979139	0.359798	-1.33395	down	-1.14173	down	K12173|4.5e-38|gmx:100794341|K12173 BRCA1-A complex subunit BRE | (RefSeq) BRISC and BRCA1-A complex member 2	Homologous recombination (ko03440)
gene_Bol022501	gene_Bol022501	LOC106294367	232.959	635.973	328.488	50.2036	47.1803	52.9537	18.3416	16.2458	5.58845	-3.30139	down	-1.58715	down	K08912|3.1e-153|boe:106294367|K08912 light-harvesting complex II chlorophyll a/b binding protein 1 | (RefSeq) chlorophyll a-b binding protein 1, chloroplastic-like	Photosynthesis - antenna proteins (ko00196)
gene_Bol022526	gene_Bol022526	LOC106294868	28.9839	18.4304	36.3986	3.86052	2.90038	2.71274	0.780526	0.963905	0.22224	-3.44307	down	-1.91801	down	--	--
gene_Bol022561	gene_Bol022561	LOC106410522	26.3637	47.5817	29.73	13.6723	16.3755	10.2715	3.50077	5.34946	0.864132	-1.65865	down	-1.77452	down	K03453|1.7e-08|han:110873038|K03453 bile acid:Na+ symporter, BASS family | (RefSeq) probable sodium/metabolite cotransporter BASS3, chloroplastic	--
gene_Bol022726	gene_Bol022726	LOC106382434	127.071	96.2495	95.7819	61.5927	62.7142	59.9084	22.0548	38.8243	23.925	-1.08455	down	-0.721072	down	K11279|3.6e-101|bna:106382434|K11279 nucleosome assembly protein 1-like 1 | (RefSeq) nucleosome assembly protein 1;2 isoform X1	--
gene_Bol022802	gene_Bol022802	--	117.157	196.951	236.101	35.6331	40.69	73.6144	9.3149	32.8831	4.78374	-2.19456	down	-1.38783	down	K15283|1.6e-219|boe:106327756|K15283 solute carrier family 35, member E1 | (RefSeq) triose phosphate/phosphate translocator, chloroplastic isoform X1	--
gene_Bol022840	gene_Bol022840	--	28.5503	36.0484	16.122	13.5027	17.4049	26.2487	11.3565	6.40637	2.13544	-0.794249	down	-1.21903	down	K00901|2.7e-07|pavi:110754890|K00901 diacylglycerol kinase (ATP) [EC:2.7.1.107] | (RefSeq) uncharacterized protein LOC110754890	Glycerolipid metabolism (ko00561);; Glycerophospholipid metabolism (ko00564);; Phosphatidylinositol signaling system (ko04070)
gene_Bol022847	gene_Bol022847	--	6.81414	21.2823	10.6469	8.1589	1.28946	5.49286	1.39464	0.208478	0	-1.69714	down	-2.96401	down	K01728|3.7e-35|zju:107419134|K01728 pectate lyase [EC:4.2.2.2] | (RefSeq) pectate lyase 1-like	Pentose and glucuronate interconversions (ko00040)
gene_Bol022855	gene_Bol022855	--	13.1676	17.9216	7.80864	9.72473	6.00223	8.32463	0.590531	1.06374	0	-0.9921	down	-3.63011	down	K20989|0.0e+00|boe:106327330|K20989 urea-proton symporter | (RefSeq) urea-proton symporter DUR3	--
gene_Bol022969	gene_Bol022969	LOC106358152	10.9437	9.40626	10.2169	6.86818	5.3595	6.94409	0.241312	1.75103	0	-0.972581	down	-3.03991	down	K01213|3.2e-22|mus:103978198|K01213 galacturan 1,4-alpha-galacturonidase [EC:3.2.1.67] | (RefSeq) probable polygalacturonase At1g80170 isoform X1	Pentose and glucuronate interconversions (ko00040)
gene_Bol022977	gene_Bol022977	LOC108856313	2151.63	1302.17	1289.69	905.243	1004.74	1086.22	215.058	363.973	81.3578	-0.950842	down	-1.88423	down	K00128|3.0e-45|ccav:112512809|K00128 aldehyde dehydrogenase (NAD+) [EC:1.2.1.3] | (RefSeq) aldehyde dehydrogenase 5, mitochondrial-like	Glycolysis / Gluconeogenesis (ko00010);; Ascorbate and aldarate metabolism (ko00053);; Fatty acid degradation (ko00071);; Valine, leucine and isoleucine degradation (ko00280);; Lysine degradation (ko00310);; Arginine and proline metabolism (ko00330);; Histidine metabolism (ko00340);; Tryptophan metabolism (ko00380);; beta-Alanine metabolism (ko00410);; Glycerolipid metabolism (ko00561);; Pyruvate…
gene_Bol022979	gene_Bol022979	LOC106335206	308.386	328.109	309.555	199.263	242.095	223.269	120.27	111.255	47.4782	-0.806722	down	-0.922649	down	--	--
gene_Bol022999	gene_Bol022999	LOC106405732	5.72631	9.88897	7.01852	4.56939	3.52317	4.27991	1.76718	2.46549	0.547035	-1.17721	down	-1.06265	down	--	--
gene_Bol023003	gene_Bol023003	--	72.6157	55.4011	69.4622	42.8994	35.6933	29.4555	6.16823	6.48301	7.8182	-1.16522	down	-1.94201	down	--	--
gene_Bol023013	gene_Bol023013	LOC106334852	49.6958	46.5299	42.5288	2.6044	2.45342	11.2206	0.299456	0	0	-3.40025	down	-5.34312	down	--	--
gene_Bol023023	gene_Bol023023	LOC106341917	30.8777	24.2328	25.1488	4.02901	3.79613	6.99066	2.29231	2.67909	0.878761	-2.73295	down	-1.00677	down	K12462|9.8e-127|boe:106341917|K12462 Rho GDP-dissociation inhibitor | (RefSeq) rho GDP-dissociation inhibitor 1-like	--
gene_Bol023104	gene_Bol023104	--	47.2841	35.2553	28.4861	12.8232	12.4496	12.7569	6.93158	7.27187	3.10383	-1.82907	down	-0.78178	down	K00924|1.6e-09|lsv:111911418|K00924 kinase [EC:2.7.1.-] | (RefSeq) probable serine/threonine-protein kinase PBL19	--
gene_Bol023152	gene_Bol023152	LOC106378037	65.8872	33.2714	20.1322	18.9322	29.4444	18.7454	3.73314	2.55947	0.435686	-1.09787	down	-3.0257	down	K01051|3.0e-90|bna:106378037|K01051 pectinesterase [EC:3.1.1.11] | (RefSeq) probable pectinesterase/pectinesterase inhibitor 25	Pentose and glucuronate interconversions (ko00040)
gene_Bol023155	gene_Bol023155	LOC106343575	57.359	36.3006	21.9013	23.4138	32.9214	20.3754	2.35091	1.75397	0.505867	-0.86447	down	-3.75135	down	K01051|0.0e+00|bna:106381178|K01051 pectinesterase [EC:3.1.1.11] | (RefSeq) probable pectinesterase/pectinesterase inhibitor 25	Pentose and glucuronate interconversions (ko00040)
gene_Bol023158	gene_Bol023158	LOC106381176	14.3021	14.5406	14.3682	13.9	8.57214	9.91142	4.82873	6.57295	3.77243	-0.717875	down	-0.710826	down	K14491|2.8e-20|bna:106401571|K14491 two-component response regulator ARR-B family | (RefSeq) two-component response regulator ARR1-like	Plant hormone signal transduction (ko04075)
gene_Bol023261	gene_Bol023261	LOC106433608	8.73565	15.5543	13.1999	6.17958	7.17981	5.59972	2.47317	2.97006	0.758657	-1.28632	down	-1.30966	down	K15718|0.0e+00|bna:106433608|K15718 linoleate 9S-lipoxygenase [EC:1.13.11.58] | (RefSeq) linoleate 9S-lipoxygenase 5, chloroplastic isoform X1	Linoleic acid metabolism (ko00591)
gene_Bol023339	gene_Bol023339	--	12.3356	13.2608	14.0823	7.26345	5.46952	9.79993	1.40291	1.63352	0.714251	-1.12526	down	-2.21022	down	--	--
gene_Bol023353	gene_Bol023353	LOC106311919	467.958	741.735	592.158	69.4972	83.8297	110.154	38.4268	42.2057	6.55173	-3.0807	down	-1.32599	down	K02717|4.8e-143|boe:106311919|K02717 photosystem II oxygen-evolving enhancer protein 2 | (RefSeq) oxygen-evolving enhancer protein 2, chloroplastic	Photosynthesis (ko00195)
gene_Bol023384	gene_Bol023384	LOC106307917	11.668	4.99322	1.96744	1.23121	1.83974	2.12359	0.138885	0.685523	0	-2.10626	down	-2.36248	down	K14424|2.4e-158|bna:111208485|K14424 plant 4alpha-monomethylsterol monooxygenase [EC:1.14.18.11] | (RefSeq) methylsterol monooxygenase 2-2-like isoform X1	Steroid biosynthesis (ko00100)
gene_Bol023593	gene_Bol023593	LOC106308110	1.02609	2.14024	4.39306	1.15668	1.45788	1.05582	0.483396	0.190946	0.203761	-1.34707	down	-1.61289	down	K17338|1.2e-145|bna:106440751|K17338 receptor expression-enhancing protein 1/2/3/4 | (RefSeq) HVA22-like protein h	--
gene_Bol023600	gene_Bol023600	LOC106307428	76.9538	100.516	120.796	5.83613	3.7516	6.5256	0.268582	0.538113	0	-4.52356	down	-4.01367	down	K02641|4.7e-208|bna:106433179|K02641 ferredoxin--NADP+ reductase [EC:1.18.1.2] | (RefSeq) ferredoxin--NADP reductase, leaf isozyme 2, chloroplastic-like	Photosynthesis (ko00195)
gene_Bol023613	gene_Bol023613	LOC106431163	508.259	403.18	258.942	177.672	205.845	254.519	85.4941	78.9597	14.09	-1.16443	down	-1.56505	down	K02638|3.3e-81|bna:106431163|K02638 plastocyanin | (RefSeq) plastocyanin	Photosynthesis (ko00195)
gene_Bol023814	gene_Bol023814	LOC106405843	44.0959	58.7391	57.3764	22.1154	19.7484	26.1372	9.29752	9.83659	1.63503	-1.54382	down	-1.43693	down	--	--
gene_Bol023919	gene_Bol023919	LOC106406783	21.6057	19.0411	13.5153	9.36202	9.04268	12.3246	2.52726	3.42596	0.1862	-1.11364	down	-2.07452	down	K01956|3.3e-250|bna:106406783|K01956 carbamoyl-phosphate synthase small subunit [EC:6.3.5.5] | (RefSeq) carbamoyl-phosphate synthase small chain, chloroplastic-like isoform X1	Pyrimidine metabolism (ko00240);; Alanine, aspartate and glutamate metabolism (ko00250)
gene_Bol023941	gene_Bol023941	LOC106296822	10.4981	13.0928	17.0671	3.96569	3.61551	6.49271	0.872532	2.55615	0.125364	-1.84302	down	-1.71198	down	--	--
gene_Bol024073	gene_Bol024073	LOC106300516	265.088	560.028	963.659	52.5691	73.7938	141.027	2.58158	15.002	1.04239	-3.07106	down	-3.58539	down	K15893|8.3e-218|bna:106406114|K15893 glycerate dehydrogenase [EC:1.1.1.29] | (RefSeq) glycerate dehydrogenase HPR, peroxisomal-like	Glycine, serine and threonine metabolism (ko00260);; Glyoxylate and dicarboxylate metabolism (ko00630);; Carbon metabolism (ko01200)
gene_Bol024091	gene_Bol024091	LOC111210043	17.2279	29.8501	30.0553	12.3999	13.0244	22.1612	5.07545	6.0317	0.822292	-1.01257	down	-1.72009	down	--	--
gene_Bol024337	gene_Bol024337	LOC106421135	73.3014	58.6474	66.6731	28.297	28.3763	73.5511	5.27175	23.8554	9.3608	-0.918246	down	-1.37683	down	K02358|2.1e-170|bna:106421135|K02358 elongation factor Tu | (RefSeq) elongation factor Tu, chloroplastic-like	Plant-pathogen interaction (ko04626)
gene_Bol024389	gene_Bol024389	--	3.61506	2.92573	3.63788	1.43233	2.44172	3.53026	0.433833	1.20687	0.251999	-0.758239	down	-1.6379	down	K07466|1.2e-266|eus:EUTSA_v10000781mg|K07466 replication factor A1 | (RefSeq) hypothetical protein	DNA replication (ko03030);; Nucleotide excision repair (ko03420);; Mismatch repair (ko03430);; Homologous recombination (ko03440)
gene_Bol024517	gene_Bol024517	--	3.3703	2.61304	2.74048	1.76737	1.84458	1.81155	1.08727	1.04975	0.350757	-0.978534	down	-0.797493	down	K16570|0.0e+00|boe:106327789|K16570 gamma-tubulin complex component 3 | (RefSeq) gamma-tubulin complex component 3	--
gene_Bol024528	gene_Bol024528	LOC106324910	4.21574	12.8022	6.59557	2.28455	2.34096	1.8549	0.279498	0.457513	0.384285	-2.16278	down	-2.05216	down	--	--
gene_Bol024579	gene_Bol024579	LOC106327839	94.0394	52.991	56.3019	6.04538	6.91502	4.55249	0.345262	1.41906	0.827291	-3.81183	down	-2.32159	down	K16221|5.3e-106|bna:106380529|K16221 transcription factor TCP21 (protein CCA1 HIKING EXPEDITION) | (RefSeq) transcription factor TCP21 isoform X1	Circadian rhythm - plant (ko04712)
gene_Bol024580	gene_Bol024580	--	125.009	30.4703	38.3019	3.12888	4.28041	4.20867	0.143547	0.225309	0	-4.32545	down	-4.4907	down	K07407|8.0e-235|bna:106380528|K07407 alpha-galactosidase [EC:3.2.1.22] | (RefSeq) alpha-galactosidase 2-like	Galactose metabolism (ko00052);; Glycerolipid metabolism (ko00561);; Sphingolipid metabolism (ko00600);; Glycosphingolipid biosynthesis - globo and isoglobo series (ko00603)
gene_Bol024584	gene_Bol024584	--	12.9938	7.54386	8.10102	4.89696	7.29246	6.51911	3.104	3.83793	2.42289	-0.897726	down	-0.614648	down	K06961|8.0e-163|bna:106380535|K06961 ribosomal RNA assembly protein | (RefSeq) KRR1 small subunit processome component homolog	--
gene_Bol024617	gene_Bol024617	--	239.387	464.544	555.587	96.9815	116.832	170.046	23.4106	35.8859	1.92386	-2.03229	down	-2.40811	down	K00026|1.1e-148|bna:106385336|K00026 malate dehydrogenase [EC:1.1.1.37] | (RefSeq) malate dehydrogenase 1, glyoxysomal	Citrate cycle (TCA cycle) (ko00020);; Cysteine and methionine metabolism (ko00270);; Pyruvate metabolism (ko00620);; Glyoxylate and dicarboxylate metabolism (ko00630);; Carbon fixation in photosynthetic organisms (ko00710);; Carbon metabolism (ko01200)
gene_Bol024658	gene_Bol024658	LOC106409114	86.8444	101.136	31.6377	6.71657	13.0974	8.28258	0.266467	2.76547	0.291103	-3.24321	down	-2.74791	down	--	--
gene_Bol024853	gene_Bol024853	--	22.1429	54.9684	44.3537	6.33118	10.4003	12.6236	2.29169	2.54689	0.468906	-2.35728	down	-2.11627	down	--	--
gene_Bol024873	gene_Bol024873	LOC106328545	14.0858	25.7252	51.0037	2.65126	3.78834	2.62317	0.567371	0.496173	0.492243	-3.63735	down	-2.08134	down	--	--
gene_Bol024878	gene_Bol024878	LOC103873241	1121.36	1927.16	1389.37	119.679	133.58	159.803	51.5244	76.0044	11.3344	-3.73118	down	-1.30082	down	K08910|1.3e-145|bna:106435287|K08910 light-harvesting complex I chlorophyll a/b binding protein 4 | (RefSeq) chlorophyll a-b binding protein 4, chloroplastic	Photosynthesis - antenna proteins (ko00196)
gene_Bol024887	gene_Bol024887	--	31.7046	33.3807	38.7386	26.6534	25.1786	17.0417	7.18283	4.92459	2.84775	-0.891627	down	-1.842	down	--	--
gene_Bol024895	gene_Bol024895	--	17.8602	14.3166	8.37244	3.41397	3.89162	4.16579	0.80651	1.95987	0.14603	-2.10619	down	-1.70933	down	K13428|4.4e-21|boe:106313961|K13428 LRR receptor-like serine/threonine-protein kinase EFR [EC:2.7.11.1] | (RefSeq) LRR receptor-like serine/threonine-protein kinase EFR	Plant-pathogen interaction (ko04626)
gene_Bol024995	gene_Bol024995	--	23.3529	27.139	29.3594	4.47537	3.45017	6.67151	1.65338	1.31263	0.831219	-2.7606	down	-1.54558	down	K04040|1.2e-209|boe:106311688|K04040 chlorophyll/bacteriochlorophyll a synthase [EC:2.5.1.62 2.5.1.133] | (RefSeq) chlorophyll synthase, chloroplastic-like	Porphyrin and chlorophyll metabolism (ko00860)
gene_Bol025066	gene_Bol025066	--	3.44631	7.24634	1.87792	2.24297	1.51139	1.92149	0.623337	0.381436	0	-1.44799	down	-2.23866	down	K03531|9.7e-256|boe:106311777|K03531 cell division protein FtsZ | (RefSeq) cell division protein FtsZ homolog 2-2, chloroplastic	--
gene_Bol025120	gene_Bol025120	LOC106312266	156.565	433.84	188.687	91.5643	101.339	208.04	2.43428	41.8772	0.600776	-1.27309	down	-2.93362	down	K09872|1.1e-161|bna:106433954|K09872 aquaporin PIP | (RefSeq) aquaporin PIP2-1	--
gene_Bol025121	gene_Bol025121	LOC106311684	87.4043	87.9539	68.312	61.0204	65.4352	67.4804	31.6024	40.6987	11.1361	-0.624462	down	-0.908954	down	K02870|2.4e-87|boe:106311684|K02870 large subunit ribosomal protein L12e | (RefSeq) 60S ribosomal protein L12-2	Ribosome (ko03010)
gene_Bol025158	gene_Bol025158	LOC103829952	13.9562	8.71273	6.58029	5.54425	5.80472	7.60799	1.51223	3.20729	2.05974	-0.918745	down	-1.0436	down	K02971|1.8e-40|bna:106356722|K02971 small subunit ribosomal protein S21e | (RefSeq) 40S ribosomal protein S21-2-like	Ribosome (ko03010)
gene_Bol025168	gene_Bol025168	LOC106415159	124.329	197.269	166.328	9.06099	9.75084	15.755	1.30102	1.9414	0.129925	-4.12917	down	-3.08325	down	K03841|2.8e-222|bna:106415159|K03841 fructose-1,6-bisphosphatase I [EC:3.1.3.11] | (RefSeq) fructose-1,6-bisphosphatase, chloroplastic-like	Glycolysis / Gluconeogenesis (ko00010);; Pentose phosphate pathway (ko00030);; Fructose and mannose metabolism (ko00051);; Carbon fixation in photosynthetic organisms (ko00710);; Carbon metabolism (ko01200)
gene_Bol025172	gene_Bol025172	--	14.1881	21.4353	18.4419	13.2325	12.1511	12.5143	6.554	8.11707	3.51043	-0.817863	down	-0.70883	down	K00847|6.5e-50|ccav:112518903|K00847 fructokinase [EC:2.7.1.4] | (RefSeq) probable fructokinase-6, chloroplastic	Fructose and mannose metabolism (ko00051);; Starch and sucrose metabolism (ko00500);; Amino sugar and nucleotide sugar metabolism (ko00520)
gene_Bol025183	gene_Bol025183	LOC106307621	35.8816	97.2621	72.0805	12.6443	15.0796	18.0876	2.58106	4.35711	0.870912	-2.47271	down	-2.23228	down	K02879|6.6e-111|boe:106307621|K02879 large subunit ribosomal protein L17 | (RefSeq) 50S ribosomal protein L17, chloroplastic	Ribosome (ko03010)
gene_Bol025210	gene_Bol025210	LOC106337298	49.112	41.5211	44.2956	23.7939	26.1875	28.6284	14.0039	14.8536	9.89789	-1.07546	down	-0.635761	down	K02870|4.0e-87|boe:106337298|K02870 large subunit ribosomal protein L12e | (RefSeq) 60S ribosomal protein L12-2-like	Ribosome (ko03010)
gene_Bol025226	gene_Bol025226	LOC106342421	9.58282	7.74213	8.80316	3.45523	1.95076	2.35675	0.740621	0.446642	0	-2.04879	down	-2.44338	down	K14292|3.7e-18|spen:107013477|K14292 trimethylguanosine synthase [EC:2.1.1.-] | (RefSeq) trimethylguanosine synthase	RNA transport (ko03013)
gene_Bol025227	gene_Bol025227	--	30.226	29.9119	25.3069	22.0306	20.1183	19.2503	8.95841	14.4691	6.54011	-0.77181	down	-0.672237	down	--	--
gene_Bol025285	gene_Bol025285	LOC106342912	267.088	479.106	498.458	56.9494	57.7306	76.346	9.12073	11.5547	4.33951	-3.01739	down	-2.59291	down	K06215|1.3e-168|bna:106405963|K06215 pyridoxal 5'-phosphate synthase pdxS subunit [EC:4.3.3.6] | (RefSeq) pyridoxal 5'-phosphate synthase subunit PDX1.1	Vitamin B6 metabolism (ko00750)
gene_Bol025300	gene_Bol025300	--	249.487	375.166	194.309	5.77952	23.1471	25.0211	1.70581	0.974136	0.056972	-4.21654	down	-3.97487	down	--	--
gene_Bol025301	gene_Bol025301	--	204.784	339.163	181.914	4.6543	19.1237	19.9944	1.20853	0.832648	0.063123	-4.34472	down	-3.97465	down	--	--
gene_Bol025304	gene_Bol025304	--	144.324	233.014	108.554	4.05646	10.9284	21.8897	1.32712	0.259015	0.039435	-4.02314	down	-4.0951	down	--	--
gene_Bol025333	gene_Bol025333	--	2.00136	1.26503	1.72898	0.843068	0.666388	1.04593	0.285147	0.1792	0.16955	-1.24799	down	-1.5583	down	K19951|3.9e-197|ini:109156060|K19951 TBC1 domain family member 8/9 | (RefSeq) TBC1 domain family member 8B-like	--
gene_Bol025360	gene_Bol025360	LOC106341988	1194.31	2808.3	2746.96	72.5699	97.0293	114.52	16.4346	14.8751	5.02773	-4.88478	down	-2.65548	down	--	--
gene_Bol025379	gene_Bol025379	LOC106337131	11.6096	19.4381	16.6661	11.0619	10.0653	11.3125	0.424108	2.07497	0	-0.862709	down	-3.47434	down	K19747|5.9e-67|egu:105055610|K19747 BAHD acyltransferase [EC:2.3.1.-] | (RefSeq) BAHD acyltransferase DCR	--
gene_Bol025435	gene_Bol025435	LOC106391226	11.5852	11.3249	9.23439	6.84802	6.80032	9.31183	2.62751	4.10772	0.703491	-0.783849	down	-1.33918	down	K03798|2.7e-89|ccp:CHC_T00009248001|K03798 cell division protease FtsH [EC:3.4.24.-] | (RefSeq) cell division protein FtsH	--
gene_Bol025440	gene_Bol025440	LOC106401010	91.6175	257.149	49.9341	8.47494	11.7488	4.34708	1.20364	1.37299	0.187439	-4.30271	down	-2.86944	down	K09873|4.0e-131|bna:106401010|K09873 aquaporin TIP | (RefSeq) aquaporin TIP2-1	--
gene_Bol025522	gene_Bol025522	LOC106342166	101.701	126.046	154.011	54.6697	56.5203	30.8584	18.1145	18.2618	10.7199	-1.72606	down	-1.23003	down	K10775|0.0e+00|boe:106342166|K10775 phenylalanine ammonia-lyase [EC:4.3.1.24] | (RefSeq) phenylalanine ammonia-lyase 1	Phenylalanine metabolism (ko00360);; Phenylpropanoid biosynthesis (ko00940)
gene_Bol025533	gene_Bol025533	LOC106337007	14.9343	23.3375	14.7457	8.20288	4.92305	10.0334	1.69384	1.1587	0.715802	-1.50321	down	-2.30206	down	K11294|2.9e-149|boe:106337007|K11294 nucleolin | (RefSeq) RNA-binding protein CP29B, chloroplastic	--
gene_Bol025534	gene_Bol025534	LOC106337433	45.9589	41.364	55.6709	11.5337	7.34686	18.2505	0.872723	1.29798	1.23113	-2.25753	down	-2.9766	down	K10878|2.3e-83|zju:107432915|K10878 meiotic recombination protein SPO11 | (RefSeq) DNA topoisomerase 6 subunit A-like	--
gene_Bol025609	gene_Bol025609	LOC106328985	50.1533	80.0956	54.3934	1.31672	1.86378	2.65354	0	0.402316	0.216225	-5.28354	down	-2.76074	down	K00434|5.1e-193|boe:106328985|K00434 L-ascorbate peroxidase [EC:1.11.1.11] | (RefSeq) thylakoid lumenal 29 kDa protein, chloroplastic	Ascorbate and aldarate metabolism (ko00053);; Glutathione metabolism (ko00480)
gene_Bol025633	gene_Bol025633	LOC103858523	37.5957	49.3526	61.4593	22.6349	23.8601	18.9755	6.4584	8.46565	0.976644	-1.48525	down	-1.78321	down	K03884|2.8e-28|nau:109243048|K03884 NADH-ubiquinone oxidoreductase chain 6 [EC:7.1.1.2] | (RefSeq) uncharacterized protein LOC109243048	Oxidative phosphorylation (ko00190)
gene_Bol025645	gene_Bol025645	LOC106336515	138.724	291.193	214.283	36.5206	44.8003	50.977	13.5624	18.5878	5.03762	-2.59159	down	-1.5199	down	K02113|1.1e-119|bna:106423548|K02113 F-type H+-transporting ATPase subunit delta | (RefSeq) ATP synthase subunit delta, chloroplastic	Oxidative phosphorylation (ko00190);; Photosynthesis (ko00195)
gene_Bol025646	gene_Bol025646	LOC106336524	4.52784	7.44653	7.8614	1.45988	1.80828	3.0034	0.463282	0.714091	0.391543	-1.96405	down	-1.57206	down	--	--
gene_Bol025668	gene_Bol025668	LOC106331494	34.4943	42.1257	52.3785	15.9455	13.6276	16.9093	5.89342	8.60004	4.15733	-1.78039	down	-0.933369	down	K06995|9.4e-58|bna:106416136|K06995 uncharacterized protein | (RefSeq) uncharacterized protein LOC106416136	--
gene_Bol025670	gene_Bol025670	LOC106328597	113.318	251.335	189.501	11.7374	13.8041	11.8761	4.7677	7.09203	1.29412	-4.19336	down	-1.21785	down	K08916|1.6e-160|boe:106328597|K08916 light-harvesting complex II chlorophyll a/b binding protein 5 | (RefSeq) chlorophyll a-b binding protein CP26, chloroplastic	Photosynthesis - antenna proteins (ko00196)
gene_Bol025706	gene_Bol025706	LOC106438812	135.773	159.773	72.1964	16.1317	8.46745	2.08122	0	0.880015	0.291359	-4.06516	down	-4.04401	down	K01237|1.9e-100|brp:103860090|K01237 myrosinase [EC:3.2.1.147] | (RefSeq) myrosinase	Tryptophan metabolism (ko00380)
gene_Bol025721	gene_Bol025721	--	9.81285	9.7592	6.1284	4.89134	7.23814	3.88149	1.30169	3.46024	1.21564	-0.96188	down	-1.07821	down	--	--
gene_Bol025795	gene_Bol025795	LOC106334474	7.92484	21.3433	15.8098	6.23906	10.3184	11.3479	1.03302	3.77793	0.853004	-1.00185	down	-1.9564	down	K02221|2.1e-135|bna:106386971|K02221 YggT family protein | (RefSeq) ylmG homolog protein 2, chloroplastic-like	--
gene_Bol025829	gene_Bol025829	--	9.53023	13.3542	11.7847	4.80023	4.62955	5.39824	1.48443	2.83279	1.03847	-1.52749	down	-1.10793	down	--	--
gene_Bol025833	gene_Bol025833	LOC106329460	4.31415	2.16021	3.52434	2.29134	1.55853	1.85236	0	0.204203	0	-1.10429	down	-4.43249	down	K13356|3.4e-275|bna:106386937|K13356 alcohol-forming fatty acyl-CoA reductase [EC:1.2.1.84] | (RefSeq) putative fatty acyl-CoA reductase 7 isoform X1	Cutin, suberine and wax biosynthesis (ko00073);; Peroxisome (ko04146)
gene_Bol025970	gene_Bol025970	LOC106334945	13.2866	11.6305	9.80095	5.03386	8.60226	7.46906	0	0.315086	0	-1.0081	down	-5.73452	down	K01188|7.8e-248|bna:106435893|K01188 beta-glucosidase [EC:3.2.1.21] | (RefSeq) beta-glucosidase 3-like	Cyanoamino acid metabolism (ko00460);; Starch and sucrose metabolism (ko00500);; Phenylpropanoid biosynthesis (ko00940)
gene_Bol025985	gene_Bol025985	LOC106335373	95.7513	109.218	106.186	61.4752	63.0319	108.408	8.04398	32.7392	6.56548	-0.726068	down	-1.98678	down	K00051|3.4e-258|boe:106335373|K00051 malate dehydrogenase (NADP+) [EC:1.1.1.82] | (RefSeq) malate dehydrogenase [NADP], chloroplastic-like	Pyruvate metabolism (ko00620);; Carbon fixation in photosynthetic organisms (ko00710);; Carbon metabolism (ko01200)
gene_Bol025990	gene_Bol025990	LOC106335187	14.1279	35.6253	31.1473	3.56968	5.72959	6.67846	1.79953	1.07934	0.497074	-2.64631	down	-1.90441	down	--	--
gene_Bol026051	gene_Bol026051	LOC106387317	60.4065	89.6139	111.202	13.0587	6.63248	14.9787	2.29682	3.09081	0.363563	-3.23105	down	-2.3056	down	K08234|3.7e-108|bna:106387317|K08234 glyoxylase I family protein | (RefSeq) uncharacterized protein LOC106387317	--
gene_Bol026085	gene_Bol026085	LOC106353938	92.1285	85.4805	86.0139	60.6803	72.5418	76.51	26.0524	41.7551	9.15439	-0.627752	down	-1.14889	down	K02880|4.7e-94|bna:106353938|K02880 large subunit ribosomal protein L17e | (RefSeq) 60S ribosomal protein L17-2-like	Ribosome (ko03010)
gene_Bol026087	gene_Bol026087	--	6.33476	7.5747	6.61955	4.22361	3.7642	4.6142	1.98967	2.23153	0.368147	-1.00449	down	-1.17223	down	K06949|8.2e-258|boe:106300705|K06949 ribosome biogenesis GTPase / thiamine phosphate phosphatase [EC:3.6.1.- 3.1.3.100] | (RefSeq) putative ribosome biogenesis GTPase RsgA	Thiamine metabolism (ko00730)
gene_Bol026097	gene_Bol026097	LOC106300693	6.19055	4.94668	4.96718	4.57446	3.45231	3.82082	2.0769	1.98752	0.590188	-0.736921	down	-1.01292	down	K14830|1.7e-193|boe:106300693|K14830 protein MAK11 | (RefSeq) p21-activated protein kinase-interacting protein 1-like	--
gene_Bol026111	gene_Bol026111	--	165.137	258.439	242.925	129.812	157.823	159.367	69.3436	77.2102	38.1371	-0.88224	down	-0.923189	down	K03798|0.0e+00|brp:103831194|K03798 cell division protease FtsH [EC:3.4.24.-] | (RefSeq) ATP-dependent zinc metalloprotease FTSH 1, chloroplastic	--
gene_Bol026114	gene_Bol026114	LOC103831199	75.9998	109.677	89.3958	7.15825	9.7389	15.5769	2.13727	3.19243	1.17667	-3.38707	down	-1.96225	down	K02723|1.2e-93|brp:103831199|K02723 photosystem II PsbY protein | (RefSeq) photosystem II core complex proteins psbY, chloroplastic	Photosynthesis (ko00195)
gene_Bol026140	gene_Bol026140	LOC106298205	24.0624	19.4081	15.8228	11.2738	11.4215	11.4186	5.85189	7.61802	2.41506	-1.08699	down	-0.776167	down	K00966|6.9e-196|boe:106298205|K00966 mannose-1-phosphate guanylyltransferase [EC:2.7.7.13] | (RefSeq) mannose-1-phosphate guanyltransferase alpha-like isoform X1	Fructose and mannose metabolism (ko00051);; Amino sugar and nucleotide sugar metabolism (ko00520)
gene_Bol026165	gene_Bol026165	LOC106300254	77.8021	157.997	82.6231	3.09323	3.01636	4.60815	0.913563	1.28159	0.15083	-5.19742	down	-1.89698	down	K10960|8.5e-268|boe:106300254|K10960 geranylgeranyl diphosphate/geranylgeranyl-bacteriochlorophyllide a reductase [EC:1.3.1.83 1.3.1.111] | (RefSeq) geranylgeranyl diphosphate reductase, chloroplastic	Porphyrin and chlorophyll metabolism (ko00860);; Terpenoid backbone biosynthesis (ko00900)
gene_Bol026182	gene_Bol026182	LOC106299879	68.5598	51.0332	27.8982	1.79256	2.57866	2.24819	0.843948	1.01029	0.960966	-4.75372	down	-0.801392	down	K03695|0.0e+00|bna:106354342|K03695 ATP-dependent Clp protease ATP-binding subunit ClpB | (RefSeq) chaperone protein ClpB1	--
gene_Bol026252	gene_Bol026252	--	341.737	357.455	407.563	13.652	11.8554	15.4839	8.63938	4.13469	0.928767	-5.05999	down	-1.30536	down	K11838|1.9e-07|cmo:103486723|K11838 ubiquitin carboxyl-terminal hydrolase 7 [EC:3.4.19.12] | (RefSeq) ubiquitin carboxyl-terminal hydrolase 12	--
gene_Bol026268	gene_Bol026268	LOC106301099	7.95026	7.79321	5.07562	1.97904	1.30279	2.96316	0.241557	0.312412	0.410361	-2.03952	down	-2.19577	down	K09338|3.7e-250|boe:106301099|K09338 homeobox-leucine zipper protein | (RefSeq) homeobox-leucine zipper protein HDG11-like	--
gene_Bol026295	gene_Bol026295	LOC106300169	14.2528	33.8105	30.5911	3.11498	4.57377	6.33875	0.65455	1.46023	0.11604	-2.80025	down	-2.34972	down	--	--
gene_Bol026296	gene_Bol026296	--	8.66684	11.9561	10.2696	5.08087	5.06139	6.20619	1.43468	1.67324	0.200731	-1.22342	down	-2.03373	down	K13416|4.6e-07|dzi:111309127|K13416 brassinosteroid insensitive 1-associated receptor kinase 1 [EC:2.7.10.1 2.7.11.1] | (RefSeq) BRASSINOSTEROID INSENSITIVE 1-associated receptor kinase 1-like isoform X1	MAPK signaling pathway - plant (ko04016);; Plant hormone signal transduction (ko04075);; Plant-pathogen interaction (ko04626)
gene_Bol026326	gene_Bol026326	LOC106402858	24.4242	20.0034	17.7596	9.80477	7.64221	14.3089	4.03719	4.30828	0.283808	-1.26825	down	-1.61757	down	K06944|7.4e-181|bna:106402858|K06944 uncharacterized protein | (RefSeq) developmentally-regulated G-protein 2	--
gene_Bol026328	gene_Bol026328	LOC106406662	9.47493	15.0502	14.8489	6.41534	8.05291	5.69292	0.686073	2.17375	0.060857	-1.26631	down	-2.50858	down	K10844|3.4e-22|mng:MNEG_0064|K10844 DNA excision repair protein ERCC-2 [EC:3.6.4.12] | (RefSeq) DNA excision repair protein ERCC-2	Basal transcription factors (ko03022);; Nucleotide excision repair (ko03420)
gene_Bol026330	gene_Bol026330	LOC106300625	1285.23	1241.44	994.466	30.9984	53.8692	17.7251	5.43668	8.70662	3.61516	-5.37888	down	-2.18795	down	--	--
gene_Bol026347	gene_Bol026347	LOC106406427	67.7112	53.3969	44.9545	35.3244	37.8939	43.9999	14.3757	25.587	6.76975	-0.795207	down	-1.01096	down	K02998|1.9e-164|bna:106406427|K02998 small subunit ribosomal protein SAe | (RefSeq) 40S ribosomal protein SA-like	Ribosome (ko03010)
gene_Bol026426	gene_Bol026426	--	198.795	274.62	228.146	182.685	187.18	192.954	91.2688	124.183	55.4926	-0.620432	down	-0.702652	down	K02639|2.4e-81|bna:106424335|K02639 ferredoxin | (RefSeq) ferredoxin, root R-B2	Photosynthesis (ko00195)
gene_Bol026471	gene_Bol026471	LOC106341747	8.22897	8.37151	6.67213	2.65044	3.75035	3.2138	0.799805	1.48855	0.232415	-1.56521	down	-1.6453	down	K08712|7.6e-32|gsl:Gasu_29800|K08712 ATP-binding cassette, subfamily G (WHITE), member 2, SNQ2 | (RefSeq) ABC transporter, ATP-binding protein	ABC transporters (ko02010)
gene_Bol026606	gene_Bol026606	--	8.13694	7.69293	8.88399	6.01504	5.68993	8.39093	2.39105	2.3577	1.0113	-0.604475	down	-1.45234	down	K14498|1.1e-15|apro:F751_4259|K14498 serine/threonine-protein kinase SRK2 [EC:2.7.11.1] | (RefSeq) Serine/threonine-protein kinase SAPK10	MAPK signaling pathway - plant (ko04016);; Plant hormone signal transduction (ko04075)
gene_Bol026635	gene_Bol026635	LOC106336327	344.92	685.3	545.018	33.1315	36.8302	44.4793	21.8704	22.0064	8.17759	-4.09061	down	-0.805002	down	--	--
gene_Bol026660	gene_Bol026660	--	13.9611	17.5902	19.5973	13.9766	10.4309	13.9175	4.34115	4.77403	2.99458	-0.726675	down	-1.25798	down	K09286|7.5e-38|bna:106384383|K09286 EREBP-like factor | (RefSeq) ethylene-responsive transcription factor 7-like	--
gene_Bol026661	gene_Bol026661	BNAC03G41510D	35.2962	41.4043	52.3025	10.5352	12.2468	16.5435	3.77727	4.49306	5.18561	-2.02236	down	-1.08389	down	--	--
gene_Bol026715	gene_Bol026715	--	30.3202	42.7639	50.2319	28.9507	25.5146	44.1106	13.9355	17.2841	9.95521	-0.638731	down	-0.877389	down	K00026|7.1e-187|boe:106296346|K00026 malate dehydrogenase [EC:1.1.1.37] | (RefSeq) malate dehydrogenase 1, mitochondrial-like	Citrate cycle (TCA cycle) (ko00020);; Cysteine and methionine metabolism (ko00270);; Pyruvate metabolism (ko00620);; Glyoxylate and dicarboxylate metabolism (ko00630);; Carbon fixation in photosynthetic organisms (ko00710);; Carbon metabolism (ko01200)
gene_Bol026763	gene_Bol026763	LOC106300594	23.6739	56.9807	56.4372	3.01311	2.68606	2.70142	0.848987	1.21586	0.120391	-4.33596	down	-1.65516	down	--	--
gene_Bol026768	gene_Bol026768	LOC106300644	130.273	34.3043	73.2481	13.9965	4.15247	6.45634	0.187622	2.90095	0.323871	-3.56063	down	-2.54835	down	--	--
gene_Bol026849	gene_Bol026849	LOC106295000	42.8538	26.5537	36.2769	21.8159	14.0761	17.9162	3.40232	4.84864	1.22152	-1.27147	down	-2.18134	down	K14503|8.4e-169|boe:106295000|K14503 brassinosteroid resistant 1/2 | (RefSeq) protein BRASSINAZOLE-RESISTANT 2	Plant hormone signal transduction (ko04075)
gene_Bol026859	gene_Bol026859	LOC106343384	95.2977	68.6492	40.461	44.7326	62.2906	47.8143	6.65405	24.8165	3.72007	-0.679529	down	-1.85623	down	K03444|1.1e-246|boe:106343384|K03444 MFS transporter, SP family, ERD6-like sugar transporter | (RefSeq) sugar transporter ERD6-like 4	--
gene_Bol026873	gene_Bol026873	LOC106295217	148.817	127.234	177.583	76.8821	80.773	92.5539	19.44	38.0493	8.33061	-1.16116	down	-1.62352	down	K21888|5.5e-121|bna:106401061|K21888 glutathione dehydrogenase/transferase [EC:1.8.5.1 2.5.1.18] | (RefSeq) glutathione S-transferase DHAR1, mitochondrial	Ascorbate and aldarate metabolism (ko00053);; Glutathione metabolism (ko00480)
gene_Bol026888	gene_Bol026888	--	2.39548	2.85411	3.81859	1.7043	1.59455	2.3327	0.808849	0.354679	0.448314	-0.989388	down	-1.38084	down	K07893|1.1e-09|ini:109192111|K07893 Ras-related protein Rab-6A | (RefSeq) ras-related protein RABH1b-like	--
gene_Bol026950	gene_Bol026950	LOC106296130	182.748	307.05	285.402	28.8015	29.9352	35.2695	5.30937	2.83514	1.21226	-3.35185	down	-2.99014	down	K02638|2.3e-82|bna:111198563|K02638 plastocyanin | (RefSeq) plastocyanin-like	Photosynthesis (ko00195)
gene_Bol026985	gene_Bol026985	LOC106421373	7.23795	12.3074	7.8938	4.82241	4.52493	7.25038	1.34504	1.09394	0.199542	-1.03432	down	-2.33323	down	K01802|3.8e-128|bna:106421373|K01802 peptidylprolyl isomerase [EC:5.2.1.8] | (RefSeq) peptidyl-prolyl cis-trans isomerase FKBP18, chloroplastic isoform X1	--
gene_Bol027018	gene_Bol027018	LOC106312368	45.2509	64.4115	65.4663	9.36647	10.8753	13.828	3.50099	3.58919	0.344857	-2.6691	down	-1.9365	down	K00939|9.7e-311|boe:106312368|K00939 adenylate kinase [EC:2.7.4.3] | (RefSeq) adenylate kinase 5, chloroplastic	Purine metabolism (ko00230);; Thiamine metabolism (ko00730)
gene_Bol027129	gene_Bol027129	LOC106358417	33.6782	38.8172	19.4233	2.49397	2.89208	3.7913	0.551413	1.88745	0.586159	-3.61787	down	-1.25138	down	--	--
gene_Bol027130	gene_Bol027130	--	10.5294	8.15824	3.70828	3.82823	3.10565	3.22381	0.65389	1.96656	0.336406	-1.41884	down	-1.46495	down	K13415|9.4e-19|mdm:103413440|K13415 protein brassinosteroid insensitive 1 [EC:2.7.10.1 2.7.11.1] | (RefSeq) uncharacterized protein LOC103413440 isoform X1	Plant hormone signal transduction (ko04075)
gene_Bol027175	gene_Bol027175	LOC106306585	842.824	1248.61	1182.82	149.86	176.424	211.137	30.2551	70.4381	5.72005	-2.91431	down	-2.08595	down	K02716|9.3e-184|boe:106306585|K02716 photosystem II oxygen-evolving enhancer protein 1 | (RefSeq) oxygen-evolving enhancer protein 1-1, chloroplastic-like	Photosynthesis (ko00195)
gene_Bol027222	gene_Bol027222	--	505.655	592.02	738.753	229.272	233.634	346.706	85.3233	145.015	28.4782	-1.49259	down	-1.35358	down	K09838|0.0e+00|brp:103829545|K09838 zeaxanthin epoxidase [EC:1.14.15.21] | (RefSeq) zeaxanthin epoxidase, chloroplastic	Carotenoid biosynthesis (ko00906)
gene_Bol027270	gene_Bol027270	--	17.2789	17.8206	13.6059	3.88745	2.37805	1.70248	0.335215	1.30231	0.229796	-2.90011	down	-1.75218	down	K00655|5.3e-61|sind:105166581|K00655 1-acyl-sn-glycerol-3-phosphate acyltransferase [EC:2.3.1.51] | (RefSeq) uncharacterized protein LOC105166581	Glycerolipid metabolism (ko00561);; Glycerophospholipid metabolism (ko00564)
gene_Bol027347	gene_Bol027347	LOC106341432	1454.03	2305.29	1030.23	145.18	149.361	137.793	26.4694	42.6955	12.8404	-3.76459	down	-2.07693	down	K08912|4.0e-153|boe:106341432|K08912 light-harvesting complex II chlorophyll a/b binding protein 1 | (RefSeq) chlorophyll a-b binding protein 1, chloroplastic-like	Photosynthesis - antenna proteins (ko00196)
gene_Bol027348	gene_Bol027348	LOC106341431	785.559	1638.55	604.626	72.9439	65.1674	54.283	8.00039	8.12892	5.33998	-4.27335	down	-2.78073	down	K08912|5.2e-153|bna:106396209|K08912 light-harvesting complex II chlorophyll a/b binding protein 1 | (RefSeq) chlorophyll a-b binding protein 1, chloroplastic	Photosynthesis - antenna proteins (ko00196)
gene_Bol027375	gene_Bol027375	--	13.9099	26.2729	28.7433	17.4581	12.4344	16.2926	7.09363	8.52795	4.26067	-0.893376	down	-0.852717	down	K14066|1.5e-204|bna:106396189|K14066 geranyl diphosphate synthase [EC:2.5.1.1] | (RefSeq) solanesyl diphosphate synthase 3, chloroplastic/mitochondrial-like isoform X1	Terpenoid backbone biosynthesis (ko00900)
gene_Bol027385	gene_Bol027385	LOC106342240	83.3539	119.848	102.582	11.6164	19.7095	12.6002	2.10073	5.82944	4.76472	-3.09436	down	-1.34264	down	K07375|5.1e-262|boe:106342240|K07375 tubulin beta | (RefSeq) tubulin beta chain	Phagosome (ko04145)
gene_Bol027430	gene_Bol027430	--	30.8988	31.0239	20.4394	9.02905	7.25599	6.4424	3.31385	3.69895	2.61132	-2.14872	down	-0.841279	down	K01883|2.1e-14|brp:103844710|K01883 cysteinyl-tRNA synthetase [EC:6.1.1.16] | (RefSeq) cysteine--tRNA ligase	Aminoacyl-tRNA biosynthesis (ko00970)
gene_Bol027432	gene_Bol027432	--	286.159	272.063	282.533	53.6028	49.9604	99.0668	11.8038	36.2462	17.3891	-2.35935	down	-1.23578	down	--	--
gene_Bol027445	gene_Bol027445	LOC106342806	20.7726	25.7019	24.7856	10.5851	8.20588	8.53031	1.99936	4.63446	0.561965	-1.6836	down	-1.64171	down	--	--
gene_Bol027469	gene_Bol027469	--	55.2581	112.697	73.7797	23.2599	27.0591	32.9634	8.9972	8.5973	1.97588	-1.84376	down	-1.79189	down	K02871|2.3e-136|bna:106356008|K02871 large subunit ribosomal protein L13 | (RefSeq) 50S ribosomal protein L13, chloroplastic	Ribosome (ko03010)
gene_Bol027537	gene_Bol027537	LOC106300064	369.121	144.587	96.7241	6.48803	7.88776	9.59422	2.61233	4.4933	2.83818	-4.942	down	-0.868867	down	K10534|3.4e-284|boe:106300064|K10534 nitrate reductase (NAD(P)H) [EC:1.7.1.1 1.7.1.2 1.7.1.3] | (RefSeq) nitrate reductase [NADH], clone PBNBR1405	Nitrogen metabolism (ko00910)
gene_Bol027538	gene_Bol027538	--	378.204	149.855	111.525	8.39401	9.18579	13.0964	4.06283	5.49778	4.09255	-4.65769	down	-0.751824	down	K10534|1.3e-159|bna:106354597|K10534 nitrate reductase (NAD(P)H) [EC:1.7.1.1 1.7.1.2 1.7.1.3] | (RefSeq) nitrate reductase [NADH], clone PBNBR1405-like	Nitrogen metabolism (ko00910)
gene_Bol027539	gene_Bol027539	LOC18008676	22.6268	26.3035	25.2706	17.8879	19.5665	19.6264	6.973	8.74642	4.07823	-0.678725	down	-1.16522	down	K02952|8.1e-82|bna:106412066|K02952 small subunit ribosomal protein S13 | (RefSeq) small ribosomal subunit protein S13, mitochondrial-like	Ribosome (ko03010)
gene_Bol027541	gene_Bol027541	--	123.46	86.485	60.357	35.525	41.7019	33.9797	16.7936	10.5811	3.1477	-1.56288	down	-1.57656	down	K12173|1.2e-31|gmx:100794341|K12173 BRCA1-A complex subunit BRE | (RefSeq) BRISC and BRCA1-A complex member 2	Homologous recombination (ko03440)
gene_Bol027650	gene_Bol027650	LOC106300509	18.7736	17.3256	20.3206	11.5956	11.2588	14.12	3.29319	5.60484	4.98532	-0.911135	down	-0.968312	down	K23289|4.5e-205|bna:106406305|K23289 EARP and GARP complex-interacting protein 1 | (RefSeq) WD repeat-containing protein DWA2-like	--
gene_Bol027705	gene_Bol027705	LOC106300986	115.753	70.5954	59.3731	19.3943	21.7513	17.1527	3.39055	9.68161	0.558305	-2.35604	down	-1.85583	down	--	--
gene_Bol027707	gene_Bol027707	LOC106298626	37.5304	75.1516	55.8293	14.4249	19.726	29.5689	4.06948	6.58453	0.2899	-1.71332	down	-2.29073	down	K22520|2.1e-69|boe:106298626|K22520 protein disulfide-isomerase [EC:5.3.4.1] | (RefSeq) protein disulfide-isomerase LQY1, chloroplastic	--
gene_Bol027708	gene_Bol027708	LOC106405801	5.85431	6.28134	8.83158	5.85647	4.46116	1.44022	1.51681	1.25598	0.92936	-1.13111	down	-1.28498	down	K01179|2.9e-187|gra:105803723|K01179 endoglucanase [EC:3.2.1.4] | (RefSeq) endoglucanase 2-like	Starch and sucrose metabolism (ko00500)
gene_Bol027754	gene_Bol027754	LOC106296674	1.8504	4.093	5.49212	1.1581	1.06521	1.06153	0	0.26365	0	-2.10692	down	-3.35346	down	--	--
gene_Bol027775	gene_Bol027775	LOC106342296	7.6552	7.66954	5.14945	1.65575	2.04571	1.26835	0.451373	0.256739	0.071696	-2.31814	down	-2.32559	down	K20359|1.9e-47|eus:EUTSA_v10006389mg|K20359 PRA1 family protein 1 | (RefSeq) hypothetical protein	--
gene_Bol027824	gene_Bol027824	LOC106353869	58.9798	114.208	230.808	5.88439	8.14865	4.08266	0.534529	2.23789	0	-4.78734	down	-2.49542	down	K15893|2.2e-216|bna:106353869|K15893 glycerate dehydrogenase [EC:1.1.1.29] | (RefSeq) glycerate dehydrogenase HPR, peroxisomal-like	Glycine, serine and threonine metabolism (ko00260);; Glyoxylate and dicarboxylate metabolism (ko00630);; Carbon metabolism (ko01200)
gene_Bol027852	gene_Bol027852	LOC106300888	716.108	848.245	1372.27	257.276	184.59	277.426	14.5153	27.8568	3.44868	-2.34606	down	-3.69853	down	K02723|6.5e-100|boe:106300888|K02723 photosystem II PsbY protein | (RefSeq) photosystem II core complex proteins psbY, chloroplastic-like	Photosynthesis (ko00195)
gene_Bol027854	gene_Bol027854	--	87.0557	144.066	147.291	50.2006	43.5996	45.1249	28.4149	25.7081	9.98034	-1.75482	down	-0.788702	down	--	--
gene_Bol027936	gene_Bol027936	LOC106335239	181.644	152.3	180.708	22.6265	24.0028	29.798	6.75988	9.38924	1.25472	-3.05172	down	-1.86099	down	K03146|6.9e-156|bna:106346007|K03146 cysteine-dependent adenosine diphosphate thiazole synthase [EC:2.4.2.60] | (RefSeq) thiamine thiazole synthase, chloroplastic	Thiamine metabolism (ko00730)
gene_Bol027968	gene_Bol027968	LOC106437132	181.37	202.436	223.736	75.538	81.3172	74.5512	34.0694	44.2293	11.7255	-1.69385	down	-1.05909	down	K13066|6.3e-210|bna:106437132|K13066 caffeic acid 3-O-methyltransferase [EC:2.1.1.68] | (RefSeq) flavone 3'-O-methyltransferase 1	Phenylpropanoid biosynthesis (ko00940)
gene_Bol028034	gene_Bol028034	--	5.70885	10.0691	6.62119	5.3619	3.95108	7.06801	1.33476	1.53013	0.219794	-0.760693	down	-2.10896	down	K01867|1.5e-199|bna:106390850|K01867 tryptophanyl-tRNA synthetase [EC:6.1.1.2] | (RefSeq) tryptophan--tRNA ligase, chloroplastic/mitochondrial-like isoform X1	Aminoacyl-tRNA biosynthesis (ko00970)
gene_Bol028109	gene_Bol028109	LOC106336369	79.1169	51.4827	80.1014	7.48637	10.4886	13.1068	0.929775	3.07136	0.373316	-3.06026	down	-2.55057	down	K13447|0.0e+00|boe:106336369|K13447 respiratory burst oxidase [EC:1.6.3.- 1.11.1.-] | (RefSeq) respiratory burst oxidase homolog protein C	MAPK signaling pathway - plant (ko04016);; Plant-pathogen interaction (ko04626)
gene_Bol028154	gene_Bol028154	LOC106386102	32.3831	36.9939	24.5148	0.599114	0.839144	0.642282	0.128487	0.101442	0	-5.76302	down	-2.76627	down	K00975|1.3e-296|bna:106386102|K00975 glucose-1-phosphate adenylyltransferase [EC:2.7.7.27] | (RefSeq) glucose-1-phosphate adenylyltransferase small subunit, chloroplastic-like	Starch and sucrose metabolism (ko00500);; Amino sugar and nucleotide sugar metabolism (ko00520)
gene_Bol028163	gene_Bol028163	LOC106302101	2.45608	1.55109	2.29676	1.66833	1.20433	1.40064	0.44864	0.787353	0.2054	-0.856155	down	-1.22172	down	K01148|6.7e-230|boe:106302101|K01148 poly(A)-specific ribonuclease [EC:3.1.13.4] | (RefSeq) uncharacterized CRM domain-containing protein At3g25440, chloroplastic	RNA degradation (ko03018)
gene_Bol028196	gene_Bol028196	LOC106306848	46.7212	28.1865	26.8126	3.11956	3.45918	5.88726	1.64678	1.13442	0.590397	-3.31597	down	-1.53982	down	K01188|6.4e-151|thj:104802171|K01188 beta-glucosidase [EC:3.2.1.21] | (RefSeq) beta-glucosidase 3-like	Cyanoamino acid metabolism (ko00460);; Starch and sucrose metabolism (ko00500);; Phenylpropanoid biosynthesis (ko00940)
gene_Bol028344	gene_Bol028344	--	63.4167	111.358	84.3644	57.9026	58.0014	78.5883	37.0267	26.6892	6.05986	-0.722992	down	-1.19914	down	K02358|2.5e-259|bna:106360765|K02358 elongation factor Tu | (RefSeq) elongation factor Tu, chloroplastic	Plant-pathogen interaction (ko04626)
gene_Bol028366	gene_Bol028366	LOC106341495	50.6381	52.9434	58.0802	30.5329	27.7461	31.0327	12.0782	10.4084	13.4514	-1.15868	down	-0.85975	down	K19706|1.8e-141|boe:106341495|K19706 dihydroceramide fatty acyl 2-hydroxylase [EC:1.14.18.7] | (RefSeq) fatty acid 2-hydroxylase 2	--
gene_Bol028367	gene_Bol028367	LOC106325310	20.4477	12.3207	23.8798	9.88825	8.27966	9.53379	4.34202	4.98876	2.47484	-1.33406	down	-0.865565	down	--	--
gene_Bol028406	gene_Bol028406	LOC106406479	50.3764	121.326	103.524	52.003	56.3807	74.8475	23.1637	26.3655	3.47949	-0.901683	down	-1.52428	down	K08901|1.0e-120|bna:106406479|K08901 photosystem II oxygen-evolving enhancer protein 3 | (RefSeq) oxygen-evolving enhancer protein 3-1, chloroplastic-like	Photosynthesis (ko00195)
gene_Bol028417	gene_Bol028417	LOC111202186	14.9505	11.0324	15.2292	3.54732	2.06207	4.22119	0.123331	0.744584	0.887265	-2.37214	down	-1.95134	down	K09422|6.6e-196|bna:111202186|K09422 transcription factor MYB, plant | (RefSeq) transcription factor MYB102-like	--
gene_Bol028458	gene_Bol028458	LOC106318119	57.1574	60.5702	57.3952	42.7884	36.7692	52.0849	23.6849	29.5926	10.5939	-0.714959	down	-0.710385	down	K07305|7.7e-117|boe:106318119|K07305 peptide-methionine (R)-S-oxide reductase [EC:1.8.4.12] | (RefSeq) peptide methionine sulfoxide reductase B5-like isoform X1	--
[truncated: 381 more rows]
