# Supplementary material for: Transcriptome Analysis Reveals the Mechanism by Which Exogenous Melatonin Treatment Delays Leaf Senescence of Postharvest Chinese Kale (Brassica oleracea var. alboglabra)
Source: Int J Mol Sci. 2024 Feb 13;25(4):2250. doi: 10.3390/ijms25042250 (PMC10889248; doi:10.3390/ijms25042250)
Supplement: Supplementary file 1 [file ijms-25-02250-s001.zip › Di et al. Supplementary Table S2.xlsx]

## Sheet: Sheet 1
Supplementary Table 2 KEGG classification of continuously up and down-regulated DEGs during storage
Regulated (C0 vs C3 & C3 vs_C5)	KEGG Category	KEGG Sub-category	KEGG Pathway	Gene Count	K Number Count	Gene id	KEGG Orthology
Up	Cellular Processes	Transport and catabolism	Autophagy - other	14	10	gene_Bol005526;gene_Bol007057;gene_Bol010872;gene_Bol012036;gene_Bol014379;gene_Bol015601;gene_Bol017007;gene_Bol018055;gene_Bol019581;gene_Bol019812;gene_Bol022824;gene_Bol024280;gene_Bol033689;gene_Bol044578	K08269+K08341+K08334+K08341+K00914+K07203+K08343+K08330+K08333+K08339+K08337+K08341+K08330+K08269
			Endocytosis	9	5	gene_Bol012097;gene_Bol014334;gene_Bol024313;gene_Bol024435;gene_Bol029920;gene_Bol030586;gene_Bol041197;gene_Bol042930;gene_Bol043077	K10591+K00889+K12486+K07904+K07904+K12486+K12196+K07904+K07904
			Peroxisome	12	10	gene_Bol009996;gene_Bol010629;gene_Bol013702;gene_Bol014813;gene_Bol015928;gene_Bol018577;gene_Bol024996;gene_Bol025378;gene_Bol037024;gene_Bol037055;gene_Bol041052;gene_Bol043206	K13343+K11147+K00106+K00477+K00232+K05677+K00232+K13354+K07513+K11517+K00232+K13352
			Phagosome	1	1	gene_Bol014379	K00914
	Environmental Information Processing	Signal transduction	MAPK signaling pathway - plant	20	11	Brassica_oleracea_newGene_329;gene_Bol005993;gene_Bol009813;gene_Bol012362;gene_Bol015680;gene_Bol016824;gene_Bol018521;gene_Bol019499;gene_Bol019575;gene_Bol020355;gene_Bol020960;gene_Bol028763;gene_Bol030432;gene_Bol031296;gene_Bol031413;gene_Bol033793;gene_Bol035258;gene_Bol039200;gene_Bol042105;gene_Bol044848	K13449+K13416+K13416+K13420+K13416+K14497+K20557+K16224+K16224+K13424+K16224+K14509+K13424+K13416+K20559+K14497+K20718+K13416+K13426+K13424
			Phosphatidylinositol signaling system	8	5	gene_Bol014334;gene_Bol014379;gene_Bol015529;gene_Bol015681;gene_Bol018295;gene_Bol024590;gene_Bol040355;gene_Bol043772	K00889+K00914+K05857+K18081+K01099+K18081+K05857+K18081
			Plant hormone signal transduction	28	16	Brassica_oleracea_newGene_329;gene_Bol005993;gene_Bol009813;gene_Bol011719;gene_Bol013052;gene_Bol014260;gene_Bol015094;gene_Bol015457;gene_Bol015680;gene_Bol015777;gene_Bol016724;gene_Bol016824;gene_Bol023434;gene_Bol024689;gene_Bol026834;gene_Bol027526;gene_Bol028763;gene_Bol031296;gene_Bol031508;gene_Bol032376;gene_Bol033793;gene_Bol034886;gene_Bol037085;gene_Bol038057;gene_Bol038233;gene_Bol0…	K13449+K13416+K13416+K14432+K14487+K16189+K14488+K14493+K13416+K14491+K14487+K14497+K13946+K14488+K14486+K14431+K14509+K13416+K14491+K14491+K14497+K13415+K14500+K14491+K14488+K13416+K13415+K12126
		Membrane transport	ABC transporters	7	4	gene_Bol018577;gene_Bol020428;gene_Bol021813;gene_Bol024911;gene_Bol037722;gene_Bol038118;gene_Bol042223	K05677+K05658+K05658+K05643+K08712+K08712+K05658
	Genetic Information Processing	Folding, sorting and degradation	Proteasome	18	16	gene_Bol006864;gene_Bol008187;gene_Bol012594;gene_Bol015428;gene_Bol018012;gene_Bol019664;gene_Bol021522;gene_Bol023240;gene_Bol027786;gene_Bol031171;gene_Bol031410;gene_Bol035139;gene_Bol036235;gene_Bol036484;gene_Bol038517;gene_Bol039084;gene_Bol042891;gene_Bol044538	K02734+K03032+K11599+K03038+K02738+K03028+K02726+K02728+K02727+K02739+K02737+K03061+K03030+K02736+K02726+K02729+K02739+K02732
			Protein processing in endoplasmic reticulum	9	8	gene_Bol004674;gene_Bol006070;gene_Bol008182;gene_Bol009686;gene_Bol022139;gene_Bol022865;gene_Bol027549;gene_Bol033263;gene_Bol039198	K14011+K03347+K06689+K09580+K07953+K14018+K09580+K14016+K13993
			RNA degradation	6	6	gene_Bol005235;gene_Bol010229;gene_Bol013628;gene_Bol026144;gene_Bol034485;gene_Bol040245	K08311+K12616+K13126+K10643+K12580+K04077
			SNARE interactions in vesicular transport	1	1	gene_Bol009834	K08503
			Ubiquitin mediated proteolysis	10	9	gene_Bol006070;gene_Bol008182;gene_Bol011695;gene_Bol012097;gene_Bol029572;gene_Bol030518;gene_Bol031066;gene_Bol039821;gene_Bol040373;gene_Bol042782	K03347+K06689+K10260+K10591+K10576+K03364+K10614+K03875+K10599+K10614
		Replication and repair	Base excision repair	1	1	gene_Bol022048	K10773
			Homologous recombination	2	2	gene_Bol018236;gene_Bol026483	K10875+K10728
			Nucleotide excision repair	2	2	gene_Bol032835;gene_Bol045207	K10848+K03143
		Transcription	Basal transcription factors	2	2	gene_Bol012089;gene_Bol045207	K03138+K03143
			RNA polymerase	4	1	Brassica_oleracea_newGene_10467;Brassica_oleracea_newGene_3336;Brassica_oleracea_newGene_5004;gene_Bol016454	K03006+K03006+K03006+K03006
			Spliceosome	8	4	Brassica_oleracea_newGene_9947;gene_Bol006350;gene_Bol017341;gene_Bol027287;gene_Bol028114;gene_Bol032114;gene_Bol034214;gene_Bol040373	K12835+K12835+K12835+K12900+K12857+K12835+K12835+K10599
		Translation	Aminoacyl-tRNA biosynthesis	1	1	gene_Bol007926	K02433
			RNA transport	5	4	Brassica_oleracea_newGene_3567;gene_Bol013354;gene_Bol013628;gene_Bol022051;gene_Bol038524	K14297+K03257+K13126+K14297+K09291
			Ribosome	1	1	gene_Bol041200	K02952
			mRNA surveillance pathway	5	5	gene_Bol005049;gene_Bol006979;gene_Bol009216;gene_Bol013628;gene_Bol014777	K11584+K14411+K14396+K13126+K14400
	Metabolism	Amino acid metabolism	Alanine, aspartate and glutamate metabolism	6	4	gene_Bol011217;gene_Bol023248;gene_Bol024863;gene_Bol024864;gene_Bol029316;gene_Bol034760	K13051+K16871+K01953+K01953+K00814+K13051
			Arginine and proline metabolism	3	3	gene_Bol040145;gene_Bol041437;gene_Bol043031	K00318+K00472+K14329
			Arginine biosynthesis	1	1	gene_Bol029316	K00814
			Cysteine and methionine metabolism	8	7	gene_Bol013316;gene_Bol014705;gene_Bol014965;gene_Bol019668;gene_Bol021961;gene_Bol022276;gene_Bol029960;gene_Bol036768	K00640+K01738+K01919+K00815+K00826+K22207+K00831+K00826
			Glycine, serine and threonine metabolism	2	2	gene_Bol029960;gene_Bol038903	K00831+K01696
			Lysine degradation	1	1	gene_Bol013557	K14157
			Phenylalanine metabolism	1	1	gene_Bol019668	K00815
			Phenylalanine, tyrosine and tryptophan biosynthesis	5	5	gene_Bol005314;gene_Bol019668;gene_Bol038903;gene_Bol042502;gene_Bol044016	K01658+K00815+K01696+K01609+K01657
			Tryptophan metabolism	9	5	Brassica_oleracea_newGene_10242;gene_Bol018585;gene_Bol026200;gene_Bol028852;gene_Bol032767;gene_Bol033477;gene_Bol038764;gene_Bol038765;gene_Bol038767	K11817+K11812+K11821+K11812+K11812+K11818+K11819+K11819+K11819
			Tyrosine metabolism	1	1	gene_Bol019668	K00815
			Valine, leucine and isoleucine biosynthesis	2	1	gene_Bol021961;gene_Bol036768	K00826+K00826
			Valine, leucine and isoleucine degradation	7	6	gene_Bol007626;gene_Bol019329;gene_Bol021961;gene_Bol030790;gene_Bol036768;gene_Bol037024;gene_Bol041335	K00249+K00140+K00826+K00020+K00826+K07513+K00253
		Biosynthesis of other secondary metabolites	Benzoxazinoid biosynthesis	2	1	Brassica_oleracea_newGene_11740;Brassica_oleracea_newGene_2563	K13229+K13229
			Caffeine metabolism	1	1	gene_Bol013702	K00106
			Flavone and flavonol biosynthesis	1	1	gene_Bol004411	K22771
			Glucosinolate biosynthesis	10	5	gene_Bol018585;gene_Bol021961;gene_Bol026200;gene_Bol028852;gene_Bol032767;gene_Bol033477;gene_Bol036768;gene_Bol038764;gene_Bol038765;gene_Bol038767	K11812+K00826+K11821+K11812+K11812+K11818+K00826+K11819+K11819+K11819
			Indole alkaloid biosynthesis	1	1	gene_Bol039400	K01757
			Isoflavonoid biosynthesis	3	1	gene_Bol018620;gene_Bol028922;gene_Bol043644	K13260+K13260+K13260
			Isoquinoline alkaloid biosynthesis	2	2	gene_Bol019668;gene_Bol033799	K00815+K13396
			Monobactam biosynthesis	1	1	gene_Bol038597	K13811
			Phenylpropanoid biosynthesis	18	6	gene_Bol005510;gene_Bol013783;gene_Bol014175;gene_Bol015833;gene_Bol015835;gene_Bol020424;gene_Bol021927;gene_Bol023070;gene_Bol028905;gene_Bol029008;gene_Bol030088;gene_Bol031505;gene_Bol037384;gene_Bol038052;gene_Bol038832;gene_Bol038834;gene_Bol045599;gene_Bol045600	K00430+K05350+K13066+K00430+K00430+K18368+K00430+K01188+K00430+K09755+K01188+K00430+K00430+K00430+K13066+K13066+K01188+K01188
			Tropane, piperidine and pyridine alkaloid biosynthesis	3	2	gene_Bol017595;gene_Bol017597;gene_Bol019668	K08081+K08081+K00815
		Carbohydrate metabolism	Amino sugar and nucleotide sugar metabolism	5	4	gene_Bol009597;gene_Bol017622;gene_Bol021627;gene_Bol025939;gene_Bol042183	K01784+K00770+K01183+K08678+K08678
			Ascorbate and aldarate metabolism	3	3	Brassica_oleracea_newGene_7190;gene_Bol004907;gene_Bol039330	K00423+K00103+K21888
			Butanoate metabolism	1	1	gene_Bol023248	K16871
			Citrate cycle (TCA cycle)	7	5	gene_Bol008068;gene_Bol013730;gene_Bol015943;gene_Bol023762;gene_Bol029509;gene_Bol035555;gene_Bol044480	K01610+K00030+K01681+K01647+K01647+K00627+K01647
			Fructose and mannose metabolism	3	3	gene_Bol013510;gene_Bol038644;gene_Bol040742	K03841+K00863+K19355
			Galactose metabolism	3	3	gene_Bol005943;gene_Bol009597;gene_Bol010427	K12309+K01784+K01193
			Glycolysis / Gluconeogenesis	4	4	gene_Bol008068;gene_Bol013510;gene_Bol035555;gene_Bol038208	K01610+K03841+K00627+K00134
			Glyoxylate and dicarboxylate metabolism	7	4	gene_Bol015943;gene_Bol023762;gene_Bol023809;gene_Bol029509;gene_Bol037055;gene_Bol043918;gene_Bol044480	K01681+K01647+K22133+K01647+K11517+K22133+K01647
			Inositol phosphate metabolism	12	8	gene_Bol014334;gene_Bol014379;gene_Bol015529;gene_Bol015681;gene_Bol018295;gene_Bol019329;gene_Bol024590;gene_Bol025549;gene_Bol025649;gene_Bol040355;gene_Bol041113;gene_Bol043772	K00889+K00914+K05857+K18081+K01099+K00140+K18081+K24221+K24221+K05857+K01114+K18081
			Pentose and glucuronate interconversions	5	3	gene_Bol004677;gene_Bol030160;gene_Bol030161;gene_Bol031338;gene_Bol031340	K01184+K01051+K01051+K01728+K01728
			Pentose phosphate pathway	2	2	gene_Bol013510;gene_Bol022430	K03841+K01057
			Propanoate metabolism	4	2	gene_Bol015928;gene_Bol019329;gene_Bol024996;gene_Bol041052	K00232+K00140+K00232+K00232
			Pyruvate metabolism	2	2	gene_Bol008068;gene_Bol035555	K01610+K00627
			Starch and sucrose metabolism	15	9	Brassica_oleracea_newGene_5241;Brassica_oleracea_newGene_9655;gene_Bol008681;gene_Bol010366;gene_Bol010427;gene_Bol012795;gene_Bol013783;gene_Bol023070;gene_Bol027892;gene_Bol029372;gene_Bol030088;gene_Bol031569;gene_Bol036586;gene_Bol045599;gene_Bol045600	K00695+K01176+K16055+K19891+K01193+K01176+K05350+K01188+K01177+K01087+K01188+K01176+K16055+K01188+K01188
		Energy metabolism	Carbon fixation in photosynthetic organisms	4	4	gene_Bol008068;gene_Bol013510;gene_Bol029316;gene_Bol038208	K01610+K03841+K00814+K00134
			Nitrogen metabolism	1	1	gene_Bol004811	K02575
			Photosynthesis	1	1	gene_Bol032919	K02639
			Photosynthesis - antenna proteins	1	1	gene_Bol025385	K08915
			Sulfur metabolism	4	4	gene_Bol013316;gene_Bol014705;gene_Bol038597;gene_Bol042602	K00640+K01738+K13811+K00860
		Global and overview maps	2-Oxocarboxylic acid metabolism	16	9	gene_Bol013730;gene_Bol015943;gene_Bol018585;gene_Bol021961;gene_Bol023762;gene_Bol026200;gene_Bol028852;gene_Bol029316;gene_Bol029509;gene_Bol032767;gene_Bol033477;gene_Bol036768;gene_Bol038764;gene_Bol038765;gene_Bol038767;gene_Bol044480	K00030+K01681+K11812+K00826+K01647+K11821+K11812+K00814+K01647+K11812+K11818+K00826+K11819+K11819+K11819+K01647
			Biosynthesis of amino acids	18	14	gene_Bol005314;gene_Bol013316;gene_Bol013730;gene_Bol014705;gene_Bol015943;gene_Bol021961;gene_Bol023762;gene_Bol024863;gene_Bol024864;gene_Bol029316;gene_Bol029509;gene_Bol029960;gene_Bol036768;gene_Bol038208;gene_Bol038903;gene_Bol042502;gene_Bol044016;gene_Bol044480	K01658+K00640+K00030+K01738+K01681+K00826+K01647+K01953+K01953+K00814+K01647+K00831+K00826+K00134+K01696+K01609+K01657+K01647
			Carbon metabolism	20	16	gene_Bol008068;gene_Bol013316;gene_Bol013510;gene_Bol013730;gene_Bol014705;gene_Bol015928;gene_Bol015943;gene_Bol019329;gene_Bol022430;gene_Bol023762;gene_Bol024996;gene_Bol029316;gene_Bol029509;gene_Bol029960;gene_Bol035555;gene_Bol037055;gene_Bol038208;gene_Bol038644;gene_Bol041052;gene_Bol044480	K01610+K00640+K03841+K00030+K01738+K00232+K01681+K00140+K01057+K01647+K00232+K00814+K01647+K00831+K00627+K11517+K00134+K00863+K00232+K01647
			Fatty acid metabolism	6	4	gene_Bol007626;gene_Bol007628;gene_Bol015928;gene_Bol024996;gene_Bol037024;gene_Bol041052	K00249+K10527+K00232+K00232+K07513+K00232
		Glycan biosynthesis and metabolism	Glycosaminoglycan degradation	1	1	gene_Bol005943	K12309
			Glycosphingolipid biosynthesis - ganglio series	1	1	gene_Bol005943	K12309
			Glycosphingolipid biosynthesis - globo and isoglobo series	1	1	gene_Bol023058	K01988
			Glycosphingolipid biosynthesis - lacto and neolacto series	1	1	gene_Bol023058	K01988
			Glycosylphosphatidylinositol (GPI)-anchor biosynthesis	1	1	gene_Bol021199	K05286
			Other glycan degradation	3	3	gene_Bol005317;gene_Bol005943;gene_Bol015060	K01191+K12309+K17108
			Other types of O-glycan biosynthesis	1	1	gene_Bol007233	K18134
		Lipid metabolism	Arachidonic acid metabolism	4	2	gene_Bol005479;gene_Bol010012;gene_Bol028828;gene_Bol033584	K14674+K14674+K18592+K18592
			Biosynthesis of unsaturated fatty acids	4	2	gene_Bol015928;gene_Bol024996;gene_Bol037024;gene_Bol041052	K00232+K00232+K07513+K00232
			Cutin, suberine and wax biosynthesis	1	1	gene_Bol027110	K20769
			Ether lipid metabolism	6	3	Brassica_oleracea_newGene_7830;Brassica_oleracea_newGene_8523;gene_Bol005479;gene_Bol010012;gene_Bol029174;gene_Bol041113	K00993+K00993+K14674+K14674+K00993+K01114
			Fatty acid degradation	6	4	gene_Bol007626;gene_Bol007628;gene_Bol015928;gene_Bol024996;gene_Bol037024;gene_Bol041052	K00249+K10527+K00232+K00232+K07513+K00232
			Glycerolipid metabolism	9	7	gene_Bol005069;gene_Bol005479;gene_Bol007598;gene_Bol010012;gene_Bol011504;gene_Bol021450;gene_Bol035146;gene_Bol038644;gene_Bol039346	K00679+K14674+K13523+K14674+K09480+K00864+K00679+K00863+K13513
			Glycerophospholipid metabolism	16	9	Brassica_oleracea_newGene_7830;Brassica_oleracea_newGene_8523;gene_Bol005479;gene_Bol006932;gene_Bol007153;gene_Bol007598;gene_Bol010012;gene_Bol014643;gene_Bol020545;gene_Bol024360;gene_Bol029174;gene_Bol037159;gene_Bol038106;gene_Bol039346;gene_Bol041048;gene_Bol041113	K00993+K00993+K14674+K00006+K16818+K13523+K14674+K16818+K00006+K22389+K00993+K16818+K08730+K13513+K16818+K01114
			Linoleic acid metabolism	3	2	gene_Bol005479;gene_Bol010012;gene_Bol027861	K14674+K14674+K00454
			Sphingolipid metabolism	4	4	gene_Bol005943;gene_Bol008436;gene_Bol011944;gene_Bol015060	K12309+K01634+K04718+K17108
			Steroid biosynthesis	6	4	gene_Bol005479;gene_Bol009955;gene_Bol010012;gene_Bol015088;gene_Bol016483;gene_Bol027351	K14674+K00511+K14674+K08246+K00511+K09832
			alpha-Linolenic acid metabolism	13	7	gene_Bol005479;gene_Bol007153;gene_Bol007628;gene_Bol010012;gene_Bol014643;gene_Bol015928;gene_Bol024360;gene_Bol024996;gene_Bol027861;gene_Bol037024;gene_Bol037159;gene_Bol041048;gene_Bol041052	K14674+K16818+K10527+K14674+K16818+K00232+K22389+K00232+K00454+K07513+K16818+K16818+K00232
		Metabolism of cofactors and vitamins	Biotin metabolism	1	1	gene_Bol039152	K19562
			Nicotinate and nicotinamide metabolism	2	2	gene_Bol034850;gene_Bol035174	K03787+K01950
			Pantothenate and CoA biosynthesis	2	1	gene_Bol021961;gene_Bol036768	K00826+K00826
			Riboflavin metabolism	2	1	gene_Bol030886;gene_Bol030887	K14379+K14379
			Ubiquinone and other terpenoid-quinone biosynthesis	2	2	gene_Bol018262;gene_Bol019668	K03809+K00815
			Vitamin B6 metabolism	1	1	gene_Bol029960	K00831
		Metabolism of other amino acids	Cyanoamino acid metabolism	11	6	gene_Bol011217;gene_Bol013783;gene_Bol018638;gene_Bol023070;gene_Bol028828;gene_Bol030088;gene_Bol033584;gene_Bol034760;gene_Bol036051;gene_Bol045599;gene_Bol045600	K13051+K05350+K20802+K01188+K18592+K01188+K18592+K13051+K13035+K01188+K01188
			Glutathione metabolism	9	5	gene_Bol009789;gene_Bol014965;gene_Bol028828;gene_Bol032956;gene_Bol032957;gene_Bol033584;gene_Bol039330;gene_Bol039366;gene_Bol042425	K00799+K01919+K18592+K00799+K00799+K18592+K21888+K00799+K00383
			Phosphonate and phosphinate metabolism	3	1	Brassica_oleracea_newGene_7830;Brassica_oleracea_newGene_8523;gene_Bol029174	K00993+K00993+K00993
			Selenocompound metabolism	1	1	gene_Bol038597	K13811
			Taurine and hypotaurine metabolism	2	1	gene_Bol028828;gene_Bol033584	K18592+K18592
			beta-Alanine metabolism	4	2	gene_Bol015928;gene_Bol019329;gene_Bol024996;gene_Bol041052	K00232+K00140+K00232+K00232
		Metabolism of terpenoids and polyketides	Carotenoid biosynthesis	2	2	gene_Bol005615;gene_Bol045762	K09843+K09841
			Sesquiterpenoid and triterpenoid biosynthesis	2	1	gene_Bol009955;gene_Bol016483	K00511+K00511
			Zeatin biosynthesis	2	2	gene_Bol022730;gene_Bol044004	K00279+K13493
		Nucleotide metabolism	Purine metabolism	7	7	gene_Bol009551;gene_Bol013702;gene_Bol015972;gene_Bol034850;gene_Bol038372;gene_Bol038597;gene_Bol042602	K01510+K00106+K01945+K03787+K00759+K13811+K00860
			Pyrimidine metabolism	2	2	gene_Bol009551;gene_Bol034850	K01510+K03787
	Organismal Systems	Environmental adaptation	Circadian rhythm - plant	2	2	gene_Bol022421;gene_Bol045781	K12130+K12126
			Plant-pathogen interaction	40	20	Brassica_oleracea_newGene_329;Brassica_oleracea_newGene_4461;Brassica_oleracea_newGene_7776;gene_Bol005993;gene_Bol006381;gene_Bol007568;gene_Bol009729;gene_Bol009813;gene_Bol012362;gene_Bol015680;gene_Bol016037;gene_Bol016038;gene_Bol019499;gene_Bol019575;gene_Bol020355;gene_Bol020960;gene_Bol021450;gene_Bol023866;gene_Bol023868;gene_Bol023890;gene_Bol027566;gene_Bol027947;gene_Bol028192;gene_Bo…	K13449+K13459+K13460+K13416+K13448+K13412+K13430+K13416+K13420+K13416+K01373+K01373+K16224+K16224+K13424+K16224+K00864+K16225+K16226+K18834+K13430+K13430+K13456+K01373+K13448+K13424+K05391+K13416+K13448+K05391+K13428+K13459+K13430+K16226+K13436+K13416+K13430+K13426+K13424+K05391
Down	Cellular Processes	Transport and catabolism	Endocytosis	8	5	gene_Bol015215;gene_Bol022335;gene_Bol029293;gene_Bol029985;gene_Bol031875;gene_Bol034730;gene_Bol036158;gene_Bol043675	K11827+K12472+K07904+K07904+K12189+K01115+K12472+K07904
			Peroxisome	8	7	Brassica_oleracea_newGene_3854;gene_Bol009975;gene_Bol025833;gene_Bol032887;gene_Bol035580;gene_Bol037212;gene_Bol039160;gene_Bol042574	K11517+K01897+K13356+K01640+K11517+K08726+K13348+K00830
			Phagosome	6	2	gene_Bol017617;gene_Bol019439;gene_Bol027385;gene_Bol028789;gene_Bol033869;gene_Bol043509	K07375+K07375+K07375+K02155+K07375+K07375
	Environmental Information Processing	Signal transduction	MAPK signaling pathway - plant	13	9	Brassica_oleracea_newGene_10323;Brassica_oleracea_newGene_11725;gene_Bol006808;gene_Bol017544;gene_Bol017921;gene_Bol026296;gene_Bol026606;gene_Bol028109;gene_Bol030665;gene_Bol032113;gene_Bol039793;gene_Bol042123;gene_Bol042830	K16224+K16224+K00940+K17686+K13416+K13416+K14498+K13447+K13414+K13420+K20718+K13416+K13416
			Phosphatidylinositol signaling system	6	2	gene_Bol004899;gene_Bol008838;gene_Bol011472;gene_Bol020992;gene_Bol021806;gene_Bol022840	K01092+K00901+K01092+K00901+K01092+K00901
			Plant hormone signal transduction	24	12	gene_Bol004667;gene_Bol005860;gene_Bol006593;gene_Bol007343;gene_Bol010742;gene_Bol011497;gene_Bol013150;gene_Bol014767;gene_Bol017921;gene_Bol018355;gene_Bol018868;gene_Bol023158;gene_Bol026296;gene_Bol026606;gene_Bol026849;gene_Bol027130;gene_Bol033111;gene_Bol036020;gene_Bol038615;gene_Bol039308;gene_Bol042123;gene_Bol042392;gene_Bol042830;gene_Bol044486	K14494+K14491+K12126+K14491+K12126+K14500+K14503+K14491+K13416+K14484+K14494+K14491+K13416+K14498+K14503+K13415+K14494+K13463+K14484+K14488+K13416+K14484+K13416+K16189
		Membrane transport	ABC transporters	5	3	gene_Bol013247;gene_Bol016256;gene_Bol019650;gene_Bol026471;gene_Bol031593	K05681+K05681+K05663+K08712+K05681
	Genetic Information Processing	Folding, sorting and degradation	Proteasome	2	2	gene_Bol032992;gene_Bol033716	K06699+K02738
			Protein export	3	3	gene_Bol010019;gene_Bol032371;gene_Bol043606	K03106+K03116+K09647
			Protein processing in endoplasmic reticulum	2	2	gene_Bol004832;gene_Bol032573	K04374+K09487
			RNA degradation	8	3	gene_Bol009919;gene_Bol013334;gene_Bol028163;gene_Bol033615;gene_Bol035210;gene_Bol037019;gene_Bol040234;gene_Bol042428	K04077+K04077+K01148+K01148+K04077+K04077+K07573+K04077
			Ubiquitin mediated proteolysis	1	1	gene_Bol034255	K03364
		Replication and repair	Base excision repair	2	2	gene_Bol011740;gene_Bol030954	K10773+K03648
			DNA replication	2	2	gene_Bol009373;gene_Bol024389	K10755+K07466
			Homologous recombination	3	2	gene_Bol022411;gene_Bol024389;gene_Bol027541	K12173+K07466+K12173
			Mismatch repair	2	2	gene_Bol009373;gene_Bol024389	K10755+K07466
			Nucleotide excision repair	3	3	gene_Bol009373;gene_Bol024389;gene_Bol026328	K10755+K07466+K10844
		Transcription	Basal transcription factors	1	1	gene_Bol026328	K10844
			Spliceosome	4	4	gene_Bol005418;gene_Bol014228;gene_Bol019851;gene_Bol041108	K12827+K12846+K12811+K12834
		Translation	Aminoacyl-tRNA biosynthesis	9	8	gene_Bol005254;gene_Bol019853;gene_Bol027430;gene_Bol028034;gene_Bol032584;gene_Bol037692;gene_Bol040386;gene_Bol041220;gene_Bol042528	K01880+K01873+K01883+K01867+K02433+K01872+K04567+K01872+K01868
			RNA transport	2	2	gene_Bol017261;gene_Bol025226	K03539+K14292
			Ribosome	57	42	gene_Bol006332;gene_Bol006514;gene_Bol007882;gene_Bol007979;gene_Bol008609;gene_Bol008913;gene_Bol009212;gene_Bol009269;gene_Bol010344;gene_Bol010770;gene_Bol011127;gene_Bol011485;gene_Bol013237;gene_Bol013681;gene_Bol014478;gene_Bol018253;gene_Bol018276;gene_Bol018603;gene_Bol018709;gene_Bol018886;gene_Bol018927;gene_Bol020534;gene_Bol021222;gene_Bol021269;gene_Bol021664;gene_Bol021878;gene_Bol0…	K02874+K02957+K02884+K02898+K02879+K02957+K02904+K02906+K02989+K02931+K02968+K02931+K02995+K02959+K02863+K02895+K02884+K02935+K02867+K02961+K02884+K02981+K02997+K02993+K02937+K02881+K02873+K02898+K02867+K02870+K02971+K02879+K02870+K02880+K02998+K02871+K02952+K02923+K02996+K02935+K02945+K02876+K02978+K02952+K02946+K02988+K02902+K02906+K02998+K02933+K02926+K02957+K02932+K02876+K02952+K02916+K02903
			Ribosome biogenesis in eukaryotes	6	6	gene_Bol007639;gene_Bol015981;gene_Bol017261;gene_Bol022352;gene_Bol029206;gene_Bol029497	K14538+K14548+K03539+K03097+K14573+K14574
			mRNA surveillance pathway	2	2	gene_Bol016202;gene_Bol017791	K06269+K14396
	Metabolism	Amino acid metabolism	Alanine, aspartate and glutamate metabolism	8	7	gene_Bol009419;gene_Bol012554;gene_Bol014032;gene_Bol018848;gene_Bol023919;gene_Bol033016;gene_Bol040288;gene_Bol042574	K01756+K01580+K01915+K00609+K01956+K14272+K01915+K00830
			Arginine and proline metabolism	7	3	Brassica_oleracea_newGene_8598;gene_Bol005766;gene_Bol013646;gene_Bol013647;gene_Bol014895;gene_Bol018671;gene_Bol022977	K01583+K00128+K00128+K00128+K01426+K00128+K00128
			Arginine biosynthesis	3	2	gene_Bol014032;gene_Bol033016;gene_Bol040288	K01915+K14272+K01915
			Cysteine and methionine metabolism	8	7	gene_Bol013168;gene_Bol021644;gene_Bol024617;gene_Bol026715;gene_Bol028702;gene_Bol029227;gene_Bol034468;gene_Bol037342	K00789+K01738+K00026+K00026+K01251+K00133+K00549+K00826
			Glycine, serine and threonine metabolism	9	7	gene_Bol014182;gene_Bol020900;gene_Bol024073;gene_Bol027824;gene_Bol029227;gene_Bol031329;gene_Bol033016;gene_Bol033425;gene_Bol042574	K02437+K02437+K15893+K15893+K00133+K00605+K14272+K00600+K00830
			Histidine metabolism	5	1	gene_Bol005766;gene_Bol013646;gene_Bol013647;gene_Bol018671;gene_Bol022977	K00128+K00128+K00128+K00128+K00128
			Lysine biosynthesis	1	1	gene_Bol029227	K00133
			Lysine degradation	6	2	gene_Bol005766;gene_Bol013646;gene_Bol013647;gene_Bol018671;gene_Bol022977;gene_Bol032313	K00128+K00128+K00128+K00128+K00128+K00626
			Phenylalanine metabolism	2	2	gene_Bol014895;gene_Bol025522	K01426+K10775
			Phenylalanine, tyrosine and tryptophan biosynthesis	1	1	gene_Bol037805	K00891
			Tryptophan metabolism	8	4	gene_Bol005766;gene_Bol013646;gene_Bol013647;gene_Bol014895;gene_Bol018671;gene_Bol022977;gene_Bol025706;gene_Bol032313	K00128+K00128+K00128+K01426+K00128+K00128+K01237+K00626
			Valine, leucine and isoleucine biosynthesis	2	2	gene_Bol028674;gene_Bol037342	K01687+K00826
			Valine, leucine and isoleucine degradation	10	6	gene_Bol005766;gene_Bol013646;gene_Bol013647;gene_Bol015067;gene_Bol018671;gene_Bol022977;gene_Bol032313;gene_Bol032887;gene_Bol036842;gene_Bol037342	K00128+K00128+K00128+K01968+K00128+K00128+K00626+K01640+K05605+K00826
		Biosynthesis of other secondary metabolites	Betalain biosynthesis	2	1	gene_Bol012141;gene_Bol030439	K15777+K15777
			Flavonoid biosynthesis	1	1	gene_Bol020585	K09754
			Glucosinolate biosynthesis	1	1	gene_Bol037342	K00826
			Monobactam biosynthesis	1	1	gene_Bol029227	K00133
			Phenylpropanoid biosynthesis	10	7	Brassica_oleracea_newGene_8350;gene_Bol016216;gene_Bol020434;gene_Bol020585;gene_Bol025522;gene_Bol025970;gene_Bol027968;gene_Bol028196;gene_Bol036888;gene_Bol038389	K01188+K09753+K09753+K09754+K10775+K01188+K13066+K01188+K00430+K01904
			Stilbenoid, diarylheptanoid and gingerol biosynthesis	1	1	gene_Bol020585	K09754
			Tropane, piperidine and pyridine alkaloid biosynthesis	1	1	gene_Bol029656	K08081
		Carbohydrate metabolism	Amino sugar and nucleotide sugar metabolism	10	6	Brassica_oleracea_newGene_11980;gene_Bol025172;gene_Bol026140;gene_Bol028154;gene_Bol028700;gene_Bol029470;gene_Bol030211;gene_Bol036893;gene_Bol039352;gene_Bol042416	K01183+K00847+K00966+K00975+K08679+K01183+K17497+K00847+K00966+K08679
			Ascorbate and aldarate metabolism	8	3	gene_Bol005766;gene_Bol013646;gene_Bol013647;gene_Bol018671;gene_Bol022977;gene_Bol025609;gene_Bol026873;gene_Bol042680	K00128+K00128+K00128+K00128+K00128+K00434+K21888+K00434
			Butanoate metabolism	3	3	gene_Bol012554;gene_Bol032313;gene_Bol032887	K01580+K00626+K01640
			Citrate cycle (TCA cycle)	5	3	gene_Bol014347;gene_Bol018445;gene_Bol024617;gene_Bol026715;gene_Bol032355	K01648+K00161+K00026+K00026+K01648
			Fructose and mannose metabolism	15	7	gene_Bol006726;gene_Bol006738;gene_Bol016047;gene_Bol018526;gene_Bol021886;gene_Bol025168;gene_Bol025172;gene_Bol026140;gene_Bol028791;gene_Bol030211;gene_Bol036893;gene_Bol039352;gene_Bol039645;gene_Bol045872;gene_Bol045882	K01623+K01803+K01623+K01623+K00863+K03841+K00847+K00966+K01623+K17497+K00847+K00966+K01623+K01623+K01803
			Galactose metabolism	2	2	gene_Bol008379;gene_Bol024580	K12309+K07407
			Glycolysis / Gluconeogenesis	20	8	gene_Bol005766;gene_Bol006726;gene_Bol006738;gene_Bol007345;gene_Bol010267;gene_Bol012226;gene_Bol013646;gene_Bol013647;gene_Bol016047;gene_Bol018445;gene_Bol018526;gene_Bol018671;gene_Bol022977;gene_Bol025168;gene_Bol028791;gene_Bol035489;gene_Bol039645;gene_Bol045780;gene_Bol045872;gene_Bol045882	K00128+K01623+K01803+K00927+K00927+K01792+K00128+K00128+K01623+K00161+K01623+K00128+K00128+K03841+K01623+K00927+K01623+K00131+K01623+K01803
			Glyoxylate and dicarboxylate metabolism	20	13	Brassica_oleracea_newGene_3854;gene_Bol010004;gene_Bol014032;gene_Bol014182;gene_Bol020900;gene_Bol024073;gene_Bol024617;gene_Bol026715;gene_Bol027824;gene_Bol031329;gene_Bol032313;gene_Bol033016;gene_Bol033425;gene_Bol035580;gene_Bol040165;gene_Bol040168;gene_Bol040169;gene_Bol040256;gene_Bol040288;gene_Bol042574	K11517+K00284+K01915+K02437+K02437+K15893+K00026+K00026+K15893+K00605+K00626+K14272+K00600+K11517+K01602+K01602+K01602+K19269+K01915+K00830
			Inositol phosphate metabolism	5	2	gene_Bol004899;gene_Bol006738;gene_Bol011472;gene_Bol021806;gene_Bol045882	K01092+K01803+K01092+K01092+K01803
			Pentose and glucuronate interconversions	11	5	gene_Bol006676;gene_Bol017020;gene_Bol022847;gene_Bol022969;gene_Bol023152;gene_Bol023155;gene_Bol031310;gene_Bol033059;gene_Bol039085;gene_Bol039211;gene_Bol042220	K01051+K01783+K01728+K01213+K01051+K01051+K01051+K01184+K01051+K01051+K01051
			Pentose phosphate pathway	10	5	gene_Bol006726;gene_Bol014038;gene_Bol016047;gene_Bol017020;gene_Bol018526;gene_Bol025168;gene_Bol028791;gene_Bol039645;gene_Bol045780;gene_Bol045872	K01623+K00036+K01623+K01783+K01623+K03841+K01623+K01623+K00131+K01623
			Propanoate metabolism	4	4	gene_Bol020321;gene_Bol021283;gene_Bol032313;gene_Bol036842	K01962+K02160+K00626+K05605
			Pyruvate metabolism	16	9	gene_Bol005766;gene_Bol008622;gene_Bol013646;gene_Bol013647;gene_Bol015545;gene_Bol018445;gene_Bol018671;gene_Bol020321;gene_Bol021283;gene_Bol022977;gene_Bol024617;gene_Bol025985;gene_Bol026715;gene_Bol032313;gene_Bol037941;gene_Bol041183	K00128+K18881+K00128+K00128+K00051+K00161+K00128+K01962+K02160+K00128+K00026+K00051+K00026+K00626+K01759+K01759
			Starch and sucrose metabolism	12	8	Brassica_oleracea_newGene_8350;gene_Bol010041;gene_Bol011065;gene_Bol014796;gene_Bol025172;gene_Bol025970;gene_Bol027708;gene_Bol028154;gene_Bol028196;gene_Bol030751;gene_Bol036893;gene_Bol037770	K01188+K00700+K19892+K19891+K00847+K01188+K01179+K00975+K01188+K19891+K00847+K07024
		Energy metabolism	Carbon fixation in photosynthetic organisms	27	12	gene_Bol006726;gene_Bol006738;gene_Bol007345;gene_Bol010267;gene_Bol014048;gene_Bol015545;gene_Bol016047;gene_Bol017020;gene_Bol018526;gene_Bol022267;gene_Bol024617;gene_Bol025168;gene_Bol025985;gene_Bol026715;gene_Bol028791;gene_Bol031102;gene_Bol031393;gene_Bol033016;gene_Bol033485;gene_Bol035489;gene_Bol039645;gene_Bol040165;gene_Bol040168;gene_Bol040169;gene_Bol044241;gene_Bol045872;gene_Bol0…	K01623+K01803+K00927+K00927+K00855+K00051+K01623+K01783+K01623+K00855+K00026+K03841+K00051+K00026+K01623+K05298+K05298+K14272+K05298+K00927+K01623+K01602+K01602+K01602+K01100+K01623+K01803
			Nitrogen metabolism	6	4	gene_Bol010004;gene_Bol014032;gene_Bol021320;gene_Bol027537;gene_Bol027538;gene_Bol040288	K00284+K01915+K00366+K10534+K10534+K01915
			Oxidative phosphorylation	8	7	gene_Bol004602;gene_Bol017929;gene_Bol025633;gene_Bol025645;gene_Bol028789;gene_Bol032680;gene_Bol042205;gene_Bol045773	K02115+K02109+K03884+K02113+K02155+K02115+K03955+K01535
			Photosynthesis	46	22	gene_Bol004602;gene_Bol006085;gene_Bol006123;gene_Bol006547;gene_Bol006697;gene_Bol010475;gene_Bol011216;gene_Bol013327;gene_Bol014184;gene_Bol014324;gene_Bol014704;gene_Bol016111;gene_Bol017929;gene_Bol018642;gene_Bol019273;gene_Bol019293;gene_Bol019477;gene_Bol019637;gene_Bol021119;gene_Bol021533;gene_Bol023353;gene_Bol023600;gene_Bol023613;gene_Bol025645;gene_Bol026114;gene_Bol026426;gene_Bol0…	K02115+K02692+K02636+K14332+K02721+K02723+K02695+K08905+K02639+K02639+K02639+K02698+K02109+K02716+K02716+K02641+K02695+K02693+K02693+K03541+K02717+K02641+K02638+K02113+K02723+K02639+K02638+K02716+K02723+K08901+K02636+K08901+K02115+K02721+K03542+K02699+K02695+K08905+K03541+K08905+K02699+K08902+K02717+K14332+K02717+K03542
			Photosynthesis - antenna proteins	23	10	gene_Bol005249;gene_Bol005250;gene_Bol007720;gene_Bol008547;gene_Bol008638;gene_Bol009860;gene_Bol012796;gene_Bol020853;gene_Bol022501;gene_Bol024878;gene_Bol025670;gene_Bol027347;gene_Bol027348;gene_Bol030347;gene_Bol031184;gene_Bol032230;gene_Bol037866;gene_Bol038173;gene_Bol038846;gene_Bol042537;gene_Bol042916;gene_Bol044323;gene_Bol045656	K08912+K08912+K08916+K08912+K08907+K08917+K08915+K08916+K08912+K08910+K08916+K08912+K08912+K08909+K08913+K08913+K08912+K08917+K08914+K08913+K08913+K08907+K08908
			Sulfur metabolism	2	2	gene_Bol009977;gene_Bol021644	K17285+K01738
		Global and overview maps	2-Oxocarboxylic acid metabolism	4	4	gene_Bol028674;gene_Bol029227;gene_Bol033016;gene_Bol037342	K01687+K00133+K14272+K00826
			Biosynthesis of amino acids	23	14	gene_Bol006726;gene_Bol006738;gene_Bol007345;gene_Bol010267;gene_Bol013168;gene_Bol014032;gene_Bol016047;gene_Bol017020;gene_Bol018526;gene_Bol021644;gene_Bol028674;gene_Bol028791;gene_Bol029227;gene_Bol033016;gene_Bol033425;gene_Bol034468;gene_Bol035489;gene_Bol037342;gene_Bol037805;gene_Bol039645;gene_Bol040288;gene_Bol045872;gene_Bol045882	K01623+K01803+K00927+K00927+K00789+K01915+K01623+K01783+K01623+K01738+K01687+K01623+K00133+K14272+K00600+K00549+K00927+K00826+K00891+K01623+K01915+K01623+K01803
			Carbon metabolism	47	29	Brassica_oleracea_newGene_3854;gene_Bol006726;gene_Bol006738;gene_Bol007345;gene_Bol010267;gene_Bol014038;gene_Bol014048;gene_Bol014182;gene_Bol015545;gene_Bol016047;gene_Bol017020;gene_Bol018445;gene_Bol018526;gene_Bol020321;gene_Bol020900;gene_Bol021283;gene_Bol021644;gene_Bol021886;gene_Bol022267;gene_Bol024073;gene_Bol024617;gene_Bol025168;gene_Bol025985;gene_Bol026715;gene_Bol027824;gene_Bol…	K11517+K01623+K01803+K00927+K00927+K00036+K00855+K02437+K00051+K01623+K01783+K00161+K01623+K01962+K02437+K02160+K01738+K00863+K00855+K15893+K00026+K03841+K00051+K00026+K15893+K01623+K05298+K00605+K05298+K00626+K14272+K00600+K05298+K00927+K11517+K05605+K01623+K01602+K01602+K01602+K19269+K00830+K01100+K00297+K00131+K01623+K01803
			Fatty acid metabolism	7	6	gene_Bol009975;gene_Bol020321;gene_Bol021283;gene_Bol029476;gene_Bol030021;gene_Bol032313;gene_Bol043655	K01897+K01962+K02160+K03921+K03921+K00626+K10703
		Glycan biosynthesis and metabolism	Glycosaminoglycan degradation	1	1	gene_Bol008379	K12309
			Glycosphingolipid biosynthesis - ganglio series	1	1	gene_Bol008379	K12309
			Glycosphingolipid biosynthesis - globo and isoglobo series	1	1	gene_Bol024580	K07407
			Glycosylphosphatidylinositol (GPI)-anchor biosynthesis	1	1	gene_Bol034307	K03860
			N-Glycan biosynthesis	1	1	gene_Bol038260	K03844
			Other glycan degradation	1	1	gene_Bol008379	K12309
			Various types of N-glycan biosynthesis	1	1	gene_Bol038260	K03844
		Lipid metabolism	Arachidonic acid metabolism	2	2	gene_Bol037212;gene_Bol044669	K08726+K00432
			Biosynthesis of unsaturated fatty acids	3	2	gene_Bol029476;gene_Bol030021;gene_Bol043655	K03921+K03921+K10703
			Cutin, suberine and wax biosynthesis	6	5	gene_Bol011517;gene_Bol012187;gene_Bol016302;gene_Bol025833;gene_Bol037414;gene_Bol040682	K15398+K15404+K15405+K13356+K15400+K15398
			Ether lipid metabolism	1	1	gene_Bol034730	K01115
			Fatty acid biosynthesis	5	4	gene_Bol009975;gene_Bol020321;gene_Bol021283;gene_Bol029476;gene_Bol030021	K01897+K01962+K02160+K03921+K03921
			Fatty acid degradation	7	3	gene_Bol005766;gene_Bol009975;gene_Bol013646;gene_Bol013647;gene_Bol018671;gene_Bol022977;gene_Bol032313	K00128+K01897+K00128+K00128+K00128+K00128+K00626
			Fatty acid elongation	3	2	gene_Bol018447;gene_Bol031851;gene_Bol043655	K15397+K15397+K10703
			Glycerolipid metabolism	18	7	gene_Bol005766;gene_Bol007166;gene_Bol008564;gene_Bol008838;gene_Bol011515;gene_Bol013646;gene_Bol013647;gene_Bol018471;gene_Bol018671;gene_Bol020992;gene_Bol021886;gene_Bol022840;gene_Bol022977;gene_Bol024580;gene_Bol027270;gene_Bol032018;gene_Bol035149;gene_Bol040681	K00128+K00679+K00679+K00901+K13508+K00128+K00128+K13508+K00128+K00901+K00863+K00901+K00128+K07407+K00655+K00679+K00679+K13508
			Glycerophospholipid metabolism	9	5	gene_Bol008838;gene_Bol011515;gene_Bol018471;gene_Bol020992;gene_Bol022840;gene_Bol027270;gene_Bol034730;gene_Bol040347;gene_Bol040681	K00901+K13508+K13508+K00901+K00901+K00655+K01115+K16818+K13508
			Linoleic acid metabolism	1	1	gene_Bol023261	K15718
			Sphingolipid metabolism	2	2	gene_Bol008379;gene_Bol024580	K12309+K07407
			Steroid biosynthesis	1	1	gene_Bol023384	K14424
			Synthesis and degradation of ketone bodies	2	2	gene_Bol032313;gene_Bol032887	K00626+K01640
			alpha-Linolenic acid metabolism	1	1	gene_Bol040347	K16818
		Metabolism of cofactors and vitamins	Folate biosynthesis	1	1	gene_Bol006352	K15631
			One carbon pool by folate	3	3	gene_Bol031329;gene_Bol033425;gene_Bol044510	K00605+K00600+K00297
			Pantothenate and CoA biosynthesis	7	3	gene_Bol005766;gene_Bol013646;gene_Bol013647;gene_Bol018671;gene_Bol022977;gene_Bol028674;gene_Bol037342	K00128+K00128+K00128+K00128+K00128+K01687+K00826
			Porphyrin and chlorophyll metabolism	16	11	gene_Bol009411;gene_Bol011626;gene_Bol013070;gene_Bol014747;gene_Bol016274;gene_Bol024995;gene_Bol026165;gene_Bol034245;gene_Bol038250;gene_Bol039373;gene_Bol039548;gene_Bol040837;gene_Bol041219;gene_Bol042336;gene_Bol044633;gene_Bol045473	K03405+K00218+K00218+K04040+K02492+K04040+K10960+K03403+K01845+K10960+K13071+K00218+K03404+K00218+K01772+K04035
			Riboflavin metabolism	2	2	gene_Bol035650;gene_Bol037440	K14394+K20884
			Thiamine metabolism	7	5	gene_Bol018246;gene_Bol021078;gene_Bol026087;gene_Bol027018;gene_Bol027936;gene_Bol032300;gene_Bol035650	K03146+K22911+K06949+K00939+K03146+K00939+K14394
			Ubiquinone and other terpenoid-quinone biosynthesis	3	3	gene_Bol010807;gene_Bol017567;gene_Bol038389	K12502+K19222+K01904
			Vitamin B6 metabolism	2	2	gene_Bol025285;gene_Bol030328	K06215+K05275
		Metabolism of other amino acids	Cyanoamino acid metabolism	4	2	Brassica_oleracea_newGene_8350;gene_Bol025970;gene_Bol028196;gene_Bol033425	K01188+K01188+K01188+K00600
			Glutathione metabolism	8	6	gene_Bol014038;gene_Bol021558;gene_Bol025609;gene_Bol026873;gene_Bol029634;gene_Bol030122;gene_Bol042680;gene_Bol044669	K00036+K00799+K00434+K21888+K00799+K01255+K00434+K00432
			Selenocompound metabolism	1	1	gene_Bol034468	K00549
			Taurine and hypotaurine metabolism	1	1	gene_Bol012554	K01580
			beta-Alanine metabolism	7	3	gene_Bol005766;gene_Bol012554;gene_Bol013646;gene_Bol013647;gene_Bol018671;gene_Bol022977;gene_Bol036842	K00128+K01580+K00128+K00128+K00128+K00128+K05605
		Metabolism of terpenoids and polyketides	Carotenoid biosynthesis	4	4	gene_Bol027222;gene_Bol039202;gene_Bol039555;gene_Bol041221	K09838+K15748+K15746+K09839
			Limonene and pinene degradation	5	1	gene_Bol005766;gene_Bol013646;gene_Bol013647;gene_Bol018671;gene_Bol022977	K00128+K00128+K00128+K00128+K00128
			Monoterpenoid biosynthesis	1	1	gene_Bol045642	K15095
			Terpenoid backbone biosynthesis	6	5	gene_Bol014868;gene_Bol026165;gene_Bol027375;gene_Bol032313;gene_Bol038277;gene_Bol039373	K00787+K10960+K14066+K00626+K05356+K10960
			Zeatin biosynthesis	1	1	gene_Bol030410	K13496
		Nucleotide metabolism	Purine metabolism	7	6	gene_Bol006808;gene_Bol009419;gene_Bol015310;gene_Bol027018;gene_Bol031590;gene_Bol032300;gene_Bol038212	K00940+K01756+K00856+K00939+K01923+K00939+K00088
			Pyrimidine metabolism	3	3	gene_Bol006808;gene_Bol018848;gene_Bol023919	K00940+K00609+K01956
	Organismal Systems	Environmental adaptation	Circadian rhythm - plant	13	8	gene_Bol004898;gene_Bol006593;gene_Bol008817;gene_Bol010742;gene_Bol011142;gene_Bol021803;gene_Bol022352;gene_Bol022384;gene_Bol024579;gene_Bol036182;gene_Bol036251;gene_Bol036891;gene_Bol043799	K12134+K12126+K16221+K12126+K16240+K12128+K03097+K12135+K16221+K12135+K16221+K12121+K16221
			Plant-pathogen interaction	23	15	Brassica_oleracea_newGene_10323;Brassica_oleracea_newGene_11725;gene_Bol015912;gene_Bol017921;gene_Bol018447;gene_Bol018715;gene_Bol019884;gene_Bol024337;gene_Bol024895;gene_Bol026296;gene_Bol028109;gene_Bol028344;gene_Bol028711;gene_Bol030665;gene_Bol031851;gene_Bol032113;gene_Bol032156;gene_Bol032573;gene_Bol038854;gene_Bol039093;gene_Bol041146;gene_Bol042123;gene_Bol042830	K16224+K16224+K13457+K13416+K15397+K13412+K16226+K02358+K13428+K13416+K13447+K02358+K18878+K13414+K15397+K13420+K13430+K09487+K13435+K13430+K13430+K13416+K13416
