# Supplementary material for: Transcriptome Analysis Reveals the Mechanism by Which Exogenous Melatonin Treatment Delays Leaf Senescence of Postharvest Chinese Kale (Brassica oleracea var. alboglabra)
Source: Int J Mol Sci. 2024 Feb 13;25(4):2250. doi: 10.3390/ijms25042250 (PMC10889248; doi:10.3390/ijms25042250)
Supplement: Supplementary file 1 [file ijms-25-02250-s001.zip › Di et al. Supplementary Table S3.xlsx]

## Sheet: Sheet1
Supplementary Table 3 A dataset of DEGs in comparison pair C3 vs M3
#ID	C3-1_FPKM	C3-2_FPKM	C3-3_FPKM	M3-1_FPKM	M3-2_FPKM	M3-3_FPKM	Pvalue	log2FC	regulated	KEGG_annotation	KEGG_pathway_annotation
gene_Bol038575	8.61092	8.50827	12.6447	4.92437	6.18959	3.51327	0.000828191	-0.939944	down	K06943|1.6e-255|boe:106296530|K06943 nucleolar GTP-binding protein | (RefSeq) nucleolar GTP-binding protein 1-like	Ribosome biogenesis in eukaryotes (ko03008)
gene_Bol026530	10.3795	10.4294	4.1692	12.3123	15.1135	14.8927	0.0225492	0.855119	up	--	--
Brassica_oleracea_newGene_10021	32.0069	13.8463	5.48133	7.70383	0.926275	4.84897	0.0207226	-1.77778	down	K07304|6.6e-116|bna:106438378|K07304 peptide-methionine (S)-S-oxide reductase [EC:1.8.4.11] | (RefSeq) peptide methionine sulfoxide reductase A2	--
gene_Bol029178	3.1263	3.54722	8.47138	1.54666	0.896312	1.72458	0.00465183	-1.71067	down	K22312|2.7e-47|lsv:111898730|K22312 hydroxyjasmonate sulfotransferase [EC:2.8.2.39] | (RefSeq) cytosolic sulfotransferase 5-like	--
gene_Bol006311	4.38744	3.91484	4.15862	5.79751	6.83379	5.07512	0.00883859	0.600068	up	K07198|6.2e-109|boe:106304904|K07198 5'-AMP-activated protein kinase, catalytic alpha subunit [EC:2.7.11.11] | (RefSeq) LOW QUALITY PROTEIN: CBL-interacting serine/threonine-protein kinase 20	--
gene_Bol019430	25.8898	23.1356	35.2433	14.0724	26.0582	13.1916	0.0409516	-0.58763	down	K00099|1.1e-270|bna:106347856|K00099 1-deoxy-D-xylulose-5-phosphate reductoisomerase [EC:1.1.1.267] | (RefSeq) 1-deoxy-D-xylulose 5-phosphate reductoisomerase, chloroplastic-like	Terpenoid backbone biosynthesis (ko00900)
gene_Bol007617	4.81484	3.81179	3.8219	2.00032	3.74765	1.82391	0.0482627	-0.643074	down	K12355|4.1e-57|smo:SELMODRAFT_235150|K12355 coniferyl-aldehyde dehydrogenase [EC:1.2.1.68] | (RefSeq) hypothetical protein	Phenylpropanoid biosynthesis (ko00940)
gene_Bol007094	2.72522	4.31244	8.54322	2.85165	0.798008	0.515077	0.0114745	-1.77973	down	K17471|5.2e-215|boe:106322631|K17471 sulfate transporter 3 | (RefSeq) probable sulfate transporter 3.5	--
gene_Bol042958	10.5311	7.99019	4.45788	17.6118	18.05	12.623	0.00196385	1.15401	up	--	--
gene_Bol007646	2.86929	1.39147	1.80119	0.775205	1.23547	0.57952	0.0132726	-1.14323	down	K22390|0.0e+00|bna:106407040|K22390 acid phosphatase type 7 | (RefSeq) purple acid phosphatase 15	--
gene_Bol012983	10.3239	10.1662	18.7381	6.57137	5.6293	5.68048	0.00120999	-1.02163	down	K16297|6.6e-284|boe:106328067|K16297 serine carboxypeptidase-like clade II [EC:3.4.16.-] | (RefSeq) serine carboxypeptidase-like 29	--
gene_Bol022139	75.2869	63.8261	34.5018	91.5528	90.9228	87.1083	0.0196174	0.732622	up	K07953|4.1e-107|bna:106453166|K07953 GTP-binding protein SAR1 [EC:3.6.5.-] | (RefSeq) GTP-binding protein SAR1B	Protein processing in endoplasmic reticulum (ko04141)
gene_Bol019241	11.569	9.28562	22.1474	6.21366	10.8721	2.97005	0.0243289	-1.04309	down	K09838|0.0e+00|boe:106319391|K09838 zeaxanthin epoxidase [EC:1.14.15.21] | (RefSeq) zeaxanthin epoxidase, chloroplastic	Carotenoid biosynthesis (ko00906)
gene_Bol020654	9.04757	10.6765	6.5937	14.3959	10.4052	17.4615	0.0163794	0.804576	up	K23544|5.2e-102|brp:103842861|K23544 serine incorporator 1/3 | (RefSeq) serine incorporator 3	--
gene_Bol037879	11.7726	14.0075	6.0536	17.0137	15.1846	24.9951	0.0158998	0.963788	up	K07198|1.4e-138|atr:18425660|K07198 5'-AMP-activated protein kinase, catalytic alpha subunit [EC:2.7.11.11] | (RefSeq) CBL-interacting protein kinase 5	--
gene_Bol013052	22.3484	12.494	15.4047	47.546	23.2712	40.5718	0.000478768	1.27951	up	K14487|0.0e+00|boe:106327152|K14487 auxin responsive GH3 gene family | (RefSeq) indole-3-acetic acid-amido synthetase GH3.5	Plant hormone signal transduction (ko04075)
gene_Bol016563	1.18087	1.23128	1.16716	0.321415	0.292605	0.243839	5.21e-05	-1.92844	down	K15042|6.7e-269|boe:106327060|K15042 importin subunit alpha-6/7 | (RefSeq) importin subunit alpha-3-like isoform X1	--
gene_Bol030389	2.98172	2.32653	3.67827	1.52291	1.14632	1.07608	0.00538357	-1.13573	down	K09775|1.6e-15|dzi:111283728|K09775 uncharacterized protein | (RefSeq) uncharacterized protein LOC111283728 isoform X1	--
gene_Bol036644	5.49348	5.02907	5.86468	1.01404	4.03309	1.22625	0.012204	-1.33171	down	--	--
gene_Bol018637	8.13255	9.8553	11.4314	27.4743	10.6884	16.2365	0.0110593	1.00637	up	K16815|1.8e-11|gsl:Gasu_03780|K16815 calcium-independent phospholipase A2-gamma | (RefSeq) hypothetical protein	--
gene_Bol019806	4.52522	4.93206	3.92283	14.125	11.8867	5.65046	0.00134195	1.31441	up	--	--
gene_Bol035455	1.2658	1.19047	1.73301	0.578856	0.998539	0.565161	0.0146146	-0.874983	down	K04681|0.0e+00|bna:106400756|K04681 retinoblastoma-like protein 1 | (RefSeq) retinoblastoma-related protein 1-like isoform X1	--
Brassica_oleracea_newGene_11372	14.8239	17.303	23.6183	10.8929	6.53347	7.59353	0.0005121	-1.02858	down	K00430|3.9e-17|bna:106369783|K00430 peroxidase [EC:1.11.1.7] | (RefSeq) peroxidase N-like	Phenylpropanoid biosynthesis (ko00940)
gene_Bol026267	7.42352	10.3145	7.37488	3.2239	5.52865	4.95753	0.00738929	-0.782031	down	K00695|0.0e+00|bna:106406752|K00695 sucrose synthase [EC:2.4.1.13] | (RefSeq) sucrose synthase 6	Starch and sucrose metabolism (ko00500)
gene_Bol026055	1.95959	1.61509	0.637953	3.86208	2.48566	4.00913	0.0198234	1.39365	up	--	--
Brassica_oleracea_newGene_7766	0	0	0	5.5944	0.894177	1.9761	9.46e-11	9.37549	up	--	--
gene_Bol027967	37.4059	49.101	42.4581	104.807	66.5583	82.128	0.000163579	1.0863	up	--	--
Brassica_oleracea_newGene_10185	0.315012	1.20185	0.647485	1.72816	2.01748	0.973675	0.0095939	1.16494	up	K16224|1.2e-84|brp:103829497|K16224 senescence-induced receptor-like serine/threonine-protein kinase | (RefSeq) senescence-induced receptor-like serine/threonine-protein kinase isoform X2	MAPK signaling pathway - plant (ko04016);; Plant-pathogen interaction (ko04626)
gene_Bol043960	31.1269	40.339	26.1504	45.6799	42.1664	48.4972	0.0256919	0.585992	up	K22522|1.1e-107|boe:106318770|K22522 cytokinin riboside 5'-monophosphate phosphoribohydrolase [EC:3.2.2.-] | (RefSeq) cytokinin riboside 5'-monophosphate phosphoribohydrolase LOG7	--
gene_Bol015789	0.287971	0.793144	0.136795	1.3812	3.11303	1.14852	0.00363528	2.19745	up	K10878|3.8e-207|bna:106377517|K10878 meiotic recombination protein SPO11 | (RefSeq) meiotic recombination protein SPO11-1	--
gene_Bol023155	23.4138	32.9214	20.3754	7.57557	22.3154	10.973	0.0264923	-0.853192	down	K01051|0.0e+00|bna:106381178|K01051 pectinesterase [EC:3.1.1.11] | (RefSeq) probable pectinesterase/pectinesterase inhibitor 25	Pentose and glucuronate interconversions (ko00040)
gene_Bol018908	78.7102	104.189	42.1983	206.751	76.1206	191.927	0.0120573	1.20745	up	K13899|9.8e-16|pmum:103326979|K13899 cystatin-C | (RefSeq) cysteine proteinase inhibitor 1	--
gene_Bol011520	4.24763	6.49486	5.47872	3.60111	2.97948	2.32125	0.0444105	-0.764838	down	K22378|3.9e-15|bna:106440523|K22378 E3 ubiquitin-protein ligase RNF181 [EC:2.3.2.27] | (RefSeq) E3 ubiquitin-protein ligase At3g02290-like	--
gene_Bol025649	14.2395	11.7426	9.4181	18.3669	17.4659	18.4471	0.00218508	0.721254	up	K24221|1.3e-217|aly:9329872|K24221 type I inositol polyphosphate 5-phosphatase IP5P1/2 [EC:3.1.3.56] | (RefSeq) type I inositol polyphosphate 5-phosphatase 1 isoform X1	Inositol phosphate metabolism (ko00562)
gene_Bol008560	1.90657	1.56777	2.48496	0.790764	1.57643	0.913967	0.046175	-0.776151	down	K01180|3.3e-60|cmax:111487562|K01180 endo-1,3(4)-beta-glucanase [EC:3.2.1.6] | (RefSeq) uncharacterized protein LOC111487562	--
gene_Bol032277	9.77983	10.7458	5.18199	11.2694	11.2291	21.6671	0.0396425	0.907739	up	K01850|4.0e-187|bna:106397521|K01850 chorismate mutase [EC:5.4.99.5] | (RefSeq) chorismate mutase 1, chloroplastic-like	Phenylalanine, tyrosine and tryptophan biosynthesis (ko00400);; Biosynthesis of amino acids (ko01230)
gene_Bol043325	4.36839	4.80245	11.9834	2.95007	1.98666	3.8425	0.042461	-1.12445	down	K19891|4.4e-16|vra:106769555|K19891 glucan endo-1,3-beta-glucosidase 1/2/3 [EC:3.2.1.39] | (RefSeq) glucan endo-1,3-beta-glucosidase 1	Starch and sucrose metabolism (ko00500)
gene_Bol009367	22.5122	18.2709	12.0362	22.7762	34.526	28.2274	0.00840214	0.784793	up	K09874|2.8e-163|bna:106423215|K09874 aquaporin NIP | (RefSeq) aquaporin NIP1-2	--
gene_Bol029935	35.1077	27.9423	53.7974	26.7307	18.4754	22.7455	0.0446858	-0.661963	down	K03686|2.0e-11|nsy:104228194|K03686 molecular chaperone DnaJ | (RefSeq) dnaJ homolog 1, mitochondrial-like	--
gene_Bol027638	18.8834	16.6114	26.7254	8.27563	12.0119	9.3459	7.37e-05	-0.974331	down	K12666|0.0e+00|boe:106300031|K12666 oligosaccharyltransferase complex subunit alpha (ribophorin I) | (RefSeq) dolichyl-diphosphooligosaccharide--protein glycosyltransferase subunit 1A	N-Glycan biosynthesis (ko00510);; Various types of N-glycan biosynthesis (ko00513);; Protein processing in endoplasmic reticulum (ko04141)
gene_Bol035774	2.2877	1.81222	1.49159	0.393902	0.52308	1.00032	0.0266023	-1.37701	down	K13993|2.8e-127|bna:106376416|K13993 HSP20 family protein | (RefSeq) inactive protein RESTRICTED TEV MOVEMENT 2-like	Protein processing in endoplasmic reticulum (ko04141)
gene_Bol018888	20.8304	24.8859	11.2934	32.9744	52.6318	18.58	0.0269216	0.918716	up	--	--
gene_Bol023454	0.636965	1.09871	1.84815	0.355009	0.557538	0.225632	0.010753	-1.53956	down	K00924|2.4e-238|tcc:18611088|K00924 kinase [EC:2.7.1.-] | (RefSeq) CDPK-related kinase 5	--
gene_Bol032063	9.86005	10.2399	13.0892	19.4429	18.4213	20.8331	0.000275509	0.93116	up	--	--
gene_Bol007122	12.7047	14.8902	3.19583	29.1896	31.0399	18.7631	0.00729003	1.42768	up	--	--
gene_Bol031176	49.1086	36.2428	24.3531	63.2255	54.15	41.8911	0.0424114	0.629972	up	K11364|3.8e-79|boe:106326826|K11364 SAGA-associated factor 29 | (RefSeq) SAGA-associated factor 29-like	--
gene_Bol043805	79.8586	67.3735	123.35	44.3987	71.3302	48.0097	0.0206476	-0.636497	down	K16297|7.2e-286|bna:106405933|K16297 serine carboxypeptidase-like clade II [EC:3.4.16.-] | (RefSeq) serine carboxypeptidase-like 35	--
gene_Bol016419	8.49549	13.805	20.7667	4.92367	6.3304	10.0232	0.0496206	-0.889156	down	--	--
gene_Bol038246	26.6559	24.8845	18.2796	37.3056	26.0301	44.6316	0.0244719	0.752933	up	--	--
gene_Bol036512	56.2555	50.1795	34.5942	96.4583	48.2451	77.0603	0.0270102	0.774507	up	K03283|1.1e-100|bna:106360686|K03283 heat shock 70kDa protein 1/2/6/8 | (RefSeq) probable mediator of RNA polymerase II transcription subunit 37e	Spliceosome (ko03040);; Protein processing in endoplasmic reticulum (ko04141);; Endocytosis (ko04144)
gene_Bol012794	10.5602	8.02064	7.54551	18.8052	13.6244	10.5364	0.00620778	0.811987	up	K14497|4.7e-24|lsv:111880373|K14497 protein phosphatase 2C [EC:3.1.3.16] | (RefSeq) probable protein phosphatase 2C 24	MAPK signaling pathway - plant (ko04016);; Plant hormone signal transduction (ko04075)
Brassica_oleracea_newGene_9974	0.995771	1.08072	1.82831	0.653461	0.676392	0.299895	0.0288035	-1.10363	down	K22683|2.8e-40|smo:SELMODRAFT_93504|K22683 aspartyl protease family protein [EC:3.4.23.-] | (RefSeq) hypothetical protein	--
Brassica_oleracea_newGene_1230	26.4297	25.8495	25.6052	31.8335	116.423	29.9868	0.00815511	1.2243	up	--	--
gene_Bol044221	2.27507	4.20799	3.98222	6.45911	17.9392	4.61707	0.00712869	1.49856	up	K01803|5.0e-39|sbi:8057784|K01803 triosephosphate isomerase (TIM) [EC:5.3.1.1] | (RefSeq) triosephosphate isomerase, cytosolic	Glycolysis / Gluconeogenesis (ko00010);; Fructose and mannose metabolism (ko00051);; Inositol phosphate metabolism (ko00562);; Carbon fixation in photosynthetic organisms (ko00710);; Carbon metabolism (ko01200);; Biosynthesis of amino acids (ko01230)
gene_Bol034262	14.7545	13.3612	20.5861	6.22139	14.8653	5.81425	0.0255384	-0.797493	down	K01191|0.0e+00|bna:111204288|K01191 alpha-mannosidase [EC:3.2.1.24] | (RefSeq) probable alpha-mannosidase At5g13980	Other glycan degradation (ko00511)
Brassica_oleracea_newGene_7248	1.68301	0.77792	1.55948	0.647215	0.379361	0.211784	0.00648318	-1.55746	down	--	--
gene_Bol005036	26.9157	23.0515	11.0776	41.3094	35.6733	40.8655	0.00327207	1.05488	up	--	--
gene_Bol016204	2.61542	3.01547	4.70021	0.955155	1.70703	2.27872	0.0407822	-0.943714	down	--	--
gene_Bol015852	107.53	98.5999	124.808	164.385	206.238	198.627	7.01e-07	0.885376	up	K14652|1.8e-298|bna:106426651|K14652 3,4-dihydroxy 2-butanone 4-phosphate synthase / GTP cyclohydrolase II [EC:4.1.99.12 3.5.4.25] | (RefSeq) bifunctional riboflavin biosynthesis protein RIBA 1, chloroplastic-like	Riboflavin metabolism (ko00740);; Folate biosynthesis (ko00790)
gene_Bol023755	4.10544	2.98455	2.15525	1.88081	1.991	0.914982	0.0496276	-0.863877	down	K13430|3.8e-83|egu:105034278|K13430 serine/threonine-protein kinase PBS1 [EC:2.7.11.1] | (RefSeq) serine/threonine-protein kinase PBS1	Plant-pathogen interaction (ko04626)
gene_Bol005080	12.695	8.97738	5.44739	11.8041	15.5465	18.5909	0.017389	0.869262	up	K13436|3.4e-66|bna:106394899|K13436 pto-interacting protein 1 [EC:2.7.11.1] | (RefSeq) PTI1-like tyrosine-protein kinase 3	Plant-pathogen interaction (ko04626)
gene_Bol033479	33.5906	30.6572	26.115	61.7329	37.7936	54.7589	0.00249905	0.890914	up	K22936|5.1e-91|bna:106402663|K22936 protein canopy 1/2 | (RefSeq) protein canopy homolog 3	--
gene_Bol024541	1150.81	1137.14	688.446	1554.32	1644.84	1967.83	0.00117898	0.903418	up	K00261|3.0e-240|boe:106321648|K00261 glutamate dehydrogenase (NAD(P)+) [EC:1.4.1.3] | (RefSeq) glutamate dehydrogenase 2-like	Arginine biosynthesis (ko00220);; Alanine, aspartate and glutamate metabolism (ko00250);; Nitrogen metabolism (ko00910);; Carbon metabolism (ko01200)
gene_Bol018844	17.8078	18.4279	13.1526	23.2793	19.8595	29.9132	0.0336864	0.681593	up	K09022|6.3e-79|bna:106397837|K09022 2-iminobutanoate/2-iminopropanoate deaminase [EC:3.5.99.10] | (RefSeq) reactive Intermediate Deaminase A, chloroplastic	--
gene_Bol030655	7.32461	8.58171	10.0629	4.55709	6.35935	3.91281	0.00801881	-0.721304	down	K12126|1.2e-12|pop:7478869|K12126 phytochrome-interacting factor 3 | (RefSeq) transcription factor PIF3 isoform X1	Plant hormone signal transduction (ko04075);; Circadian rhythm - plant (ko04712)
gene_Bol010215	2.00737	2.18564	0.574522	7.79533	7.1185	3.2415	0.000541666	1.98585	up	K19562|7.3e-156|bna:106404343|K19562 bifunctional dethiobiotin synthetase / adenosylmethionine---8-amino-7-oxononanoate aminotransferase [EC:6.3.3.3 2.6.1.62] | (RefSeq) bifunctional dethiobiotin synthetase/7,8-diamino-pelargonic acid aminotransferase, mitochondrial-like	Biotin metabolism (ko00780)
gene_Bol018571	5.96986	10.3022	10.1365	5.57619	2.38671	4.85664	0.0472975	-0.909242	down	K09286|2.9e-151|bna:106411306|K09286 EREBP-like factor | (RefSeq) ethylene-responsive transcription factor ERF060-like	--
gene_Bol032464	9.25792	15.6886	20.1977	8.1873	11.8169	5.37882	0.0419041	-0.759466	down	K11838|1.0e-15|nnu:104601486|K11838 ubiquitin carboxyl-terminal hydrolase 7 [EC:3.4.19.12] | (RefSeq) ubiquitin carboxyl-terminal hydrolase 12	--
gene_Bol005602	3.62085	4.14602	3.1345	1.80251	2.43161	2.25007	0.00826962	-0.653406	down	K13459|2.3e-06|vvi:100246150|K13459 disease resistance protein RPS2 | (RefSeq) probable disease resistance protein At5g63020-like	Plant-pathogen interaction (ko04626)
gene_Bol005235	19.9938	21.7509	15.201	33.4644	23.8231	29.2092	0.0136652	0.710971	up	K08311|3.9e-08|mis:MICPUN_59826|K08311 putative (di)nucleoside polyphosphate hydrolase [EC:3.6.1.-] | (RefSeq) predicted protein	RNA degradation (ko03018)
gene_Bol041249	1.66	2.3585	1.84781	0.53772	1.42362	0.643867	0.0150586	-1.09869	down	K20606|0.0e+00|bna:106346295|K20606 mitogen-activated protein kinase kinase kinase ANP1 [EC:2.7.11.25] | (RefSeq) mitogen-activated protein kinase kinase kinase ANP1-like isoform X1	MAPK signaling pathway - plant (ko04016)
gene_Bol013956	39.2059	49.5532	38.9355	77.7585	41.9818	76.6207	0.0234249	0.746748	up	--	--
gene_Bol041351	29.3593	29.0026	18.9508	38.9661	31.3693	38.498	0.0312602	0.60334	up	K14638|3.2e-89|csat:104711020|K14638 solute carrier family 15 (peptide/histidine transporter), member 3/4 | (RefSeq) protein NRT1/ PTR FAMILY 2.3-like	--
gene_Bol038539	13.7037	11.6416	16.9678	7.84172	9.94245	4.51215	0.00409178	-0.84707	down	K17761|3.4e-289|brp:103832421|K17761 succinate-semialdehyde dehydrogenase, mitochondrial [EC:1.2.1.24] | (RefSeq) succinate-semialdehyde dehydrogenase, mitochondrial isoform X1	Alanine, aspartate and glutamate metabolism (ko00250);; Butanoate metabolism (ko00650)
gene_Bol024486	18.7335	16.005	12.3376	17.4058	34.7844	20.3832	0.0195982	0.695636	up	K05278|2.5e-68|cam:101504604|K05278 flavonol synthase [EC:1.14.20.6] | (RefSeq) flavonol synthase/flavanone 3-hydroxylase-like	Flavonoid biosynthesis (ko00941)
gene_Bol038637	1.31943	0.697595	0.669062	2.61523	1.88731	1.52094	0.00674483	1.25515	up	K03686|2.0e-267|boe:106292712|K03686 molecular chaperone DnaJ | (RefSeq) chaperone protein DnaJ	--
gene_Bol022755	231.454	213.039	124.616	329.854	235.387	338.839	0.0145593	0.784268	up	K00469|2.2e-181|boe:106302120|K00469 inositol oxygenase [EC:1.13.99.1] | (RefSeq) inositol oxygenase 2	Ascorbate and aldarate metabolism (ko00053);; Inositol phosphate metabolism (ko00562)
gene_Bol004659	25.2638	28.8069	23.7346	49.8329	32.2853	63.7304	0.00338456	1.03478	up	--	--
gene_Bol013755	5.41242	6.32212	9.04447	4.09337	4.58075	2.03343	0.0182657	-0.877482	down	K02925|7.2e-220|bna:106376770|K02925 large subunit ribosomal protein L3e | (RefSeq) 60S ribosomal protein L3-2	Ribosome (ko03010)
gene_Bol021467	5.09193	5.04177	6.25815	2.80565	4.55748	2.41305	0.00965959	-0.668211	down	K14297|0.0e+00|boe:106300164|K14297 nuclear pore complex protein Nup98-Nup96 | (RefSeq) nuclear pore complex protein NUP96-like	RNA transport (ko03013)
gene_Bol019673	4.2363	6.71962	5.3949	13.1067	7.95818	16.3791	0.00308696	1.32621	up	K09286|8.7e-72|boe:106310477|K09286 EREBP-like factor | (RefSeq) ethylene-responsive transcription factor 6	--
gene_Bol026105	2.34599	2.49644	1.85526	2.79475	3.4596	4.17327	0.0494901	0.742213	up	K03648|2.0e-42|bpg:Bathy04g01430|K03648 uracil-DNA glycosylase [EC:3.2.2.27] | (RefSeq) uracil-DNA glycosylase	Base excision repair (ko03410)
gene_Bol023300	4.49197	3.67071	1.63134	8.73159	15.8861	5.20149	0.000318857	1.65239	up	K01537|0.0e+00|boe:106313950|K01537 P-type Ca2+ transporter type 2C [EC:7.2.2.10] | (RefSeq) putative calcium-transporting ATPase 13, plasma membrane-type	--
gene_Bol039152	3.43177	3.98837	2.58444	14.386	11.8696	4.47425	0.00014567	1.68514	up	K19562|3.7e-194|bna:106404343|K19562 bifunctional dethiobiotin synthetase / adenosylmethionine---8-amino-7-oxononanoate aminotransferase [EC:6.3.3.3 2.6.1.62] | (RefSeq) bifunctional dethiobiotin synthetase/7,8-diamino-pelargonic acid aminotransferase, mitochondrial-like	Biotin metabolism (ko00780)
gene_Bol043877	2.25106	1.00617	0.657584	1.98394	4.68769	2.36263	0.0182792	1.26948	up	--	--
gene_Bol044942	35.2548	33.82	77.5358	13.4816	20.8124	18.5195	0.000133103	-1.36909	down	K00276|0.0e+00|boe:106327224|K00276 primary-amine oxidase [EC:1.4.3.21] | (RefSeq) primary amine oxidase-like	Glycine, serine and threonine metabolism (ko00260);; Tyrosine metabolism (ko00350);; Phenylalanine metabolism (ko00360);; beta-Alanine metabolism (ko00410);; Isoquinoline alkaloid biosynthesis (ko00950);; Tropane, piperidine and pyridine alkaloid biosynthesis (ko00960)
gene_Bol027024	277.631	235.747	314.285	165.761	203.159	148.443	0.000282011	-0.586261	down	K22390|5.5e-187|bna:106390905|K22390 acid phosphatase type 7 | (RefSeq) bifunctional purple acid phosphatase 26-like isoform X1	--
gene_Bol012522	22.4307	23.7416	11.0061	17.0942	45.396	41.621	0.0326708	0.951463	up	--	--
gene_Bol030125	9.32457	16.7139	3.74642	22.0923	19.552	16.7789	0.0390074	1.05617	up	--	--
gene_Bol031280	19.272	30.204	11.2462	33.349	26.8484	36.1827	0.0480293	0.773084	up	K07393|1.3e-34|zma:103649984|K07393 glutathionyl-hydroquinone reductase [EC:1.8.5.7] | (RefSeq) uncharacterized protein LOC103649984	--
gene_Bol023866	2.22944	3.04181	0.827551	5.48156	3.9933	4.23039	0.0103525	1.25943	up	K16225|1.9e-46|crb:17875137|K16225 probable WRKY transcription factor 52 | (RefSeq) disease resistance protein RRS1	Plant-pathogen interaction (ko04626)
gene_Bol023174	1490.98	1536.17	818.665	1801.92	2124.73	2054.35	0.0100602	0.733174	up	--	--
gene_Bol017969	15.4896	14.6559	18.5255	12.0683	8.4576	8.12127	0.0154664	-0.657388	down	K02991|7.3e-133|boe:106322754|K02991 small subunit ribosomal protein S6e | (RefSeq) 40S ribosomal protein S6-1	Ribosome (ko03010)
Brassica_oleracea_newGene_11868	4.30007	1.25592	0.266841	4.55177	12.6448	13.5371	0.00152266	2.47135	up	K13412|8.4e-07|boe:106329870|K13412 calcium-dependent protein kinase [EC:2.7.11.1] | (RefSeq) LOW QUALITY PROTEIN: calcium-dependent protein kinase 25	Plant-pathogen interaction (ko04626)
gene_Bol034214	89.7768	66.1479	61.4295	126.023	95.2476	116.5	0.00369246	0.749862	up	K12835|1.0e-25|cmax:111493042|K12835 ATP-dependent RNA helicase DDX42 [EC:3.6.4.13] | (RefSeq) DEAD-box ATP-dependent RNA helicase 24 isoform X1	Spliceosome (ko03040)
gene_Bol010778	1.20134	1.18067	2.08518	0.401185	0.894386	0.345018	0.0425062	-1.30717	down	--	--
gene_Bol005918	1549.48	1714.27	952.337	2439.86	1757.77	2768.2	0.00995946	0.843267	up	--	--
gene_Bol032729	3.01796	4.13901	3.03696	5.15229	5.3682	6.40253	0.00563999	0.832568	up	K01762|8.0e-274|boe:106332403|K01762 1-aminocyclopropane-1-carboxylate synthase [EC:4.4.1.14] | (RefSeq) 1-aminocyclopropane-1-carboxylate synthase 8-like	Cysteine and methionine metabolism (ko00270)
gene_Bol029844	133.415	117.891	176.039	93.1383	72.1579	74.3424	0.00200066	-0.724133	down	--	--
gene_Bol017985	81.6458	73.5504	60.1044	93.7177	107.262	111.124	0.00210885	0.638659	up	K13425|6.6e-25|ccav:112523260|K13425 WRKY transcription factor 22 | (RefSeq) WRKY transcription factor 22-like	MAPK signaling pathway - plant (ko04016);; Plant-pathogen interaction (ko04626)
gene_Bol031362	3.60595	3.24269	4.02904	4.83189	10.2418	4.91052	0.0138481	0.938698	up	--	--
gene_Bol039959	6.35499	5.99926	7.10751	3.37728	6.17459	1.92372	0.0479728	-0.708566	down	K01952|0.0e+00|bna:106405851|K01952 phosphoribosylformylglycinamidine synthase [EC:6.3.5.3] | (RefSeq) probable phosphoribosylformylglycinamidine synthase, chloroplastic/mitochondrial	Purine metabolism (ko00230)
gene_Bol015528	15.0612	11.0466	8.27803	14.8372	16.8056	20.1082	0.0248289	0.699541	up	K05857|2.6e-91|bna:106388063|K05857 phosphatidylinositol phospholipase C, delta [EC:3.1.4.11] | (RefSeq) phosphoinositide phospholipase C 4	Inositol phosphate metabolism (ko00562);; Phosphatidylinositol signaling system (ko04070)
Brassica_oleracea_newGene_2750	3.55652	3.33818	9.24992	3.981	0.927404	0.949433	0.0438381	-1.33675	down	--	--
Brassica_oleracea_newGene_11587	34.82	16.7083	32.7768	4.70255	2.61415	2.1941	6.25e-14	-3.02845	down	K14826|5.7e-39|crb:17882352|K14826 FK506-binding nuclear protein [EC:5.2.1.8] | (RefSeq) uncharacterized protein LOC17882352	--
gene_Bol017041	2.1843	1.21381	2.63905	0.461127	1.24892	0.552055	0.00689083	-1.34585	down	K17573|1.4e-62|gmx:100819329|K17573 meiosis arrest female protein 1 | (RefSeq) uncharacterized protein LOC100819329	--
gene_Bol032622	5.68093	4.50095	3.80766	5.80675	8.40448	6.29294	0.0306168	0.640325	up	K12486|9.5e-150|bna:106369025|K12486 stromal membrane-associated protein | (RefSeq) probable ADP-ribosylation factor GTPase-activating protein AGD13	Endocytosis (ko04144)
gene_Bol027151	63.6557	55.4487	67.6535	52.4903	19.3166	16.0289	0.0250445	-0.98143	down	K17500|3.9e-90|nta:107765414|K17500 integrin-linked kinase-associated serine/threonine phosphatase 2C [EC:3.1.3.16] | (RefSeq) WAT1-related protein At3g18200-like	--
gene_Bol008406	63.1035	61.2371	37.0845	81.1597	59.9443	91.0771	0.0425955	0.642969	up	--	--
Brassica_oleracea_newGene_11620	0.922791	0.913464	2.57317	0	0	0	7.45e-08	-7.82867	down	--	--
gene_Bol019002	3.0168	5.91922	5.22319	2.01341	2.88296	2.48331	0.0354585	-0.844574	down	--	--
gene_Bol015308	0.705065	0.585199	0.417905	1.26269	1.93125	1.59698	0.000159243	1.57027	up	K03453|5.6e-06|han:110873038|K03453 bile acid:Na+ symporter, BASS family | (RefSeq) probable sodium/metabolite cotransporter BASS3, chloroplastic	--
gene_Bol039565	63.294	43.4533	155.455	36.8923	38.6029	34.6269	0.0075996	-1.14082	down	K19892|5.4e-46|mus:103975262|K19892 glucan endo-1,3-beta-glucosidase 4 [EC:3.2.1.39] | (RefSeq) glucan endo-1,3-beta-glucosidase 4 isoform X2	Starch and sucrose metabolism (ko00500)
Brassica_oleracea_newGene_7690	9.0813	9.70431	12.6941	3.0934	5.9905	3.57748	0.000450127	-1.228	down	--	--
gene_Bol023452	14.3861	12.2361	7.26898	51.6605	6.0102	30.6228	0.0268682	1.51972	up	--	--
gene_Bol027795	4.67704	3.63909	3.44025	7.23533	8.09205	6.26751	0.00355827	0.959735	up	--	--
gene_Bol006580	1.963	1.37563	0.83479	10.224	12.6101	6.75404	7.66e-14	2.89223	up	K09490|6.5e-176|bna:106377007|K09490 endoplasmic reticulum chaperone BiP [EC:3.6.4.10] | (RefSeq) LOW QUALITY PROTEIN: probable mediator of RNA polymerase II transcription subunit 37b	Protein export (ko03060);; Protein processing in endoplasmic reticulum (ko04141)
gene_Bol012524	27.7894	30.6231	47.9473	20.9307	24.3156	11.8744	0.00864573	-0.818492	down	K00847|1.0e-213|bna:106348199|K00847 fructokinase [EC:2.7.1.4] | (RefSeq) probable fructokinase-6, chloroplastic	Fructose and mannose metabolism (ko00051);; Starch and sucrose metabolism (ko00500);; Amino sugar and nucleotide sugar metabolism (ko00520)
gene_Bol030170	4.29228	6.1051	5.52061	13.6894	6.92691	6.29763	0.0446174	0.857896	up	K10669|2.5e-104|bna:111197950|K10669 2'-phosphotransferase [EC:2.7.1.160] | (RefSeq) tRNA 2'-phosphotransferase 1-like	--
gene_Bol036547	6.02142	5.53744	13.4788	1.36674	4.97689	1.14299	0.00745546	-1.69262	down	--	--
gene_Bol039709	2.92816	5.297	2.88849	10.1438	8.26315	4.67051	0.0126822	1.13006	up	K23344|6.8e-70|bna:106445626|K23344 DDRGK domain-containing protein 1 | (RefSeq) DDRGK domain-containing protein 1-like	--
Brassica_oleracea_newGene_8022	0.83231	0.41041	0.52493	1.09259	1.28438	1.169	0.047779	1.05118	up	K09422|9.3e-49|bna:106436297|K09422 transcription factor MYB, plant | (RefSeq) transcription factor LAF1	--
gene_Bol034421	16.014	15.9994	16.833	28.5915	16.3574	23.936	0.0417616	0.614789	up	K08488|6.5e-108|boe:106332067|K08488 syntaxin 7 | (RefSeq) syntaxin-21	SNARE interactions in vesicular transport (ko04130);; Phagosome (ko04145)
gene_Bol039154	16.411	21.8736	28.1721	14.6142	14.7632	11.289	0.0300873	-0.611654	down	--	--
gene_Bol017051	4.20503	3.16967	4.10471	2.17889	2.85641	1.42013	0.0202218	-0.747491	down	K14050|3.3e-17|aly:9318693|K14050 geranylgeranyl transferase type-2 subunit alpha [EC:2.5.1.60] | (RefSeq) geranylgeranyl transferase type-2 subunit alpha 2	--
gene_Bol004404	82.1603	79.2571	60.8273	130.655	83.591	101.967	0.0210016	0.620047	up	--	--
Brassica_oleracea_newGene_8706	0.999142	0.72703	1.00923	0.272642	0.680409	0.265752	0.0484561	-1.07439	down	K17545|1.1e-42|zma:103634684|K17545 serine/threonine-protein kinase ULK4 [EC:2.7.11.1] | (RefSeq) uncharacterized protein LOC103634684	--
gene_Bol029656	5.95676	4.2094	4.22577	1.56645	1.36801	2.56599	0.00509869	-1.24743	down	K08081|5.9e-149|boe:106331418|K08081 tropinone reductase I [EC:1.1.1.206] | (RefSeq) tropinone reductase homolog At2g29310 isoform X1	Tropane, piperidine and pyridine alkaloid biosynthesis (ko00960)
gene_Bol024214	3.14748	2.33812	1.49505	4.74647	6.32189	6.18138	0.00416856	1.38093	up	--	--
Brassica_oleracea_newGene_1105	7.07088	4.04214	6.33437	1.60819	5.17618	1.72926	0.0486701	-0.895571	down	--	--
gene_Bol041352	20.7722	27.6116	23.9919	48.4723	29.1879	32.8255	0.0149026	0.718172	up	K14638|3.0e-82|csat:104711020|K14638 solute carrier family 15 (peptide/histidine transporter), member 3/4 | (RefSeq) protein NRT1/ PTR FAMILY 2.3-like	--
gene_Bol014027	19.0909	20.3226	27.91	10.3662	7.52742	12.3107	0.00341789	-1.03034	down	K22048|1.4e-23|csv:101209209|K22048 mechanosensitive ion channel protein 4/5/6/7/8/9/10 | (RefSeq) mechanosensitive ion channel protein 10	--
gene_Bol035582	4.93631	1.73603	9.01283	1.57373	3.23978	1.54099	0.032972	-1.21599	down	K09840|0.0e+00|boe:106329010|K09840 9-cis-epoxycarotenoid dioxygenase [EC:1.13.11.51] | (RefSeq) 9-cis-epoxycarotenoid dioxygenase NCED3, chloroplastic-like	Carotenoid biosynthesis (ko00906)
gene_Bol043376	9.42782	11.2885	14.5619	6.31996	7.80281	7.67843	0.0154298	-0.589736	down	K13420|9.2e-25|ghi:107934650|K13420 LRR receptor-like serine/threonine-protein kinase FLS2 [EC:2.7.11.1] | (RefSeq) probable LRR receptor-like serine/threonine-protein kinase At3g47570 isoform X1	MAPK signaling pathway - plant (ko04016);; Plant-pathogen interaction (ko04626)
gene_Bol038478	4.59543	5.41347	5.5391	1.78447	3.78986	2.48371	0.00700925	-0.865319	down	K03353|0.0e+00|bna:106354675|K03353 anaphase-promoting complex subunit 6 | (RefSeq) anaphase-promoting complex subunit 6	Ubiquitin mediated proteolysis (ko04120)
gene_Bol008453	3.34168	2.5515	5.01505	1.74591	1.91668	1.7984	0.0148635	-0.890484	down	--	--
gene_Bol021222	41.6303	51.6199	54.7911	28.7091	35.5069	25.2731	0.00123126	-0.637649	down	K02997|4.2e-107|bna:106367186|K02997 small subunit ribosomal protein S9e | (RefSeq) 40S ribosomal protein S9-1	Ribosome (ko03010)
gene_Bol030275	17.3249	16.1919	12.4041	24.7286	24.755	21.945	0.00116384	0.732312	up	K02939|2.4e-119|bna:106413744|K02939 large subunit ribosomal protein L9 | (RefSeq) uncharacterized protein LOC106413744	Ribosome (ko03010)
gene_Bol011065	58.0836	37.464	368.783	16.538	23.3241	18.6125	0.0024802	-2.87774	down	K19892|2.0e-48|mus:103975262|K19892 glucan endo-1,3-beta-glucosidase 4 [EC:3.2.1.39] | (RefSeq) glucan endo-1,3-beta-glucosidase 4 isoform X2	Starch and sucrose metabolism (ko00500)
gene_Bol015871	10.5078	5.19417	3.20225	16.2841	13.3027	17.8664	0.00118261	1.44243	up	K03100|2.2e-28|pop:18104955|K03100 signal peptidase I [EC:3.4.21.89] | (RefSeq) uncharacterized protein LOC18104955	Protein export (ko03060)
Brassica_oleracea_newGene_1516	1.2243	0.656711	0.861195	2.0049	1.62326	1.24207	0.0243389	0.923057	up	K22733|9.3e-114|cit:102612526|K22733 magnesium transporter | (RefSeq) uncharacterized protein LOC102612526	--
gene_Bol004630	117.282	94.0336	76.5459	165.025	124.343	185.388	0.00308895	0.842991	up	K09490|3.8e-170|bna:106437759|K09490 endoplasmic reticulum chaperone BiP [EC:3.6.4.10] | (RefSeq) mediator of RNA polymerase II transcription subunit 37f-like	Protein export (ko03060);; Protein processing in endoplasmic reticulum (ko04141)
gene_Bol031000	7.10715	5.51989	5.80355	2.8348	3.03692	4.39032	0.0327416	-0.724877	down	--	--
gene_Bol008791	1.75644	0.900134	1.56023	0.82196	0.329195	0.337148	0.0219755	-1.36823	down	K00166|3.6e-274|bna:106384942|K00166 2-oxoisovalerate dehydrogenase E1 component alpha subunit [EC:1.2.4.4] | (RefSeq) 2-oxoisovalerate dehydrogenase subunit alpha 2, mitochondrial	Valine, leucine and isoleucine degradation (ko00280);; Propanoate metabolism (ko00640)
gene_Bol030278	11.8676	16.0303	19.1271	11.3552	9.02259	5.72235	0.0184991	-0.757577	down	K00797|3.0e-212|bna:106414322|K00797 spermidine synthase [EC:2.5.1.16] | (RefSeq) spermine synthase-like	Cysteine and methionine metabolism (ko00270);; Arginine and proline metabolism (ko00330);; Glutathione metabolism (ko00480)
gene_Bol025269	62.8193	53.8697	49.1464	81.0669	93.9551	70.9843	0.000100567	0.658832	up	--	--
gene_Bol029270	2.08155	0.971413	2.58784	1.10968	0.632145	0.54211	0.0222545	-1.18792	down	K23544|9.9e-148|brp:103842861|K23544 serine incorporator 1/3 | (RefSeq) serine incorporator 3	--
gene_Bol005768	3.2848	3.11701	6.35198	1.97198	2.87795	1.94033	0.0474966	-0.812735	down	--	--
gene_Bol031103	8.76678	6.97056	6.38012	9.66215	15.2766	7.95134	0.0197833	0.645483	up	K22733|2.3e-238|bna:106367140|K22733 magnesium transporter | (RefSeq) probable magnesium transporter NIPA8 isoform X1	--
gene_Bol011052	11.4728	9.23381	32.6924	9.66131	9.60171	4.38905	0.0262	-1.08838	down	K01408|0.0e+00|bna:106445196|K01408 insulysin [EC:3.4.24.56] | (RefSeq) insulin-degrading enzyme-like 2	--
gene_Bol039869	1.64345	3.02747	1.88035	0.80728	0.405013	0	0.019364	-2.37463	down	--	--
Brassica_oleracea_newGene_4287	0.432264	0.567167	0.505246	1.29027	1.03606	2.49774	0.00428902	1.71616	up	K09422|1.5e-127|boe:106298989|K09422 transcription factor MYB, plant | (RefSeq) transcription factor MYB24	--
gene_Bol028822	17.6588	17.9862	12.0182	30.9553	18.9136	21.2577	0.0316032	0.684545	up	K00891|5.3e-142|bna:106439097|K00891 shikimate kinase [EC:2.7.1.71] | (RefSeq) shikimate kinase 2, chloroplastic-like isoform X1	Phenylalanine, tyrosine and tryptophan biosynthesis (ko00400);; Biosynthesis of amino acids (ko01230)
gene_Bol037043	1.22612	1.68901	1.16559	0.656461	0.515728	0.475222	0.00969638	-1.19546	down	--	--
gene_Bol034748	0.547228	0.686207	3.66145	0.499589	0.117907	0.221637	0.00732687	-2.37632	down	K17471|0.0e+00|boe:106342388|K17471 sulfate transporter 3 | (RefSeq) probable sulfate transporter 3.4	--
gene_Bol027272	0.335811	0.257797	0.125549	1.87489	1.14268	1.58057	1.22e-05	2.73705	up	--	--
gene_Bol042952	23.0604	16.4011	18.5197	31.0625	50.8764	37.7545	1.98e-05	1.13501	up	K08486|3.8e-22|bna:106390699|K08486 syntaxin 1B/2/3 | (RefSeq) syntaxin-122-like	SNARE interactions in vesicular transport (ko04130)
gene_Bol041490	0.975939	1.2812	1.12431	0.521616	0.296126	0.383069	0.00567163	-1.37054	down	K14487|3.7e-307|bna:106357730|K14487 auxin responsive GH3 gene family | (RefSeq) indole-3-acetic acid-amido synthetase GH3.17-like	Plant hormone signal transduction (ko04075)
gene_Bol012840	3.14283	1.77319	1.92541	4.26689	3.44135	3.16889	0.0322196	0.76832	up	K10695|1.8e-206|boe:106301434|K10695 E3 ubiquitin-protein ligase RNF1/2 [EC:2.3.2.27] | (RefSeq) putative E3 ubiquitin-protein ligase RING1a	--
gene_Bol027250	17.8401	12.6105	4.72429	32.3784	18.5418	26.0012	0.00891378	1.24356	up	K13260|1.0e-154|zju:107424876|K13260 isoflavone/4'-methoxyisoflavone 2'-hydroxylase [EC:1.14.14.90 1.14.14.89] | (RefSeq) cytochrome P450 81E8-like	Isoflavonoid biosynthesis (ko00943)
gene_Bol041181	12.0056	21.7272	8.11543	17.0533	48.6302	31.4096	0.00599389	1.276	up	K02575|1.7e-154|bna:106412400|K02575 MFS transporter, NNP family, nitrate/nitrite transporter | (RefSeq) high-affinity nitrate transporter 2.1	Nitrogen metabolism (ko00910)
gene_Bol040115	5.00149	6.24032	4.2875	8.60869	7.93803	7.90331	0.00341486	0.752671	up	--	--
gene_Bol033053	1.81524	1.97927	2.33806	3.96617	2.55709	3.42504	0.0212054	0.813609	up	K23877|6.1e-45|thj:104822059|K23877 xyloglucan O-acetyltransferase | (RefSeq) protein ALTERED XYLOGLUCAN 4-like	--
gene_Bol010125	6.02869	4.85223	5.50303	2.98655	4.06456	2.95715	0.0125121	-0.616419	down	K16587|1.9e-234|bna:111207273|K16587 HAUS augmin-like complex subunit 4 | (RefSeq) AUGMIN subunit 4	--
Brassica_oleracea_newGene_3541	1.65757	0.865841	3.19653	0.508392	0.994812	0.817687	0.0194105	-1.19594	down	--	--
gene_Bol034815	26.1254	41.6639	23.3079	50.3015	46.4839	59.0589	0.0055538	0.880588	up	K08238|1.0e-14|brp:103847104|K08238 xyloglucan 6-xylosyltransferase [EC:2.4.2.39] | (RefSeq) probable xyloglucan 6-xylosyltransferase 3	--
gene_Bol018364	2.52744	2.38551	1.84387	3.67695	3.30676	3.54371	0.0221809	0.738591	up	--	--
gene_Bol027521	160.322	102.557	101.331	61.136	43.113	55.9254	0.000182115	-1.06717	down	K17470|5.4e-235|boe:106296330|K17470 sulfate transporter 1, high-affinity | (RefSeq) sulfate transporter 1.2 isoform X1	--
gene_Bol033288	34.0411	49.4801	49.5069	22.0208	28.139	16.027	0.000347666	-0.929513	down	K00799|1.9e-124|bna:106446968|K00799 glutathione S-transferase [EC:2.5.1.18] | (RefSeq) glutathione S-transferase U7	Glutathione metabolism (ko00480)
gene_Bol038051	8.38593	9.05852	8.89741	14.7178	11.2841	12.8564	0.00667237	0.669785	up	--	--
gene_Bol029569	19.9896	20.8327	70.0001	4.42631	16.0351	9.37453	0.00145944	-1.81167	down	K09872|1.0e-162|bna:106429621|K09872 aquaporin PIP | (RefSeq) aquaporin PIP1-2-like	--
gene_Bol026768	13.9965	4.15247	6.45634	1.51247	4.31528	4.56112	0.0382375	-1.13272	down	--	--
gene_Bol021589	65.9295	48.6207	173.803	33.1655	24.0665	54.0456	0.0156271	-1.2212	down	--	--
gene_Bol019675	97.0861	77.758	83.684	141.585	97.7483	121.455	0.0130338	0.596308	up	K09286|2.3e-128|bna:106381425|K09286 EREBP-like factor | (RefSeq) ethylene-responsive transcription factor 1A-like	--
gene_Bol009394	82.0476	56.8351	100.322	135.726	106.765	111.748	0.0133388	0.678403	up	K02155|9.4e-31|aly:9303178|K02155 V-type H+-transporting ATPase 16kDa proteolipid subunit | (RefSeq) V-type proton ATPase subunit c1	Oxidative phosphorylation (ko00190);; Phagosome (ko04145)
gene_Bol042094	1.41457	1.70236	1.6885	0.483473	0.811233	0.696879	0.0224785	-1.18471	down	--	--
gene_Bol015383	5.76994	4.11234	3.94472	6.31245	6.66043	6.81191	0.0154149	0.620528	up	K13412|2.9e-289|boe:106332964|K13412 calcium-dependent protein kinase [EC:2.7.11.1] | (RefSeq) calcium-dependent protein kinase 1-like	Plant-pathogen interaction (ko04626)
gene_Bol040849	57.9412	67.1136	57.1437	71.6744	105.683	103.141	0.00275875	0.719579	up	K03676|1.6e-24|tcc:18596777|K03676 glutaredoxin 3 | (RefSeq) glutaredoxin-C9	--
gene_Bol036093	6.88243	9.00774	9.86486	4.42388	4.59428	4.14037	0.00273075	-0.871279	down	--	--
gene_Bol038555	5.26716	4.06485	9.8461	0.829057	1.03885	0.882327	3.73e-12	-2.689	down	K23544|1.2e-176|brp:103842861|K23544 serine incorporator 1/3 | (RefSeq) serine incorporator 3	--
gene_Bol044441	7.38346	5.71695	5.86695	8.87363	7.86719	9.85772	0.0447029	0.597787	up	--	--
gene_Bol044840	33.7733	20.6381	20.8409	41.9976	51.3574	31.6084	0.00192538	0.815757	up	K13464|1.1e-144|bna:106368904|K13464 jasmonate ZIM domain-containing protein | (RefSeq) protein TIFY 10A-like	Plant hormone signal transduction (ko04075)
gene_Bol010009	7.37363	6.43968	8.27642	3.70534	6.22222	3.07216	0.0138089	-0.691972	down	K23872|3.3e-115|jcu:105643042|K23872 putative homogalacturonan methyltransferase [EC:2.1.1.-] | (RefSeq) probable methyltransferase PMT13	--
gene_Bol037231	192.828	273.145	149.923	269.703	288.912	341.448	0.0267822	0.651287	up	--	--
Brassica_oleracea_newGene_1721	4.99965	6.8309	7.26244	11.499	11.9256	14.2145	0.000214527	1.08616	up	--	--
gene_Bol030910	25.1696	30.4912	43.8902	21.0035	15.0357	9.23141	0.00268162	-1.0439	down	K05350|2.0e-189|boe:106315739|K05350 beta-glucosidase [EC:3.2.1.21] | (RefSeq) beta-glucosidase 44	Cyanoamino acid metabolism (ko00460);; Starch and sucrose metabolism (ko00500);; Phenylpropanoid biosynthesis (ko00940)
gene_Bol021627	9.6705	11.1331	1.07768	14.3117	21.9165	37.7415	0.00848069	1.87068	up	K01183|1.5e-158|bna:106394862|K01183 chitinase [EC:3.2.1.14] | (RefSeq) endochitinase At2g43610	Amino sugar and nucleotide sugar metabolism (ko00520)
gene_Bol014238	12.5061	12.7639	12.3111	20.0976	21.4105	19.3233	0.00014002	0.791851	up	--	--
gene_Bol043875	3.63464	2.70767	3.22061	4.46058	4.12265	5.19491	0.0183988	0.641354	up	K01426|4.2e-29|crb:17877863|K01426 amidase [EC:3.5.1.4] | (RefSeq) probable amidase At4g34880	Arginine and proline metabolism (ko00330);; Phenylalanine metabolism (ko00360);; Tryptophan metabolism (ko00380)
gene_Bol008364	3.52636	3.40511	3.12248	1.35884	0.944169	1.29538	0.00191472	-1.36136	down	--	--
gene_Bol018480	11.2243	8.79495	12.0588	6.4869	8.25107	5.1064	0.0037606	-0.606908	down	--	--
gene_Bol013544	42.9643	57.2292	27.4623	49.845	59.9159	81.6765	0.0493448	0.694783	up	K15015|2.1e-11|aip:107609646|K15015 solute carrier family 32 (vesicular inhibitory amino acid transporter) | (RefSeq) uncharacterized protein LOC107609646 isoform X1	--
Brassica_oleracea_newGene_5044	0.6305	1.07422	0.269706	0.872682	1.69205	1.88407	0.0321856	1.25689	up	K16225|2.2e-106|ath:AT5G45260|K16225 probable WRKY transcription factor 52 | (RefSeq) RRS1; Disease resistance protein (TIR-NBS-LRR class)	Plant-pathogen interaction (ko04626)
gene_Bol005035	66.2396	86.9695	31.3443	90.4073	92.1334	123.312	0.0331008	0.83621	up	K10260|2.9e-12|mpp:MICPUCDRAFT_56233|K10260 F-box and WD-40 domain protein 7 | (RefSeq) WD40 repeat protein	Ubiquitin mediated proteolysis (ko04120)
gene_Bol012590	4.44589	1.1604	13.4675	0.845528	2.11077	1.06107	0.00295558	-2.15999	down	K01126|1.7e-20|nnu:104599310|K01126 glycerophosphoryl diester phosphodiesterase [EC:3.1.4.46] | (RefSeq) glycerophosphodiester phosphodiesterase GDPD6-like	Glycerophospholipid metabolism (ko00564)
gene_Bol043600	8.33311	11.918	8.81968	4.42332	7.27526	3.11609	0.0140899	-0.902109	down	K08515|2.2e-117|bna:106416053|K08515 vesicle-associated membrane protein 7 | (RefSeq) vesicle-associated membrane protein 713	SNARE interactions in vesicular transport (ko04130)
Brassica_oleracea_newGene_3490	1.25978	1.49902	2.25748	0.133685	1.24867	0.296925	0.0395054	-1.63035	down	--	--
gene_Bol006986	311.227	300.558	478.738	227.933	230.822	131.194	0.00321052	-0.801203	down	K14209|2.6e-09|dct:110098536|K14209 solute carrier family 36 (proton-coupled amino acid transporter) | (RefSeq) amino acid transporter AVT3C	--
gene_Bol007340	3.17518	1.59978	0.438735	10.3776	4.19543	6.19526	0.00142645	2.10979	up	K22683|4.1e-62|sind:105156420|K22683 aspartyl protease family protein [EC:3.4.23.-] | (RefSeq) aspartyl protease family protein 2	--
gene_Bol043203	32.9587	29.5999	12.1531	46.1416	42.5247	44.4952	0.0132874	0.933236	up	--	--
gene_Bol005804	2.14475	2.85121	3.25296	0.740752	1.61052	1.27032	0.00423365	-1.09651	down	--	--
gene_Bol013146	20.7975	17.5048	13.8244	30.122	18.9841	34.5147	0.0206982	0.809552	up	K08235|5.4e-111|boe:106295406|K08235 xyloglucan:xyloglucosyl transferase [EC:2.4.1.207] | (RefSeq) probable xyloglucan endotransglucosylase/hydrolase protein 11	--
gene_Bol019665	6.28762	10.3303	8.11613	11.1048	11.9967	23.9278	0.0370997	1.05059	up	--	--
Brassica_oleracea_newGene_3593	7.19955	2.55403	2.76528	0.082082	0.823668	1.33944	0.0130559	-2.11052	down	--	--
Brassica_oleracea_newGene_1743	37.7712	41.8824	48.6418	16.2059	41.328	21.0887	0.0293042	-0.649529	down	--	--
gene_Bol041897	2.05641	2.46053	3.23468	3.45434	4.78059	7.40768	0.0300755	1.12815	up	--	--
gene_Bol008213	9.03973	3.7825	4.62592	1.01567	0.542745	3.1019	0.0272207	-1.71119	down	K13899|1.2e-23|cpap:110807958|K13899 cystatin-C | (RefSeq) cysteine proteinase inhibitor B	--
gene_Bol010394	0.926113	0.908069	0.897166	1.32218	1.84271	1.75068	0.0179031	0.946365	up	K05350|1.2e-10|nnu:104604855|K05350 beta-glucosidase [EC:3.2.1.21] | (RefSeq) beta-glucosidase 46	Cyanoamino acid metabolism (ko00460);; Starch and sucrose metabolism (ko00500);; Phenylpropanoid biosynthesis (ko00940)
gene_Bol041202	30.0612	27.5601	27.7886	48.135	35.8121	47.7288	0.00189253	0.741211	up	K08332|1.2e-07|cmo:103484817|K08332 vacuolar protein 8 | (RefSeq) U-box domain-containing protein 4-like	--
gene_Bol018953	0.174577	0.356015	0.198719	0.676536	0.411002	0.505324	0.0311792	1.20889	up	K16055|0.0e+00|bna:106345849|K16055 trehalose 6-phosphate synthase/phosphatase [EC:2.4.1.15 3.1.3.12] | (RefSeq) alpha,alpha-trehalose-phosphate synthase [UDP-forming] 1	Starch and sucrose metabolism (ko00500)
gene_Bol016098	14.7387	12.2625	17.4643	6.49656	9.40982	6.93648	0.00565921	-0.856867	down	K02929|1.2e-55|bna:106357887|K02929 large subunit ribosomal protein L44e | (RefSeq) 60S ribosomal protein L36a	Ribosome (ko03010)
gene_Bol042896	10.9401	20.6495	9.40037	30.8547	16.8855	19.6328	0.0499695	0.816696	up	K20660|2.5e-138|bna:111207878|K20660 cytochrome P450 family 709 | (RefSeq) cytochrome P450 709B3-like	--
Brassica_oleracea_newGene_3714	2.86865	2.02273	3.49279	1.4856	2.15483	1.03131	0.0268065	-0.766568	down	--	--
gene_Bol023861	2.74677	2.63056	1.68457	4.75071	7.07715	5.76536	0.00011773	1.39433	up	K15014|1.9e-08|qsu:112035105|K15014 solute carrier family 29 (equilibrative nucleoside transporter), member 1/2/3 | (RefSeq) equilibrative nucleotide transporter 3-like	--
gene_Bol008792	59.4016	36.5856	63.4368	8.48454	6.99645	4.44968	1.36e-21	-2.90108	down	K15015|2.2e-08|eus:EUTSA_v10016504mg|K15015 solute carrier family 32 (vesicular inhibitory amino acid transporter) | (RefSeq) hypothetical protein	--
gene_Bol012704	2.27774	1.7117	2.59582	0.399241	1.64528	0.470304	0.0257082	-1.33319	down	K10752|2.8e-222|bna:106347047|K10752 histone-binding protein RBBP4 | (RefSeq) WD-40 repeat-containing protein MSI2	--
Brassica_oleracea_newGene_540	0.102522	1.12483	0.714816	1.73067	4.91362	0.953404	0.0216288	1.92148	up	K15255|5.1e-15|boe:106330833|K15255 ATP-dependent DNA helicase PIF1 [EC:3.6.4.12] | (RefSeq) uncharacterized protein LOC106330833	--
gene_Bol012121	12.4834	9.02929	12.8155	6.2899	6.86879	6.80786	0.00500683	-0.673092	down	K20891|3.6e-197|bna:106429667|K20891 beta-glucuronosyltransferase [EC:2.4.1.-] | (RefSeq) beta-glucuronosyltransferase GlcAT14A-like	--
gene_Bol016815	3.33505	4.82509	7.40638	2.40557	2.05514	2.77353	0.0222127	-0.983943	down	--	--
gene_Bol025753	185.744	270.833	541.821	166.362	148.174	45.514	0.00540262	-1.39825	down	--	--
gene_Bol014348	2.48011	2.72809	3.25368	1.75216	0.873104	1.37207	0.0188546	-0.949418	down	K23877|7.2e-48|eus:EUTSA_v10018613mg|K23877 xyloglucan O-acetyltransferase | (RefSeq) hypothetical protein	--
gene_Bol037730	5.42161	5.95068	6.60276	3.17255	3.91644	3.58656	0.0250471	-0.651812	down	K20363|3.3e-130|boe:106339639|K20363 protein YIPF5/7 | (RefSeq) protein YIPF5 homolog	--
gene_Bol005370	12.291	12.6999	18.2178	7.82494	11.1841	6.93074	0.00962488	-0.650999	down	--	--
gene_Bol025541	7.56109	9.85384	8.07272	5.83934	4.22862	3.94088	0.0135983	-0.759531	down	K02069|1.2e-144|boe:106340527|K02069 putative ABC transport system permease protein | (RefSeq) protein ALUMINUM SENSITIVE 3	--
gene_Bol012554	19.5297	38.7667	37.7309	2.08245	2.02036	10.9886	0.000163388	-2.49117	down	K01580|5.8e-291|bna:106426238|K01580 glutamate decarboxylase [EC:4.1.1.15] | (RefSeq) glutamate decarboxylase 2 isoform X1	Alanine, aspartate and glutamate metabolism (ko00250);; beta-Alanine metabolism (ko00410);; Taurine and hypotaurine metabolism (ko00430);; Butanoate metabolism (ko00650)
gene_Bol037352	30.6432	29.7421	39.7796	20.1015	16.0065	13.3878	0.000942216	-0.911279	down	--	--
gene_Bol043410	186.329	188.267	111.711	202.377	239.827	249.876	0.0237629	0.609494	up	K12818|4.0e-87|smo:SELMODRAFT_429199|K12818 ATP-dependent RNA helicase DHX8/PRP22 [EC:3.6.4.13] | (RefSeq) hypothetical protein	Spliceosome (ko03040)
gene_Bol044376	12.0342	17.4332	58.5699	10.0083	4.26661	6.87808	0.00112595	-1.91904	down	K00108|6.4e-175|boe:106311786|K00108 choline dehydrogenase [EC:1.1.99.1] | (RefSeq) protein HOTHEAD-like	Glycine, serine and threonine metabolism (ko00260)
gene_Bol039563	23.0363	16.2732	13.4279	46.4309	62.3567	58.6064	5.1e-11	1.76487	up	K14504|7.1e-164|bna:106346512|K14504 xyloglucan:xyloglucosyl transferase TCH4 [EC:2.4.1.207] | (RefSeq) probable xyloglucan endotransglucosylase/hydrolase protein 23 isoform X2	Plant hormone signal transduction (ko04075)
gene_Bol007265	14.1501	11.6015	22.8287	7.46198	7.91466	5.31986	0.00193398	-1.13331	down	K01633|1.3e-64|bna:106351230|K01633 7,8-dihydroneopterin aldolase/epimerase/oxygenase [EC:4.1.2.25 5.1.99.8 1.13.11.81] | (RefSeq) dihydroneopterin aldolase 1-like	Folate biosynthesis (ko00790)
gene_Bol024206	9.20042	12.5793	14.6964	6.88127	8.90017	5.6483	0.0247099	-0.683926	down	K02940|5.7e-98|bna:106446281|K02940 large subunit ribosomal protein L9e | (RefSeq) 60S ribosomal protein L9-1	Ribosome (ko03010)
gene_Bol019570	2.77949	1.75266	1.04613	6.72778	7.43529	8.24025	7.94e-07	2.103	up	--	--
gene_Bol035515	7.03222	5.78982	5.89665	10.1386	11.4685	9.79295	0.000374437	0.841564	up	K12863|2.2e-101|bna:111202414|K12863 protein CWC15 | (RefSeq) protein CWC15 homolog	Spliceosome (ko03040)
gene_Bol013054	23.1657	25.0602	19.1899	36.9551	50.877	20.0715	0.0270101	0.737837	up	K24345|4.2e-68|boe:106312930|K24345 calcium-binding protein KIC and related proteins | (RefSeq) calcium-binding protein PBP1	--
gene_Bol029064	5.6654	3.9341	3.80547	6.39703	7.43079	6.57129	0.00778945	0.701664	up	K00924|1.6e-244|bna:106350736|K00924 kinase [EC:2.7.1.-] | (RefSeq) probable serine/threonine-protein kinase CST isoform X1	--
Brassica_oleracea_newGene_9765	1.56382	1.12332	1.0226	1.56154	2.31472	2.29352	0.0390344	0.835582	up	--	--
gene_Bol042744	1.56697	0.969059	0.362341	2.11044	2.42612	2.21097	0.0206427	1.31027	up	K22683|2.8e-260|boe:106301882|K22683 aspartyl protease family protein [EC:3.4.23.-] | (RefSeq) aspartic proteinase nepenthesin-2	--
gene_Bol045144	105.528	116.493	177.316	50.2326	95.335	47.023	0.00127026	-0.9817	down	K05396|4.2e-217|boe:106296456|K05396 D-cysteine desulfhydrase [EC:4.4.1.15] | (RefSeq) bifunctional D-cysteine desulfhydrase/1-aminocyclopropane-1-carboxylate deaminase, mitochondrial	Cysteine and methionine metabolism (ko00270)
gene_Bol038894	30.4089	45.6455	82.773	14.0233	33.0222	6.95265	0.00343449	-1.51793	down	K03146|5.2e-193|boe:106318832|K03146 cysteine-dependent adenosine diphosphate thiazole synthase [EC:2.4.2.60] | (RefSeq) thiamine thiazole synthase, chloroplastic-like	Thiamine metabolism (ko00730)
gene_Bol038076	52.471	41.8546	143.801	24.0645	32.5408	26.2777	0.000964691	-1.41859	down	K11699|0.0e+00|boe:106294140|K11699 RNA-dependent RNA polymerase [EC:2.7.7.48] | (RefSeq) RNA-dependent RNA polymerase 1	--
gene_Bol021255	32.3952	41.1832	49.2327	19.8145	28.9449	21.7066	0.00329709	-0.712017	down	K09060|4.1e-06|egu:105043962|K09060 plant G-box-binding factor | (RefSeq) bZIP transcription factor 16 isoform X1	--
Brassica_oleracea_newGene_75	48.1322	41.2698	84.2138	29.6605	41.2637	26.3708	0.00749263	-0.768875	down	K07426|2.2e-91|cpep:111792333|K07426 cytochrome P450 family 4 subfamily B polypeptide 1 [EC:1.14.14.1] | (RefSeq) cytochrome P450 CYP72A219-like	--
Brassica_oleracea_newGene_1706	1.94095	2.04489	0.854002	3.53271	3.70605	6.36176	0.0103126	1.47766	up	--	--
gene_Bol007705	4.24244	3.45459	1.7569	7.68198	5.32231	6.49601	0.00585053	1.14701	up	--	--
gene_Bol044261	33.4535	32.4434	61.4277	22.0176	27.5456	8.67678	0.0105708	-1.06139	down	K15296|2.2e-144|bna:106402208|K15296 alpha-soluble NSF attachment protein | (RefSeq) alpha-soluble NSF attachment protein 2-like	--
gene_Bol030787	4.63212	2.86071	3.46662	8.97593	8.34547	8.94853	2.2e-05	1.37033	up	K07766|5.8e-115|bna:106427087|K07766 diphosphoinositol-polyphosphate diphosphatase [EC:3.6.1.52] | (RefSeq) nudix hydrolase 4-like	--
gene_Bol009129	65.6497	50.2676	51.0692	76.0969	128.341	112.041	3.17e-05	1.01782	up	K08486|2.2e-159|bna:106390699|K08486 syntaxin 1B/2/3 | (RefSeq) syntaxin-122-like	SNARE interactions in vesicular transport (ko04130)
gene_Bol038938	19.5563	16.3156	22.3706	12.1282	11.1256	10.1001	0.000597713	-0.699537	down	K19891|3.9e-105|smo:SELMODRAFT_442025|K19891 glucan endo-1,3-beta-glucosidase 1/2/3 [EC:3.2.1.39] | (RefSeq) hypothetical protein	Starch and sucrose metabolism (ko00500)
gene_Bol008847	1.81394	7.83234	6.75379	8.12995	15.1306	21.265	0.00789339	1.55288	up	--	--
gene_Bol031939	0.643808	2.09042	0.736446	3.60704	4.55748	1.34099	0.0292068	1.4828	up	K13348|2.2e-137|bna:111207585|K13348 protein Mpv17 | (RefSeq) PXMP2/4 family protein 4-like	Peroxisome (ko04146)
gene_Bol044956	3.28169	3.2212	2.46797	4.44623	5.37886	5.91866	0.00510485	0.914657	up	K14295|7.9e-134|boe:106325055|K14295 nuclear pore complex protein Nup50 | (RefSeq) uncharacterized protein LOC106325055 isoform X1	RNA transport (ko03013)
gene_Bol016114	9.29686	11.2316	9.8331	15.8926	22.63	11.484	0.00233963	0.788794	up	--	--
gene_Bol044732	0.35525	0.290715	0.178176	2.94902	1.91609	1.43914	2.27e-06	2.94153	up	K13422|1.2e-09|boe:106312167|K13422 transcription factor MYC2 | (RefSeq) transcription factor MYC2-like	MAPK signaling pathway - plant (ko04016);; Plant hormone signal transduction (ko04075)
gene_Bol045819	62.0417	88.8515	43.6815	123.133	125.727	151.241	0.00037359	1.14284	up	--	--
gene_Bol010410	2.96104	1.84241	3.79906	1.22739	1.79183	1.29622	0.0244104	-0.890424	down	K00895|2.0e-245|bna:106450749|K00895 diphosphate-dependent phosphofructokinase [EC:2.7.1.90] | (RefSeq) pyrophosphate--fructose 6-phosphate 1-phosphotransferase subunit beta 1	Glycolysis / Gluconeogenesis (ko00010);; Pentose phosphate pathway (ko00030);; Fructose and mannose metabolism (ko00051)
Brassica_oleracea_newGene_2432	1.73341	1.3003	1.28814	2.64722	4.2838	3.23256	8e-05	1.31869	up	--	--
gene_Bol022912	2.44196	3.60985	6.01421	1.76499	1.18501	1.47856	0.0053906	-1.31655	down	K01915|7.3e-211|bna:106439570|K01915 glutamine synthetase [EC:6.3.1.2] | (RefSeq) glutamine synthetase cytosolic isozyme 1-3-like	Arginine biosynthesis (ko00220);; Alanine, aspartate and glutamate metabolism (ko00250);; Glyoxylate and dicarboxylate metabolism (ko00630);; Nitrogen metabolism (ko00910);; Biosynthesis of amino acids (ko01230)
gene_Bol007943	11.1113	11.8066	12.2528	16.192	18.3136	16.0555	0.0470665	0.617501	up	K11647|1.2e-25|bna:106452193|K11647 SWI/SNF-related matrix-associated actin-dependent regulator of chromatin subfamily A member 2/4 [EC:3.6.4.-] | (RefSeq) ATP-dependent helicase BRM-like isoform X1	--
gene_Bol038139	152.299	191.529	105.231	202.628	209.455	225.133	0.0288759	0.605319	up	--	--
Brassica_oleracea_newGene_5806	0.494372	1.08156	0.80359	3.83195	1.43026	2.22253	0.00403473	1.75549	up	--	--
gene_Bol038470	9.90979	9.20751	4.13286	16.868	13.3848	16.4726	0.00578098	1.11049	up	--	--
gene_Bol044631	6.0409	5.74318	4.99927	8.37645	8.71867	7.29264	0.0207854	0.630998	up	--	--
gene_Bol019547	1.58744	2.42021	2.51333	0.88125	1.43491	1.30224	0.0179142	-0.751138	down	K00888|0.0e+00|bna:106380477|K00888 phosphatidylinositol 4-kinase A [EC:2.7.1.67] | (RefSeq) phosphatidylinositol 4-kinase alpha 1-like isoform X1	Inositol phosphate metabolism (ko00562);; Phosphatidylinositol signaling system (ko04070)
gene_Bol028489	0.796793	0.694813	0.809175	0.220085	0.329735	0.270919	0.00458033	-1.35097	down	K13430|1.2e-71|pda:103708100|K13430 serine/threonine-protein kinase PBS1 [EC:2.7.11.1] | (RefSeq) serine/threonine-protein kinase PBS1-like	Plant-pathogen interaction (ko04626)
gene_Bol032842	0.788737	1.11892	0.770324	0.46853	0.150393	0.261846	0.0251001	-1.46383	down	K00787|5.6e-47|csat:104723383|K00787 farnesyl diphosphate synthase [EC:2.5.1.1 2.5.1.10] | (RefSeq) putative WEB family protein At4g17210	Terpenoid backbone biosynthesis (ko00900)
Brassica_oleracea_newGene_4502	2.92054	2.96483	3.54035	1.35042	1.69985	1.42485	0.020376	-0.954844	down	--	--
gene_Bol014728	72.1798	256.907	58.9657	273.997	235.219	256.837	0.0393289	1.06966	up	K13811|1.1e-270|boe:106314589|K13811 3'-phosphoadenosine 5'-phosphosulfate synthase [EC:2.7.7.4 2.7.1.25] | (RefSeq) ATP-sulfurylase 3, chloroplastic	Purine metabolism (ko00230);; Monobactam biosynthesis (ko00261);; Selenocompound metabolism (ko00450);; Sulfur metabolism (ko00920)
gene_Bol008802	8.76567	7.17504	4.13452	3.88193	3.78215	3.28351	0.0168734	-0.778846	down	K13211|0.0e+00|bna:106384959|K13211 GC-rich sequence DNA-binding factor | (RefSeq) transcriptional repressor ILP1-like	--
gene_Bol017378	128.916	64.2103	95.4108	136.819	114.875	206.959	0.0278644	0.80496	up	K00799|7.1e-62|bna:106446511|K00799 glutathione S-transferase [EC:2.5.1.18] | (RefSeq) glutathione S-transferase U11	Glutathione metabolism (ko00480)
gene_Bol032181	0.726287	4.55203	0.541693	0.196035	1.01643	0.049725	0.04446	-2.20756	down	K20617|1.1e-128|eus:EUTSA_v10010307mg|K20617 cytochrome P450 family 71 subfamily A | (RefSeq) hypothetical protein	--
gene_Bol021507	2.41155	4.66134	3.22709	0.633312	1.39173	0.518707	0.000262995	-1.95683	down	K01627|5.2e-159|bna:106353402|K01627 2-dehydro-3-deoxyphosphooctonate aldolase (KDO 8-P synthase) [EC:2.5.1.55] | (RefSeq) 2-dehydro-3-deoxyphosphooctonate aldolase 1	--
Brassica_oleracea_newGene_4085	81.1307	87.0855	82.369	57.9041	13.691	40.3487	0.0314275	-1.02253	down	K24140|6.3e-28|aly:9323063|K24140 glutaredoxin-dependent peroxiredoxin [EC:1.11.1.25] | (RefSeq) LOW QUALITY PROTEIN: peroxiredoxin-2A	--
Brassica_oleracea_newGene_3744	3.58903	3.4405	5.01696	1.94697	3.17614	1.4829	0.0343062	-0.790072	down	--	--
gene_Bol027924	2.91757	2.41648	1.50506	5.12736	2.63766	4.79269	0.0200584	1.00192	up	K18270|0.0e+00|bna:106351071|K18270 Rab3 GTPase-activating protein catalytic subunit | (RefSeq) rab3 GTPase-activating protein catalytic subunit-like isoform X1	--
gene_Bol014043	17.4974	14.0552	9.13926	22.5318	22.2038	32.157	0.00262859	1.03452	up	K09874|1.5e-183|bna:106379731|K09874 aquaporin NIP | (RefSeq) aquaporin NIP3-1-like isoform X2	--
Brassica_oleracea_newGene_3331	12.1152	11.9907	9.39396	19.3458	10.9106	17.0685	0.047987	0.629988	up	K12447|5.2e-132|thj:104808371|K12447 UDP-sugar pyrophosphorylase [EC:2.7.7.64] | (RefSeq) uncharacterized protein LOC104808371	Pentose and glucuronate interconversions (ko00040);; Galactose metabolism (ko00052);; Ascorbate and aldarate metabolism (ko00053);; Amino sugar and nucleotide sugar metabolism (ko00520)
gene_Bol025561	12.7975	21.0669	21.1587	28.0317	30.4985	23.7177	0.0229379	0.669938	up	K11254|7.1e-50|adu:107458448|K11254 histone H4 | (RefSeq) histone H4	--
gene_Bol014264	3.92836	4.05366	2.35112	4.25177	5.9855	4.93205	0.0356495	0.641844	up	K13430|7.5e-59|nta:107785708|K13430 serine/threonine-protein kinase PBS1 [EC:2.7.11.1] | (RefSeq) serine/threonine-protein kinase PBS1-like	Plant-pathogen interaction (ko04626)
gene_Bol030224	20.4741	17.9612	18.4089	39.2769	17.4312	33.7618	0.0263933	0.800718	up	K10357|5.1e-60|ppp:112286932|K10357 myosin V | (RefSeq) myosin-12-like isoform X1	--
gene_Bol014392	1002.64	913.576	588.989	1339.21	974.599	1257.48	0.0310763	0.624072	up	--	--
gene_Bol043837	2.08844	3.43339	1.38208	4.88283	7.4703	5.57374	0.000846983	1.44772	up	--	--
Brassica_oleracea_newGene_3637	20.0746	21.637	19.8224	37.7029	28.4579	29.6469	0.00113885	0.745267	up	--	--
gene_Bol038001	6.39343	7.44486	6.77438	5.04044	3.00795	3.00977	0.0164229	-0.794525	down	K11279|1.1e-156|boe:106313192|K11279 nucleosome assembly protein 1-like 1 | (RefSeq) nucleosome assembly protein 1;3 isoform X1	--
gene_Bol032037	0.88139	1.55716	1.40506	7.10847	0.39629	3.69528	0.0455943	1.68672	up	K16226|2.0e-36|bna:106437687|K16226 disease resistance protein RPS4 | (RefSeq) disease resistance protein RPS4-like	Plant-pathogen interaction (ko04626)
gene_Bol038198	26.6816	44.737	70.973	5.54001	22.41	10.5475	0.0004912	-1.82173	down	K23544|5.6e-19|brp:103842861|K23544 serine incorporator 1/3 | (RefSeq) serine incorporator 3	--
gene_Bol036546	4.05589	5.36933	18.319	0.634893	5.50803	1.75186	0.0231821	-1.75932	down	--	--
Brassica_oleracea_newGene_4050	152.452	143.424	208.981	125.854	69.3586	72.7626	0.00906441	-0.80149	down	K03038|1.7e-22|bna:106441478|K03038 26S proteasome regulatory subunit N8 | (RefSeq) uncharacterized protein LOC106441478	Proteasome (ko03050)
gene_Bol045599	483.62	356.581	360.572	752.139	753.784	791.256	1.48e-07	1.04302	up	K01188|3.7e-280|boe:106307383|K01188 beta-glucosidase [EC:3.2.1.21] | (RefSeq) beta-glucosidase 16 isoform X1	Cyanoamino acid metabolism (ko00460);; Starch and sucrose metabolism (ko00500);; Phenylpropanoid biosynthesis (ko00940)
Brassica_oleracea_newGene_5141	2.83849	2.06738	5.92599	0.141442	2.55401	0.396458	0.0365364	-1.77706	down	--	--
Brassica_oleracea_newGene_10977	1.80758	1.67184	1.81855	3.23083	3.02173	2.53247	0.00595472	0.827033	up	--	--
gene_Bol006362	0.776076	0.990196	0.246433	1.55426	4.25421	3.96274	0.000153081	2.34226	up	K20770|6.2e-118|gra:105789196|K20770 (+)-delta-cadinene 8-hydroxylase [EC:1.14.-.-] | (RefSeq) flavonoid 3'-monooxygenase-like	--
gene_Bol041261	4.11146	2.02538	2.72874	4.27715	4.02779	4.59835	0.0494949	0.654381	up	--	--
gene_Bol029277	9.21123	9.63911	7.03851	12.2753	14.1673	11.921	0.00457826	0.655701	up	K04498|1.0e-51|boe:106311719|K04498 E1A/CREB-binding protein [EC:2.3.1.48] | (RefSeq) histone acetyltransferase HAC12-like isoform X1	--
gene_Bol044353	6.14388	9.79841	4.83181	9.27441	12.1908	9.98283	0.0457465	0.68218	up	K19892|1.8e-54|boe:106295886|K19892 glucan endo-1,3-beta-glucosidase 4 [EC:3.2.1.39] | (RefSeq) glucan endo-1,3-beta-glucosidase 4	Starch and sucrose metabolism (ko00500)
gene_Bol028841	8.07837	8.27654	11.6104	3.24771	5.63483	3.55434	0.000133124	-1.08413	down	K01858|2.2e-293|boe:106313290|K01858 myo-inositol-1-phosphate synthase [EC:5.5.1.4] | (RefSeq) inositol-3-phosphate synthase	Inositol phosphate metabolism (ko00562)
gene_Bol015899	4.47158	4.03454	1.56331	6.42002	9.82194	8.78718	0.00143178	1.40025	up	K12900|1.7e-27|lang:109341833|K12900 FUS-interacting serine-arginine-rich protein 1 | (RefSeq) serine/arginine-rich SC35-like splicing factor SCL30A	Spliceosome (ko03040)
gene_Bol007271	8.13448	8.17921	7.965	13.1793	9.82947	11.4064	0.0111108	0.610715	up	K11844|3.9e-09|cmo:103483482|K11844 ubiquitin carboxyl-terminal hydrolase 16/45 [EC:3.4.19.12] | (RefSeq) ubiquitin carboxyl-terminal hydrolase 2	--
Brassica_oleracea_newGene_11489	24.0886	22.1545	8.1546	29.5879	30.1634	31.4172	0.0328703	0.843968	up	K24104|2.8e-92|thj:104799061|K24104 GPN-loop GTPase | (RefSeq) LOW QUALITY PROTEIN: uncharacterized protein LOC104799061	--
gene_Bol013892	14.6016	17.0352	22.6424	5.5126	1.9001	10.1038	0.0164906	-1.45287	down	--	--
Brassica_oleracea_newGene_3034	0.346794	0.602799	0.323166	1.12028	1.07573	0.92122	0.000237708	1.37474	up	K22804|5.9e-19|bna:106442438|K22804 structural maintenance of chromosomes protein 6 | (RefSeq) structural maintenance of chromosomes protein 6B-like	--
gene_Bol042883	6.00199	3.89209	5.95889	3.17436	2.0163	2.24826	0.00366595	-0.973737	down	--	--
gene_Bol013130	0.957198	1.23802	0.908988	0.421302	0.219476	0.168973	0.00220657	-1.80815	down	--	--
gene_Bol012474	2.53998	2.62099	2.89244	1.29083	0.67092	0.954813	0.000906182	-1.33247	down	K08900|1.8e-138|fve:101307344|K08900 mitochondrial chaperone BCS1 | (RefSeq) putative cell division cycle ATPase	--
gene_Bol042270	11.8672	6.5246	0.854436	21.5996	8.65975	20.4471	0.0390225	1.5295	up	--	--
gene_Bol020099	6.3268	5.41055	15.5256	3.93131	6.19981	2.85473	0.0249755	-0.992651	down	K01728|1.1e-31|zju:107419134|K01728 pectate lyase [EC:4.2.2.2] | (RefSeq) pectate lyase 1-like	Pentose and glucuronate interconversions (ko00040)
gene_Bol036005	28.0172	19.8974	38.3131	15.9154	18.2565	15.0729	0.00776321	-0.705872	down	K01285|1.7e-214|bna:106384505|K01285 lysosomal Pro-X carboxypeptidase [EC:3.4.16.2] | (RefSeq) lysosomal Pro-X carboxypeptidase-like	--
gene_Bol011992	3.57894	5.58634	19.4766	1.72818	3.50479	2.21158	0.00610667	-1.83202	down	--	--
gene_Bol029484	9.13547	9.35707	15.1727	6.69427	6.00907	4.1949	0.00346721	-0.899568	down	K13691|2.2e-230|bna:106438197|K13691 pathogen-inducible salicylic acid glucosyltransferase [EC:2.4.1.-] | (RefSeq) UDP-glycosyltransferase 74F2-like	--
gene_Bol015778	6.72909	7.5345	6.12043	13.0848	15.479	15.0494	1.33e-08	1.1933	up	K08202|3.1e-26|cic:CICLE_v10007977mg|K08202 MFS transporter, OCT family, solute carrier family 22 (organic cation transporter), member 4/5 | (RefSeq) hypothetical protein	--
gene_Bol029036	8.61062	11.6145	7.35852	3.71802	6.5456	5.66225	0.0413016	-0.704154	down	K00434|4.2e-161|boe:106324893|K00434 L-ascorbate peroxidase [EC:1.11.1.11] | (RefSeq) L-ascorbate peroxidase 5, peroxisomal	Ascorbate and aldarate metabolism (ko00053);; Glutathione metabolism (ko00480)
gene_Bol030909	2.68758	1.92391	1.67323	0.742183	1.28195	0.838735	0.0115008	-1.02872	down	K05350|3.4e-299|bna:111197881|K05350 beta-glucosidase [EC:3.2.1.21] | (RefSeq) beta-glucosidase 43 isoform X1	Cyanoamino acid metabolism (ko00460);; Starch and sucrose metabolism (ko00500);; Phenylpropanoid biosynthesis (ko00940)
gene_Bol018620	30.0892	33.021	29.8169	64.4723	38.0706	55.4334	0.00157741	0.884213	up	K13260|1.4e-180|bna:106391411|K13260 isoflavone/4'-methoxyisoflavone 2'-hydroxylase [EC:1.14.14.90 1.14.14.89] | (RefSeq) cytochrome P450 81D11-like	Isoflavonoid biosynthesis (ko00943)
gene_Bol030279	0.800267	1.11668	1.12832	0.097823	0.053541	0.300807	0.000490307	-2.50698	down	K05391|0.0e+00|boe:106313327|K05391 cyclic nucleotide gated channel, plant | (RefSeq) cyclic nucleotide-gated ion channel 1-like isoform X1	Plant-pathogen interaction (ko04626)
gene_Bol043096	10.7446	9.06633	12.7119	7.39615	5.8473	6.11994	0.00905141	-0.637292	down	K00975|5.4e-292|boe:106306075|K00975 glucose-1-phosphate adenylyltransferase [EC:2.7.7.27] | (RefSeq) glucose-1-phosphate adenylyltransferase small subunit, chloroplastic	Starch and sucrose metabolism (ko00500);; Amino sugar and nucleotide sugar metabolism (ko00520)
gene_Bol025807	4.06407	3.78202	6.27759	1.70352	3.61224	1.81385	0.0327675	-0.900123	down	K21343|2.5e-65|thj:104810942|K21343 ubiquitin carboxyl-terminal hydrolase 15 [EC:3.4.19.12] | (RefSeq) ubiquitin carboxyl-terminal hydrolase 8 isoform X1	--
Brassica_oleracea_newGene_3749	134.146	127.725	120.147	198.781	141.476	194.757	0.0101678	0.607566	up	K09753|7.7e-35|ini:109164697|K09753 cinnamoyl-CoA reductase [EC:1.2.1.44] | (RefSeq) cinnamoyl-CoA reductase 1-like	Phenylpropanoid biosynthesis (ko00940)
gene_Bol043503	48.8173	34.3332	18.7001	68.7641	55.9992	83.5048	0.00305834	1.15146	up	--	--
Brassica_oleracea_newGene_3264	46.7992	45.8154	37.6238	18.837	46.4461	17.0324	0.0336872	-0.760158	down	--	--
gene_Bol026326	9.80477	7.64221	14.3089	5.09399	5.6227	4.07686	0.00101018	-1.00691	down	K06944|7.4e-181|bna:106402858|K06944 uncharacterized protein | (RefSeq) developmentally-regulated G-protein 2	--
gene_Bol043451	13.2644	9.99114	6.13916	14.651	20.8233	11.0547	0.0464877	0.736968	up	K13464|6.2e-103|bna:106372313|K13464 jasmonate ZIM domain-containing protein | (RefSeq) protein TIFY 9 isoform X1	Plant hormone signal transduction (ko04075)
gene_Bol006646	9.59174	8.75582	11.3249	6.36736	7.88977	4.04497	0.0194252	-0.616935	down	K14684|1.8e-276|bna:106421948|K14684 solute carrier family 25 (mitochondrial phosphate transporter), member 23/24/25/41 | (RefSeq) calcium-binding mitochondrial carrier protein SCaMC-3-like	--
gene_Bol037168	27.1327	21.618	19.989	32.9349	26.964	39.9049	0.0144656	0.659816	up	K09486|0.0e+00|boe:106305980|K09486 hypoxia up-regulated 1 | (RefSeq) heat shock 70 kDa protein 17-like	Protein processing in endoplasmic reticulum (ko04141)
gene_Bol043377	11.1068	10.3074	11.7705	13.4897	27.3337	12.9888	0.00900465	0.762707	up	K01052|6.9e-205|aly:9309722|K01052 lysosomal acid lipase/cholesteryl ester hydrolase [EC:3.1.1.13] | (RefSeq) triacylglycerol lipase 2 isoform X1	Steroid biosynthesis (ko00100)
gene_Bol028321	9.9134	10.4264	15.176	6.27408	6.61354	6.04224	0.0022606	-0.807382	down	K03787|1.9e-175|bna:106435433|K03787 5'-nucleotidase [EC:3.1.3.5] | (RefSeq) uncharacterized protein LOC106435433	Purine metabolism (ko00230);; Pyrimidine metabolism (ko00240);; Nicotinate and nicotinamide metabolism (ko00760)
gene_Bol006572	216.269	233.866	174.647	347.713	223.989	364.066	0.0162397	0.705242	up	K03444|1.9e-254|bna:106362332|K03444 MFS transporter, SP family, ERD6-like sugar transporter | (RefSeq) sugar transporter ERD6-like 3	--
gene_Bol022048	3.66349	1.97827	2.04188	3.36209	3.57204	8.59446	0.045602	1.1563	up	K10773|1.5e-14|egu:105039152|K10773 endonuclease III [EC:4.2.99.18] | (RefSeq) putative DNA glycosylase At3g47830 isoform X1	Base excision repair (ko03410)
gene_Bol037212	15.4317	16.8403	15.0834	7.12419	12.3957	7.0415	0.00310533	-0.760126	down	K08726|2.2e-129|jcu:105643456|K08726 soluble epoxide hydrolase / lipid-phosphate phosphatase [EC:3.3.2.10 3.1.3.76] | (RefSeq) uncharacterized protein LOC105643456	Arachidonic acid metabolism (ko00590);; Peroxisome (ko04146)
gene_Bol021460	41.6746	41.4491	49.7931	16.9343	40.1398	15.3928	0.0139232	-0.820703	down	--	--
Brassica_oleracea_newGene_4330	0.341545	0.186112	0.404276	0.732188	1.1292	1.25791	0.00149195	1.55322	up	--	--
Brassica_oleracea_newGene_11983	538.033	937.01	1923.97	369.224	109.396	389.466	0.00126576	-1.81282	down	K01183|2.6e-160|boe:106329425|K01183 chitinase [EC:3.2.1.14] | (RefSeq) basic endochitinase CHB4	Amino sugar and nucleotide sugar metabolism (ko00520)
gene_Bol035118	6.46847	9.93486	4.31411	15.3843	12.1822	12.4129	0.00411263	1.04292	up	K06636|1.9e-14|ppp:112291699|K06636 structural maintenance of chromosome 1 | (RefSeq) structural maintenance of chromosomes protein 2-2-like	--
gene_Bol008224	5.99118	4.84859	6.15229	22.1813	3.24887	23.1341	0.0074342	1.6787	up	K13691|5.3e-121|nto:104120845|K13691 pathogen-inducible salicylic acid glucosyltransferase [EC:2.4.1.-] | (RefSeq) UDP-glycosyltransferase 74G1-like	--
gene_Bol011132	5.20509	3.97328	2.10674	8.0425	7.44681	7.56251	0.0066062	1.12199	up	--	--
gene_Bol013657	28.8886	37.7818	84.7039	139.151	101.5	72.6569	0.00583368	1.14961	up	K03527|4.1e-270|bna:106401636|K03527 4-hydroxy-3-methylbut-2-en-1-yl diphosphate reductase [EC:1.17.7.4] | (RefSeq) 4-hydroxy-3-methylbut-2-enyl diphosphate reductase, chloroplastic	Terpenoid backbone biosynthesis (ko00900)
gene_Bol034559	1.50079	7.10355	3.35802	0.788639	2.22921	0.260731	0.0133616	-1.84464	down	K17471|0.0e+00|bna:106386755|K17471 sulfate transporter 3 | (RefSeq) probable sulfate transporter 3.5 isoform X1	--
gene_Bol021221	3.60651	5.86901	6.86109	29.8262	2.81704	29.9929	0.0063382	2.0941	up	--	--
Brassica_oleracea_newGene_2452	1.68911	1.50654	2.84258	0.973735	1.50764	0.652606	0.0468273	-0.850824	down	K01322|1.4e-13|csat:104767606|K01322 prolyl oligopeptidase [EC:3.4.21.26] | (RefSeq) putative F-box/LRR-repeat protein At3g18150	--
gene_Bol004888	31.473	24.4709	46.8446	13.75	24.082	13.6274	0.00267049	-0.917882	down	K20660|2.4e-303|bna:106396655|K20660 cytochrome P450 family 709 | (RefSeq) cytochrome P450 709B2	--
gene_Bol044367	6.44402	4.8456	3.97219	11.7083	11.8718	8.41797	2.48e-05	1.1535	up	--	--
Brassica_oleracea_newGene_4067	1.30924	1.2932	0.790641	0.357262	0.438219	0.315053	0.000668954	-1.51412	down	--	--
gene_Bol027181	38.5052	54.1773	46.7433	98.5762	64.98	193.336	0.00055514	1.50494	up	K20858|9.7e-186|boe:106306769|K20858 calcium uniporter protein, mitochondrial | (RefSeq) calcium uniporter protein 3, mitochondrial-like	--
gene_Bol010446	3.0568	5.04197	4.67845	2.11524	2.82989	2.17531	0.0171305	-0.749977	down	--	--
gene_Bol015129	5.10111	7.03593	7.25593	2.36002	4.36873	1.94849	0.00317543	-1.08537	down	K03188|7.4e-40|dcr:108224146|K03188 urease accessory protein | (RefSeq) uncharacterized protein LOC108224146 isoform X1	--
Brassica_oleracea_newGene_11911	12.8992	20.1086	12.7673	6.10635	2.3949	7.58357	0.00511257	-1.36751	down	--	--
gene_Bol040444	6.59686	8.79128	21.5255	3.89961	2.61862	1.28313	0.00125497	-2.12352	down	K11517|1.9e-26|bna:111197760|K11517 (S)-2-hydroxy-acid oxidase [EC:1.1.3.15] | (RefSeq) peroxisomal (S)-2-hydroxy-acid oxidase GLO3-like isoform X1	Glyoxylate and dicarboxylate metabolism (ko00630);; Carbon metabolism (ko01200);; Peroxisome (ko04146)
gene_Bol018418	47.1039	29.3306	22.5434	88.0965	25.3959	96.1511	0.0193717	1.23436	up	--	--
gene_Bol041196	3.34033	2.5841	2.71282	0.715834	1.07169	0.309864	3.7e-07	-1.98088	down	K02324|0.0e+00|boe:106295016|K02324 DNA polymerase epsilon subunit 1 [EC:2.7.7.7] | (RefSeq) DNA polymerase epsilon catalytic subunit A isoform X1	DNA replication (ko03030);; Base excision repair (ko03410);; Nucleotide excision repair (ko03420)
gene_Bol017122	1.78398	2.19513	4.54385	0.799108	1.30699	0.329056	0.00293288	-1.73483	down	K13412|4.2e-273|bna:111207849|K13412 calcium-dependent protein kinase [EC:2.7.11.1] | (RefSeq) calcium-dependent protein kinase 12-like	Plant-pathogen interaction (ko04626)
gene_Bol030730	2.07347	1.56077	2.51025	0.599218	0.400856	0.508766	2.53e-05	-1.89801	down	K02552|9.1e-265|bna:106419194|K02552 menaquinone-specific isochorismate synthase [EC:5.4.4.2] | (RefSeq) isochorismate synthase 2, chloroplastic	Ubiquinone and other terpenoid-quinone biosynthesis (ko00130)
gene_Bol038202	7.31224	5.36792	5.17811	11.5713	9.34244	13.4953	0.000371519	1.06654	up	K14497|3.1e-23|oeu:111404627|K14497 protein phosphatase 2C [EC:3.1.3.16] | (RefSeq) probable protein phosphatase 2C 75	MAPK signaling pathway - plant (ko04016);; Plant hormone signal transduction (ko04075)
gene_Bol020385	7.31901	8.50072	14.0693	4.24845	7.83986	2.63712	0.0187612	-0.964363	down	--	--
gene_Bol035509	6.06274	4.7744	11.6649	2.92123	3.18112	2.42235	0.000186976	-1.29899	down	K05666|0.0e+00|cit:102618233|K05666 ATP-binding cassette, subfamily C (CFTR/MRP), member 2 | (RefSeq) ABC transporter C family member 3-like isoform X1	ABC transporters (ko02010)
gene_Bol009357	11.7528	10.5833	7.84469	15.7988	31.9455	15.4378	0.00061266	1.12776	up	K08235|3.8e-143|boe:106305426|K08235 xyloglucan:xyloglucosyl transferase [EC:2.4.1.207] | (RefSeq) probable xyloglucan endotransglucosylase/hydrolase protein 29	--
gene_Bol024593	24.9076	26.9572	34.998	17.7831	22.082	13.9281	0.00526549	-0.606257	down	K02133|5.3e-251|bna:106377686|K02133 F-type H+-transporting ATPase subunit beta [EC:7.1.2.2] | (RefSeq) ATP synthase subunit beta-2, mitochondrial	Oxidative phosphorylation (ko00190)
gene_Bol005282	13.3515	15.2978	16.7001	8.82468	11.7508	7.08249	0.0105996	-0.631812	down	--	--
Brassica_oleracea_newGene_5161	91.0394	62.0759	168.892	34.6335	10.1336	17.398	5.28e-06	-2.25217	down	--	--
gene_Bol043543	7.67626	7.02158	11.6834	3.61574	4.07094	4.98587	0.00522328	-0.940814	down	--	--
Brassica_oleracea_newGene_2132	7.15048	6.71322	9.62087	2.82698	4.0995	3.17826	5.75e-05	-1.12121	down	--	--
gene_Bol010488	4.25885	2.77905	6.24583	24.2253	2.46621	8.25303	0.0363175	1.53254	up	--	--
gene_Bol019481	28.3937	29.1924	13.0729	43.0466	28.3329	43.2603	0.0372114	0.814352	up	K09873|2.5e-136|bna:106404516|K09873 aquaporin TIP | (RefSeq) aquaporin TIP2-1	--
gene_Bol021783	29.9852	31.2312	23.9199	43.2886	33.9776	43.3832	0.0118186	0.615342	up	K14544|5.3e-83|csl:COCSUDRAFT_65874|K14544 U3 small nucleolar RNA-associated protein 22 | (RefSeq) hypothetical protein	Ribosome biogenesis in eukaryotes (ko03008)
gene_Bol035967	14.4264	17.2589	24.3052	11.1015	14.691	9.10323	0.0267334	-0.597829	down	K02925|1.8e-223|bna:106418390|K02925 large subunit ribosomal protein L3e | (RefSeq) 60S ribosomal protein L3-1-like isoform X1	Ribosome (ko03010)
gene_Bol007662	12.9694	9.92917	11.7113	6.10858	6.71009	6.67301	0.000628358	-0.722881	down	K19891|1.6e-77|smo:SELMODRAFT_442025|K19891 glucan endo-1,3-beta-glucosidase 1/2/3 [EC:3.2.1.39] | (RefSeq) hypothetical protein	Starch and sucrose metabolism (ko00500)
gene_Bol032993	9.93633	13.8288	11.2501	5.10497	4.19184	5.25597	0.000216093	-1.15537	down	K01673|1.2e-115|bna:106418601|K01673 carbonic anhydrase [EC:4.2.1.1] | (RefSeq) beta carbonic anhydrase 4 isoform X1	Nitrogen metabolism (ko00910)
gene_Bol021782	4.26393	3.13502	1.89579	4.28989	6.55645	5.48395	0.0217669	0.898221	up	K19041|6.8e-58|nau:109226804|K19041 E3 ubiquitin-protein ligase RNF38/44 [EC:2.3.2.27] | (RefSeq) RING-H2 finger protein ATL20-like	--
gene_Bol022447	4.43739	2.31923	3.09797	7.97045	6.33209	7.5091	0.000844609	1.25358	up	K06268|2.3e-122|bna:106412403|K06268 serine/threonine-protein phosphatase 2B regulatory subunit | (RefSeq) calcineurin B-like protein 4	--
gene_Bol020523	1.52574	1.14592	2.41608	0.622579	0.77214	0.697718	0.0289133	-1.1482	down	--	--
Brassica_oleracea_newGene_4296	14.672	13.1825	11.946	5.98268	9.44999	6.46024	0.00139343	-0.790809	down	--	--
gene_Bol042753	1.83122	1.19896	2.06558	0.90278	0.875314	0.421712	0.0259424	-1.12017	down	K03456|1.2e-12|pda:103702393|K03456 serine/threonine-protein phosphatase 2A regulatory subunit A | (RefSeq) serine/threonine-protein phosphatase 2A 65 kDa regulatory subunit A beta isoform-like	mRNA surveillance pathway (ko03015)
gene_Bol007115	73.845	68.0285	36.4627	78.0734	97.5717	95.3726	0.021844	0.700724	up	--	--
gene_Bol039117	3.79038	4.18469	2.43539	3.99897	6.4192	5.65949	0.0377388	0.71509	up	K06636|7.1e-14|ppp:112291699|K06636 structural maintenance of chromosome 1 | (RefSeq) structural maintenance of chromosomes protein 2-2-like	--
gene_Bol022387	14.1739	5.86265	12.5996	3.99727	5.50568	5.17912	0.00557428	-1.0445	down	K20661|3.3e-228|bna:106407323|K20661 cytochrome P450 family 714 subfamily A polypeptide 1 | (RefSeq) cytochrome P450 714A1	--
gene_Bol042983	1.94172	2.40538	2.6827	0.40742	1.61429	0.67594	0.0150151	-1.31103	down	--	--
gene_Bol025385	15.2089	16.8653	13.8152	31.5661	29.8611	26.5887	5e-08	1.03597	up	K08915|6.1e-101|eus:EUTSA_v10017060mg|K08915 light-harvesting complex II chlorophyll a/b binding protein 4 | (RefSeq) hypothetical protein	Photosynthesis - antenna proteins (ko00196)
Brassica_oleracea_newGene_5714	0.384771	0.9976	0.301977	3.68037	3.14376	0.694876	0.000502246	2.21497	up	--	--
gene_Bol021947	4.66708	2.57594	6.50134	12.9048	5.56384	6.1683	0.0493266	0.959365	up	--	--
gene_Bol021601	24.4566	24.3193	19.8165	41.5557	29.0325	33.7374	0.00423795	0.71401	up	K09419|4.0e-60|spen:107005729|K09419 heat shock transcription factor, other eukaryote | (RefSeq) heat stress transcription factor A-5 isoform X1	--
gene_Bol042154	1.12189	1.72079	0.956487	2.22483	3.30106	1.6414	0.0443897	0.976003	up	K12173|3.8e-40|gmx:100794341|K12173 BRCA1-A complex subunit BRE | (RefSeq) BRISC and BRCA1-A complex member 2	Homologous recombination (ko03440)
gene_Bol037861	3.68452	3.21701	5.61345	2.60059	2.13562	1.38969	0.025783	-0.926259	down	K03189|3.8e-151|boe:106342116|K03189 urease accessory protein | (RefSeq) urease accessory protein G	--
gene_Bol040177	6.04536	2.98383	1.10703	7.04043	5.30486	12.0566	0.0242003	1.4059	up	K13418|2.9e-47|smo:SELMODRAFT_167872|K13418 somatic embryogenesis receptor kinase 1 [EC:2.7.10.1 2.7.11.1] | (RefSeq) hypothetical protein	--
gene_Bol023894	7.17346	9.54271	21.6486	5.18283	2.15139	5.47421	0.00913092	-1.43189	down	K09338|1.1e-135|bna:106402717|K09338 homeobox-leucine zipper protein | (RefSeq) homeobox-leucine zipper protein ATHB-13	--
gene_Bol016157	30.7624	37.3291	46.4072	17.7066	27.1593	23.8402	0.00967351	-0.640331	down	K24139|3.3e-248|bna:106406618|K24139 auxin efflux carrier family protein | (RefSeq) BNAC06G32240D; protein PIN-LIKES 2	--
Brassica_oleracea_newGene_11723	9.46532	9.32006	7.1361	3.55072	2.78788	3.94238	1.87e-05	-1.19537	down	--	--
gene_Bol034705	4.20778	3.06934	6.42158	0.982664	0.445501	2.95111	0.0490656	-1.44451	down	--	--
gene_Bol008859	220.212	240.63	212.278	150.494	61.8894	88.0461	0.00302144	-1.04573	down	K07304|5.9e-91|brp:103856844|K07304 peptide-methionine (S)-S-oxide reductase [EC:1.8.4.11] | (RefSeq) peptide methionine sulfoxide reductase A2 isoform X1	--
Brassica_oleracea_newGene_5239	0.418424	0.916697	0.394014	0.051367	0.217483	0.283367	0.0380666	-1.62056	down	K11684|6.6e-20|lang:109325171|K11684 bromodomain-containing factor 1 | (RefSeq) transcription factor GTE4-like	--
Brassica_oleracea_newGene_5162	137.889	128.975	254.692	76.8327	36.2712	29.5977	2.29e-05	-1.76141	down	--	--
gene_Bol028526	76.8952	73.7491	52.5539	112.232	74.0087	120.442	0.0197602	0.716667	up	K01087|4.8e-213|boe:106322665|K01087 trehalose 6-phosphate phosphatase [EC:3.1.3.12] | (RefSeq) probable trehalose-phosphate phosphatase G	Starch and sucrose metabolism (ko00500)
gene_Bol043423	0.818142	0.67908	0.879764	0.245966	0.119419	0.096678	0.000156068	-2.24628	down	K05681|1.4e-94|aip:107621880|K05681 ATP-binding cassette, subfamily G (WHITE), member 2 | (RefSeq) ABC transporter G family member 5-like	ABC transporters (ko02010)
gene_Bol024496	8.00199	7.43042	19.8081	2.99752	8.52598	2.99255	0.0225348	-1.21995	down	K08081|3.6e-146|boe:106327730|K08081 tropinone reductase I [EC:1.1.1.206] | (RefSeq) tropinone reductase homolog At5g06060	Tropane, piperidine and pyridine alkaloid biosynthesis (ko00960)
gene_Bol008411	2.92521	4.00637	3.55835	1.22839	2.78443	0.948089	0.0317682	-1.02213	down	K20043|1.0e-27|aip:107640400|K20043 clathrin coat assembly protein AP180 | (RefSeq) putative clathrin assembly protein At5g35200	--
gene_Bol016483	10.2181	6.97788	7.0601	20.754	13.9738	20.4747	1.9e-05	1.30742	up	K00511|9.1e-295|boe:106323003|K00511 squalene monooxygenase [EC:1.14.14.17] | (RefSeq) squalene epoxidase 4-like	Steroid biosynthesis (ko00100);; Sesquiterpenoid and triterpenoid biosynthesis (ko00909)
gene_Bol013632	25.4718	37.471	39.4593	20.5521	19.215	22.6745	0.0191556	-0.603892	down	K23260|1.3e-290|bna:106438574|K23260 scopoletin glucosyltransferase [EC:2.4.1.128] | (RefSeq) UDP-glycosyltransferase 73B1 isoform X1	Phenylpropanoid biosynthesis (ko00940)
gene_Bol022341	1.2032	1.06726	2.15372	0.192632	0.515663	0.566121	0.0137658	-1.6372	down	K09510|1.1e-184|bna:106366798|K09510 DnaJ homolog subfamily B member 4 | (RefSeq) dnaJ homolog subfamily B member 1-like	--
Brassica_oleracea_newGene_11121	1.8711	1.87139	1.71857	0.814901	0.481028	0.731531	0.0134086	-1.29581	down	K15446|5.0e-09|nta:107829617|K15446 tRNA:m4X modification enzyme [EC:2.1.1.225] | (RefSeq) tRNA:m(4)X modification enzyme TRM13 homolog	--
gene_Bol006895	1.04894	1.37686	1.08255	0.432318	0.529704	0.426473	0.0182368	-1.19011	down	K17500|3.8e-51|nto:104085001|K17500 integrin-linked kinase-associated serine/threonine phosphatase 2C [EC:3.1.3.16] | (RefSeq) WAT1-related protein At3g18200 isoform X1	--
gene_Bol018515	3.83303	3.07221	3.90418	5.17022	7.65747	4.93131	0.0346374	0.793862	up	K01244|4.8e-59|bna:106410453|K01244 5'-methylthioadenosine nucleosidase [EC:3.2.2.16] | (RefSeq) 5'-methylthioadenosine/S-adenosylhomocysteine nucleosidase 1	Cysteine and methionine metabolism (ko00270)
gene_Bol029920	31.6773	26.8657	16.1151	32.841	40.9344	44.9153	0.0160851	0.772044	up	K07904|5.1e-106|bna:106372993|K07904 Ras-related protein Rab-11A | (RefSeq) ras-related protein RABA1e	Endocytosis (ko04144)
gene_Bol024493	5.47566	2.94216	3.18011	5.52597	10.8522	3.73967	0.0456529	0.848688	up	K00809|9.5e-204|brp:103850601|K00809 deoxyhypusine synthase [EC:2.5.1.46] | (RefSeq) deoxyhypusine synthase-like isoform X2	--
gene_Bol019702	19.445	18.9765	16.5596	40.0882	14.9969	33.1302	0.044905	0.814974	up	K16302|2.2e-31|apro:F751_6247|K16302 metal transporter CNNM | (RefSeq) Protein MAM3	--
gene_Bol012520	5.35904	6.65258	8.64926	3.5665	2.93877	1.79191	0.000544346	-1.21933	down	K13205|2.2e-224|bna:106348575|K13205 A1 cistron-splicing factor AAR2 | (RefSeq) protein AAR2 homolog	--
gene_Bol015147	2.22199	2.57014	2.41042	4.63932	3.37446	3.75051	0.0109155	0.80813	up	K00521|2.1e-89|cmos:111447866|K00521 ferric-chelate reductase [EC:1.16.1.7] | (RefSeq) ferric reduction oxidase 7, chloroplastic-like	--
gene_Bol028994	8.81566	12.5012	11.8087	26.8995	13.9407	28.2236	0.00363411	1.18867	up	--	--
gene_Bol028756	1.61261	2.01903	1.73083	5.37333	2.72053	11.6852	0.00071431	2.02935	up	K09422|3.0e-151|bna:106449675|K09422 transcription factor MYB, plant | (RefSeq) myb-related protein Myb4-like	--
gene_Bol026261	29.5578	21.5247	58.9915	9.59728	15.8857	20.4625	0.009312	-1.13443	down	K01054|2.8e-230|boe:106307377|K01054 acylglycerol lipase [EC:3.1.1.23] | (RefSeq) monoglyceride lipase-like	Glycerolipid metabolism (ko00561)
gene_Bol033179	75.9028	59.7843	44.0549	95.3175	111.763	95.1726	0.000459863	0.844147	up	K07735|9.5e-175|bna:106382183|K07735 putative transcriptional regulator | (RefSeq) uncharacterized protein LOC106382183	--
gene_Bol036869	11.9787	7.50555	8.93726	11.8971	18.1445	14.2081	0.0176906	0.730119	up	K02886|3.7e-73|aly:32283111|K02886 large subunit ribosomal protein L2 | (RefSeq) rpl2, B9N47_pgp001; 50S ribosomal protein L2	Ribosome (ko03010)
gene_Bol044447	1.30109	2.26387	1.01234	4.9473	3.22792	2.19755	0.0329556	1.2572	up	--	--
Brassica_oleracea_newGene_5065	1.09994	1.01733	0.872706	0.555448	0.236712	0.341042	0.0469451	-1.24703	down	K10523|5.4e-19|boe:106329934|K10523 speckle-type POZ protein | (RefSeq) MATH domain and coiled-coil domain-containing protein At2g42460-like	--
Brassica_oleracea_newGene_3459	1.82425	0.140704	0.904359	5.90771	8.8961	1.09726	0.00077497	2.60375	up	--	--
gene_Bol018845	3.62459	3.19182	17.2421	1.33176	2.82934	1.91688	0.00448725	-1.88281	down	K11838|2.3e-13|psom:113323389|K11838 ubiquitin carboxyl-terminal hydrolase 7 [EC:3.4.19.12] | (RefSeq) ubiquitin carboxyl-terminal hydrolase 12-like isoform X1	--
Brassica_oleracea_newGene_8523	4.33022	3.03395	2.81724	8.18454	6.63307	5.84363	0.000131163	1.12099	up	K00993|7.3e-108|bna:106453259|K00993 ethanolaminephosphotransferase [EC:2.7.8.1] | (RefSeq) uncharacterized protein LOC106453259	Phosphonate and phosphinate metabolism (ko00440);; Glycerophospholipid metabolism (ko00564);; Ether lipid metabolism (ko00565)
gene_Bol008565	114.242	75.7741	97.8296	46.2434	51.7379	49.7309	2.67e-05	-0.857858	down	K00679|2.4e-52|cic:CICLE_v10027727mg|K00679 phospholipid:diacylglycerol acyltransferase [EC:2.3.1.158] | (RefSeq) hypothetical protein	Glycerolipid metabolism (ko00561)
gene_Bol042571	5.7196	5.05806	1.97201	7.33349	8.46547	8.40128	0.0161925	1.01697	up	--	--
gene_Bol036657	828.271	699.36	593.209	815.297	778.411	1545.9	0.0468491	0.701371	up	K24193|1.1e-300|boe:106292458|K24193 MFS transporter, SP family, sugar:H+ symporter | (RefSeq) sugar transport protein 1-like	--
gene_Bol030924	0.581449	0.301418	0.707792	1.09371	1.67828	0.898687	0.0080955	1.27805	up	--	--
gene_Bol041250	13.2463	12.019	18.1342	8.15884	10.1215	8.17515	0.00366615	-0.617011	down	K18577|0.0e+00|boe:106294903|K18577 mannosylglycoprotein endo-beta-mannosidase [EC:3.2.1.152] | (RefSeq) mannosylglycoprotein endo-beta-mannosidase	--
Brassica_oleracea_newGene_9859	7.21552	9.09757	9.33431	4.26811	3.2192	5.36426	0.00714244	-0.869768	down	K24140|1.2e-70|aly:9323063|K24140 glutaredoxin-dependent peroxiredoxin [EC:1.11.1.25] | (RefSeq) LOW QUALITY PROTEIN: peroxiredoxin-2A	--
gene_Bol027125	0.135604	0.615904	0.456347	1.55783	1.9849	1.29051	0.000624695	2.04211	up	K08176|1.2e-302|bna:106352497|K08176 MFS transporter, PHS family, inorganic phosphate transporter | (RefSeq) probable inorganic phosphate transporter 1-3	--
gene_Bol043841	19.6616	12.6733	11.3735	11.9182	97.0482	17.4947	0.0179091	1.53904	up	K08238|8.7e-111|brp:103847104|K08238 xyloglucan 6-xylosyltransferase [EC:2.4.2.39] | (RefSeq) probable xyloglucan 6-xylosyltransferase 3	--
gene_Bol009952	5.49628	9.76673	8.33253	1.50801	3.5179	3.22605	0.00233192	-1.41786	down	K13347|9.6e-106|bna:106394913|K13347 peroxisomal membrane protein 2 | (RefSeq) peroxisomal membrane protein PMP22	Peroxisome (ko04146)
gene_Bol025511	3.98247	3.01524	4.63546	3.93129	9.40855	5.1853	0.0439571	0.744252	up	--	--
gene_Bol009540	7.9982	11.5172	18.7416	4.75594	7.58839	5.53892	0.00706539	-1.00422	down	--	--
gene_Bol018290	12.1383	7.7775	6.14831	15.2813	12.0606	25.4178	0.00859089	1.1532	up	K07904|1.0e-106|aly:9325632|K07904 Ras-related protein Rab-11A | (RefSeq) ras-related protein RABA5e	Endocytosis (ko04144)
gene_Bol009638	18.5029	16.8217	23.6464	9.14773	12.9299	6.47982	0.000319363	-0.969556	down	--	--
gene_Bol020368	24.4119	39.0312	29.6241	18.7231	10.1143	19.861	0.0350307	-0.806677	down	K03239|2.0e-16|ath:AT1G53900|K03239 translation initiation factor eIF-2B subunit alpha | (RefSeq) Eukaryotic translation initiation factor 2B (eIF-2B) family protein	RNA transport (ko03013)
gene_Bol040423	9.76715	7.80659	9.16889	13.1477	15.8259	12.9261	0.00963524	0.742791	up	--	--
gene_Bol027135	1.09713	4.22009	3.87809	0.723435	1.38456	0.456812	0.0117449	-1.75378	down	--	--
gene_Bol032438	22.1916	16.9437	24.6975	35.0887	46.609	31.5668	7.69e-06	0.915613	up	--	--
Brassica_oleracea_newGene_10795	1.69765	2.12884	1.06537	4.4373	1.41316	5.68707	0.030187	1.51456	up	--	--
gene_Bol035639	22.9469	15.0939	12.2016	22.2094	30.4542	21.1106	0.0382836	0.63889	up	K02992|1.7e-79|aly:32283061|K02992 small subunit ribosomal protein S7 | (RefSeq) rps7, B9N47_pgp022; 30S ribosomal protein S7	Ribosome (ko03010)
gene_Bol043674	41.1833	42.2286	52.2146	28.759	34.4559	20.368	0.00435015	-0.614973	down	K02991|2.5e-133|bna:106405975|K02991 small subunit ribosomal protein S6e | (RefSeq) 40S ribosomal protein S6-2	Ribosome (ko03010)
Brassica_oleracea_newGene_4041	5.76527	3.12163	8.0103	2.5602	1.42866	1.967	0.00109892	-1.37363	down	K03189|1.6e-07|bna:106398968|K03189 urease accessory protein | (RefSeq) urease accessory protein G-like	--
Brassica_oleracea_newGene_9105	1.88784	1.27683	1.61141	4.86667	3.31089	1.48406	0.0430017	0.946176	up	K07304|8.8e-16|cann:107874243|K07304 peptide-methionine (S)-S-oxide reductase [EC:1.8.4.11] | (RefSeq) peptide methionine sulfoxide reductase-like	--
gene_Bol007100	7.77321	10.0178	15.4777	2.70984	2.58494	2.61685	5.05e-09	-1.96181	down	K14454|1.5e-231|boe:106322507|K14454 aspartate aminotransferase, cytoplasmic [EC:2.6.1.1] | (RefSeq) aspartate aminotransferase, cytoplasmic isozyme 1	Arginine biosynthesis (ko00220);; Alanine, aspartate and glutamate metabolism (ko00250);; Cysteine and methionine metabolism (ko00270);; Arginine and proline metabolism (ko00330);; Tyrosine metabolism (ko00350);; Phenylalanine metabolism (ko00360);; Phenylalanine, tyrosine and tryptophan biosynthesis (ko00400);; Carbon fixation in photosynthetic organisms (ko00710);; Isoquinoline alkaloid biosynt…
gene_Bol025891	3.36059	2.91927	3.87483	1.74947	1.90341	1.67681	0.00289466	-0.828463	down	--	--
Brassica_oleracea_newGene_4347	9.20656	7.23103	9.53811	4.0914	6.89188	5.10895	0.0119666	-0.602929	down	--	--
Brassica_oleracea_newGene_5101	0.26518	0.301566	0.600772	2.67263	3.22648	0.375438	0.000603836	2.4567	up	--	--
gene_Bol024452	46.9035	53.0864	104.184	35.1967	13.9112	32.4445	0.00965885	-1.17948	down	K03844|3.4e-36|mng:MNEG_1379|K03844 alpha-1,2-mannosyltransferase [EC:2.4.1.131] | (RefSeq) alpha-1,2-mannosyltransferase	N-Glycan biosynthesis (ko00510);; Various types of N-glycan biosynthesis (ko00513)
gene_Bol034378	2.03754	3.19834	1.04063	1.1153	0.891836	0.39659	0.0306799	-1.30759	down	K13418|3.4e-54|ppp:112278174|K13418 somatic embryogenesis receptor kinase 1 [EC:2.7.10.1 2.7.11.1] | (RefSeq) LRR receptor kinase BAK1-like	--
gene_Bol035942	161.855	120.455	144.533	228.137	152.487	234.462	0.0170114	0.652749	up	K01723|2.2e-304|bna:106446378|K01723 hydroperoxide dehydratase [EC:4.2.1.92] | (RefSeq) allene oxide synthase, chloroplastic-like	alpha-Linolenic acid metabolism (ko00592)
gene_Bol006934	56.6645	60.4298	49.6249	75.4308	78.8687	80.8998	0.000940462	0.598555	up	K18134|5.7e-89|gab:108463406|K18134 EGF domain-specific O-GlcNAc transferase [EC:2.4.1.255] | (RefSeq) uncharacterized protein LOC108463406	Other types of O-glycan biosynthesis (ko00514)
gene_Bol022142	16.0848	12.2025	4.93991	25.9727	45.4378	27.7548	0.000206481	1.64934	up	--	--
Brassica_oleracea_newGene_11163	0.714424	0.686467	2.04345	0	0.208022	0	0.00170062	-4.00242	down	--	--
gene_Bol040839	37.8847	30.2369	23.8538	57.7662	45.4625	57.3681	0.000539069	0.917688	up	K08819|1.6e-118|gmx:100775462|K08819 cyclin-dependent kinase 12/13 [EC:2.7.11.22 2.7.11.23] | (RefSeq) probable serine/threonine-protein kinase At1g54610	--
gene_Bol015039	19.8039	11.7633	7.9339	21.3189	105.695	24.8415	0.000536922	1.96492	up	K16815|8.0e-12|gsl:Gasu_03780|K16815 calcium-independent phospholipase A2-gamma | (RefSeq) hypothetical protein	--
gene_Bol009568	89.0944	79.7223	71.3584	135.619	75.018	159.414	0.026569	0.759063	up	K09487|0.0e+00|bna:106376022|K09487 heat shock protein 90kDa beta | (RefSeq) endoplasmin homolog	Protein processing in endoplasmic reticulum (ko04141);; Plant-pathogen interaction (ko04626)
Brassica_oleracea_newGene_139	1.31469	0.975129	0.555251	1.27309	1.92993	1.65817	0.0310197	0.866994	up	K10398|8.2e-38|eus:EUTSA_v10016147mg|K10398 kinesin family member 11 | (RefSeq) hypothetical protein	--
gene_Bol030226	2.56081	3.26286	2.42405	3.42109	6.55027	3.04899	0.0397426	0.722064	up	K15398|0.0e+00|boe:106341840|K15398 fatty acid omega-hydroxylase [EC:1.14.-.-] | (RefSeq) cytochrome P450 86A8	Cutin, suberine and wax biosynthesis (ko00073)
gene_Bol020109	28.5696	30.4519	21.8978	41.5012	36.7079	38.963	0.00386625	0.637425	up	K06130|3.3e-146|boe:106324814|K06130 lysophospholipase II [EC:3.1.1.5] | (RefSeq) acyl-protein thioesterase 2-like	Glycerophospholipid metabolism (ko00564)
gene_Bol017370	6.99401	6.86625	17.3324	3.97488	4.02731	1.47596	0.000692224	-1.6397	down	K14638|1.5e-179|cmax:111493070|K14638 solute carrier family 15 (peptide/histidine transporter), member 3/4 | (RefSeq) protein NRT1/ PTR FAMILY 2.13-like	--
gene_Bol034760	108.594	97.189	70.2702	104.467	210.928	168.971	0.00260863	0.897671	up	K13051|2.9e-182|bna:106376850|K13051 L-asparaginase / beta-aspartyl-peptidase [EC:3.5.1.1 3.4.19.5] | (RefSeq) probable isoaspartyl peptidase/L-asparaginase 2	Alanine, aspartate and glutamate metabolism (ko00250);; Cyanoamino acid metabolism (ko00460)
gene_Bol030400	2.18647	2.385	1.2307	4.53306	4.72523	8.12144	0.000167129	1.69794	up	K09753|8.5e-37|ppp:112293893|K09753 cinnamoyl-CoA reductase [EC:1.2.1.44] | (RefSeq) cinnamoyl-CoA reductase 1-like	Phenylpropanoid biosynthesis (ko00940)
gene_Bol027866	5.85396	5.22977	7.93397	2.21502	5.48141	2.37759	0.0203247	-0.85276	down	K01228|0.0e+00|bna:106411018|K01228 mannosyl-oligosaccharide glucosidase [EC:3.2.1.106] | (RefSeq) mannosyl-oligosaccharide glucosidase GCS1	N-Glycan biosynthesis (ko00510);; Protein processing in endoplasmic reticulum (ko04141)
gene_Bol042105	81.6226	72.1559	31.0379	114.897	98.337	93.9385	0.023008	0.829955	up	K13426|1.2e-166|boe:106304328|K13426 WRKY transcription factor 29 | (RefSeq) probable WRKY transcription factor 29	MAPK signaling pathway - plant (ko04016);; Plant-pathogen interaction (ko04626)
gene_Bol026258	5.4395	4.11371	5.01996	9.07196	8.51714	8.25063	0.00141147	0.926806	up	K07766|9.1e-98|boe:106297090|K07766 diphosphoinositol-polyphosphate diphosphatase [EC:3.6.1.52] | (RefSeq) nudix hydrolase 21, chloroplastic-like	--
gene_Bol011094	3.0756	1.27476	4.83624	0.758509	1.89081	0.862204	0.0413698	-1.29543	down	K13416|2.0e-37|han:110928984|K13416 brassinosteroid insensitive 1-associated receptor kinase 1 [EC:2.7.10.1 2.7.11.1] | (RefSeq) BRASSINOSTEROID INSENSITIVE 1-associated receptor kinase 1-like isoform X1	MAPK signaling pathway - plant (ko04016);; Plant hormone signal transduction (ko04075);; Plant-pathogen interaction (ko04626)
gene_Bol035253	3.34771	2.95807	4.59819	1.8979	1.94765	2.00401	0.00982325	-0.786683	down	K13696|2.8e-190|pop:18098310|K13696 abhydrolase domain-containing protein 1/3 | (RefSeq) embryogenesis-associated protein EMB8	--
gene_Bol039115	7.15362	7.54324	10.2638	2.39742	6.07424	3.91019	0.0125495	-0.930711	down	--	--
gene_Bol031211	6.71935	5.40189	4.21546	9.23188	6.80825	9.77026	0.0126111	0.777857	up	K20887|0.0e+00|bna:106382149|K20887 xyloglucan glycosyltransferase 4 [EC:2.4.1.-] | (RefSeq) xyloglucan glycosyltransferase 4-like	--
gene_Bol044228	6.0186	5.12739	3.63855	8.31701	8.95099	8.19734	0.00344592	0.879842	up	K15414|2.7e-138|bna:111205301|K15414 complement component 1 Q subcomponent-binding protein, mitochondrial | (RefSeq) uncharacterized protein At2g39795, mitochondrial-like isoform X1	--
gene_Bol036583	5.30596	4.47522	3.37207	5.06257	9.43595	9.31055	0.00993335	0.95263	up	--	--
gene_Bol039113	10.4189	12.3935	43.449	7.04991	11.4086	4.55718	0.00832457	-1.45022	down	--	--
Brassica_oleracea_newGene_2177	0.956249	1.62667	1.45435	2.57516	2.34285	2.11267	0.0192796	0.882285	up	K13457|1.1e-36|dzi:111286050|K13457 disease resistance protein RPM1 | (RefSeq) disease resistance protein RPM1-like isoform X1	Plant-pathogen interaction (ko04626)
gene_Bol011498	55.4886	67.6179	47.216	89.039	63.2301	88.8912	0.0288925	0.616669	up	K05765|1.9e-71|bna:106363888|K05765 cofilin | (RefSeq) actin-depolymerizing factor 8	--
gene_Bol018628	4.60675	3.87098	7.15723	2.94406	3.20503	2.79146	0.024019	-0.703027	down	K00763|1.6e-310|bna:106411400|K00763 nicotinate phosphoribosyltransferase [EC:6.3.4.21] | (RefSeq) nicotinate phosphoribosyltransferase 1	Nicotinate and nicotinamide metabolism (ko00760)
Brassica_oleracea_newGene_7830	4.59033	5.10059	1.996	7.76549	10.5018	11.4067	0.000451365	1.43893	up	K00993|1.2e-18|bna:106453259|K00993 ethanolaminephosphotransferase [EC:2.7.8.1] | (RefSeq) uncharacterized protein LOC106453259	Phosphonate and phosphinate metabolism (ko00440);; Glycerophospholipid metabolism (ko00564);; Ether lipid metabolism (ko00565)
gene_Bol032054	0.707134	0.656659	0.91329	1.51214	2.78086	1.06497	0.00298684	1.28459	up	K16226|0.0e+00|bna:106416466|K16226 disease resistance protein RPS4 | (RefSeq) disease resistance protein RPS4-like	Plant-pathogen interaction (ko04626)
gene_Bol011530	4.64398	5.69828	8.34026	3.60235	1.90055	3.5745	0.0472264	-0.906747	down	K21994|1.9e-47|bvg:104905420|K21994 LOB domain-containing protein 18 | (RefSeq) LOB domain-containing protein 19	--
gene_Bol033469	16.0831	9.77136	10.4433	23.6126	28.4289	13.8971	0.00410994	0.936319	up	--	--
gene_Bol031508	27.4236	21.6593	12.3052	39.3065	42.2435	32.1216	0.00239706	0.976485	up	K14491|8.4e-09|cic:CICLE_v10007648mg|K14491 two-component response regulator ARR-B family | (RefSeq) hypothetical protein	Plant hormone signal transduction (ko04075)
gene_Bol015885	21.9489	25.2217	18.7217	42.4785	20.7427	44.9459	0.0224992	0.847427	up	K10260|1.5e-13|ota:OT_ostta09g00430|K10260 F-box and WD-40 domain protein 7 | (RefSeq) WD40/YVTN repeat-like-containing domain	Ubiquitin mediated proteolysis (ko04120)
gene_Bol040176	11.9498	6.33991	3.77341	12.0737	10.2605	16.4524	0.0432991	0.939266	up	K16224|7.7e-40|brp:103829497|K16224 senescence-induced receptor-like serine/threonine-protein kinase | (RefSeq) senescence-induced receptor-like serine/threonine-protein kinase isoform X2	MAPK signaling pathway - plant (ko04016);; Plant-pathogen interaction (ko04626)
gene_Bol006324	1.91722	2.35331	1.45278	2.87928	14.1606	4.59637	0.00118916	1.93984	up	--	--
Brassica_oleracea_newGene_11606	2.28785	1.18058	1.61184	0.082474	0.208381	0	4.39e-07	-4.02939	down	--	--
Brassica_oleracea_newGene_4077	3.09542	31.0043	10.171	62.0101	141.902	40.4944	0.000359631	2.46923	up	--	--
gene_Bol042279	1006.54	1594.73	448.234	2329.98	965.594	2828.1	0.0311669	1.14027	up	K00469|3.5e-168|boe:106306052|K00469 inositol oxygenase [EC:1.13.99.1] | (RefSeq) inositol oxygenase 4	Ascorbate and aldarate metabolism (ko00053);; Inositol phosphate metabolism (ko00562)
gene_Bol025773	9.30561	7.2074	10.9397	3.0865	6.24747	3.8246	0.000954404	-0.979149	down	K00695|0.0e+00|bna:106386990|K00695 sucrose synthase [EC:2.4.1.13] | (RefSeq) sucrose synthase 1	Starch and sucrose metabolism (ko00500)
gene_Bol007057	79.9429	65.1545	79.2296	161.822	79.993	131.314	0.00826881	0.86123	up	K08341|2.5e-62|bna:106353216|K08341 GABA(A) receptor-associated protein | (RefSeq) autophagy-related protein 8e-like	Autophagy - other (ko04136)
gene_Bol033035	11.5517	14.5601	12.8473	22.7284	17.9297	16.5445	0.0139434	0.651428	up	--	--
gene_Bol010101	119.253	149.699	147.526	90.8493	85.4508	81.1694	0.00292219	-0.593661	down	--	--
gene_Bol043568	7.86896	11.736	12.14	31.5847	27.4076	17.618	4.65e-06	1.35609	up	K03978|5.3e-184|boe:106313525|K03978 GTP-binding protein | (RefSeq) GTP-binding protein At2g22870	--
gene_Bol043525	6.47665	6.81028	12.1733	4.68958	3.56012	3.90735	0.00384583	-0.952167	down	K22048|0.0e+00|boe:106318719|K22048 mechanosensitive ion channel protein 4/5/6/7/8/9/10 | (RefSeq) mechanosensitive ion channel protein 10-like	--
gene_Bol015884	2.19978	2.82044	2.08085	3.62866	3.33256	3.67206	0.0319345	0.677998	up	K01051|3.2e-77|smo:SELMODRAFT_114014|K01051 pectinesterase [EC:3.1.1.11] | (RefSeq) hypothetical protein	Pentose and glucuronate interconversions (ko00040)
gene_Bol025346	109.342	97.7969	54.8051	139.523	160.804	171.446	0.00162641	0.950973	up	--	--
Brassica_oleracea_newGene_9322	13.8115	18.5055	20.8269	26.593	90.5677	16.9666	0.0115611	1.35466	up	--	--
gene_Bol011069	2.70682	0	0	5.9465	8.76822	5.59265	0.0384463	2.97581	up	K19892|3.0e-11|cmo:103491954|K19892 glucan endo-1,3-beta-glucosidase 4 [EC:3.2.1.39] | (RefSeq) glucan endo-1,3-beta-glucosidase 4-like	Starch and sucrose metabolism (ko00500)
gene_Bol025566	12.9246	16.1796	20.0642	11.7722	9.75241	6.70298	0.0384818	-0.710424	down	K02920|2.6e-53|bna:106390234|K02920 large subunit ribosomal protein L36e | (RefSeq) 60S ribosomal protein L36-2-like	Ribosome (ko03010)
gene_Bol040813	1.32752	1.59845	2.22041	0.857627	0.996951	0.567126	0.00611195	-1.00052	down	K01214|0.0e+00|bna:106401297|K01214 isoamylase [EC:3.2.1.68] | (RefSeq) isoamylase 2, chloroplastic-like	Starch and sucrose metabolism (ko00500)
gene_Bol038520	8.86801	10.3069	4.43281	5.15145	3.93837	1.43806	0.0363919	-1.09349	down	K01011|1.0e-174|brp:103832400|K01011 thiosulfate/3-mercaptopyruvate sulfurtransferase [EC:2.8.1.1 2.8.1.2] | (RefSeq) thiosulfate/3-mercaptopyruvate sulfurtransferase 1, mitochondrial	Cysteine and methionine metabolism (ko00270);; Sulfur metabolism (ko00920);; Sulfur relay system (ko04122)
gene_Bol015783	3.13181	1.81417	7.44985	1.60722	1.86837	2.1342	0.0376852	-1.02018	down	K05665|0.0e+00|eus:EUTSA_v10019894mg|K05665 ATP-binding cassette, subfamily C (CFTR/MRP), member 1 [EC:7.6.2.3] | (RefSeq) hypothetical protein	ABC transporters (ko02010)
gene_Bol013782	140.309	64.9593	139.365	204.088	133.495	168.217	0.0486555	0.67666	up	K15283|5.4e-215|bna:106376872|K15283 solute carrier family 35, member E1 | (RefSeq) glucose-6-phosphate/phosphate translocator 2, chloroplastic	--
gene_Bol028355	4.25761	4.6714	5.90358	2.94808	3.25266	2.05792	0.0168494	-0.757218	down	K08081|3.6e-09|jre:108998464|K08081 tropinone reductase I [EC:1.1.1.206] | (RefSeq) tropinone reductase homolog At5g06060-like isoform X1	Tropane, piperidine and pyridine alkaloid biosynthesis (ko00960)
gene_Bol007053	1.8147	2.03879	0.849137	3.0276	3.44272	3.21453	0.0451196	1.12344	up	--	--
gene_Bol030321	0.460378	0.245146	0.378183	0.687593	0.960342	0.440689	0.0439943	1.00885	up	--	--
gene_Bol034394	6.75781	6.94881	4.51762	15.2676	12.302	12.4493	3.13e-05	1.23387	up	K03283|2.7e-48|cann:107854185|K03283 heat shock 70kDa protein 1/2/6/8 | (RefSeq) heat shock cognate 70 kDa protein 2-like	Spliceosome (ko03040);; Protein processing in endoplasmic reticulum (ko04141);; Endocytosis (ko04144)
gene_Bol008858	568.191	417.669	462.135	166.795	69.4821	103.313	2.52e-08	-1.96895	down	K07304|4.5e-103|bna:106405877|K07304 peptide-methionine (S)-S-oxide reductase [EC:1.8.4.11] | (RefSeq) peptide methionine sulfoxide reductase A3-like	--
gene_Bol014947	7.59693	8.88987	6.57724	20.7182	9.71626	11.6152	0.00672862	0.975378	up	K24104|1.4e-88|thj:104799061|K24104 GPN-loop GTPase | (RefSeq) LOW QUALITY PROTEIN: uncharacterized protein LOC104799061	--
gene_Bol032668	8.66679	6.32264	11.3074	4.24064	6.71424	3.3833	0.0177674	-0.797102	down	K01488|6.8e-201|bna:106416186|K01488 adenosine deaminase [EC:3.5.4.4] | (RefSeq) adenosine deaminase-like protein	Purine metabolism (ko00230)
gene_Bol024052	39.5981	61.6168	57.2428	8.50529	49.8783	10.8089	0.0385406	-1.17898	down	--	--
gene_Bol009697	60.3183	69.7124	74.3587	37.2492	60.0832	31.1979	0.0144216	-0.59725	down	K14496|1.8e-104|bna:106397215|K14496 abscisic acid receptor PYR/PYL family | (RefSeq) abscisic acid receptor PYL9-like	MAPK signaling pathway - plant (ko04016);; Plant hormone signal transduction (ko04075)
gene_Bol041154	2.76572	2.95252	2.74506	0.854934	0.29111	0.183839	3.31e-05	-2.51024	down	K23544|1.5e-36|nsy:104225240|K23544 serine incorporator 1/3 | (RefSeq) probable serine incorporator	--
gene_Bol040867	24.5641	28.9673	16.7306	30.7655	30.7544	37.7522	0.0416282	0.605102	up	K14484|1.9e-134|bna:106402229|K14484 auxin-responsive protein IAA | (RefSeq) auxin-responsive protein IAA10	Plant hormone signal transduction (ko04075)
Brassica_oleracea_newGene_10137	1.61684	1.39568	0.519514	2.3726	2.35357	3.60847	0.0344839	1.3679	up	K17679|6.8e-72|boe:106323151|K17679 ATP-dependent RNA helicase MSS116, mitochondrial [EC:3.6.4.13] | (RefSeq) DEAD-box ATP-dependent RNA helicase 25-like	--
gene_Bol032903	4.79058	4.67888	7.41416	1.54015	1.12297	3.04312	0.00493524	-1.41185	down	--	--
gene_Bol028868	3.10321	1.5565	2.42409	6.75715	4.32193	9.37244	0.00172416	1.66561	up	--	--
gene_Bol039786	15.3095	13.1256	24.5427	10.7079	9.92722	5.10703	0.00527747	-0.954604	down	K00232|0.0e+00|boe:106328342|K00232 acyl-CoA oxidase [EC:1.3.3.6] | (RefSeq) putative peroxisomal acyl-coenzyme A oxidase 1.2	Fatty acid degradation (ko00071);; beta-Alanine metabolism (ko00410);; alpha-Linolenic acid metabolism (ko00592);; Propanoate metabolism (ko00640);; Biosynthesis of unsaturated fatty acids (ko01040);; Carbon metabolism (ko01200);; Fatty acid metabolism (ko01212);; Peroxisome (ko04146)
gene_Bol030497	54.9766	51.9458	83.0737	38.8402	31.2453	39.6536	0.0130071	-0.672913	down	K01611|2.2e-210|boe:106319277|K01611 S-adenosylmethionine decarboxylase [EC:4.1.1.50] | (RefSeq) S-adenosylmethionine decarboxylase proenzyme 2	Cysteine and methionine metabolism (ko00270);; Arginine and proline metabolism (ko00330)
gene_Bol045748	9.93172	5.99921	6.73173	27.9602	25.9933	17.5694	2.04e-10	1.7492	up	--	--
gene_Bol013510	2.99848	2.23738	1.35215	9.25509	4.52304	2.4481	0.0139105	1.38532	up	K03841|1.3e-171|bna:111213425|K03841 fructose-1,6-bisphosphatase I [EC:3.1.3.11] | (RefSeq) fructose-1,6-bisphosphatase, cytosolic-like	Glycolysis / Gluconeogenesis (ko00010);; Pentose phosphate pathway (ko00030);; Fructose and mannose metabolism (ko00051);; Carbon fixation in photosynthetic organisms (ko00710);; Carbon metabolism (ko01200)
gene_Bol040742	16.9609	11.5874	18.4496	52.6833	40.5715	61.9776	5.02e-10	1.85098	up	K19355|2.3e-240|bna:106400094|K19355 mannan endo-1,4-beta-mannosidase [EC:3.2.1.78] | (RefSeq) mannan endo-1,4-beta-mannosidase 1-like	Fructose and mannose metabolism (ko00051)
gene_Bol027909	39.933	32.9936	92.6473	22.2435	21.4009	29.4673	0.0164343	-1.05126	down	--	--
gene_Bol043000	16.1107	15.6978	20.156	32.9584	19.7344	34.9019	0.00854851	0.882577	up	K02183|1.4e-96|boe:106301202|K02183 calmodulin | (RefSeq) probable calcium-binding protein CML30	MAPK signaling pathway - plant (ko04016);; Phosphatidylinositol signaling system (ko04070);; Plant-pathogen interaction (ko04626)
gene_Bol025759	58.1015	64.8378	44.9676	105.039	75.6845	112.231	0.00128718	0.920436	up	K00521|2.4e-42|cmos:111447866|K00521 ferric-chelate reductase [EC:1.16.1.7] | (RefSeq) ferric reduction oxidase 7, chloroplastic-like	--
gene_Bol014107	160.877	180.178	116.407	331.292	252.901	285.645	8.03e-05	1.03244	up	--	--
gene_Bol011452	9.89692	9.06134	12.3709	4.50931	6.00426	7.938	0.0303629	-0.64426	down	K01537|0.0e+00|brp:103836850|K01537 P-type Ca2+ transporter type 2C [EC:7.2.2.10] | (RefSeq) calcium-transporting ATPase 2, endoplasmic reticulum-type	--
gene_Bol017876	2.37392	22.1787	13.6915	17.0256	69.9068	20.4031	0.0448025	1.50426	up	--	--
gene_Bol038095	7.64771	9.08836	4.56341	10.2017	16.6051	17.6666	0.00510779	1.15589	up	--	--
gene_Bol040695	5.60313	6.4112	3.9751	6.19361	9.00539	10.4658	0.0177069	0.786943	up	--	--
gene_Bol026248	2.96958	2.12764	2.60412	0.587588	1.28631	0.582442	0.00305597	-1.56048	down	K07976|1.4e-125|bna:106406075|K07976 Rab family, other | (RefSeq) ras-related protein RABA6a	--
gene_Bol029597	123.069	152.076	114.974	188.104	184.498	210.803	0.00205645	0.686096	up	K24345|8.7e-60|brp:103858225|K24345 calcium-binding protein KIC and related proteins | (RefSeq) calcium-binding protein KIC	--
Brassica_oleracea_newGene_2673	21.734	26.7503	18.1868	15.7244	10.1334	11.2345	0.00782017	-0.746357	down	K13418|1.0e-71|sbi:8073419|K13418 somatic embryogenesis receptor kinase 1 [EC:2.7.10.1 2.7.11.1] | (RefSeq) LRR receptor kinase BAK1	--
gene_Bol042086	13.6117	12.7404	8.05357	14.5227	20.6693	19.9459	0.00679048	0.776947	up	K24104|3.5e-102|thj:104799061|K24104 GPN-loop GTPase | (RefSeq) LOW QUALITY PROTEIN: uncharacterized protein LOC104799061	--
Brassica_oleracea_newGene_8209	1.13139	2.17781	0.454204	3.09567	3.40428	3.25996	0.0237357	1.43936	up	--	--
gene_Bol030419	17.8313	19.4443	23.6088	9.66164	17.9465	10.3193	0.0195549	-0.606174	down	K14638|1.2e-175|cpap:110820281|K14638 solute carrier family 15 (peptide/histidine transporter), member 3/4 | (RefSeq) protein NRT1/ PTR FAMILY 5.9	--
Brassica_oleracea_newGene_1569	2.19597	1.87797	2.25961	0.780579	1.42502	0.765642	0.0116988	-1.00533	down	--	--
gene_Bol009977	9.81852	5.47606	19.0154	4.17419	5.3595	2.75009	0.00224893	-1.39369	down	K17285|2.3e-295|boe:106342254|K17285 methanethiol oxidase [EC:1.8.3.4] | (RefSeq) selenium-binding protein 2-like	Sulfur metabolism (ko00920)
gene_Bol027340	0.857598	0.683534	2.04118	0.283848	0.191352	0.508832	0.019074	-1.66621	down	--	--
gene_Bol043954	2.57588	1.78248	2.2218	3.91809	3.82586	4.23133	0.00619271	0.966197	up	K14842|2.8e-143|bna:106371258|K14842 ribosome biogenesis protein NSA2 | (RefSeq) ribosome biogenesis protein NSA2 homolog	--
gene_Bol004697	1.66064	1.15572	0.727459	2.7544	2.00902	3.11246	0.00226299	1.2709	up	K14489|0.0e+00|bna:106431570|K14489 arabidopsis histidine kinase 2/3/4 (cytokinin receptor) [EC:2.7.13.3] | (RefSeq) histidine kinase 4 isoform X3	Plant hormone signal transduction (ko04075)
gene_Bol023890	4.34655	3.24949	1.74594	5.50921	4.28331	9.30184	0.0194309	1.16255	up	K18834|3.5e-17|cmo:103500526|K18834 WRKY transcription factor 1 | (RefSeq) WRKY transcription factor 1	Plant-pathogen interaction (ko04626)
gene_Bol018150	2.90182	5.40383	13.0299	0.208032	0.113062	0.322825	2.49e-09	-4.7437	down	--	--
gene_Bol044171	1.06359	1.16753	1.83912	0.571206	0.842372	0.397253	0.0202432	-1.08778	down	K22422|0.0e+00|boe:106342774|K22422 protein downstream neighbor of Son | (RefSeq) protein downstream neighbor of Son-like isoform X1	--
gene_Bol014090	0.682545	1.11942	0.968173	2.42516	2.76908	5.24504	0.00057091	2.01879	up	--	--
gene_Bol007750	49.5169	43.4904	33.8802	83.304	45.1564	69.9815	0.015329	0.766421	up	--	--
gene_Bol045437	49.4411	57.2194	42.4065	67.6678	52.5458	87.1671	0.0484994	0.599603	up	--	--
Brassica_oleracea_newGene_3946	0.092654	0.221127	0.359438	0.958854	0.67893	0.937782	0.00519725	1.9822	up	--	--
gene_Bol033727	13.0777	14.1766	10.3781	19.6443	15.4807	18.0277	0.0157613	0.605562	up	K19041|3.8e-21|aip:107622572|K19041 E3 ubiquitin-protein ligase RNF38/44 [EC:2.3.2.27] | (RefSeq) E3 ubiquitin-protein ligase MBR2 isoform X1	--
gene_Bol024595	1.20109	1.05197	0.66612	3.21541	3.18103	6.06399	2.54e-06	2.21335	up	K11968|2.9e-287|bna:111202510|K11968 ariadne-1 [EC:2.3.2.31] | (RefSeq) probable E3 ubiquitin-protein ligase ARI16	--
gene_Bol016781	12.4378	13.8317	15.0425	9.18532	9.04048	7.14943	0.00089552	-0.60755	down	K13126|0.0e+00|bna:106405950|K13126 polyadenylate-binding protein | (RefSeq) polyadenylate-binding protein 8	RNA transport (ko03013);; mRNA surveillance pathway (ko03015);; RNA degradation (ko03018)
gene_Bol038837	4.59971	7.32864	10.7912	2.20733	1.07875	3.4988	0.00360715	-1.58893	down	K13066|1.8e-209|boe:106318901|K13066 caffeic acid 3-O-methyltransferase [EC:2.1.1.68] | (RefSeq) flavone 3'-O-methyltransferase 1-like	Phenylpropanoid biosynthesis (ko00940)
gene_Bol042083	28.5259	24.9443	16.1399	31.0434	39.9406	30.8415	0.0137019	0.636107	up	K24104|7.7e-102|thj:104799061|K24104 GPN-loop GTPase | (RefSeq) LOW QUALITY PROTEIN: uncharacterized protein LOC104799061	--
Brassica_oleracea_newGene_11619	1.66072	1.80611	2.87249	0.086273	0	0	1.65e-08	-5.95801	down	--	--
gene_Bol020423	4.73196	4.60323	6.17337	2.29686	2.15014	1.39614	0.005322	-1.28142	down	K02918|4.2e-57|bna:106420673|K02918 large subunit ribosomal protein L35e | (RefSeq) 60S ribosomal protein L35-2-like	Ribosome (ko03010)
gene_Bol026223	0.105411	0.124026	0.342557	0.472953	1.51494	0.414783	0.00365444	2.09168	up	K10406|0.0e+00|bna:106409616|K10406 kinesin family member C2/C3 | (RefSeq) kinesin-like protein KIN-14P	--
Brassica_oleracea_newGene_8942	5.65356	10.3465	10.3191	3.5235	4.79948	1.74274	0.000519043	-1.31416	down	K03006|8.4e-268|adu:107466525|K03006 DNA-directed RNA polymerase II subunit RPB1 [EC:2.7.7.6] | (RefSeq) LOW QUALITY PROTEIN: DNA-directed RNA polymerase II subunit 1-like	RNA polymerase (ko03020)
gene_Bol038200	46.2078	71.1227	82.6632	12.6543	57.1818	29.1148	0.0397604	-0.956289	down	K23544|3.1e-103|brp:103842861|K23544 serine incorporator 1/3 | (RefSeq) serine incorporator 3	--
gene_Bol033038	3.50781	5.15828	3.82971	4.61003	10.8905	6.31014	0.0349289	0.868273	up	--	--
gene_Bol008821	6.16859	4.30208	5.52519	2.83486	3.8997	1.77269	0.0155397	-0.829942	down	K01749|3.2e-204|bna:106384978|K01749 hydroxymethylbilane synthase [EC:2.5.1.61] | (RefSeq) porphobilinogen deaminase, chloroplastic-like	Porphyrin and chlorophyll metabolism (ko00860)
gene_Bol020058	3.54493	3.41628	5.55832	1.67145	1.83479	2.09849	0.003291	-1.04196	down	K14491|1.6e-10|bvg:104883152|K14491 two-component response regulator ARR-B family | (RefSeq) two-component response regulator ORR24	Plant hormone signal transduction (ko04075)
gene_Bol008153	10.699	7.96797	11.7158	5.40497	7.78263	4.11097	0.017182	-0.733549	down	--	--
gene_Bol017380	18.6418	14.7692	27.7414	10.4503	12.8758	7.79362	0.0038345	-0.88352	down	K08869|8.7e-22|cre:CHLREDRAFT_165812|K08869 aarF domain-containing kinase | (RefSeq) predicted protein	--
gene_Bol023926	392.127	409.373	900.585	322.082	167.414	334.062	0.0314986	-0.906856	down	--	--
gene_Bol038617	0.982794	1.15507	0.531183	7.87245	2.81519	1.62037	0.00121458	2.27797	up	K14484|4.9e-126|bna:106367506|K14484 auxin-responsive protein IAA | (RefSeq) auxin-responsive protein IAA7-like	Plant hormone signal transduction (ko04075)
gene_Bol024080	18.6743	17.0028	20.6724	11.6252	11.1062	11.5312	0.000564365	-0.610473	down	K20292|0.0e+00|bna:106406170|K20292 conserved oligomeric Golgi complex subunit 5 | (RefSeq) conserved oligomeric Golgi complex subunit 5-like	--
Brassica_oleracea_newGene_7018	9.11651	8.9214	5.50299	9.63474	13.8476	10.6652	0.0232201	0.621831	up	K24104|1.2e-83|thj:104799061|K24104 GPN-loop GTPase | (RefSeq) LOW QUALITY PROTEIN: uncharacterized protein LOC104799061	--
gene_Bol030382	114.231	135.327	97.7012	171.879	136.028	200.314	0.0139735	0.667036	up	K18834|3.0e-22|soe:110803840|K18834 WRKY transcription factor 1 | (RefSeq) WRKY transcription factor 1	Plant-pathogen interaction (ko04626)
gene_Bol029448	3.41148	2.44065	3.49612	1.08375	1.69843	2.06177	0.0450229	-0.82435	down	K00924|1.7e-101|csat:104712177|K00924 kinase [EC:2.7.1.-] | (RefSeq) probable receptor-like protein kinase At3g55450 isoform X1	--
gene_Bol012586	17.5474	14.5571	23.1081	5.03279	8.01821	8.60408	0.00118264	-1.23565	down	--	--
gene_Bol012490	7.11962	6.0691	9.07161	1.34006	4.29561	3.22875	0.0100507	-1.24016	down	K07943|5.5e-101|boe:106328868|K07943 ADP-ribosylation factor-like protein 2 | (RefSeq) ADP-ribosylation factor-like protein 2 isoform X1	--
gene_Bol017630	23.517	13.7179	6.7412	30.186	23.4039	29.9525	0.0356518	1.0372	up	K13126|1.0e-10|bna:111200716|K13126 polyadenylate-binding protein | (RefSeq) polyadenylate-binding protein, cytoplasmic and nuclear-like	RNA transport (ko03013);; mRNA surveillance pathway (ko03015);; RNA degradation (ko03018)
gene_Bol031310	2.24718	1.811	5.65107	0.708913	1.11894	1.99176	0.0461966	-1.19803	down	K01051|0.0e+00|bna:106416267|K01051 pectinesterase [EC:3.1.1.11] | (RefSeq) LOW QUALITY PROTEIN: pectinesterase/pectinesterase inhibitor 18	Pentose and glucuronate interconversions (ko00040)
gene_Bol034675	5.95256	7.02985	10.627	4.28279	5.37906	3.34635	0.0146912	-0.770083	down	K00801|1.7e-208|bna:106371265|K00801 farnesyl-diphosphate farnesyltransferase [EC:2.5.1.21] | (RefSeq) squalene synthase 1 isoform X1	Steroid biosynthesis (ko00100);; Sesquiterpenoid and triterpenoid biosynthesis (ko00909)
gene_Bol005917	38.829	46.2569	29.6494	65.8395	38.0864	74.052	0.0422133	0.761371	up	--	--
gene_Bol045807	0.581484	1.23816	0.415397	1.30837	1.99719	1.62682	0.0283089	1.21218	up	K13692|4.6e-266|boe:106310931|K13692 UDP-glucose:(indol-3-yl)acetate beta-D-glucosyltransferase [EC:2.4.1.121] | (RefSeq) UDP-glycosyltransferase 84B2-like	--
gene_Bol013615	3.54218	3.49292	2.35126	7.58284	7.26076	5.07287	0.000204158	1.1629	up	K12126|4.3e-14|nau:109236817|K12126 phytochrome-interacting factor 3 | (RefSeq) transcription factor PIF3-like isoform X1	Plant hormone signal transduction (ko04075);; Circadian rhythm - plant (ko04712)
gene_Bol008566	37.9333	47.9061	35.5046	59.5026	65.8516	73.8857	0.000784005	0.817992	up	--	--
Brassica_oleracea_newGene_4799	1.48851	1.79014	0.692371	4.46622	4.55063	1.633	0.0181942	1.44694	up	K19562|1.6e-23|bna:106404343|K19562 bifunctional dethiobiotin synthetase / adenosylmethionine---8-amino-7-oxononanoate aminotransferase [EC:6.3.3.3 2.6.1.62] | (RefSeq) bifunctional dethiobiotin synthetase/7,8-diamino-pelargonic acid aminotransferase, mitochondrial-like	Biotin metabolism (ko00780)
Brassica_oleracea_newGene_10010	1.26133	0.940434	0.683553	2.39305	2.7479	0.912176	0.0158015	1.10689	up	K10398|8.2e-38|eus:EUTSA_v10016147mg|K10398 kinesin family member 11 | (RefSeq) hypothetical protein	--
gene_Bol012966	10.0021	16.2876	10.2263	7.1397	8.01574	5.39235	0.0281002	-0.745625	down	K16569|5.5e-55|sita:101783840|K16569 gamma-tubulin complex component 2 | (RefSeq) gamma-tubulin complex component 2	--
gene_Bol005121	31.2236	17.4767	34.0749	39.0597	33.052	47.6793	0.0427899	0.660089	up	K16225|7.2e-19|csat:104760397|K16225 probable WRKY transcription factor 52 | (RefSeq) disease resistance protein RRS1-like	Plant-pathogen interaction (ko04626)
Brassica_oleracea_newGene_2604	1.24221	1.43571	0.658172	2.66657	1.76677	2.93012	0.0111089	1.24049	up	K22503|1.5e-72|lsv:111885850|K22503 aspartyl-tRNA synthetase [EC:6.1.1.12] | (RefSeq) aspartate--tRNA ligase 2, cytoplasmic-like	Aminoacyl-tRNA biosynthesis (ko00970)
gene_Bol028942	207.145	192.982	197.081	355.126	190.141	307.342	0.0323025	0.638473	up	K13448|8.4e-80|bna:106438539|K13448 calcium-binding protein CML | (RefSeq) calcium-binding protein CML19	Plant-pathogen interaction (ko04626)
gene_Bol029107	1.75895	1.95756	3.66496	0.409599	0.725941	0.478426	1.83e-05	-2.08177	down	--	--
gene_Bol012334	15.7061	32.2531	41.9172	11.1639	20.4231	8.64898	0.00726764	-1.0971	down	K15378|5.2e-295|bna:106410477|K15378 solute carrier family 45, member 1/2/4 | (RefSeq) sucrose transport protein SUC2	--
gene_Bol016272	2.07703	0.428963	0.333275	0.393322	12.8789	2.05065	0.0188838	2.41112	up	K01188|1.6e-304|boe:106316338|K01188 beta-glucosidase [EC:3.2.1.21] | (RefSeq) beta-glucosidase 15-like	Cyanoamino acid metabolism (ko00460);; Starch and sucrose metabolism (ko00500);; Phenylpropanoid biosynthesis (ko00940)
gene_Bol024475	51.6669	49.3981	59.5422	41.3566	24.2206	31.2079	0.025591	-0.612833	down	K00430|4.1e-97|bna:106379250|K00430 peroxidase [EC:1.11.1.7] | (RefSeq) peroxidase P7-like	Phenylpropanoid biosynthesis (ko00940)
gene_Bol010345	104.826	118.472	156.404	63.6402	54.4513	64.8584	0.000112853	-0.939552	down	--	--
gene_Bol026318	25.9805	26.4223	45.4689	13.3395	23.3934	14.8193	0.00537264	-0.840682	down	K14497|4.4e-275|boe:106300535|K14497 protein phosphatase 2C [EC:3.1.3.16] | (RefSeq) protein phosphatase 2C 16	MAPK signaling pathway - plant (ko04016);; Plant hormone signal transduction (ko04075)
Brassica_oleracea_newGene_592	15.625	17.5399	17.1983	25.8705	33.4765	29.2646	1.84e-06	0.908083	up	--	--
Brassica_oleracea_newGene_6121	10.5949	4.98764	10.4956	3.15022	1.81375	2.72042	2.85e-05	-1.62553	down	K22824|8.0e-62|boe:106297664|K22824 pre-mRNA-splicing regulator WTAP | (RefSeq) uncharacterized protein LOC106297664	--
Brassica_oleracea_newGene_5241	117.061	113.37	74.2444	203.144	98.5144	158.399	0.0403857	0.715398	up	K00695|1.5e-61|mtr:MTR_6g478030|K00695 sucrose synthase [EC:2.4.1.13] | (RefSeq) sucrose synthase	Starch and sucrose metabolism (ko00500)
gene_Bol033140	47.4172	33.3464	39.6978	69.4227	74.0983	41.6192	0.00446174	0.703039	up	K18328|6.9e-36|nsy:104234532|K18328 lariat debranching enzyme [EC:3.1.-.-] | (RefSeq) lariat debranching enzyme isoform X1	--
gene_Bol045540	2.97458	3.65385	3.80942	2.4279	1.61314	1.45149	0.0271368	-0.826527	down	K10268|2.7e-157|bna:106368148|K10268 F-box and leucine-rich repeat protein 2/20 | (RefSeq) F-box protein At3g58530	--
gene_Bol005050	57.9411	48.1354	27.8833	58.9692	60.6648	81.4615	0.0379461	0.699695	up	K11592|2.4e-39|lsv:111902034|K11592 endoribonuclease Dicer [EC:3.1.26.-] | (RefSeq) endoribonuclease Dicer homolog 1	--
gene_Bol007255	19.5954	22.7783	34.1045	11.7696	20.4648	8.99697	0.0153581	-0.821941	down	K03386|3.0e-140|bna:106450458|K03386 peroxiredoxin 2/4 [EC:1.11.1.24] | (RefSeq) 2-Cys peroxiredoxin BAS1, chloroplastic	--
gene_Bol018837	3.61119	3.70469	3.57649	4.71455	5.12007	6.76761	0.0404328	0.722689	up	--	--
gene_Bol041267	16.7444	16.9875	24.791	8.8018	14.143	9.46033	0.00292516	-0.766493	down	K02836|8.0e-247|bna:106383079|K02836 peptide chain release factor 2 | (RefSeq) peptide chain release factor PrfB1, chloroplastic isoform X1	--
gene_Bol030357	37.0367	41.3027	38.4685	54.3915	94.651	60.6229	2.31e-05	0.921372	up	--	--
gene_Bol026553	0.710045	1.13752	0.956994	0.490896	0.105789	0.282885	0.0258207	-1.52297	down	--	--
gene_Bol009954	9.22561	15.4777	16.8862	5.01045	9.41553	6.28823	0.0234713	-0.918693	down	K21797|4.7e-17|bna:106349061|K21797 phosphatidylinositol 4-phosphatase [EC:3.1.3.-] | (RefSeq) phosphoinositide phosphatase SAC8-like isoform X1	Inositol phosphate metabolism (ko00562);; Phosphatidylinositol signaling system (ko04070)
gene_Bol010135	0.912863	1.66737	0.939348	0.33383	0.752552	0.174104	0.0155222	-1.42035	down	K13459|0.0e+00|bna:106406636|K13459 disease resistance protein RPS2 | (RefSeq) probable disease resistance protein At1g15890	Plant-pathogen interaction (ko04626)
gene_Bol007952	14.7084	19.6533	12.2974	22.6765	22.8293	20.1956	0.0167178	0.586333	up	K19564|7.7e-60|qsu:111984493|K19564 choline transport protein | (RefSeq) choline transport protein-like	--
Brassica_oleracea_newGene_8210	0.322333	0.247408	0.153999	1.03739	0.623322	0.623341	0.00684754	1.73546	up	K17604|5.8e-22|oeu:111409841|K17604 zinc finger SWIM domain-containing protein 3 | (RefSeq) uncharacterized protein LOC111409841	--
gene_Bol014956	11.236	18.9321	7.29767	18.9844	29.6858	36.2269	0.00206835	1.28106	up	K24104|5.5e-94|thj:104799061|K24104 GPN-loop GTPase | (RefSeq) LOW QUALITY PROTEIN: uncharacterized protein LOC104799061	--
gene_Bol023794	0.523942	0.260146	1.56121	4.12436	1.61273	1.39681	0.0399273	1.6843	up	--	--
gene_Bol042066	5.97114	2.73467	2.54215	6.91116	2.62254	37.0519	0.0141078	2.2391	up	K09264|1.6e-08|cann:107879769|K09264 MADS-box transcription factor, plant | (RefSeq) agamous-like MADS-box protein AGL11	--
gene_Bol036026	17.106	17.7578	19.3399	23.7255	17.0423	59.4992	0.0298941	1.04737	up	K05359|8.2e-241|bna:106436926|K05359 arogenate/prephenate dehydratase [EC:4.2.1.91 4.2.1.51] | (RefSeq) arogenate dehydratase 5, chloroplastic-like	Phenylalanine, tyrosine and tryptophan biosynthesis (ko00400);; Biosynthesis of amino acids (ko01230)
gene_Bol018410	52.9626	49.8818	51.053	72.813	66.8541	101.986	0.00309045	0.774083	up	K16275|7.3e-188|boe:106309537|K16275 E3 ubiquitin-protein ligase BAH [EC:2.3.2.27] | (RefSeq) E3 ubiquitin-protein ligase BAH1-like	--
gene_Bol038252	10.894	9.71226	7.42909	16.6922	11.5661	13.7711	0.0128475	0.693511	up	K17609|2.5e-104|cic:CICLE_v10010213mg|K17609 nucleoredoxin [EC:1.8.1.8] | (RefSeq) hypothetical protein	--
gene_Bol015272	2.65566	1.72741	1.98161	1.27729	0.713612	1.00683	0.0199768	-0.957548	down	K10403|0.0e+00|boe:106328584|K10403 kinesin family member 22 | (RefSeq) kinesin-like protein KIF22	--
gene_Bol013511	0.698549	0.539052	0.378908	0.707704	1.64341	1.12493	0.0110602	1.17014	up	K20924|0.0e+00|boe:106342336|K20924 cellulose synthase-like protein [EC:2.4.1.-] | (RefSeq) cellulose synthase-like protein D1	--
gene_Bol041048	2.46818	3.09879	1.97641	10.5861	1.58446	6.1277	0.0277757	1.41296	up	K16818|3.2e-45|dzi:111313258|K16818 phospholipase A1 [EC:3.1.1.32] | (RefSeq) phospholipase A(1) DAD1, chloroplastic-like	Glycerophospholipid metabolism (ko00564);; alpha-Linolenic acid metabolism (ko00592)
gene_Bol010795	12.8439	15.8509	17.0119	8.22871	7.6538	6.41919	0.00158653	-0.934426	down	K02942|2.4e-35|bna:106388768|K02942 large subunit ribosomal protein LP1 | (RefSeq) 60S acidic ribosomal protein P1-2	Ribosome (ko03010)
gene_Bol013343	4.12924	2.43396	4.29771	0.990032	1.15292	0.939453	8.79e-07	-1.70183	down	K13447|0.0e+00|boe:106296490|K13447 respiratory burst oxidase [EC:1.6.3.- 1.11.1.-] | (RefSeq) respiratory burst oxidase homolog protein C-like isoform X1	MAPK signaling pathway - plant (ko04016);; Plant-pathogen interaction (ko04626)
gene_Bol038972	875.231	753.073	774.998	844.781	1561.37	1352.38	0.00304734	0.739206	up	K01859|4.3e-11|rcu:8264259|K01859 chalcone isomerase [EC:5.5.1.6] | (RefSeq) chalcone--flavonone isomerase	Flavonoid biosynthesis (ko00941)
gene_Bol025528	40.16	79.7889	137.564	29.5781	38.5057	28.3335	0.00108094	-1.32465	down	K09872|1.9e-161|bna:106396434|K09872 aquaporin PIP | (RefSeq) aquaporin PIP2-2	--
Brassica_oleracea_newGene_6587	1.64811	1.16402	1.20002	0.556221	0.674662	0.378738	0.0132748	-1.22425	down	--	--
Brassica_oleracea_newGene_4292	4.80657	3.24901	0.598597	10.9056	8.42774	25.384	0.00027917	2.50917	up	K22546|1.6e-112|ath:AT3G44860|K22546 juvenile hormone-III synthase [EC:2.1.1.325] | (RefSeq) FAMT; farnesoic acid carboxyl-O-methyltransferase	--
gene_Bol019357	12.832	10.6558	9.161	15.4423	15.8487	14.8711	0.0136634	0.602767	up	K19041|9.5e-64|cam:101507426|K19041 E3 ubiquitin-protein ligase RNF38/44 [EC:2.3.2.27] | (RefSeq) E3 ubiquitin-protein ligase MBR2	--
gene_Bol017693	0.929142	3.08378	1.20462	6.88731	6.95685	1.44585	0.031607	1.58674	up	K15014|2.0e-73|brp:103839767|K15014 solute carrier family 29 (equilibrative nucleoside transporter), member 1/2/3 | (RefSeq) equilibrative nucleotide transporter 3	--
gene_Bol033770	3.62807	4.60959	4.77092	1.73781	3.394	0.715796	0.0402776	-1.10697	down	K04498|1.7e-07|bpg:Bathy08g02820|K04498 E1A/CREB-binding protein [EC:2.3.1.48] | (RefSeq) histone acetyltransferase	--
gene_Bol010879	7.73226	6.48325	10.3783	4.33984	5.4238	3.61583	0.010619	-0.783996	down	K11600|1.1e-128|bna:106402471|K11600 exosome complex component RRP41 | (RefSeq) exosome complex component RRP41 homolog	RNA degradation (ko03018)
gene_Bol015120	4.70668	5.94211	7.01082	2.19363	4.62375	2.99496	0.0437485	-0.756868	down	K14491|1.9e-06|eus:EUTSA_v10012052mg|K14491 two-component response regulator ARR-B family | (RefSeq) hypothetical protein	Plant hormone signal transduction (ko04075)
gene_Bol032955	109.992	97.9082	117.951	212.866	228.7	96.178	0.00699856	0.79481	up	--	--
gene_Bol017945	25.5807	27.0219	42.2763	17.5844	22.8641	15.5974	0.00644982	-0.670394	down	K00811|1.1e-260|boe:106310007|K00811 aspartate aminotransferase, chloroplastic [EC:2.6.1.1] | (RefSeq) aspartate aminotransferase, chloroplastic	Arginine biosynthesis (ko00220);; Alanine, aspartate and glutamate metabolism (ko00250);; Cysteine and methionine metabolism (ko00270);; Arginine and proline metabolism (ko00330);; Tyrosine metabolism (ko00350);; Phenylalanine metabolism (ko00360);; Phenylalanine, tyrosine and tryptophan biosynthesis (ko00400);; Isoquinoline alkaloid biosynthesis (ko00950);; Tropane, piperidine and pyridine alkal…
gene_Bol012767	35.0476	33.079	41.0595	26.9818	18.722	17.3437	0.00562475	-0.687539	down	K06269|1.3e-187|bna:111203405|K06269 serine/threonine-protein phosphatase PP1 catalytic subunit [EC:3.1.3.16] | (RefSeq) serine/threonine-protein phosphatase PP1 isozyme 9-like	mRNA surveillance pathway (ko03015)
gene_Bol036151	3.32042	2.55381	1.58669	5.61993	10.454	2.48592	0.0305311	1.34067	up	K11671|5.0e-10|bna:106347515|K11671 nuclear factor related to kappa-B-binding protein | (RefSeq) uncharacterized protein LOC106347515	--
gene_Bol017338	30.5025	30.4756	56.847	21.4508	29.8579	16.231	0.0265511	-0.720547	down	K19891|6.8e-18|vra:106769555|K19891 glucan endo-1,3-beta-glucosidase 1/2/3 [EC:3.2.1.39] | (RefSeq) glucan endo-1,3-beta-glucosidase 1	Starch and sucrose metabolism (ko00500)
gene_Bol021071	18.0421	11.4769	10.3577	25.1949	45.7993	28.4661	8.43e-05	1.39933	up	K07192|3.0e-40|bna:106382844|K07192 flotillin | (RefSeq) flotillin-like protein 3	--
gene_Bol037085	8.61606	7.48365	3.33363	25.9651	4.8961	12.2758	0.0299705	1.27886	up	K14500|1.3e-274|boe:106305289|K14500 BR-signaling kinase [EC:2.7.11.1] | (RefSeq) probable serine/threonine-protein kinase At4g35230	Plant hormone signal transduction (ko04075)
gene_Bol031505	7.34891	7.44322	4.08234	12.7473	13.8687	33.6747	0.000252269	1.81634	up	K00430|1.6e-146|bna:106402051|K00430 peroxidase [EC:1.11.1.7] | (RefSeq) peroxidase 4-like	Phenylpropanoid biosynthesis (ko00940)
gene_Bol034581	7.6405	5.25863	8.21813	2.27477	5.29801	2.74309	0.00836188	-0.959302	down	K00791|3.7e-271|bna:106386723|K00791 tRNA dimethylallyltransferase [EC:2.5.1.75] | (RefSeq) tRNA dimethylallyltransferase 9-like	Zeatin biosynthesis (ko00908)
gene_Bol005084	30.5105	25.9019	21.3912	35.7611	35.0405	59.5493	0.00667184	0.871819	up	K10775|0.0e+00|bna:106371451|K10775 phenylalanine ammonia-lyase [EC:4.3.1.24] | (RefSeq) phenylalanine ammonia-lyase 2-like	Phenylalanine metabolism (ko00360);; Phenylpropanoid biosynthesis (ko00940)
gene_Bol023285	3.41848	2.77736	2.12287	2.6567	4.99446	7.01255	0.0396888	0.937846	up	--	--
gene_Bol025617	83.783	61.3848	68.6371	117.292	187.664	92.4407	0.000193106	0.965428	up	--	--
Brassica_oleracea_newGene_2610	2.038	1.57326	0.927107	0.60265	0.783858	0.427186	0.0280569	-1.2315	down	--	--
Brassica_oleracea_newGene_7831	3.33831	3.37332	0.741533	7.12343	3.81053	7.22314	0.0174387	1.40378	up	K00993|3.7e-20|bna:106453259|K00993 ethanolaminephosphotransferase [EC:2.7.8.1] | (RefSeq) uncharacterized protein LOC106453259	Phosphonate and phosphinate metabolism (ko00440);; Glycerophospholipid metabolism (ko00564);; Ether lipid metabolism (ko00565)
gene_Bol045647	52.5504	47.9729	25.1826	62.4679	70.4043	60.8686	0.0173524	0.716112	up	--	--
gene_Bol011200	3.69491	1.75056	2.55707	6.49133	3.51952	4.71548	0.0261766	1.00094	up	--	--
gene_Bol015380	27.8609	32.4262	48.6646	27.4828	20.7021	14.7052	0.0375813	-0.695692	down	K02962|2.2e-67|boe:106332969|K02962 small subunit ribosomal protein S17e | (RefSeq) 40S ribosomal protein S17-2-like	Ribosome (ko03010)
gene_Bol011969	12.9109	10.5954	6.75098	29.0022	17.4696	27.7482	0.000153032	1.41309	up	K13989|1.7e-134|bna:106360989|K13989 Derlin-2/3 | (RefSeq) derlin-2.1	Protein processing in endoplasmic reticulum (ko04141)
Brassica_oleracea_newGene_11384	8.20745	5.67434	4.73062	13.7609	10.9812	9.00355	0.000885518	0.954792	up	K05387|0.0e+00|boe:106323001|K05387 glutamate receptor, ionotropic, plant | (RefSeq) glutamate receptor 1.3-like	--
gene_Bol008590	3.37471	3.01274	1.56289	6.37257	4.29571	10.1354	0.00144865	1.52106	up	K07198|8.1e-142|pda:103715405|K07198 5'-AMP-activated protein kinase, catalytic alpha subunit [EC:2.7.11.11] | (RefSeq) CBL-interacting protein kinase 5	--
gene_Bol026483	5.39794	2.8484	4.37416	8.2948	4.63412	8.72786	0.0223785	0.912934	up	K10728|1.6e-07|dcr:108214466|K10728 topoisomerase (DNA) II binding protein 1 | (RefSeq) DNA topoisomerase 2-binding protein 1-A	Homologous recombination (ko03440)
gene_Bol042222	3.11062	3.82087	4.19064	0.842537	2.2396	2.20112	0.0358524	-0.976691	down	K05658|4.6e-104|cpep:111781709|K05658 ATP-binding cassette, subfamily B (MDR/TAP), member 1 [EC:7.6.2.2] | (RefSeq) uncharacterized protein LOC111781709	ABC transporters (ko02010)
gene_Bol044875	3.14384	3.0743	4.36658	1.3594	0.505757	0.708443	4.2e-05	-1.91395	down	--	--
gene_Bol021160	2.37387	1.89318	1.48181	3.3002	4.47422	5.44045	0.000577026	1.30383	up	K15119|4.3e-239|boe:106307394|K15119 solute carrier family 25, member 39/40 | (RefSeq) mitochondrial carrier protein MTM1-like	--
gene_Bol011164	179.508	164.445	125.839	250.871	171.432	231.802	0.027589	0.593226	up	K00521|3.8e-44|cmos:111447866|K00521 ferric-chelate reductase [EC:1.16.1.7] | (RefSeq) ferric reduction oxidase 7, chloroplastic-like	--
gene_Bol028619	4.19827	3.52891	4.92698	10.2608	5.70694	8.51334	0.0205436	1.06666	up	--	--
Brassica_oleracea_newGene_11756	6.41552	4.49589	7.42452	2.0111	3.80194	2.18355	0.0243515	-0.989478	down	--	--
gene_Bol018731	2.38826	2.97771	0.573066	6.78129	5.16499	4.15154	0.00547621	1.52293	up	K05641|1.8e-62|ota:OT_ostta18g01310|K05641 ATP-binding cassette, subfamily A (ABC1), member 1 | (RefSeq) ABC transporter, conserved site	ABC transporters (ko02010)
Brassica_oleracea_newGene_8297	4.29625	2.89549	2.81347	4.30889	9.13331	3.60335	0.0357586	0.820097	up	--	--
gene_Bol016571	0.747037	1.62457	2.52474	0.584272	0.701338	0.317135	0.0150407	-1.51758	down	K00521|7.3e-24|cmos:111447866|K00521 ferric-chelate reductase [EC:1.16.1.7] | (RefSeq) ferric reduction oxidase 7, chloroplastic-like	--
gene_Bol015130	2.03633	3.43424	0.975723	6.84168	6.65496	7.99191	0.000256831	1.83039	up	--	--
gene_Bol018920	1.09697	1.23293	0.56235	2.72958	4.25567	1.34321	0.00559974	1.55808	up	K01074|5.0e-171|boe:106316853|K01074 palmitoyl-protein thioesterase [EC:3.1.2.22] | (RefSeq) palmitoyl-protein thioesterase 3-like isoform X1	Fatty acid elongation (ko00062);; Fatty acid metabolism (ko01212)
Brassica_oleracea_newGene_8595	1.09712	0.856965	8.45422	0.066629	1.87194	0.946186	0.0360113	-2.15132	down	K01620|4.2e-162|boe:106312120|K01620 threonine aldolase [EC:4.1.2.48] | (RefSeq) probable low-specificity L-threonine aldolase 1	Glycine, serine and threonine metabolism (ko00260);; Biosynthesis of amino acids (ko01230)
gene_Bol026380	12.3548	10.4322	12.195	8.39357	6.88252	4.37631	0.030427	-0.731736	down	--	--
Brassica_oleracea_newGene_11716	0.524582	0.608894	0.531754	1.09364	0.848392	0.811608	0.0129934	0.817614	up	K21396|3.6e-53|gsl:Gasu_36200|K21396 ATP-binding cassette, subfamily G (WHITE), eye pigment precursor transporter | (RefSeq) ABC transporter, ATP-binding protein	--
gene_Bol028966	7.81443	9.28508	5.65008	15.2275	12.206	12.1149	0.00469734	0.892348	up	K20858|1.7e-95|boe:106324010|K20858 calcium uniporter protein, mitochondrial | (RefSeq) calcium uniporter protein 1, mitochondrial	--
gene_Bol014220	45.0867	46.9792	24.2721	78.2495	87.1345	92.5772	4.16e-05	1.2491	up	K14504|2.1e-168|boe:106321330|K14504 xyloglucan:xyloglucosyl transferase TCH4 [EC:2.4.1.207] | (RefSeq) xyloglucan endotransglucosylase/hydrolase protein 22	Plant hormone signal transduction (ko04075)
gene_Bol022073	12.2746	11.4051	14.8414	5.73773	12.0476	5.88492	0.0318463	-0.63506	down	K19986|0.0e+00|bna:106410075|K19986 exocyst complex component 8 | (RefSeq) exocyst complex component EXO84C	--
gene_Bol035501	8.21804	5.34815	5.04813	9.45942	20.2855	6.49295	0.0122726	1.00854	up	--	--
gene_Bol014185	49.2511	49.3361	120.116	27.1586	61.4441	23.6545	0.0465411	-0.898403	down	--	--
Brassica_oleracea_newGene_10034	4.69326	4.75026	2.86745	1.75132	2.97481	1.3939	0.0314031	-0.934299	down	--	--
gene_Bol022396	7.17762	6.8665	5.41953	7.80914	11.1511	10.2832	0.003608	0.682085	up	K08869|0.0e+00|boe:106306273|K08869 aarF domain-containing kinase | (RefSeq) uncharacterized protein LOC106306273	--
gene_Bol035512	12.7443	10.808	20.5519	10.1762	9.80754	7.33139	0.033189	-0.593106	down	K05666|0.0e+00|cit:102618233|K05666 ATP-binding cassette, subfamily C (CFTR/MRP), member 2 | (RefSeq) ABC transporter C family member 3-like isoform X1	ABC transporters (ko02010)
gene_Bol007927	19.1556	12.8096	17.2488	28.453	26.2692	15.429	0.0359034	0.598053	up	--	--
gene_Bol024394	4.56602	7.30444	2.38689	5.24765	13.4374	12.8079	0.0423809	1.21316	up	K08235|8.9e-44|bna:106444424|K08235 xyloglucan:xyloglucosyl transferase [EC:2.4.1.207] | (RefSeq) probable xyloglucan endotransglucosylase/hydrolase protein 29	--
gene_Bol042497	19.2072	24.6352	30.1764	42.1071	25.5973	40.6319	0.0357627	0.674549	up	K02932|3.7e-161|bna:111197839|K02932 large subunit ribosomal protein L5e | (RefSeq) 60S ribosomal protein L5-1	Ribosome (ko03010)
Brassica_oleracea_newGene_4314	0.937013	0.647843	0.711292	0.161767	0	0.101801	0.0046925	-2.7926	down	--	--
gene_Bol022825	13.455	21.6807	41.9507	194.257	24.25	64.1037	0.00270255	2.01014	up	K16292|1.4e-67|vvi:100247167|K16292 KDEL-tailed cysteine endopeptidase [EC:3.4.22.-] | (RefSeq) senescence-specific cysteine protease SAG39	--
gene_Bol028440	32.7706	18.7476	9.26082	38.1573	38.3357	32.1553	0.0242851	0.932389	up	K14638|3.3e-245|gra:105773696|K14638 solute carrier family 15 (peptide/histidine transporter), member 3/4 | (RefSeq) protein NRT1/ PTR FAMILY 7.2-like	--
gene_Bol031853	5.4593	6.85855	7.57716	3.9267	4.2528	2.89972	0.0267675	-0.744504	down	K13195|6.6e-48|bna:106433663|K13195 cold-inducible RNA-binding protein | (RefSeq) glycine-rich RNA-binding protein 2-like	--
gene_Bol041435	40.6626	43.7311	29.4899	60.7782	53.7802	64.8716	0.00422978	0.76376	up	--	--
gene_Bol040883	26.6101	38.1398	134.694	16.1288	38.5122	23.0158	0.024097	-1.27663	down	K13229|1.3e-39|sbi:8070754|K13229 2,4-dihydroxy-1,4-benzoxazin-3-one-glucoside dioxygenase [EC:1.14.11.59] | (RefSeq) DIBOA-glucoside dioxygenase BX6	Benzoxazinoid biosynthesis (ko00402)
gene_Bol024645	1.46336	2.77379	3.28755	0.983738	0.695277	1.36574	0.0243222	-1.16903	down	K01858|2.7e-247|bna:106416365|K01858 myo-inositol-1-phosphate synthase [EC:5.5.1.4] | (RefSeq) probable inositol 3-phosphate synthase isozyme 3	Inositol phosphate metabolism (ko00562)
Brassica_oleracea_newGene_3743	1.65931	1.56268	0.865495	3.42037	4.87104	4.91419	0.00229449	1.73447	up	--	--
gene_Bol038389	1.66204	0.721894	1.2538	0.240214	0.788962	0.31193	0.0312708	-1.34283	down	K01904|6.4e-312|bna:106397425|K01904 4-coumarate--CoA ligase [EC:6.2.1.12] | (RefSeq) 4-coumarate--CoA ligase 4	Ubiquinone and other terpenoid-quinone biosynthesis (ko00130);; Phenylpropanoid biosynthesis (ko00940)
gene_Bol044797	11.5284	9.35295	15.208	6.17493	6.56629	7.92417	0.0233758	-0.686206	down	K10949|3.2e-126|lang:109338601|K10949 ER lumen protein retaining receptor | (RefSeq) putative ER lumen protein-retaining receptor C28H8.4	--
gene_Bol019268	2.99829	2.0294	20.719	3.1945	1.66837	1.01248	0.0299159	-1.98285	down	--	--
gene_Bol030474	4.30234	2.72071	3.38622	6.47741	7.37223	3.94425	0.00291272	0.852557	up	K10908|0.0e+00|boe:106319521|K10908 DNA-directed RNA polymerase, mitochondrial [EC:2.7.7.6] | (RefSeq) LOW QUALITY PROTEIN: DNA-directed RNA polymerase 2, chloroplastic/mitochondrial	--
gene_Bol043354	128.335	41.976	24.361	184.732	125.177	86.3398	0.0414658	1.12146	up	K16190|6.8e-168|boe:106316392|K16190 glucuronokinase [EC:2.7.1.43] | (RefSeq) probable glucuronokinase 2	Pentose and glucuronate interconversions (ko00040);; Ascorbate and aldarate metabolism (ko00053);; Amino sugar and nucleotide sugar metabolism (ko00520)
gene_Bol021278	2.6043	5.77287	8.20506	0.37804	1.19563	0	0.00050988	-3.39456	down	K01653|4.3e-259|bna:106363577|K01653 acetolactate synthase I/III small subunit [EC:2.2.1.6] | (RefSeq) acetolactate synthase small subunit 1, chloroplastic isoform X1	Valine, leucine and isoleucine biosynthesis (ko00290);; Butanoate metabolism (ko00650);; C5-Branched dibasic acid metabolism (ko00660);; Pantothenate and CoA biosynthesis (ko00770);; 2-Oxocarboxylic acid metabolism (ko01210);; Biosynthesis of amino acids (ko01230)
gene_Bol044448	13.6126	12.9047	18.2962	9.78242	10.9225	5.85023	0.0126795	-0.672324	down	K01939|6.8e-284|boe:106312646|K01939 adenylosuccinate synthase [EC:6.3.4.4] | (RefSeq) adenylosuccinate synthetase, chloroplastic	Purine metabolism (ko00230);; Alanine, aspartate and glutamate metabolism (ko00250)
gene_Bol012960	4.39333	6.51557	5.67722	7.95724	10.8406	13.6138	0.00818709	1.06137	up	--	--
gene_Bol027357	14.8437	18.5083	18.4031	8.63281	10.3432	8.70133	4.67e-05	-0.80705	down	K07767|6.7e-221|boe:106337299|K07767 katanin p60 ATPase-containing subunit A1 [EC:5.6.1.1] | (RefSeq) katanin p60 ATPase-containing subunit A-like 2 isoform X1	--
gene_Bol010724	86.9693	88.9495	64.9337	129.654	132.338	121.471	9.33e-05	0.767564	up	K16280|1.3e-231|bna:106388678|K16280 E3 ubiquitin-protein ligase RGLG [EC:2.3.2.27] | (RefSeq) E3 ubiquitin-protein ligase RGLG1	--
gene_Bol012544	2.73155	1.55578	3.26953	0.061494	0.766203	1.17126	0.0401571	-1.75838	down	--	--
gene_Bol006849	5.45915	9.22797	1.05054	9.35132	8.49772	29.0871	0.0239928	1.71396	up	K00384|2.5e-07|vvi:109124153|K00384 thioredoxin reductase (NADPH) [EC:1.8.1.9] | (RefSeq) thioredoxin reductase 1-like	Selenocompound metabolism (ko00450)
gene_Bol021423	18.4629	24.3526	30.0556	11.7978	16.1351	14.9894	0.00967315	-0.664355	down	K15919|1.0e-172|bna:106383064|K15919 glyoxylate/hydroxypyruvate reductase [EC:1.1.1.79 1.1.1.81] | (RefSeq) glyoxylate/hydroxypyruvate reductase A HPR2	Glycine, serine and threonine metabolism (ko00260);; Glyoxylate and dicarboxylate metabolism (ko00630);; Carbon metabolism (ko01200)
gene_Bol006573	298.936	321.368	194.781	402.192	291.146	451.644	0.0497754	0.609384	up	K03444|7.4e-278|boe:106312125|K03444 MFS transporter, SP family, ERD6-like sugar transporter | (RefSeq) sugar transporter ERD6	--
gene_Bol014864	6.74402	5.91855	6.02512	1.82868	5.46294	3.08086	0.0405036	-0.778762	down	K13648|0.0e+00|bna:106381938|K13648 alpha-1,4-galacturonosyltransferase [EC:2.4.1.43] | (RefSeq) probable galacturonosyltransferase 4	Amino sugar and nucleotide sugar metabolism (ko00520)
gene_Bol030660	1211.19	1153.46	1194.68	564.187	588.457	682.641	5.49e-06	-0.845008	down	K00799|8.2e-117|bna:106388604|K00799 glutathione S-transferase [EC:2.5.1.18] | (RefSeq) glutathione S-transferase F3-like	Glutathione metabolism (ko00480)
gene_Bol041790	12.7763	10.5936	11.9121	18.6338	17.8272	15.4664	0.000567948	0.657114	up	K08500|8.7e-08|pxb:103931018|K08500 syntaxin of plants SYP6 | (RefSeq) syntaxin-61-like isoform X1	SNARE interactions in vesicular transport (ko04130)
gene_Bol036799	1.05462	1.05663	0.636139	2.04133	1.54303	1.58183	0.0462382	1.00305	up	K06173|5.1e-146|boe:106294874|K06173 tRNA pseudouridine38-40 synthase [EC:5.4.99.12] | (RefSeq) tRNA pseudouridine synthase A	--
gene_Bol039789	7.16289	12.6894	9.22642	11.5845	45.6624	10.1539	0.025688	1.23211	up	K15406|4.4e-34|ath:AT5G37300|K15406 wax-ester synthase / diacylglycerol O-acyltransferase [EC:2.3.1.75 2.3.1.20] | (RefSeq) WSD1; O-acyltransferase (WSD1-like) family protein	Cutin, suberine and wax biosynthesis (ko00073)
gene_Bol045512	6.42813	4.38203	14.1723	4.78056	2.48048	3.5136	0.0285545	-1.07907	down	K03797|3.5e-272|boe:106308109|K03797 carboxyl-terminal processing protease [EC:3.4.21.102] | (RefSeq) carboxyl-terminal-processing peptidase 3, chloroplastic-like	--
gene_Bol042981	10.2675	15.8937	42.2837	5.32953	11.4867	2.6623	0.00253146	-1.7659	down	K13260|5.7e-261|bna:106391411|K13260 isoflavone/4'-methoxyisoflavone 2'-hydroxylase [EC:1.14.14.90 1.14.14.89] | (RefSeq) cytochrome P450 81D11-like	Isoflavonoid biosynthesis (ko00943)
gene_Bol013798	2.07743	1.89204	1.42138	3.08437	2.68534	4.39925	0.00948114	1.03124	up	K01180|7.8e-29|cmax:111487562|K01180 endo-1,3(4)-beta-glucanase [EC:3.2.1.6] | (RefSeq) uncharacterized protein LOC111487562	--
gene_Bol029457	9.19312	14.5537	10.8686	6.22137	8.10239	6.4588	0.0333638	-0.645817	down	K00432|6.4e-108|boe:106328311|K00432 glutathione peroxidase [EC:1.11.1.9] | (RefSeq) probable glutathione peroxidase 3, mitochondrial	Glutathione metabolism (ko00480);; Arachidonic acid metabolism (ko00590)
gene_Bol043141	36.3089	47.7664	40.0294	12.3644	12.6054	10.1657	2.98e-17	-1.72834	down	K14152|6.0e-68|cpep:111783531|K14152 phosphoribosyl-ATP pyrophosphohydrolase / phosphoribosyl-AMP cyclohydrolase / histidinol dehydrogenase [EC:3.6.1.31 3.5.4.19 1.1.1.23] | (RefSeq) uncharacterized protein LOC111783531	Histidine metabolism (ko00340);; Biosynthesis of amino acids (ko01230)
gene_Bol025606	130.953	119.96	51.7641	206.797	184.437	192.737	0.0032468	1.04863	up	K00020|7.8e-23|mtr:MTR_8g088900|K00020 3-hydroxyisobutyrate dehydrogenase [EC:1.1.1.31] | (RefSeq) 6-phosphogluconate dehydrogenase-like protein	Valine, leucine and isoleucine degradation (ko00280)
gene_Bol031576	40.5865	44.3533	59.9096	21.8193	35.4651	31.7117	0.0191255	-0.604668	down	K21604|1.2e-255|bna:106346506|K21604 jasmonoyl-L-amino acid hydrolase [EC:3.5.1.127] | (RefSeq) IAA-amino acid hydrolase ILR1-like 4	--
gene_Bol042419	8.58835	7.60577	3.46637	13.3908	8.0198	13.0945	0.0260278	0.931824	up	K00820|0.0e+00|boe:106328779|K00820 glutamine---fructose-6-phosphate transaminase (isomerizing) [EC:2.6.1.16] | (RefSeq) glutamine--fructose-6-phosphate aminotransferase [isomerizing] 2-like	Alanine, aspartate and glutamate metabolism (ko00250);; Amino sugar and nucleotide sugar metabolism (ko00520)
gene_Bol027150	1.30335	1.28577	0.729541	2.25049	3.53143	2.15888	0.00214073	1.33044	up	K14191|7.4e-195|boe:106307091|K14191 18S rRNA (adenine1779-N6/adenine1780-N6)-dimethyltransferase [EC:2.1.1.183] | (RefSeq) ribosomal RNA small subunit methyltransferase, mitochondrial	--
gene_Bol008465	2.4963	2.76743	5.09454	1.52004	1.59877	2.21566	0.0242518	-0.831822	down	K17592|0.0e+00|sita:101760663|K17592 sacsin | (RefSeq) uncharacterized protein LOC101760663	--
gene_Bol025917	21.3428	13.3696	27.2095	11.6037	2.4304	6.04946	0.0134076	-1.47371	down	--	--
gene_Bol021751	54.092	47.4986	54.9742	35.7584	24.055	32.3495	0.0121533	-0.64628	down	K17497|6.9e-99|bna:106392039|K17497 phosphomannomutase [EC:5.4.2.8] | (RefSeq) phosphomannomutase	Fructose and mannose metabolism (ko00051);; Amino sugar and nucleotide sugar metabolism (ko00520)
gene_Bol004760	20.923	20.9692	17.8573	24.9875	34.759	29.8249	0.000625556	0.676302	up	K08900|2.0e-14|jcu:105628818|K08900 mitochondrial chaperone BCS1 | (RefSeq) AAA-ATPase At3g50940	--
gene_Bol022023	1.91609	0.813274	4.88226	0.553684	1.19633	0.380641	0.0155736	-1.74677	down	K16224|5.2e-49|boe:106304564|K16224 senescence-induced receptor-like serine/threonine-protein kinase | (RefSeq) senescence-induced receptor-like serine/threonine-protein kinase	MAPK signaling pathway - plant (ko04016);; Plant-pathogen interaction (ko04626)
gene_Bol045454	2.47089	3.94873	1.66201	6.86887	2.86724	6.87942	0.0248506	1.16462	up	K00555|8.8e-251|boe:106307838|K00555 tRNA (guanine26-N2/guanine27-N2)-dimethyltransferase [EC:2.1.1.215 2.1.1.216] | (RefSeq) tRNA (guanine(26)-N(2))-dimethyltransferase-like	--
gene_Bol029090	4.30474	3.81536	4.67645	1.78826	0.754014	1.57211	0.00152579	-1.48216	down	--	--
gene_Bol042549	39.5848	33.5836	62.3601	105.349	64.895	59.6913	0.0108187	0.871592	up	K08341|6.7e-60|bna:106426764|K08341 GABA(A) receptor-associated protein | (RefSeq) autophagy-related protein 8d	Autophagy - other (ko04136)
gene_Bol023606	2.34033	3.34047	3.85061	12.9111	4.54453	13.2107	0.000207364	1.82615	up	--	--
gene_Bol027618	31.0886	26.813	29.8186	12.4998	12.7969	18.9284	0.00141733	-0.865135	down	K00895|0.0e+00|boe:106301038|K00895 diphosphate-dependent phosphofructokinase [EC:2.7.1.90] | (RefSeq) pyrophosphate--fructose 6-phosphate 1-phosphotransferase subunit alpha 2	Glycolysis / Gluconeogenesis (ko00010);; Pentose phosphate pathway (ko00030);; Fructose and mannose metabolism (ko00051)
gene_Bol007610	109.764	104.064	82.178	171.458	99.4028	154.924	0.03041	0.646019	up	K18674|3.4e-283|bna:106401687|K18674 N-acetylgalactosamine kinase [EC:2.7.1.157] | (RefSeq) galactokinase	--
gene_Bol018263	10.2268	10.9505	8.97153	15.4891	13.5537	15.6185	0.0176752	0.668938	up	K24345|2.1e-70|bna:106399334|K24345 calcium-binding protein KIC and related proteins | (RefSeq) calcium-binding protein PBP1	--
gene_Bol025407	45.5472	52.2555	22.4324	73.5394	51.069	61.084	0.046545	0.731139	up	K14496|4.9e-111|boe:106337293|K14496 abscisic acid receptor PYR/PYL family | (RefSeq) abscisic acid receptor PYL6	MAPK signaling pathway - plant (ko04016);; Plant hormone signal transduction (ko04075)
gene_Bol016387	6.12649	6.50626	10.5693	5.66407	3.63136	2.62255	0.0307336	-0.858138	down	K07059|3.1e-57|olu:OSTLU_26597|K07059 uncharacterized protein | (RefSeq) predicted protein	--
gene_Bol030256	15.0777	15.7727	11.5672	26.4291	15.2252	23.6396	0.0280065	0.740392	up	--	--
Brassica_oleracea_newGene_3444	0.935103	0.450054	17.339	0.748148	0.196358	0.329707	0.000809309	-3.69799	down	--	--
gene_Bol014260	10.2367	10.0678	7.58041	16.0235	10.5242	12.9263	0.03191	0.611804	up	K16189|1.7e-06|peq:110028745|K16189 phytochrome-interacting factor 4 | (RefSeq) transcription factor PIF4-like isoform X1	Plant hormone signal transduction (ko04075)
gene_Bol008289	45.2616	44.2985	80.3876	25.307	42.7748	21.8957	0.00718322	-0.84206	down	K03798|0.0e+00|boe:106341739|K03798 cell division protease FtsH [EC:3.4.24.-] | (RefSeq) ATP-dependent zinc metalloprotease FTSH 2, chloroplastic	--
gene_Bol028899	105.949	118.707	84.1068	161.045	134.849	185.692	0.00380828	0.755818	up	K10523|5.1e-13|smo:SELMODRAFT_438494|K10523 speckle-type POZ protein | (RefSeq) hypothetical protein	--
gene_Bol010683	13.4552	9.28717	13.0489	22.2843	16.6009	22.3349	0.00149877	0.894234	up	--	--
gene_Bol015094	4.04894	4.98388	2.20842	8.00943	8.2973	10.8139	0.00200299	1.36468	up	K14488|1.7e-90|bna:106385966|K14488 SAUR family protein | (RefSeq) auxin-responsive protein SAUR71	Plant hormone signal transduction (ko04075)
gene_Bol023103	10.3728	10.7313	13.5925	6.49421	7.21617	5.72109	0.000717007	-0.740453	down	K00856|5.6e-200|boe:106302967|K00856 adenosine kinase [EC:2.7.1.20] | (RefSeq) adenosine kinase 1	Purine metabolism (ko00230)
gene_Bol036816	36.1054	45.4399	41.1654	24.9157	33.3309	18.3501	0.00734472	-0.606	down	K03233|6.5e-227|bna:106401045|K03233 elongation factor 1-gamma | (RefSeq) probable elongation factor 1-gamma 1	--
gene_Bol018679	61.6582	41.2759	69.1814	28.4933	24.1371	14.5778	2.97e-05	-1.26392	down	--	--
gene_Bol034693	2.61822	1.94566	0.954295	7.40979	7.37858	5.1027	3.81e-05	1.9211	up	--	--
gene_Bol038546	3.34758	3.10377	6.54676	0.840182	2.02748	2.0266	0.00491931	-1.30312	down	K00695|4.5e-91|mtr:MTR_6g478030|K00695 sucrose synthase [EC:2.4.1.13] | (RefSeq) sucrose synthase	Starch and sucrose metabolism (ko00500)
gene_Bol036129	3.04833	3.98987	3.05904	13.3398	4.00807	5.50126	0.0168718	1.28775	up	--	--
gene_Bol044271	34.2623	31.6042	36.7465	75.921	50.0833	53.8205	0.000200789	0.918188	up	--	--
gene_Bol019267	47.8181	26.7713	10.8053	94.5376	33.7407	86.6011	0.00998382	1.46827	up	K20858|5.5e-95|boe:106317342|K20858 calcium uniporter protein, mitochondrial | (RefSeq) calcium uniporter protein 3, mitochondrial-like	--
gene_Bol022049	1.20232	4.21324	2.66417	5.0912	5.18517	5.49928	0.0362411	1.06258	up	K14492|1.1e-117|boe:106308087|K14492 two-component response regulator ARR-A family | (RefSeq) two-component response regulator ARR4-like	Plant hormone signal transduction (ko04075)
gene_Bol024368	1.08454	1.40495	0.424276	2.26123	4.55248	2.52324	0.000874676	1.73021	up	K16226|3.7e-108|bna:106437687|K16226 disease resistance protein RPS4 | (RefSeq) disease resistance protein RPS4-like	Plant-pathogen interaction (ko04626)
gene_Bol044572	18.4593	18.787	14.3803	32.3731	21.5953	34.9774	0.00262541	0.907362	up	K08900|9.4e-161|lja:Lj3g3v2478860.1|K08900 mitochondrial chaperone BCS1 | (RefSeq) Lj3g3v2478860.1; -	--
gene_Bol006759	21.6353	14.4329	27.107	13.2238	12.3428	7.37417	0.00559317	-0.847559	down	--	--
gene_Bol017685	11.1701	7.51563	4.87786	12.647	16.4483	11.5233	0.0225363	0.868376	up	--	--
gene_Bol036959	4.92772	3.93655	6.95232	1.22685	3.05858	1.24464	0.00705461	-1.43046	down	K02356|6.0e-55|bna:106436324|K02356 elongation factor P | (RefSeq) uncharacterized protein LOC106436324	--
gene_Bol030989	19.5086	21.3831	14.8326	26.4507	41.0993	33.2477	0.000144455	0.942145	up	K14963|1.6e-30|pvu:PHAVU_009G108900g|K14963 COMPASS component SWD3 | (RefSeq) hypothetical protein	--
gene_Bol028505	8.7035	8.16491	13.8112	2.50498	8.22967	3.93562	0.0217973	-0.99866	down	--	--
gene_Bol042189	3.17431	3.20177	3.22345	1.37398	1.6352	1.36126	0.000988824	-1.02858	down	K01076|1.5e-211|boe:106301609|K01076 abhydrolase domain-containing protein 17 [EC:3.1.2.22] | (RefSeq) alpha/beta hydrolase domain-containing protein 17C-like	--
Brassica_oleracea_newGene_6145	1.68651	2.03925	0.609757	4.42129	3.42729	3.27683	0.0121135	1.44432	up	--	--
gene_Bol007261	13.5131	15.8177	6.98188	18.4441	17.8683	25.4736	0.0195116	0.879846	up	--	--
gene_Bol027935	4.51967	4.53129	5.79934	7.7569	9.20139	7.08878	0.000276303	0.789267	up	K20168|2.6e-40|ath:AT5G52580|K20168 TBC1 domain family member 15 | (RefSeq) RabGAP/TBC domain-containing protein	--
gene_Bol015117	14.7851	19.5078	10.0042	5.33653	2.95449	4.22601	6.86e-06	-1.70879	down	K01580|5.4e-289|bna:111212508|K01580 glutamate decarboxylase [EC:4.1.1.15] | (RefSeq) glutamate decarboxylase 4 isoform X1	Alanine, aspartate and glutamate metabolism (ko00250);; beta-Alanine metabolism (ko00410);; Taurine and hypotaurine metabolism (ko00430);; Butanoate metabolism (ko00650)
gene_Bol005449	174.815	138.444	102.351	179.037	174.918	237.727	0.0302524	0.626051	up	K16280|8.4e-58|csat:104750588|K16280 E3 ubiquitin-protein ligase RGLG [EC:2.3.2.27] | (RefSeq) E3 ubiquitin-protein ligase RGLG2-like isoform X1	--
gene_Bol026871	247.29	228.867	274.359	252.401	596.676	362.975	0.00782058	0.766657	up	--	--
gene_Bol039859	0.64055	0.950231	0.857564	1.13261	1.79114	1.22914	0.0405006	0.835751	up	K08176|4.8e-307|bna:106424952|K08176 MFS transporter, PHS family, inorganic phosphate transporter | (RefSeq) probable inorganic phosphate transporter 1-9	--
gene_Bol015174	2.11422	1.82214	2.72071	1.35463	1.31621	0.859544	0.0311799	-0.81344	down	K09422|1.8e-254|boe:106319136|K09422 transcription factor MYB, plant | (RefSeq) myb-related protein 3R-1	--
gene_Bol039000	32.6086	23.6383	41.5842	16.9601	17.8358	14.9523	0.000289838	-0.874152	down	K10999|2.2e-18|hbr:110631887|K10999 cellulose synthase A [EC:2.4.1.12] | (RefSeq) cellulose synthase A catalytic subunit 8 [UDP-forming]	--
gene_Bol036769	36.0103	27.2563	32.854	48.3278	48.8607	41.7916	0.000298822	0.63146	up	K00826|1.3e-151|bna:106350639|K00826 branched-chain amino acid aminotransferase [EC:2.6.1.42] | (RefSeq) branched-chain-amino-acid aminotransferase 1, mitochondrial isoform X1	Cysteine and methionine metabolism (ko00270);; Valine, leucine and isoleucine degradation (ko00280);; Valine, leucine and isoleucine biosynthesis (ko00290);; Pantothenate and CoA biosynthesis (ko00770);; Glucosinolate biosynthesis (ko00966);; 2-Oxocarboxylic acid metabolism (ko01210);; Biosynthesis of amino acids (ko01230)
gene_Bol035232	8.7188	3.071	5.42916	15.5233	10.7903	19.7636	0.00320149	1.54969	up	K06617|1.8e-32|boe:106328576|K06617 raffinose synthase [EC:2.4.1.82] | (RefSeq) probable galactinol--sucrose galactosyltransferase 1 isoform X1	Galactose metabolism (ko00052)
gene_Bol031529	356.126	384.63	287.475	518.572	587.869	654.902	6.84e-05	0.88157	up	--	--
gene_Bol036777	3.64623	4.0562	4.2383	1.03054	3.11017	1.81038	0.0391181	-0.92041	down	K15378|9.1e-173|bna:106402293|K15378 solute carrier family 45, member 1/2/4 | (RefSeq) sucrose transport protein SUC4	--
gene_Bol034995	83.9296	69.4887	128.689	54.6581	67.3836	41.4971	0.0111274	-0.698483	down	--	--
gene_Bol016410	17.1306	16.2563	6.06711	22.5369	36.4805	22.9419	0.00540183	1.1268	up	K07192|2.4e-225|boe:106326646|K07192 flotillin | (RefSeq) flotillin-like protein 1 isoform X1	--
Brassica_oleracea_newGene_11539	3.85797	4.81217	3.30086	6.63447	5.61172	6.67957	0.00544926	0.791217	up	--	--
gene_Bol011116	5.39932	3.90907	3.76214	7.23864	5.5289	11.513	0.0184929	1.03064	up	--	--
gene_Bol023270	23.0669	23.1146	48.1486	7.02349	24.4681	6.83773	0.0135451	-1.25525	down	--	--
gene_Bol027432	53.6028	49.9604	99.0668	28.1249	44.0228	35.8851	0.0137834	-0.807545	down	--	--
gene_Bol026462	39.6352	52.3347	18.9591	70.4137	54.8909	80.245	0.0130452	1.00114	up	--	--
gene_Bol032541	22.7669	12.0712	26.9238	0.411646	0.287789	2.68321	6.76e-07	-3.9685	down	--	--
gene_Bol025815	6.20807	4.85184	6.65443	12.9641	11.7865	5.95515	0.0397548	0.875836	up	--	--
gene_Bol031466	9.0612	5.87089	111.046	3.41462	9.69941	5.58245	0.0310975	-2.66002	down	K24195|3.3e-126|ath:AT3G23430|K24195 xenotropic and polytropic retrovirus receptor 1 | (RefSeq) PHO1; phosphate 1	--
gene_Bol015274	0.831621	0.8045	1.14333	0.425555	0.543605	0.504636	0.0174326	-0.811968	down	K03850|1.7e-289|boe:106329468|K03850 alpha-1,2-glucosyltransferase [EC:2.4.1.256] | (RefSeq) putative Dol-P-Glc:Glc(2)Man(9)GlcNAc(2)-PP-Dol alpha-1,2-glucosyltransferase	N-Glycan biosynthesis (ko00510)
gene_Bol013634	47.7035	49.2984	35.9953	69.5029	47.612	81.7064	0.0249636	0.704353	up	--	--
gene_Bol020960	2.10338	3.43213	0.557722	7.91074	5.99655	7.31556	0.000848945	1.89329	up	K16224|9.6e-266|bna:106356473|K16224 senescence-induced receptor-like serine/threonine-protein kinase | (RefSeq) senescence-induced receptor-like serine/threonine-protein kinase	MAPK signaling pathway - plant (ko04016);; Plant-pathogen interaction (ko04626)
gene_Bol023003	42.8994	35.6933	29.4555	18.4188	26.3016	20.5249	0.00454752	-0.63837	down	--	--
gene_Bol022143	4.4195	4.2602	1.45054	9.6826	4.72928	8.16167	0.00911132	1.27195	up	K10406|0.0e+00|bna:106453167|K10406 kinesin family member C2/C3 | (RefSeq) kinesin-like protein KIN-14H	--
gene_Bol016270	3.33093	1.99162	2.58303	4.85643	4.40274	6.28549	0.00130309	1.09834	up	K03327|5.8e-297|boe:106313989|K03327 multidrug resistance protein, MATE family | (RefSeq) MATE efflux family protein 5-like	--
gene_Bol026266	9.63562	8.72446	15.3651	6.48956	8.55046	5.73594	0.038642	-0.606617	down	--	--
gene_Bol024384	58.8923	27.411	27.9544	63.4824	52.1581	63.1086	0.0279063	0.762001	up	K09843|3.1e-270|boe:106301431|K09843 (+)-abscisic acid 8'-hydroxylase [EC:1.14.14.137] | (RefSeq) abscisic acid 8'-hydroxylase 1	Carotenoid biosynthesis (ko00906)
Brassica_oleracea_newGene_5236	3.30355	4.79611	3.76555	1.77003	2.49054	2.20275	0.0155476	-0.923008	down	K07466|1.9e-12|boe:106336275|K07466 replication factor A1 | (RefSeq) uncharacterized protein LOC106336275	DNA replication (ko03030);; Nucleotide excision repair (ko03420);; Mismatch repair (ko03430);; Homologous recombination (ko03440)
gene_Bol037797	13.8676	19.1447	18.142	9.32002	6.87225	11.7171	0.0182229	-0.748593	down	K20784|0.0e+00|boe:106343041|K20784 arabinosyltransferase [EC:2.4.2.-] | (RefSeq) uncharacterized protein LOC106343041	Other types of O-glycan biosynthesis (ko00514)
gene_Bol039663	8.09086	7.39262	5.62978	9.29877	9.6699	10.5437	0.0239742	0.586696	up	K14411|4.0e-210|boe:106320913|K14411 RNA-binding protein Musashi | (RefSeq) heterogeneous nuclear ribonucleoprotein 1 isoform X1	mRNA surveillance pathway (ko03015)
gene_Bol038197	7.85926	10.8679	12.2011	4.53486	4.96005	3.55059	2.31e-05	-1.15302	down	K23544|3.0e-85|brp:103842861|K23544 serine incorporator 1/3 | (RefSeq) serine incorporator 3	--
gene_Bol035837	159.001	173.731	86.0914	200.693	251.683	301.752	0.00422459	0.953415	up	--	--
gene_Bol040979	589.563	676.094	451.95	983.595	857.721	1034.21	0.000562718	0.85146	up	--	--
Brassica_oleracea_newGene_11404	1.69711	1.84292	2.39331	0.544439	1.54905	0.685293	0.0342445	-1.01804	down	--	--
Brassica_oleracea_newGene_6067	3.76665	5.38399	5.32557	4.93584	8.87137	5.84131	0.0367473	0.635862	up	K18693|4.1e-21|bna:106365467|K18693 diacylglycerol diphosphate phosphatase / phosphatidate phosphatase [EC:3.1.3.81 3.1.3.4] | (RefSeq) lipid phosphate phosphatase 2-like	Glycerolipid metabolism (ko00561);; Glycerophospholipid metabolism (ko00564)
gene_Bol034868	37.5077	27.123	21.1015	45.0293	47.9607	45.2838	0.00160988	0.789854	up	K00454|0.0e+00|boe:106327768|K00454 lipoxygenase [EC:1.13.11.12] | (RefSeq) lipoxygenase 4, chloroplastic	Linoleic acid metabolism (ko00591);; alpha-Linolenic acid metabolism (ko00592)
Brassica_oleracea_newGene_2467	4.58643	3.12198	2.77667	5.27378	8.73873	5.44347	0.00231268	0.947639	up	--	--
gene_Bol019284	1.46334	2.8624	1.00718	5.46588	3.42799	3.38423	0.0125766	1.29421	up	K21630|6.4e-44|cpep:111804029|K21630 GATA-type zinc finger protein 1 | (RefSeq) GATA transcription factor 5-like isoform X1	--
gene_Bol036666	12.8648	10.8726	16.1515	22.092	15.6099	19.3836	0.0192071	0.634793	up	K09122|6.5e-81|sbi:8057957|K09122 uncharacterized protein | (RefSeq) uncharacterized protein LOC8057957	--
gene_Bol035127	35.5248	34.7362	20.6115	46.165	50.1156	87.4715	0.00267683	1.14126	up	--	--
gene_Bol034314	9.54374	7.83608	4.36257	11.9858	13.35	14.167	0.00294284	0.963483	up	K13024|0.0e+00|boe:106334855|K13024 inositol-hexakisphosphate/diphosphoinositol-pentakisphosphate 1-kinase [EC:2.7.4.24] | (RefSeq) inositol hexakisphosphate and diphosphoinositol-pentakisphosphate kinase 2 isoform X1	Phosphatidylinositol signaling system (ko04070)
gene_Bol017595	187.825	149.397	93.5614	240.75	204.502	276.202	0.00661659	0.859033	up	K08081|1.4e-147|boe:106339839|K08081 tropinone reductase I [EC:1.1.1.206] | (RefSeq) tropinone reductase homolog At2g30670-like isoform X1	Tropane, piperidine and pyridine alkaloid biosynthesis (ko00960)
gene_Bol041182	19.6513	22.6442	10.3877	31.597	47.3442	30.5134	0.000808598	1.12826	up	K02575|2.9e-133|bna:106412400|K02575 MFS transporter, NNP family, nitrate/nitrite transporter | (RefSeq) high-affinity nitrate transporter 2.1	Nitrogen metabolism (ko00910)
gene_Bol020885	3.34434	7.59558	5.8928	1.65215	3.4191	1.53367	0.0123058	-1.28729	down	--	--
gene_Bol012226	14.3364	20.4126	20.1935	8.8782	14.3955	7.88266	0.0082011	-0.744444	down	K01792|4.8e-182|bna:106402281|K01792 glucose-6-phosphate 1-epimerase [EC:5.1.3.15] | (RefSeq) putative glucose-6-phosphate 1-epimerase	Glycolysis / Gluconeogenesis (ko00010)
gene_Bol007605	2.21758	5.84002	4.4579	3.54374	14.9245	9.26022	0.0226558	1.21018	up	K21362|0.0e+00|boe:106295846|K21362 galactolipid galactosyltransferase [EC:2.4.1.184] | (RefSeq) beta-glucosidase-like SFR2, chloroplastic	Glycerolipid metabolism (ko00561)
gene_Bol004667	32.7803	31.9177	35.0433	10.302	13.0622	10.6566	3.96e-20	-1.45632	down	K14494|4.7e-205|bna:106389181|K14494 DELLA protein | (RefSeq) DELLA protein RGA1	Plant hormone signal transduction (ko04075)
gene_Bol010476	7.48957	7.54444	10.5573	3.38086	5.49603	3.94979	0.00108116	-0.906119	down	K07456|8.2e-15|vcn:VOLCADRAFT_121755|K07456 DNA mismatch repair protein MutS2 | (RefSeq) hypothetical protein	Mismatch repair (ko03430)
gene_Bol017626	5.43745	7.51052	6.92825	4.1522	4.32071	3.39874	0.0465447	-0.651115	down	K15235|4.1e-101|boe:106338189|K15235 josephin [EC:3.4.19.12] | (RefSeq) josephin-like protein	--
gene_Bol025102	21.1724	29.2934	17.5079	40.9568	30.1186	105.257	0.00215539	1.52909	up	K10775|0.0e+00|boe:106311920|K10775 phenylalanine ammonia-lyase [EC:4.3.1.24] | (RefSeq) phenylalanine ammonia-lyase 2	Phenylalanine metabolism (ko00360);; Phenylpropanoid biosynthesis (ko00940)
gene_Bol021541	21.044	9.45448	18.8349	8.66393	4.14782	3.77523	0.00718104	-1.43911	down	K15815|1.8e-25|brp:103830506|K15815 lupeol synthase 2 [EC:5.4.99.39 5.4.99.40 5.4.99.41] | (RefSeq) amyrin synthase LUP2 isoform X1	Sesquiterpenoid and triterpenoid biosynthesis (ko00909)
gene_Bol005615	2.13089	2.41956	1.53689	2.64737	4.30495	6.16731	0.00559697	1.22335	up	K09843|1.1e-270|bna:106379426|K09843 (+)-abscisic acid 8'-hydroxylase [EC:1.14.14.137] | (RefSeq) abscisic acid 8'-hydroxylase 3	Carotenoid biosynthesis (ko00906)
gene_Bol028365	178.938	220.256	65.2139	302.374	246.047	346.875	0.0149659	1.05633	up	K22395|1.8e-76|vvi:100250740|K22395 cinnamyl-alcohol dehydrogenase [EC:1.1.1.195] | (RefSeq) berberine bridge enzyme-like 15	Phenylpropanoid biosynthesis (ko00940)
gene_Bol031396	3.80997	4.2088	5.24732	1.63469	3.92691	1.19797	0.025482	-0.92327	down	K15436|0.0e+00|boe:106308430|K15436 transportin-3 | (RefSeq) importin-13	--
gene_Bol037005	3.79185	4.70484	2.88176	1.94279	1.15645	0.819717	0.00321969	-1.43118	down	K10088|3.2e-129|brp:103867521|K10088 protein OS-9 | (RefSeq) protein OS-9 homolog	Protein processing in endoplasmic reticulum (ko04141)
Brassica_oleracea_newGene_8908	0.696099	0.422039	0.281427	1.69922	1.16504	0.584389	0.034497	1.38021	up	K15255|8.1e-12|boe:106330833|K15255 ATP-dependent DNA helicase PIF1 [EC:3.6.4.12] | (RefSeq) uncharacterized protein LOC106330833	--
gene_Bol018660	51.5126	56.4555	33.641	64.0417	61.0485	72.814	0.0413176	0.589215	up	--	--
gene_Bol018376	4.25397	9.31542	5.78463	11.6913	19.5887	13.7875	0.00111282	1.28981	up	K03676|2.9e-23|hbr:110652949|K03676 glutaredoxin 3 | (RefSeq) glutaredoxin-C9-like	--
gene_Bol029020	28.3772	28.13	35.9668	18.8476	19.5814	16.4749	0.000503919	-0.653001	down	K02938|2.9e-148|bna:106447022|K02938 large subunit ribosomal protein L8e | (RefSeq) 60S ribosomal protein L8-3-like	Ribosome (ko03010)
gene_Bol028336	2315.5	2289.43	2189.82	3480.06	2485.08	3566.53	0.0122294	0.608089	up	--	--
gene_Bol015376	14.4064	19.3004	45.2916	5.80293	8.14166	4.82171	5.97e-06	-1.98432	down	K03844|3.7e-33|mng:MNEG_1379|K03844 alpha-1,2-mannosyltransferase [EC:2.4.1.131] | (RefSeq) alpha-1,2-mannosyltransferase	N-Glycan biosynthesis (ko00510);; Various types of N-glycan biosynthesis (ko00513)
gene_Bol032052	1.96785	1.83754	1.41805	2.79892	4.70135	1.61437	0.018134	0.856819	up	K16225|0.0e+00|csat:104771734|K16225 probable WRKY transcription factor 52 | (RefSeq) LOW QUALITY PROTEIN: disease resistance protein RRS1-like	Plant-pathogen interaction (ko04626)
gene_Bol015835	37.4698	20.0832	5.16161	54.7567	37.158	65.2536	0.0140074	1.45135	up	K00430|1.9e-189|bna:106380265|K00430 peroxidase [EC:1.11.1.7] | (RefSeq) peroxidase 69-like	Phenylpropanoid biosynthesis (ko00940)
gene_Bol017631	22.7896	13.1009	9.7485	26.2765	24.7134	27.0877	0.0117919	0.882257	up	--	--
gene_Bol033326	4.21202	4.37424	4.33958	1.2967	2.85908	1.86117	0.00722061	-1.0219	down	K00645|1.9e-145|bna:106411252|K00645 [acyl-carrier-protein] S-malonyltransferase [EC:2.3.1.39] | (RefSeq) uncharacterized protein LOC106411252	Fatty acid biosynthesis (ko00061);; Fatty acid metabolism (ko01212)
gene_Bol023768	1.97808	1.1315	2.734	0.831103	0.954533	0.783509	0.00894903	-1.07242	down	K17839|2.3e-284|boe:106296723|K17839 polyamine oxidase [EC:1.5.3.17 1.5.3.-] | (RefSeq) polyamine oxidase 3	Arginine and proline metabolism (ko00330);; beta-Alanine metabolism (ko00410);; Pantothenate and CoA biosynthesis (ko00770)
gene_Bol033849	8.35005	8.49931	17.1416	4.48191	4.93335	1.90201	0.00945281	-1.47436	down	--	--
gene_Bol017906	1.12328	0.712728	0.957772	1.21016	1.71711	2.54215	0.037786	1.07813	up	K03097|4.2e-12|aip:107623262|K03097 casein kinase II subunit alpha [EC:2.7.11.1] | (RefSeq) casein kinase II subunit alpha-like isoform X2	Ribosome biogenesis in eukaryotes (ko03008);; Circadian rhythm - plant (ko04712)
gene_Bol006514	67.9147	71.8681	85.2716	36.3559	62.1737	27.2405	0.00690785	-0.773816	down	K02957|1.7e-69|aly:9300731|K02957 small subunit ribosomal protein S15Ae | (RefSeq) 40S ribosomal protein S15a-1	Ribosome (ko03010)
gene_Bol031495	18.1228	16.2144	10.6801	29.6141	22.7504	35.4629	0.0010067	1.08469	up	K15275|1.1e-192|bna:106369155|K15275 solute carrier family 35 (UDP-galactose transporter), member B1 | (RefSeq) UDP-galactose/UDP-glucose transporter 3	--
gene_Bol005583	4.65993	4.07729	7.37393	2.19301	4.1592	2.08689	0.0109682	-0.857247	down	K05658|0.0e+00|boe:106334658|K05658 ATP-binding cassette, subfamily B (MDR/TAP), member 1 [EC:7.6.2.2] | (RefSeq) ABC transporter B family member 1	ABC transporters (ko02010)
gene_Bol028149	5.96653	5.43056	10.5652	3.10462	4.85235	3.16644	0.0343253	-0.890468	down	K16285|3.6e-85|bna:106405849|K16285 RING/U-box domain-containing protein [EC:2.3.2.27] | (RefSeq) probable E3 ubiquitin-protein ligase XERICO	--
gene_Bol012569	6.66096	7.6955	8.12586	1.1219	4.7148	1.32017	0.00726831	-1.58418	down	K12373|3.9e-58|bna:111197814|K12373 hexosaminidase [EC:3.2.1.52] | (RefSeq) beta-hexosaminidase 3	Other glycan degradation (ko00511);; Various types of N-glycan biosynthesis (ko00513);; Amino sugar and nucleotide sugar metabolism (ko00520);; Glycosaminoglycan degradation (ko00531);; Glycosphingolipid biosynthesis - globo and isoglobo series (ko00603);; Glycosphingolipid biosynthesis - ganglio series (ko00604)
Brassica_oleracea_newGene_9861	12.5474	12.6265	11.6237	4.77935	3.28021	7.19084	0.00193503	-1.14277	down	--	--
gene_Bol039132	31.0305	30.6178	51.2489	24.5904	23.4616	19.3215	0.0191208	-0.645172	down	K09286|9.0e-93|bna:106454908|K09286 EREBP-like factor | (RefSeq) ethylene-responsive transcription factor 4	--
gene_Bol043286	62.0749	93.24	51.8162	106.013	92.6842	130.808	0.0134917	0.781864	up	--	--
gene_Bol030083	2.47547	14.6477	6.40174	2.76806	1.3238	4.09921	0.0451846	-1.38533	down	--	--
gene_Bol036767	7.72477	6.67939	7.99034	3.61036	5.77062	3.61651	0.00779042	-0.703304	down	K18878|1.9e-30|cann:107866053|K18878 BHLH transcription factor Upa20 | (RefSeq) Upa20; transcription factor bHLH137-like	Plant-pathogen interaction (ko04626)
gene_Bol018467	1.96532	4.63868	3.42399	1.19216	1.84568	0.833347	0.00583604	-1.30091	down	K01180|7.4e-75|cmax:111487562|K01180 endo-1,3(4)-beta-glucanase [EC:3.2.1.6] | (RefSeq) uncharacterized protein LOC111487562	--
gene_Bol041031	10.1256	10.094	17.0445	6.68066	7.62905	7.06731	0.0107215	-0.697013	down	K21842|0.0e+00|bna:106401862|K21842 protein EFR3 | (RefSeq) uncharacterized protein LOC106401862	--
gene_Bol035128	155.265	140.493	143.057	165.002	244.205	209.508	0.00132776	0.590128	up	K17725|2.0e-158|boe:106331433|K17725 sulfur dioxygenase [EC:1.13.11.18] | (RefSeq) persulfide dioxygenase ETHE1 homolog, mitochondrial	Sulfur metabolism (ko00920)
gene_Bol033225	349.792	292.515	234.914	381.835	592.74	439.135	0.000810842	0.774076	up	--	--
gene_Bol032978	2.87774	2.11841	1.41644	2.95278	3.54723	4.39003	0.0195751	0.872693	up	K02184|6.9e-73|sind:105170502|K02184 formin 2 | (RefSeq) formin-like protein 1	--
gene_Bol023929	1.099	1.66033	0.677166	1.7292	10.7163	1.2699	0.0102901	1.97246	up	K05391|3.0e-12|pavi:110751042|K05391 cyclic nucleotide gated channel, plant | (RefSeq) cyclic nucleotide-gated ion channel 1-like	Plant-pathogen interaction (ko04626)
Brassica_oleracea_newGene_9390	11.2289	48.5999	23.622	89.9585	93.6266	57.0718	0.00106736	1.49578	up	K07277|8.2e-09|bna:111198355|K07277 outer membrane protein insertion porin family | (RefSeq) uncharacterized protein LOC111198355	--
gene_Bol011189	7.23747	6.73288	8.13571	4.7116	6.2718	2.83411	0.0322316	-0.603796	down	K23280|7.2e-56|peq:110031710|K23280 rhamnogalacturonan I rhamnosyltransferase [EC:2.4.1.351] | (RefSeq) uncharacterized protein At1g04910-like	--
gene_Bol020937	9.79863	8.48934	8.41353	13.3984	13.8144	15.6788	0.000215914	0.792614	up	--	--
gene_Bol023203	1.99172	1.04351	3.37734	0.795458	0.956843	0.587288	0.0157718	-1.33763	down	K21777|1.0e-224|bna:106422810|K21777 G2/mitotic-specific cyclin-B, other | (RefSeq) cyclin-B1-3-like	--
Brassica_oleracea_newGene_10304	0.36593	0.170144	0	1.21974	0.984667	2.16787	0.00199992	3.125	up	--	--
gene_Bol020573	53.3067	69.25	39.0086	83.8106	63.4959	91.4626	0.0347912	0.677413	up	K02183|1.1e-70|pda:103722132|K02183 calmodulin | (RefSeq) calmodulin-7-like	MAPK signaling pathway - plant (ko04016);; Phosphatidylinositol signaling system (ko04070);; Plant-pathogen interaction (ko04626)
gene_Bol008286	3.4211	2.55069	4.92734	2.16505	1.78497	1.08331	0.0289273	-1.01874	down	K14502|1.3e-134|boe:106342948|K14502 protein brassinosteroid insensitive 2 [EC:2.7.11.1] | (RefSeq) shaggy-related protein kinase zeta-like	Plant hormone signal transduction (ko04075)
Brassica_oleracea_newGene_2178	12.1497	34.1717	47.987	13.1493	5.41799	10.0313	0.00256324	-1.59007	down	K01183|2.1e-154|bna:111205097|K01183 chitinase [EC:3.2.1.14] | (RefSeq) endochitinase At2g43590-like	Amino sugar and nucleotide sugar metabolism (ko00520)
gene_Bol010164	28.6327	30.3055	59.084	16.2243	33.0783	12.0105	0.03435	-0.881644	down	K03671|3.8e-38|peq:110017948|K03671 thioredoxin 1 | (RefSeq) thioredoxin X, chloroplastic	--
gene_Bol028922	1.4699	1.05697	0.804871	2.9233	2.75204	2.59146	5.29e-05	1.4118	up	K13260|2.8e-186|bna:106391411|K13260 isoflavone/4'-methoxyisoflavone 2'-hydroxylase [EC:1.14.14.90 1.14.14.89] | (RefSeq) cytochrome P450 81D11-like	Isoflavonoid biosynthesis (ko00943)
Brassica_oleracea_newGene_7144	1.2928	1.08708	0.735176	0.483146	0.378624	0.511861	0.0304492	-1.05112	down	K03006|3.1e-48|adu:107466525|K03006 DNA-directed RNA polymerase II subunit RPB1 [EC:2.7.7.6] | (RefSeq) LOW QUALITY PROTEIN: DNA-directed RNA polymerase II subunit 1-like	RNA polymerase (ko03020)
gene_Bol021678	2.00976	1.81902	0.799661	3.06719	3.26542	2.92575	0.0162084	1.08087	up	K10666|9.3e-12|boe:106336610|K10666 E3 ubiquitin-protein ligase RNF5 [EC:2.3.2.27] | (RefSeq) uncharacterized protein LOC106336610	Protein processing in endoplasmic reticulum (ko04141)
gene_Bol030184	16.1693	16.4146	15.9422	4.25536	4.58579	3.61469	4.81e-09	-1.85242	down	--	--
gene_Bol004742	13.3619	14.1154	20.1856	8.12005	13.5237	7.50939	0.0416085	-0.631983	down	K02881|2.0e-98|boe:106343243|K02881 large subunit ribosomal protein L18 | (RefSeq) 50S ribosomal protein L18	Ribosome (ko03010)
gene_Bol009125	4.94097	6.39361	3.52392	8.23005	10.1451	6.17931	0.0404586	0.792911	up	--	--
gene_Bol038955	12.5279	9.28469	9.57288	13.1868	14.9162	19.5775	0.00988253	0.719377	up	K02132|1.9e-273|bna:111205202|K02132 F-type H+-transporting ATPase subunit alpha | (RefSeq) uncharacterized protein LOC111205202	Oxidative phosphorylation (ko00190)
gene_Bol013804	1.27251	1.40073	3.27791	0.564483	1.07031	0.425131	0.0118044	-1.4428	down	K13356|1.4e-284|bna:106403161|K13356 alcohol-forming fatty acyl-CoA reductase [EC:1.2.1.84] | (RefSeq) probable fatty acyl-CoA reductase 4	Cutin, suberine and wax biosynthesis (ko00073);; Peroxisome (ko04146)
gene_Bol039107	23.7092	18.2872	17.7899	28.6194	35.1144	32.0965	6.56e-05	0.779741	up	K04371|0.0e+00|bna:106451480|K04371 mitogen-activated protein kinase 1/3 [EC:2.7.11.24] | (RefSeq) mitogen-activated protein kinase 18	--
gene_Bol023085	1.81337	2.15697	1.71261	1.8641	9.61988	3.38314	0.00836456	1.42293	up	K07195|0.0e+00|bna:106427883|K07195 exocyst complex component 7 | (RefSeq) exocyst complex component EXO70H1-like	--
gene_Bol021505	4.8232	4.88452	5.72433	3.13151	1.80209	3.32655	0.0375041	-0.768302	down	K00134|4.0e-217|boe:106296770|K00134 glyceraldehyde 3-phosphate dehydrogenase [EC:1.2.1.12] | (RefSeq) glyceraldehyde-3-phosphate dehydrogenase GAPCP1, chloroplastic	Glycolysis / Gluconeogenesis (ko00010);; Carbon fixation in photosynthetic organisms (ko00710);; Carbon metabolism (ko01200);; Biosynthesis of amino acids (ko01230)
gene_Bol034704	7.41214	4.24092	6.198	1.66115	0.717344	3.46631	0.0359876	-1.44427	down	--	--
gene_Bol036532	12.591	12.3369	20.0257	9.22485	6.40609	8.33578	0.0146846	-0.786176	down	--	--
Brassica_oleracea_newGene_4836	2.98921	3.14813	4.16524	1.56935	2.65979	1.30933	0.0242902	-0.810675	down	K01322|3.1e-11|csat:104767606|K01322 prolyl oligopeptidase [EC:3.4.21.26] | (RefSeq) putative F-box/LRR-repeat protein At3g18150	--
gene_Bol045699	0.205933	0.252189	0.119472	0.938534	0.554221	1.42338	0.000450653	2.38532	up	K09527|3.3e-24|lja:Lj3g3v3579380.1|K09527 DnaJ homolog subfamily C member 7 | (RefSeq) Lj3g3v3579380.1; -	--
gene_Bol038953	69.6316	44.7997	150.993	35.1939	23.8796	56.6908	0.0420321	-1.04345	down	--	--
gene_Bol039912	8.14587	7.64006	9.56683	4.11902	5.99168	5.59035	0.0247903	-0.592841	down	K14503|9.1e-163|bna:106387257|K14503 brassinosteroid resistant 1/2 | (RefSeq) protein BRASSINAZOLE-RESISTANT 1-like	Plant hormone signal transduction (ko04075)
gene_Bol005783	8.25836	7.78137	17.1573	6.63175	4.73224	4.91712	0.0190317	-0.912489	down	K13430|1.2e-78|mus:103988644|K13430 serine/threonine-protein kinase PBS1 [EC:2.7.11.1] | (RefSeq) serine/threonine-protein kinase CDL1-like	Plant-pathogen interaction (ko04626)
gene_Bol020384	7.58962	3.14655	2.80849	3.08298	30.4821	6.66514	0.0476098	1.57557	up	--	--
gene_Bol008391	5.65176	3.99525	2.27133	9.2031	9.12224	8.22673	0.00142124	1.25366	up	K08500|6.7e-131|bna:106389637|K08500 syntaxin of plants SYP6 | (RefSeq) syntaxin-61-like	SNARE interactions in vesicular transport (ko04130)
gene_Bol023788	22.8493	20.0158	16.4154	25.4883	32.0808	33.2297	0.00228249	0.717288	up	K13436|4.6e-208|brp:103830211|K13436 pto-interacting protein 1 [EC:2.7.11.1] | (RefSeq) PTI1-like tyrosine-protein kinase 3 isoform X1	Plant-pathogen interaction (ko04626)
gene_Bol004917	48.0257	36.8964	28.129	70.4184	44.7219	49.2593	0.0343493	0.649441	up	K12893|5.2e-115|bna:106415422|K12893 splicing factor, arginine/serine-rich 4/5/6 | (RefSeq) serine/arginine-rich splicing factor RS31-like	Spliceosome (ko03040)
gene_Bol036965	0.274576	0.758145	0.731021	0.177214	0.297087	0.110958	0.00916469	-1.52045	down	K09489|6.5e-07|lsv:111902331|K09489 heat shock 70kDa protein 4 | (RefSeq) heat shock 70 kDa protein 15-like	--
gene_Bol025903	2.24301	1.39175	0.817376	0.282671	0.476487	0.339625	0.000916509	-1.89625	down	K05909|0.0e+00|boe:106329429|K05909 laccase [EC:1.10.3.2] | (RefSeq) laccase-17	--
gene_Bol036237	2.51304	2.19156	2.62246	7.26327	1.09827	9.35174	0.0398566	1.43752	up	K14493|2.8e-63|nau:109216467|K14493 gibberellin receptor GID1 [EC:3.-.-.-] | (RefSeq) gibberellin receptor GID1C-like	Plant hormone signal transduction (ko04075)
gene_Bol035623	2.92569	3.09871	4.33544	0.939759	2.58752	1.1383	0.0194403	-1.07976	down	--	--
gene_Bol037233	5.53382	5.81845	5.82618	2.41244	3.55218	2.99659	0.00114685	-0.847261	down	K09838|1.2e-12|mpp:MICPUCDRAFT_19991|K09838 zeaxanthin epoxidase [EC:1.14.15.21] | (RefSeq) ZEP1; zeaxanthin epoxidase	Carotenoid biosynthesis (ko00906)
Brassica_oleracea_newGene_4253	2.70198	4.20413	4.56328	15.9349	5.29173	7.01181	0.00209116	1.41023	up	K07374|1.3e-08|bna:106369784|K07374 tubulin alpha | (RefSeq) tubulin alpha-1 chain-like	Phagosome (ko04145)
gene_Bol036806	3.60772	9.15757	9.98076	1.327	0	2.932	0.0430984	-2.20338	down	--	--
gene_Bol041900	0.709027	0.856663	1.61841	0.660641	12.6857	1.2973	0.0189653	2.17585	up	K00679|3.0e-50|cic:CICLE_v10027727mg|K00679 phospholipid:diacylglycerol acyltransferase [EC:2.3.1.158] | (RefSeq) hypothetical protein	Glycerolipid metabolism (ko00561)
gene_Bol041247	91.5281	78.0953	43.7459	102.483	130.197	118.188	0.00733975	0.81167	up	--	--
gene_Bol027692	14.7225	12.3218	18.2682	8.08978	9.17655	7.72827	0.000121142	-0.7581	down	K00924|9.4e-264|boe:106300159|K00924 kinase [EC:2.7.1.-] | (RefSeq) receptor protein kinase CLAVATA1	--
gene_Bol014964	6.90306	3.22769	5.66398	3.60638	2.6218	2.24263	0.0479283	-0.787244	down	K24104|3.7e-08|thj:104799061|K24104 GPN-loop GTPase | (RefSeq) LOW QUALITY PROTEIN: uncharacterized protein LOC104799061	--
gene_Bol015543	39.198	34.7122	25.036	60.798	34.5511	49.1192	0.0348532	0.663496	up	K08867|0.0e+00|bna:106388190|K08867 WNK lysine deficient protein kinase [EC:2.7.11.1] | (RefSeq) probable serine/threonine-protein kinase WNK4 isoform X1	--
gene_Bol029488	5.39395	4.14175	3.69043	2.99608	2.78259	2.32449	0.0477707	-0.601141	down	K08333|1.1e-53|apro:F751_2108|K08333 phosphoinositide-3-kinase, regulatory subunit 4 [EC:2.7.11.1] | (RefSeq) putative serine/threonine-protein kinase vps15	Autophagy - other (ko04136)
gene_Bol030394	0.703425	0.757261	0.899329	1.37594	5.83391	1.5643	0.00150021	1.91664	up	K01184|2.8e-260|boe:106313005|K01184 polygalacturonase [EC:3.2.1.15] | (RefSeq) polygalacturonase At1g48100	Pentose and glucuronate interconversions (ko00040)
gene_Bol025273	17.4719	19.8123	25.0567	13.5507	12.9719	8.30074	0.00203516	-0.751873	down	K12349|0.0e+00|bna:106406144|K12349 neutral ceramidase [EC:3.5.1.23] | (RefSeq) neutral ceramidase 2	Sphingolipid metabolism (ko00600)
gene_Bol036987	31.6152	92.5724	48.9187	12.0472	37.6296	3.62186	0.0123791	-1.69992	down	K07555|2.2e-49|brp:103865313|K07555 ATP synthase mitochondrial F1 complex assembly factor 1 | (RefSeq) ATP synthase mitochondrial F1 complex assembly factor 1	--
gene_Bol004959	3.19619	1.75209	3.09773	0.622158	0.772038	0.902574	0.00114752	-1.68797	down	K09264|6.6e-134|bna:106414128|K09264 MADS-box transcription factor, plant | (RefSeq) agamous-like MADS-box protein AGL1	--
gene_Bol020597	1.29713	1.66691	1.28951	0.773651	0.574218	0.290728	0.0335059	-1.24122	down	K16225|7.0e-13|csat:104760397|K16225 probable WRKY transcription factor 52 | (RefSeq) disease resistance protein RRS1-like	Plant-pathogen interaction (ko04626)
gene_Bol012403	7.14507	7.59685	8.1983	11.4937	12.0909	9.34237	0.00214039	0.611096	up	K14318|5.2e-09|qsu:112031792|K14318 nuclear pore complex protein Nup88 | (RefSeq) nuclear pore complex protein NUP88-like isoform X1	RNA transport (ko03013)
gene_Bol030097	0.635674	0.486026	0.170353	2.24808	2.80357	1.9824	2.36e-06	2.4883	up	K01179|8.0e-293|bna:106395508|K01179 endoglucanase [EC:3.2.1.4] | (RefSeq) endoglucanase 12	Starch and sucrose metabolism (ko00500)
gene_Bol012706	21.8707	13.3389	27.2423	7.63909	17.325	5.39713	0.0221087	-0.98394	down	K01534|4.4e-42|mpp:MICPUCDRAFT_47831|K01534 Zn2+/Cd2+-exporting ATPase [EC:7.2.2.12 7.2.2.21] | (RefSeq) p-type ATPase superfamily	--
Brassica_oleracea_newGene_3845	0.618784	1.18067	0.723162	0.449897	0.037647	0.092785	0.028862	-1.99023	down	K23814|2.0e-200|bna:106420879|K23814 cytochrome P450 family 705 subfamily A [EC:1.14.-.-] | (RefSeq) cytochrome P450 705A22-like	--
gene_Bol027952	0.66003	1.44189	1.42409	10.6904	1.94575	2.77361	0.000843469	2.24091	up	K14487|0.0e+00|bna:106346022|K14487 auxin responsive GH3 gene family | (RefSeq) indole-3-acetic acid-amido synthetase GH3.6-like	Plant hormone signal transduction (ko04075)
gene_Bol043644	2.47944	2.58413	1.5553	3.57112	5.86244	2.42908	0.0235793	0.899509	up	K13260|3.0e-117|zju:107424876|K13260 isoflavone/4'-methoxyisoflavone 2'-hydroxylase [EC:1.14.14.90 1.14.14.89] | (RefSeq) cytochrome P450 81E8-like	Isoflavonoid biosynthesis (ko00943)
gene_Bol038004	30.5625	22.3876	16.3577	30.4487	32.8839	36.8633	0.023013	0.639403	up	K13430|1.2e-88|nta:107785708|K13430 serine/threonine-protein kinase PBS1 [EC:2.7.11.1] | (RefSeq) serine/threonine-protein kinase PBS1-like	Plant-pathogen interaction (ko04626)
Brassica_oleracea_newGene_669	0	0	0	2.06461	5.86733	2.1433	4.41e-09	8.274	up	K15296|8.6e-44|bna:106402208|K15296 alpha-soluble NSF attachment protein | (RefSeq) alpha-soluble NSF attachment protein 2-like	--
gene_Bol007681	2.51951	1.83024	1.60206	3.38291	5.70718	2.11317	0.0130645	0.971947	up	K13146|0.0e+00|bna:106400697|K13146 integrator complex subunit 9 | (RefSeq) integrator complex subunit 9-like isoform X1	--
gene_Bol035133	3.98482	2.01871	0.541421	3.02843	9.9116	5.34419	0.0417023	1.53322	up	--	--
gene_Bol027434	10.0906	8.20111	12.1799	5.25134	7.57125	5.60918	0.00687117	-0.632248	down	--	--
gene_Bol031277	3.72594	3.03459	4.15374	1.52825	1.10892	1.35454	0.000243867	-1.33155	down	--	--
gene_Bol032644	4.28035	4.45175	5.19163	6.74547	7.74241	10.4398	0.0112689	0.959012	up	--	--
gene_Bol039093	1.19603	1.56702	2.14213	0.900301	0.933013	0.653523	0.0235707	-0.874443	down	K13430|7.0e-64|mus:103988644|K13430 serine/threonine-protein kinase PBS1 [EC:2.7.11.1] | (RefSeq) serine/threonine-protein kinase CDL1-like	Plant-pathogen interaction (ko04626)
Brassica_oleracea_newGene_7200	1.01485	1.30183	0.938181	3.5961	1.70811	2.74955	0.00426032	1.39867	up	K24104|5.4e-43|thj:104799061|K24104 GPN-loop GTPase | (RefSeq) LOW QUALITY PROTEIN: uncharacterized protein LOC104799061	--
gene_Bol024918	13.6556	10.9763	10.6838	16.6005	12.9174	20.411	0.0322536	0.62411	up	--	--
gene_Bol030270	8.39364	8.8831	7.6092	3.41578	4.95737	4.5029	0.00317691	-0.850215	down	--	--
Brassica_oleracea_newGene_79	1.02508	1.76739	1.87144	6.55751	4.04037	0.976047	0.0346669	1.36752	up	K07466|2.0e-47|boe:106336275|K07466 replication factor A1 | (RefSeq) uncharacterized protein LOC106336275	DNA replication (ko03030);; Nucleotide excision repair (ko03420);; Mismatch repair (ko03430);; Homologous recombination (ko03440)
gene_Bol039171	4.65077	2.11793	17.6486	2.65886	3.92288	1.36286	0.0276937	-1.54231	down	--	--
gene_Bol038577	2.64236	2.325	3.72248	0.133815	0.506717	0	2.2e-05	-3.67576	down	K09874|7.3e-159|boe:106298297|K09874 aquaporin NIP | (RefSeq) aquaporin NIP6-1	--
gene_Bol038918	8.66792	9.12381	8.87946	5.38506	4.46558	5.51742	0.00358605	-0.683555	down	K01568|0.0e+00|bna:106411347|K01568 pyruvate decarboxylase [EC:4.1.1.1] | (RefSeq) pyruvate decarboxylase 2	Glycolysis / Gluconeogenesis (ko00010)
gene_Bol015846	20.2139	30.7922	84.6963	18.3628	12.5874	22.8755	0.0219766	-1.19297	down	K23948|2.8e-23|qsu:112000882|K23948 NADH:quinone reductase (non-electrogenic) [EC:1.6.5.9] | (RefSeq) uncharacterized protein LOC112000882	--
gene_Bol015135	6.80869	6.75012	5.62054	9.95585	8.39201	11.4576	0.00423783	0.750331	up	K13418|6.4e-49|ppp:112278174|K13418 somatic embryogenesis receptor kinase 1 [EC:2.7.10.1 2.7.11.1] | (RefSeq) LRR receptor kinase BAK1-like	--
gene_Bol029150	2.80779	3.11241	3.22381	6.33312	3.65132	5.03816	0.0137399	0.83031	up	K20559|2.8e-200|crb:17884730|K20559 dihydrocamalexate/camalexin synthase [EC:1.14.19.52] | (RefSeq) bifunctional dihydrocamalexate synthase/camalexin synthase	MAPK signaling pathway - plant (ko04016)
gene_Bol010264	4.37835	5.02279	10.7792	2.52685	3.64554	3.05979	0.0448171	-1.01563	down	K14488|8.2e-67|bna:106389840|K14488 SAUR family protein | (RefSeq) auxin-responsive protein SAUR72	Plant hormone signal transduction (ko04075)
gene_Bol014413	35.2033	27.186	27.3038	30.2493	47.0399	48.12	0.0247032	0.587253	up	K09517|7.2e-179|bna:106444974|K09517 DnaJ homolog subfamily B member 11 | (RefSeq) dnaJ protein ERDJ3B	Protein processing in endoplasmic reticulum (ko04141)
gene_Bol014949	0.658726	1.00417	0.832425	3.39493	2.42546	2.24671	1.11e-05	1.78595	up	K24104|2.9e-07|thj:104799061|K24104 GPN-loop GTPase | (RefSeq) LOW QUALITY PROTEIN: uncharacterized protein LOC104799061	--
Brassica_oleracea_newGene_5022	10.7429	16.9081	15.8919	7.92552	7.56024	6.12845	0.00346483	-0.913996	down	K02923|3.8e-31|aly:9314345|K02923 large subunit ribosomal protein L38e | (RefSeq) 60S ribosomal protein L38	Ribosome (ko03010)
gene_Bol011167	22.1124	25.0736	15.9759	35.4226	24.2698	31.3581	0.0307681	0.638743	up	K00521|7.2e-41|cmos:111447866|K00521 ferric-chelate reductase [EC:1.16.1.7] | (RefSeq) ferric reduction oxidase 7, chloroplastic-like	--
gene_Bol029091	17.8852	23.333	7.67629	38.1943	45.1214	27.6063	0.00157306	1.25362	up	--	--
gene_Bol013673	3.72467	2.96757	4.24601	4.57014	8.6852	5.01259	0.00928845	0.817225	up	K01180|4.0e-73|cmax:111487562|K01180 endo-1,3(4)-beta-glucanase [EC:3.2.1.6] | (RefSeq) uncharacterized protein LOC111487562	--
gene_Bol025622	3.3073	2.08875	3.19345	1.46941	2.09761	0.983099	0.0176413	-0.83264	down	K08734|0.0e+00|bna:106435650|K08734 DNA mismatch repair protein MLH1 | (RefSeq) DNA mismatch repair protein MLH1	Mismatch repair (ko03430)
gene_Bol026347	35.3244	37.8939	43.9999	25.8753	23.1381	18.5532	0.00048389	-0.697587	down	K02998|1.9e-164|bna:106406427|K02998 small subunit ribosomal protein SAe | (RefSeq) 40S ribosomal protein SA-like	Ribosome (ko03010)
Brassica_oleracea_newGene_964	25.7439	15.8357	19.7518	9.47556	17.1828	11.5086	0.0300282	-0.597959	down	--	--
gene_Bol009869	9.36583	7.39699	9.16468	14.7506	14.8687	11.0218	0.000392235	0.742905	up	--	--
gene_Bol029614	7.18083	6.44152	3.88434	9.4136	8.66734	8.53274	0.0198154	0.701979	up	K01897|0.0e+00|boe:106329307|K01897 long-chain acyl-CoA synthetase [EC:6.2.1.3] | (RefSeq) long chain acyl-CoA synthetase 1 isoform X1	Fatty acid biosynthesis (ko00061);; Fatty acid degradation (ko00071);; Fatty acid metabolism (ko01212);; Peroxisome (ko04146)
gene_Bol007596	10.9249	9.69236	11.25	6.25468	4.42144	5.89434	0.00201739	-0.822861	down	K01939|1.4e-284|boe:106296482|K01939 adenylosuccinate synthase [EC:6.3.4.4] | (RefSeq) adenylosuccinate synthetase, chloroplastic-like	Purine metabolism (ko00230);; Alanine, aspartate and glutamate metabolism (ko00250)
gene_Bol022847	8.1589	1.28946	5.49286	0.746562	1.78491	1.22825	0.00197229	-1.88548	down	K01728|3.7e-35|zju:107419134|K01728 pectate lyase [EC:4.2.2.2] | (RefSeq) pectate lyase 1-like	Pentose and glucuronate interconversions (ko00040)
gene_Bol021224	2.87525	14.7583	22.2279	55.0386	105.582	17.9032	0.00194149	2.19139	up	K03860|5.0e-22|nnu:104608881|K03860 phosphatidylinositol N-acetylglucosaminyltransferase subunit Q | (RefSeq) N-acetylglucosaminyl-phosphatidylinositol biosynthetic protein gpi1-like	Glycosylphosphatidylinositol (GPI)-anchor biosynthesis (ko00563)
gene_Bol009576	27.1639	31.8561	57.4179	15.9594	21.0936	14.5912	0.000435535	-1.08226	down	K15363|2.7e-49|bna:111210893|K15363 fanconi-associated nuclease 1 [EC:3.1.21.- 3.1.4.1] | (RefSeq) fanconi-associated nuclease 1 homolog	--
gene_Bol012792	36.0605	44.1176	34.9388	40.2001	74.0938	54.6378	0.0202736	0.634961	up	K08238|2.5e-07|brp:103847104|K08238 xyloglucan 6-xylosyltransferase [EC:2.4.2.39] | (RefSeq) probable xyloglucan 6-xylosyltransferase 3	--
Brassica_oleracea_newGene_264	1.03313	1.12852	1.09526	1.09969	2.28753	2.15571	0.0152034	0.861978	up	K22804|6.8e-151|bna:106442438|K22804 structural maintenance of chromosomes protein 6 | (RefSeq) structural maintenance of chromosomes protein 6B-like	--
gene_Bol015616	1.39569	1.37008	1.71082	0.453478	0.897332	0.839143	0.0300518	-0.917239	down	K13172|4.8e-45|cmos:111450450|K13172 serine/arginine repetitive matrix protein 2 | (RefSeq) uncharacterized protein LOC111450450 isoform X1	--
gene_Bol015712	24.9574	31.0824	27.6813	34.5868	40.4121	42.2875	0.00620831	0.588655	up	--	--
gene_Bol030353	4.34724	6.29849	3.56198	8.04613	7.73909	6.44697	0.047743	0.734232	up	K09338|4.7e-56|brp:103838097|K09338 homeobox-leucine zipper protein | (RefSeq) LOW QUALITY PROTEIN: homeobox-leucine zipper protein HAT7	--
gene_Bol013649	0.78596	0.849777	1.45485	0.466972	0.359666	0.293738	0.00478829	-1.33666	down	K15923|0.0e+00|boe:106308629|K15923 alpha-L-fucosidase 2 [EC:3.2.1.51] | (RefSeq) alpha-L-fucosidase 2	Other glycan degradation (ko00511)
gene_Bol017221	3.12865	2.86169	3.3529	4.96889	5.09151	5.10879	0.00203258	0.798732	up	--	--
gene_Bol028144	8.77493	6.58215	9.53512	3.13333	6.98984	4.37542	0.0418222	-0.698112	down	--	--
gene_Bol024935	0.773504	1.2748	0.209272	2.44119	6.34345	1.65689	0.00382029	2.18918	up	K20352|1.5e-118|boe:106332465|K20352 p24 family protein delta-1 | (RefSeq) transmembrane emp24 domain-containing protein p24delta9-like	--
gene_Bol018045	6.05936	7.88578	12.7856	3.61789	5.82964	3.58768	0.0244266	-0.942747	down	--	--
gene_Bol036297	190.79	160.104	147.113	280.264	163.215	370.005	0.0172164	0.847119	up	K08054|2.6e-236|bna:106451927|K08054 calnexin | (RefSeq) calnexin homolog 1	Protein processing in endoplasmic reticulum (ko04141);; Phagosome (ko04145)
gene_Bol018925	3.10883	3.57793	3.79434	1.58613	2.45375	1.08082	0.0120947	-0.961296	down	K13199|7.1e-139|bna:106418410|K13199 plasminogen activator inhibitor 1 RNA-binding protein | (RefSeq) RGG repeats nuclear RNA binding protein C-like	--
gene_Bol012530	3.02954	5.51968	0.267366	5.58011	11.9334	12.112	0.033387	1.8208	up	K14509|5.1e-63|bna:106396643|K14509 ethylene receptor [EC:2.7.13.-] | (RefSeq) ethylene receptor 1	MAPK signaling pathway - plant (ko04016);; Plant hormone signal transduction (ko04075)
gene_Bol005752	14.4849	7.3991	10.1886	7.45802	4.338	3.6825	0.0441911	-0.933855	down	K02961|4.7e-31|bna:106423785|K02961 small subunit ribosomal protein S17 | (RefSeq) uncharacterized protein LOC106423785	Ribosome (ko03010)
gene_Bol019716	4.61326	6.73109	7.17252	3.51057	4.21571	3.77355	0.040917	-0.590263	down	K12493|5.4e-202|boe:106313884|K12493 ADP-ribosylation factor GTPase-activating protein 2/3 | (RefSeq) probable ADP-ribosylation factor GTPase-activating protein AGD8	Endocytosis (ko04144)
gene_Bol009341	13.7117	17.4035	14.261	21.4633	31.9995	15.2514	0.0242955	0.662794	up	--	--
gene_Bol008617	8.08139	10.1434	10.1006	4.98535	7.88195	4.70041	0.0163896	-0.610809	down	K13421|5.8e-264|bna:106406975|K13421 uridine monophosphate synthetase [EC:2.4.2.10 4.1.1.23] | (RefSeq) uridine 5'-monophosphate synthase	Pyrimidine metabolism (ko00240)
gene_Bol006107	14.0688	16.7727	7.94443	22.6589	25.0072	24.5711	0.00186649	0.99131	up	K13207|1.8e-237|boe:106319031|K13207 CUG-BP- and ETR3-like factor | (RefSeq) RNA-binding protein BRN1	--
gene_Bol026123	2.60204	2.61908	2.23159	1.17535	1.51977	1.01181	0.0133865	-0.909721	down	K01206|1.9e-168|boe:106299976|K01206 alpha-L-fucosidase [EC:3.2.1.51] | (RefSeq) alpha-L-fucosidase 3	Other glycan degradation (ko00511)
gene_Bol021865	6.86032	9.56877	6.45653	11.1704	11.7406	11.0054	0.0402157	0.657781	up	--	--
gene_Bol014387	7.90646	6.93411	2.9117	40.5999	12.6492	40.2386	1.58e-05	2.52935	up	--	--
gene_Bol030010	161.452	219.394	286.396	62.0795	167.78	76.4883	0.00421744	-1.0626	down	--	--
gene_Bol031530	51.9335	43.3809	42.5545	64.4216	55.5486	80.9334	0.012986	0.664	up	--	--
gene_Bol005516	1.87648	1.91385	1.48002	2.23351	2.78843	3.18412	0.0181569	0.740662	up	K23280|6.0e-111|dosa:Os03t0328100-01|K23280 rhamnogalacturonan I rhamnosyltransferase [EC:2.4.1.351] | (RefSeq) Os03g0328100; Similar to Axi 1 (Auxin-independent growth promoter)-like protein.	--
gene_Bol029986	4.41709	9.71779	1.7074	13.9691	6.38783	17.3436	0.0324904	1.37609	up	K12126|7.2e-08|smo:SELMODRAFT_114141|K12126 phytochrome-interacting factor 3 | (RefSeq) PIF3; hypothetical protein	Plant hormone signal transduction (ko04075);; Circadian rhythm - plant (ko04712)
gene_Bol004811	117.662	130.587	32.7798	161.891	243.51	119.101	0.0419407	0.959619	up	K02575|8.0e-310|bna:106381913|K02575 MFS transporter, NNP family, nitrate/nitrite transporter | (RefSeq) high affinity nitrate transporter 2.6	Nitrogen metabolism (ko00910)
gene_Bol004842	31.7193	32.6741	40.3648	18.2268	28.8022	18.6279	0.00570354	-0.591102	down	K18878|1.2e-26|cann:107866053|K18878 BHLH transcription factor Upa20 | (RefSeq) Upa20; transcription factor bHLH137-like	Plant-pathogen interaction (ko04626)
gene_Bol043772	12.8133	9.63641	7.18931	23.8022	11.5724	11.418	0.0463473	0.764979	up	K18081|1.2e-09|bna:106425271|K18081 myotubularin-related protein 1/2 [EC:3.1.3.64 3.1.3.95] | (RefSeq) phosphatidylinositol-3-phosphatase myotubularin-2-like	Inositol phosphate metabolism (ko00562);; Phosphatidylinositol signaling system (ko04070)
gene_Bol039897	18.1361	16.6623	25.0969	12.7506	11.8986	9.55392	0.00290547	-0.709704	down	K00611|5.0e-194|boe:106296355|K00611 ornithine carbamoyltransferase [EC:2.1.3.3] | (RefSeq) ornithine carbamoyltransferase, chloroplastic	Arginine biosynthesis (ko00220);; Biosynthesis of amino acids (ko01230)
Brassica_oleracea_newGene_8177	0.541207	1.31893	0.571897	6.14784	3.22214	4.47839	5.03e-07	2.57329	up	--	--
gene_Bol006551	15.0122	13.4872	27.4556	9.09522	12.6953	9.65569	0.0270276	-0.73494	down	K08057|7.4e-125|boe:106311670|K08057 calreticulin | (RefSeq) calreticulin-3	Protein processing in endoplasmic reticulum (ko04141);; Phagosome (ko04145)
Brassica_oleracea_newGene_3576	1.49557	0.710482	0.576543	0.784553	2.99822	4.22827	0.0169804	1.63482	up	--	--
gene_Bol014946	32.5841	28.5039	14.1374	53.7315	42.2396	40.8431	0.00511405	0.961344	up	K24104|1.6e-74|thj:104799061|K24104 GPN-loop GTPase | (RefSeq) LOW QUALITY PROTEIN: uncharacterized protein LOC104799061	--
gene_Bol015180	6.7108	5.39232	4.9932	8.58261	8.60274	7.34592	0.0119309	0.615724	up	--	--
Brassica_oleracea_newGene_9498	2.79222	3.07409	3.58835	1.37301	0.631985	1.17044	0.000950854	-1.51091	down	--	--
gene_Bol040896	20.579	18.8314	26.1445	12.4934	9.23149	9.1239	0.000641072	-0.978504	down	K02894|6.7e-75|aly:9315515|K02894 large subunit ribosomal protein L23e | (RefSeq) 60S ribosomal protein L23	Ribosome (ko03010)
gene_Bol009658	26.861	22.2968	29.8974	13.9959	21.6331	12.6506	0.00429669	-0.631328	down	K20890|0.0e+00|bna:106347361|K20890 xylan alpha-glucuronosyltransferase [EC:2.4.1.-] | (RefSeq) putative UDP-glucuronate:xylan alpha-glucuronosyltransferase 3	--
gene_Bol005623	0.643339	1.17006	0.123408	1.30822	1.84273	3.06983	0.0201232	1.78512	up	K16225|1.1e-42|csat:104771734|K16225 probable WRKY transcription factor 52 | (RefSeq) LOW QUALITY PROTEIN: disease resistance protein RRS1-like	Plant-pathogen interaction (ko04626)
gene_Bol040068	36.2256	42.3574	42.942	23.2137	32.708	20.6191	0.00320975	-0.585996	down	K02998|2.6e-166|bna:106392144|K02998 small subunit ribosomal protein SAe | (RefSeq) 40S ribosomal protein SA-like	Ribosome (ko03010)
gene_Bol033070	8.06146	5.53532	6.1455	3.04104	4.81571	3.23622	0.0118136	-0.739451	down	K05931|1.7e-202|bna:106347615|K05931 type I protein arginine methyltransferase [EC:2.1.1.319] | (RefSeq) probable histone-arginine methyltransferase 1.4 isoform X1	--
gene_Bol009358	1.91693	1.9021	2.54834	8.23482	3.33297	2.91782	0.0371077	1.2935	up	--	--
gene_Bol038062	0.566448	0.424148	0.512833	0.897834	0.700393	1.01171	0.0434283	0.916073	up	K14726|1.2e-31|cme:CYME_CMS152C|K14726 solute carrier family 9 (sodium/hydrogen exchanger), member 10/11 | (RefSeq) probable sodium/hydrogen antiporter	--
gene_Bol030731	1.27604	0.677193	0.400595	1.58667	1.3725	1.87983	0.0402861	1.12913	up	--	--
gene_Bol043641	33.4035	68.1513	76.989	20.8556	49.6119	24.5711	0.0414347	-0.847301	down	--	--
gene_Bol033080	4.41034	3.52674	2.26124	7.05714	4.07378	5.52537	0.0350309	0.821451	up	K20770|5.8e-116|gra:105789196|K20770 (+)-delta-cadinene 8-hydroxylase [EC:1.14.-.-] | (RefSeq) flavonoid 3'-monooxygenase-like	--
gene_Bol027610	14.1559	11.9137	10.2432	19.7853	43.5105	31.355	6.83e-06	1.46197	up	K13448|2.4e-93|bna:106427309|K13448 calcium-binding protein CML | (RefSeq) calcium-binding protein CML38	Plant-pathogen interaction (ko04626)
Brassica_oleracea_newGene_2461	2.85025	1.38701	2.02041	0.539467	0.782723	0.119067	0.0013044	-2.12933	down	--	--
gene_Bol020346	40.2974	41.5137	24.7438	72.3797	46.2259	71.2365	0.00448228	0.951181	up	K20359|1.1e-111|bna:106436117|K20359 PRA1 family protein 1 | (RefSeq) PRA1 family protein B4	--
Brassica_oleracea_newGene_6736	5.60557	5.1006	4.01193	6.10302	10.3769	5.28624	0.0313344	0.611288	up	K05387|0.0e+00|bna:106348988|K05387 glutamate receptor, ionotropic, plant | (RefSeq) glutamate receptor 1.2-like	--
Brassica_oleracea_newGene_7170	1.19548	0.141793	0	7.61278	36.0402	0.25049	0.0196197	4.92166	up	--	--
gene_Bol037294	18.0655	17.7913	9.86563	18.9771	29.1796	19.3592	0.0315368	0.639249	up	K00574|0.0e+00|boe:106306681|K00574 cyclopropane-fatty-acyl-phospholipid synthase [EC:2.1.1.79] | (RefSeq) uncharacterized protein LOC106306681 isoform X1	--
gene_Bol016969	15.2108	11.7304	10.3688	27.2046	11.9923	33.9462	0.0109595	1.11442	up	K01193|1.0e-25|ats:109747879|K01193 beta-fructofuranosidase [EC:3.2.1.26] | (RefSeq) LOC109747879; beta-fructofuranosidase, insoluble isoenzyme 3-like	Galactose metabolism (ko00052);; Starch and sucrose metabolism (ko00500)
gene_Bol033793	36.361	17.9732	11.0518	34.0166	120.866	68.6337	0.000292875	1.83874	up	K14497|3.9e-25|nnu:104601109|K14497 protein phosphatase 2C [EC:3.1.3.16] | (RefSeq) protein phosphatase 2C 37-like	MAPK signaling pathway - plant (ko04016);; Plant hormone signal transduction (ko04075)
gene_Bol022408	90.8917	104.31	99.4322	76.3464	34.2796	47.3261	0.02423	-0.782135	down	--	--
gene_Bol018800	4.63441	3.76063	3.65498	2.08591	2.56593	2.3817	0.0167477	-0.678555	down	K23280|1.5e-16|sita:101773656|K23280 rhamnogalacturonan I rhamnosyltransferase [EC:2.4.1.351] | (RefSeq) uncharacterized protein At1g04910	--
gene_Bol009361	132.984	91.3494	56.0163	176.492	145.412	160.416	0.00735296	0.889938	up	K06272|9.9e-25|oeu:111367371|K06272 integrin-linked kinase [EC:2.7.11.1] | (RefSeq) integrin-linked protein kinase 1-like	--
Brassica_oleracea_newGene_4739	0.702245	1.04674	2.06033	4.68371	1.98842	2.21154	0.0375877	1.27134	up	K10398|2.1e-14|bna:106405960|K10398 kinesin family member 11 | (RefSeq) kinesin-like protein KIN-5D	--
gene_Bol018200	5.95012	7.15764	28.2763	2.99587	6.72223	1.30842	0.014364	-1.84025	down	--	--
gene_Bol036271	20.8731	9.28025	13.8543	3.11312	4.8345	4.99291	9.93e-05	-1.65496	down	K11406|1.2e-50|boe:106301381|K11406 histone deacetylase 4/5 [EC:3.5.1.98] | (RefSeq) histone deacetylase 5-like	--
gene_Bol017675	57.889	69.7865	25.2366	101.997	74.8288	85.2598	0.0271194	0.87871	up	K22547|1.2e-73|bna:106395255|K22547 arsenate reductase [EC:1.20.4.1] | (RefSeq) protein HIGH ARSENIC CONTENT 1, mitochondrial	--
gene_Bol021135	1.09612	1.58241	3.64708	0.345897	0.060561	0.369949	0.000531229	-2.84038	down	K05863|1.1e-212|bna:106416095|K05863 solute carrier family 25 (mitochondrial adenine nucleotide translocator), member 4/5/6/31 | (RefSeq) ADP,ATP carrier protein 3, mitochondrial isoform X2	--
Brassica_oleracea_newGene_866	4.12203	4.11977	2.04944	17.2717	14.844	14.4139	2.45e-09	2.25957	up	K09579|4.6e-30|aly:9329460|K09579 peptidyl-prolyl cis-trans isomerase NIMA-interacting 4 [EC:5.2.1.8] | (RefSeq) peptidyl-prolyl cis-trans isomerase NIMA-interacting 4	--
gene_Bol031236	33.1744	26.0061	15.0256	46.0373	47.3591	44.4534	0.00215182	0.989259	up	--	--
gene_Bol029984	21.3362	21.333	17.5736	34.8236	35.6977	75.7408	0.000274181	1.41712	up	K06911|3.2e-167|bna:106390237|K06911 quercetin 2,3-dioxygenase [EC:1.13.11.24] | (RefSeq) pirin-like protein 2	--
gene_Bol033160	0.564834	1.61418	1.08385	2.29898	3.27148	3.36057	0.00188892	1.52905	up	K13544|1.7e-33|thj:104804464|K13544 pheophorbidase [EC:3.1.1.82] | (RefSeq) pheophorbidase isoform X1	Porphyrin and chlorophyll metabolism (ko00860)
gene_Bol025780	21.5086	16.3924	17.4661	33.7107	25.0873	25.3351	0.00303041	0.710169	up	K16274|3.2e-170|boe:106331507|K16274 E3 ubiquitin-protein ligase AIP2 [EC:2.3.2.27] | (RefSeq) E3 ubiquitin-protein ligase AIP2	--
gene_Bol028999	1.21078	1.51271	8.84825	0.948997	0.578506	0	0.0136588	-2.8302	down	K00430|2.6e-186|bna:106370045|K00430 peroxidase [EC:1.11.1.7] | (RefSeq) peroxidase 49-like	Phenylpropanoid biosynthesis (ko00940)
gene_Bol037188	4.49283	3.82605	6.16361	1.08773	3.06153	1.73796	0.0137392	-1.19855	down	K20855|3.8e-10|dzi:111275668|K20855 beta-1,3-galactosyltransferase 1/2/3/4/5/7/8 [EC:2.4.1.-] | (RefSeq) probable beta-1,3-galactosyltransferase 4 isoform X1	--
gene_Bol021943	24.6316	36.2137	32.3751	18.6679	22.2526	8.35867	0.0141591	-0.856862	down	K05350|1.5e-148|boe:106315739|K05350 beta-glucosidase [EC:3.2.1.21] | (RefSeq) beta-glucosidase 44	Cyanoamino acid metabolism (ko00460);; Starch and sucrose metabolism (ko00500);; Phenylpropanoid biosynthesis (ko00940)
gene_Bol030580	8.97864	9.4538	8.47708	13.6773	32.1222	15.3639	0.00036529	1.24488	up	--	--
gene_Bol040258	0.473097	0.389584	0.574184	0.180031	0.237641	0.096327	0.0106377	-1.37638	down	--	--
gene_Bol024327	6.24477	8.74054	9.282	14.9696	13.2675	14.7583	0.000368466	0.932035	up	--	--
gene_Bol023188	13.5011	20.4007	12.7224	34.2473	17.2406	33.4299	0.0166657	0.986809	up	K20896|2.7e-06|bvg:104904938|K20896 formylaminopyrimidine deformylase / aminopyrimidine aminohydrolase [EC:3.5.1.- 3.5.99.-] | (RefSeq) uncharacterized LOC104904938	Thiamine metabolism (ko00730)
gene_Bol043743	2.05516	2.4445	3.95316	0.224081	0.140155	0	2.18e-07	-4.25676	down	--	--
gene_Bol027824	5.88439	8.14865	4.08266	2.94114	2.15959	3.06532	0.00921602	-1.03989	down	K15893|2.2e-216|bna:106353869|K15893 glycerate dehydrogenase [EC:1.1.1.29] | (RefSeq) glycerate dehydrogenase HPR, peroxisomal-like	Glycine, serine and threonine metabolism (ko00260);; Glyoxylate and dicarboxylate metabolism (ko00630);; Carbon metabolism (ko01200)
Brassica_oleracea_newGene_3888	5.50305	5.74282	3.36887	6.73248	8.78405	5.86014	0.0432647	0.609861	up	--	--
gene_Bol013059	6.58629	8.4187	5.85345	9.65736	15.1872	11.6751	0.00165561	0.889957	up	--	--
gene_Bol016127	2.8339	4.32791	10.5647	2.15061	0.693062	1.09314	0.000764888	-2.03627	down	K08150|0.0e+00|bna:106375935|K08150 MFS transporter, SP family, solute carrier family 2 (myo-inositol transporter), member 13 | (RefSeq) probable inositol transporter 2	--
gene_Bol009884	18.928	30.9706	20.0816	46.9337	25.8505	47.6633	0.0199668	0.903494	up	K11584|3.8e-32|dcr:108200982|K11584 serine/threonine-protein phosphatase 2A regulatory subunit B' | (RefSeq) serine/threonine protein phosphatase 2A 57 kDa regulatory subunit B' beta isoform-like	mRNA surveillance pathway (ko03015)
gene_Bol023016	108.672	77.3323	68.567	106.089	113.596	135.472	0.0237181	0.592131	up	K03239|2.3e-10|ath:AT1G53900|K03239 translation initiation factor eIF-2B subunit alpha | (RefSeq) Eukaryotic translation initiation factor 2B (eIF-2B) family protein	RNA transport (ko03013)
gene_Bol013919	16.8097	15.6281	36.5122	11.6086	17.4138	9.98161	0.0488871	-0.736139	down	--	--
gene_Bol036089	1.48718	1.70894	1.53033	0.268412	1.0352	0.623767	0.049137	-1.1861	down	K00423|1.4e-149|boe:106318999|K00423 L-ascorbate oxidase [EC:1.10.3.3] | (RefSeq) L-ascorbate oxidase-like	Ascorbate and aldarate metabolism (ko00053)
gene_Bol021609	31.7255	28.5458	32.244	16.1372	15.3436	16.0522	0.00111914	-0.857129	down	--	--
gene_Bol023091	91.9127	90.4983	124.503	58.1071	96.2483	36.5433	0.0493243	-0.623019	down	K02973|2.1e-75|bna:106372613|K02973 small subunit ribosomal protein S23e | (RefSeq) 40S ribosomal protein S23-2	Ribosome (ko03010)
Brassica_oleracea_newGene_4139	1.64614	9.74141	1.48571	0.611737	0.58069	1.20734	0.00461233	-2.27955	down	K06174|5.6e-29|bna:106375064|K06174 ATP-binding cassette, sub-family E, member 1 | (RefSeq) F-box/kelch-repeat protein At3g13680-like isoform X1	--
gene_Bol013699	17.9983	17.1816	29.4114	6.94607	10.3814	5.63449	1.56e-06	-1.41126	down	K03884|3.0e-29|nau:109243048|K03884 NADH-ubiquinone oxidoreductase chain 6 [EC:7.1.1.2] | (RefSeq) uncharacterized protein LOC109243048	Oxidative phosphorylation (ko00190)
Brassica_oleracea_newGene_7272	0.802517	0.981839	3.56296	0.625336	0.490136	0.651711	0.0214591	-1.50205	down	K01728|1.3e-213|bna:106424219|K01728 pectate lyase [EC:4.2.2.2] | (RefSeq) probable pectate lyase 1 isoform X1	Pentose and glucuronate interconversions (ko00040)
gene_Bol012032	4.57527	2.94228	2.00771	5.72622	7.96066	6.16314	0.001647	1.14501	up	K23452|3.4e-48|bna:106435475|K23452 UDP-glucosyltransferase 85A [EC:2.4.1.-] | (RefSeq) UDP-glycosyltransferase 85A1-like	Zeatin biosynthesis (ko00908)
gene_Bol010684	48.9036	51.6831	31.2476	83.1527	83.1276	102.913	5.77e-05	1.13801	up	--	--
gene_Bol015833	38.5696	18.3487	8.50471	48.4582	47.8571	77.0881	0.0026657	1.53153	up	K00430|4.1e-179|boe:106332899|K00430 peroxidase [EC:1.11.1.7] | (RefSeq) peroxidase 69	Phenylpropanoid biosynthesis (ko00940)
gene_Bol018999	1.74061	0.981646	0.4964	4.65019	2.59603	2.42984	0.00520388	1.67229	up	K12173|7.5e-33|gmx:100794341|K12173 BRCA1-A complex subunit BRE | (RefSeq) BRISC and BRCA1-A complex member 2	Homologous recombination (ko03440)
gene_Bol010737	3.9922	1.0969	2.57486	5.68553	13.7211	5.18949	0.00362829	1.72593	up	K13448|3.4e-71|boe:106333174|K13448 calcium-binding protein CML | (RefSeq) probable calcium-binding protein CML40	Plant-pathogen interaction (ko04626)
Brassica_oleracea_newGene_11855	0.468204	0.756616	0.401768	1.13342	0.86752	1.22183	0.0132418	1.11051	up	K13457|3.7e-14|qsu:111991885|K13457 disease resistance protein RPM1 | (RefSeq) putative disease resistance protein At1g50180	Plant-pathogen interaction (ko04626)
gene_Bol026390	1.42277	3.5295	4.34055	0.251635	1.88609	0.805286	0.0241352	-1.60993	down	K01206|1.5e-269|bna:106446723|K01206 alpha-L-fucosidase [EC:3.2.1.51] | (RefSeq) alpha-L-fucosidase 1-like	Other glycan degradation (ko00511)
gene_Bol023923	2.26004	3.25593	5.2983	2.11879	0.349555	0.951888	0.0356686	-1.50582	down	K20628|7.8e-124|pmum:103338493|K20628 expansin | (RefSeq) expansin-A1-like	--
gene_Bol013132	138.451	147.348	93.9033	317.345	151.429	213.127	0.00609371	0.959453	up	--	--
gene_Bol023024	4.401	3.92246	4.06054	4.72332	6.83059	6.47297	0.0186238	0.640359	up	K20165|4.0e-204|boe:106326751|K20165 TBC1 domain family member 2A | (RefSeq) TBC1 domain family member 2B-like	--
gene_Bol009562	1.01594	1.33368	1.23337	0.596018	0.669959	0.49625	0.00795768	-0.923435	down	K01179|4.8e-288|fve:101292804|K01179 endoglucanase [EC:3.2.1.4] | (RefSeq) endoglucanase 25	Starch and sucrose metabolism (ko00500)
gene_Bol043128	35.8282	30.5643	22.9861	48.4325	41.0983	62.2302	0.00379707	0.884388	up	K13456|9.9e-126|bna:106349006|K13456 RPM1-interacting protein 4 | (RefSeq) RPM1-interacting protein 4	Plant-pathogen interaction (ko04626)
gene_Bol023831	43.6594	54.0631	71.4689	27.2008	37.241	24.1521	0.00170855	-0.847236	down	K02921|1.5e-46|aly:9312611|K02921 large subunit ribosomal protein L37Ae | (RefSeq) 60S ribosomal protein L37a-2	Ribosome (ko03010)
Brassica_oleracea_newGene_4261	11.9136	11.5073	13.913	26.7365	14.1136	14.8194	0.0449849	0.685919	up	--	--
gene_Bol005791	38.474	36.4132	19.299	50.1221	41.7239	52.7101	0.025713	0.727428	up	K07761|3.0e-109|thj:104823666|K07761 metalloendoproteinase 5-MMP [EC:3.4.24.-] | (RefSeq) metalloendoproteinase 5-MMP	--
gene_Bol015540	1.43853	3.77718	3.04431	1.53489	0.560049	1.0366	0.0398801	-1.26884	down	K00430|5.7e-186|bna:106417749|K00430 peroxidase [EC:1.11.1.7] | (RefSeq) peroxidase 67-like	Phenylpropanoid biosynthesis (ko00940)
gene_Bol027518	94.6442	99.8122	137.815	75.6958	79.4225	51.3625	0.0100686	-0.597596	down	--	--
gene_Bol024283	102.615	121.914	55.7844	147.586	178.316	171.573	0.0041798	0.921366	up	--	--
gene_Bol027649	5.88846	5.95886	5.38594	3.89334	3.72846	1.84064	0.013054	-0.785454	down	K23280|5.6e-91|nau:109214571|K23280 rhamnogalacturonan I rhamnosyltransferase [EC:2.4.1.351] | (RefSeq) uncharacterized protein At1g04910	--
gene_Bol041033	4.36808	1.42792	0.298313	4.44247	7.21614	7.10534	0.0246622	1.72206	up	K00847|3.8e-182|bna:106400121|K00847 fructokinase [EC:2.7.1.4] | (RefSeq) probable fructokinase-2	Fructose and mannose metabolism (ko00051);; Starch and sucrose metabolism (ko00500);; Amino sugar and nucleotide sugar metabolism (ko00520)
Brassica_oleracea_newGene_11343	2.65653	8.97039	11.1223	1.44243	2.60864	1.3188	0.00058186	-2.00192	down	--	--
gene_Bol009666	0.88679	0.878471	1.7287	0.389058	0.649977	0.297149	0.0355936	-1.27701	down	--	--
gene_Bol018370	2.47121	1.20088	1.2053	3.50719	1.98751	3.43704	0.041328	0.990788	up	K05941|2.7e-263|bna:106403103|K05941 glutathione gamma-glutamylcysteinyltransferase [EC:2.3.2.15] | (RefSeq) glutathione gamma-glutamylcysteinyltransferase 2	--
gene_Bol020364	1.20917	4.63842	6.11831	1.45849	1.3475	1.05495	0.018841	-1.51441	down	K20728|3.7e-44|thj:104814965|K20728 vegetative storage protein 2 | (RefSeq) vegetative storage protein 2-like	MAPK signaling pathway - plant (ko04016)
gene_Bol008656	10.1492	8.07566	11.2711	7.24116	5.75662	4.63717	0.0432682	-0.642687	down	K10575|9.0e-95|boe:106298666|K10575 ubiquitin-conjugating enzyme E2 G1 [EC:2.3.2.23] | (RefSeq) ubiquitin-conjugating enzyme E2 14	Ubiquitin mediated proteolysis (ko04120);; Protein processing in endoplasmic reticulum (ko04141)
gene_Bol015138	9.31892	8.68139	6.59297	20.1476	12.2125	16.5219	0.00062222	1.10267	up	--	--
gene_Bol037779	0.937071	0.507513	0.629408	1.37942	2.24855	0.644862	0.0466811	1.08707	up	K08150|0.0e+00|bna:106371941|K08150 MFS transporter, SP family, solute carrier family 2 (myo-inositol transporter), member 13 | (RefSeq) probable inositol transporter 3	--
gene_Bol042775	17.4386	14.656	10.1054	52.1332	11.8486	37.7746	0.00761576	1.40925	up	--	--
gene_Bol011751	46.8388	61.4213	44.9096	104.789	75.1496	76.9743	0.00195977	0.845269	up	K08770|2.6e-36|aly:9307090|K08770 ubiquitin C | (RefSeq) polyubiquitin 4	Ubiquitin mediated proteolysis (ko04120)
gene_Bol008787	5.58116	4.24039	1.79463	13.0226	4.74007	13.8301	0.00551588	1.58417	up	--	--
gene_Bol044268	0.882593	0.489517	0.42213	1.07407	1.99782	1.38271	0.00553442	1.37227	up	K09264|2.0e-18|ghi:107924817|K09264 MADS-box transcription factor, plant | (RefSeq) agamous-like MADS-box protein AGL21	--
gene_Bol023935	2.75665	1.46855	1.8101	11.1844	12.8103	8.51974	2.49e-18	2.51317	up	K24195|5.3e-129|ppp:112273420|K24195 xenotropic and polytropic retrovirus receptor 1 | (RefSeq) phosphate transporter PHO1-like	--
gene_Bol014627	59.2227	40.2186	38.2946	80.0822	57.743	69.8895	0.00877463	0.70696	up	K19525|1.3e-12|smo:SELMODRAFT_440026|K19525 vacuolar protein sorting-associated protein 13A/C | (RefSeq) hypothetical protein	--
gene_Bol032060	13.1696	15.7794	7.25166	26.8352	15.1464	29.4949	0.00732464	1.10604	up	K09843|2.6e-269|bna:106416491|K09843 (+)-abscisic acid 8'-hydroxylase [EC:1.14.14.137] | (RefSeq) abscisic acid 8'-hydroxylase 3	Carotenoid biosynthesis (ko00906)
gene_Bol018634	58.0717	46.2009	40.8949	56.3602	114.33	52.8296	0.0229149	0.685266	up	K09419|3.1e-145|bna:106407137|K09419 heat shock transcription factor, other eukaryote | (RefSeq) heat stress transcription factor B-1	--
gene_Bol004475	1.85556	1.23036	0.314401	1.58975	2.69713	4.62492	0.0369479	1.50563	up	K16226|2.6e-40|ath:AT5G45250|K16226 disease resistance protein RPS4 | (RefSeq) RPS4; Disease resistance protein (TIR-NBS-LRR class) family	Plant-pathogen interaction (ko04626)
gene_Bol015853	24.1553	21.5033	38.0702	34.4382	91.4192	59.4421	0.00128759	1.22578	up	--	--
gene_Bol036868	357.741	367.558	367.596	444.759	535.746	827.519	0.00421434	0.850216	up	K02703|1.6e-205|bna:11542063|K02703 photosystem II P680 reaction center D1 protein [EC:1.10.3.9] | (RefSeq) psbA, BRNAC_p001; photosystem II protein D1	Photosynthesis (ko00195)
gene_Bol045915	13.5724	9.51924	8.20223	11.6971	22.5214	20.11	0.00525429	0.890157	up	K23544|3.7e-175|brp:103842861|K23544 serine incorporator 1/3 | (RefSeq) serine incorporator 3	--
gene_Bol025384	9.83972	7.26891	7.72234	10.5776	16.7342	9.59715	0.0173987	0.649294	up	--	--
gene_Bol012407	7.2335	6.02348	7.78833	16.1703	12.3319	13.9622	1.1e-06	1.12527	up	K21867|0.0e+00|boe:106306750|K21867 potassium channel | (RefSeq) potassium channel GORK	--
gene_Bol009126	2.95601	4.34789	2.14124	4.62446	7.34161	10.6244	0.00248863	1.36381	up	K10260|4.4e-13|mpp:MICPUCDRAFT_56233|K10260 F-box and WD-40 domain protein 7 | (RefSeq) WD40 repeat protein	Ubiquitin mediated proteolysis (ko04120)
gene_Bol032069	13.749	19.8531	18.7831	8.20841	13.8368	10.6234	0.0218539	-0.595053	down	K20989|0.0e+00|bna:106418294|K20989 urea-proton symporter | (RefSeq) urea-proton symporter DUR3	--
gene_Bol010859	18.7821	9.60214	56.0537	2.15424	11.0938	3.64576	0.000721372	-2.26488	down	K22683|1.4e-276|bna:106433936|K22683 aspartyl protease family protein [EC:3.4.23.-] | (RefSeq) aspartyl protease family protein 2	--
gene_Bol034356	26.5248	20.555	21.1482	31.7453	32.6056	41.1506	0.00224786	0.743442	up	K13379|2.3e-220|bna:106432530|K13379 reversibly glycosylated polypeptide / UDP-arabinopyranose mutase [EC:2.4.1.- 5.4.99.30] | (RefSeq) UDP-arabinopyranose mutase 2-like	Amino sugar and nucleotide sugar metabolism (ko00520)
gene_Bol039762	2.80727	3.52607	0.889215	2.78561	12.2816	8.40817	0.00870907	1.7576	up	K17338|4.7e-109|brp:103857603|K17338 receptor expression-enhancing protein 1/2/3/4 | (RefSeq) HVA22-like protein j	--
gene_Bol036041	4.45431	4.70851	6.00433	2.56298	3.20447	3.29693	0.0185406	-0.635909	down	K02865|1.1e-112|bna:106436648|K02865 large subunit ribosomal protein L10Ae | (RefSeq) 60S ribosomal protein L10a-3-like	Ribosome (ko03010)
gene_Bol039592	281.618	110.115	54.7879	318.901	312.187	320.094	0.0162836	1.1974	up	--	--
gene_Bol015841	6.94906	7.75622	10.5392	3.85288	5.23116	4.76691	0.00395469	-0.765006	down	--	--
gene_Bol016126	25.2682	33.718	34.9447	20.897	21.8353	13.8115	0.00879119	-0.645676	down	K03232|1.3e-94|bna:106361591|K03232 elongation factor 1-beta | (RefSeq) elongation factor 1-delta 1-like isoform X1	--
gene_Bol014056	26.2301	23.6515	20.8459	45.2823	25.7692	30.8544	0.0321763	0.638617	up	--	--
gene_Bol039121	45.1403	39.7332	69.571	17.8979	30.8008	24.3725	0.000622932	-0.984041	down	K03152|2.8e-228|brp:103871137|K03152 protein deglycase [EC:3.5.1.124] | (RefSeq) LOW QUALITY PROTEIN: protein DJ-1 homolog B-like	--
gene_Bol023783	9.54166	6.65788	6.42877	9.71195	13.9084	10.227	0.00818455	0.667838	up	--	--
gene_Bol030074	6.65052	4.16948	2.86801	13.1447	13.0109	10.7037	6.84e-05	1.52456	up	--	--
gene_Bol015480	17.534	7.57865	10.9607	63.6679	12.0149	56.6059	0.000771185	2.0303	up	K07025|5.3e-71|boe:106322978|K07025 putative hydrolase of the HAD superfamily | (RefSeq) suppressor of disruption of TFIIS-like	--
gene_Bol030178	2.52641	3.63127	1.82245	9.74255	4.03777	7.50824	0.00130478	1.53095	up	K13265|5.4e-89|gmx:100793687|K13265 vestitone reductase [EC:1.1.1.348] | (RefSeq) uncharacterized protein LOC100793687	Isoflavonoid biosynthesis (ko00943)
gene_Bol040387	1.44122	1.08316	1.99916	0.510314	0.605753	0.658443	0.0124632	-1.22548	down	--	--
gene_Bol044850	17.3874	18.1183	14.531	24.8283	21.2836	25.1772	0.00703366	0.620222	up	--	--
gene_Bol010485	14.732	14.6591	37.9989	6.85766	16.1223	7.3157	0.0185695	-1.08383	down	K01206|6.5e-186|boe:106299976|K01206 alpha-L-fucosidase [EC:3.2.1.51] | (RefSeq) alpha-L-fucosidase 3	Other glycan degradation (ko00511)
gene_Bol024423	4.2947	3.76787	6.5622	2.5858	3.25194	1.87995	0.00908609	-0.832578	down	--	--
gene_Bol032239	9.17242	6.00858	4.38716	12.846	14.7011	12.2889	0.000225926	1.11947	up	K20887|0.0e+00|boe:106318683|K20887 xyloglucan glycosyltransferase 4 [EC:2.4.1.-] | (RefSeq) xyloglucan glycosyltransferase 4-like	--
Brassica_oleracea_newGene_9334	0.343223	0.243509	0.061775	1.19757	1.73107	0.77404	2.98e-05	2.55796	up	K17604|2.4e-65|oeu:111409841|K17604 zinc finger SWIM domain-containing protein 3 | (RefSeq) uncharacterized protein LOC111409841	--
gene_Bol014028	79.253	77.3386	86.4847	42.3782	71.9764	38.5372	0.0125782	-0.594679	down	K22048|1.4e-23|csv:101209209|K22048 mechanosensitive ion channel protein 4/5/6/7/8/9/10 | (RefSeq) mechanosensitive ion channel protein 10	--
gene_Bol009413	1.70954	2.47619	1.95128	0.473739	0.715092	1.14232	0.0446031	-1.24587	down	K07560|9.8e-112|bna:106375608|K07560 D-aminoacyl-tRNA deacylase [EC:3.1.1.96] | (RefSeq) D-tyrosyl-tRNA(Tyr) deacylase	--
gene_Bol010462	1.34912	1.556	1.66146	0.772705	1.23259	0.48253	0.0431297	-0.79544	down	K01427|0.0e+00|bna:106396876|K01427 urease [EC:3.5.1.5] | (RefSeq) urease-like	Arginine biosynthesis (ko00220);; Purine metabolism (ko00230)
gene_Bol038199	30.9778	52.6616	76.145	8.33282	24.4245	11.9213	3.89e-05	-1.77448	down	K23544|3.4e-120|brp:103842861|K23544 serine incorporator 1/3 | (RefSeq) serine incorporator 3	--
gene_Bol039120	11.7469	15.7745	20.7056	4.66206	9.49951	5.77262	0.00121429	-1.19094	down	K00850|6.5e-13|bna:106371466|K00850 6-phosphofructokinase 1 [EC:2.7.1.11] | (RefSeq) ATP-dependent 6-phosphofructokinase 7	Glycolysis / Gluconeogenesis (ko00010);; Pentose phosphate pathway (ko00030);; Fructose and mannose metabolism (ko00051);; Galactose metabolism (ko00052);; Carbon metabolism (ko01200);; Biosynthesis of amino acids (ko01230);; RNA degradation (ko03018)
Brassica_oleracea_newGene_6186	3.42524	1.26101	4.43716	1.87962	12.3922	10.5268	0.0496371	1.53116	up	--	--
gene_Bol034850	67.7426	71.4026	57.655	104.381	74.4641	101.782	0.0132407	0.62767	up	K03787|2.2e-169|bna:106381282|K03787 5'-nucleotidase [EC:3.1.3.5] | (RefSeq) uncharacterized protein LOC106381282	Purine metabolism (ko00230);; Pyrimidine metabolism (ko00240);; Nicotinate and nicotinamide metabolism (ko00760)
gene_Bol030149	41.6053	58.3824	43.1082	77.9944	64.0088	77.4696	0.00749186	0.724412	up	K09481|2.8e-20|bna:106454557|K09481 protein transport protein SEC61 subunit beta | (RefSeq) protein transport protein Sec61 subunit beta-like	Protein export (ko03060);; Protein processing in endoplasmic reticulum (ko04141);; Phagosome (ko04145)
gene_Bol005000	30.941	30.4329	34.6034	59.1685	57.8481	31.9885	0.00541192	0.715933	up	K10802|2.2e-37|bna:106376908|K10802 high mobility group protein B1 | (RefSeq) high mobility group B protein 1-like	Base excision repair (ko03410)
Brassica_oleracea_newGene_5082	0.678265	1.16519	1.92327	0.151707	0.09762	0.353053	0.000580284	-2.3983	down	--	--
gene_Bol014874	4.7513	5.34818	5.23021	2.85971	1.02726	2.38752	0.0155051	-1.14999	down	K02433|5.1e-17|apro:F751_6020|K02433 aspartyl-tRNA(Asn)/glutamyl-tRNA(Gln) amidotransferase subunit A [EC:6.3.5.6 6.3.5.7] | (RefSeq) Glutamyl-tRNA(Gln) amidotransferase subunit A	Aminoacyl-tRNA biosynthesis (ko00970)
gene_Bol027147	73.6319	170.31	86.007	69.445	35.8846	6.02652	0.0257297	-1.50346	down	K15692|5.0e-37|tcc:18610751|K15692 E3 ubiquitin-protein ligase RNF13 [EC:2.3.2.27] | (RefSeq) receptor homology region, transmembrane domain- and RING domain-containing protein 1	--
gene_Bol037773	37.6366	45.5278	49.998	22.8374	37.217	21.5355	0.00880153	-0.629987	down	--	--
gene_Bol038991	10.615	4.99897	4.43395	7.50167	48.8481	7.24594	0.0297239	1.66765	up	--	--
gene_Bol032687	6.76463	6.05711	9.96425	5.24968	4.56194	4.20153	0.0425161	-0.593533	down	K22218|1.4e-08|apro:F751_2022|K22218 protein-tyrosine sulfotransferase [EC:2.8.2.20] | (RefSeq) Protein-tyrosine sulfotransferase	--
gene_Bol038589	49.1407	40.5901	12.3157	49.739	63.8769	104.094	0.016686	1.21365	up	--	--
gene_Bol037264	5.62208	9.17567	3.95575	6.71793	15.3063	11.6491	0.0339606	0.915944	up	K15688|8.2e-07|ath:AT1G59560|K15688 E3 ubiquitin-protein ligase MUL1 [EC:2.3.2.27] | (RefSeq) ZCF61; E3 Ubiquitin ligase family protein	--
gene_Bol025599	1.21081	1.69409	2.07165	0.257773	0.681573	0.36838	0.00189068	-1.8337	down	K00430|1.2e-202|boe:106332075|K00430 peroxidase [EC:1.11.1.7] | (RefSeq) peroxidase C2	Phenylpropanoid biosynthesis (ko00940)
Brassica_oleracea_newGene_1037	43.6884	43.0724	43.7856	24.7611	35.2646	20.4369	0.00167121	-0.624617	down	K19891|1.8e-07|gmx:100776826|K19891 glucan endo-1,3-beta-glucosidase 1/2/3 [EC:3.2.1.39] | (RefSeq) glucan endo-1,3-beta-glucosidase 1	Starch and sucrose metabolism (ko00500)
gene_Bol020546	27.8322	38.0572	62.3538	22.9635	30.4382	19.4791	0.0245349	-0.728834	down	K00121|3.6e-67|mpp:MICPUCDRAFT_56831|K00121 S-(hydroxymethyl)glutathione dehydrogenase / alcohol dehydrogenase [EC:1.1.1.284 1.1.1.1] | (RefSeq) formaldehyde dehydrogenase/S-formylglutathione hydrolase	Glycolysis / Gluconeogenesis (ko00010);; Fatty acid degradation (ko00071);; Tyrosine metabolism (ko00350);; Carbon metabolism (ko01200)
gene_Bol004457	2.55262	2.63908	5.11443	0.708139	0	0.89952	0.0188101	-2.44722	down	K07466|3.2e-12|boe:106336275|K07466 replication factor A1 | (RefSeq) uncharacterized protein LOC106336275	DNA replication (ko03030);; Nucleotide excision repair (ko03420);; Mismatch repair (ko03430);; Homologous recombination (ko03440)
gene_Bol008594	10.6521	6.34519	5.16356	18.1858	8.83107	12.8912	0.0294327	0.967136	up	K12761|3.9e-40|ini:109164801|K12761 carbon catabolite-derepressing protein kinase [EC:2.7.11.1] | (RefSeq) CBL-interacting serine/threonine-protein kinase 7-like	--
gene_Bol017621	101.624	63.4753	74.3241	129.634	93.7049	111.447	0.0264627	0.598456	up	K17362|3.7e-82|bna:106422217|K17362 acyl-coenzyme A thioesterase 13 [EC:3.1.2.-] | (RefSeq) acyl-coenzyme A thioesterase 13-like	--
gene_Bol016898	44.575	42.9433	62.2303	21.5521	32.9572	25.3165	0.000447228	-0.81574	down	K09753|1.2e-82|ini:109191772|K09753 cinnamoyl-CoA reductase [EC:1.2.1.44] | (RefSeq) cinnamoyl-CoA reductase 1-like	Phenylpropanoid biosynthesis (ko00940)
gene_Bol022961	16.5906	18.9077	23.622	6.84958	18.1388	8.45347	0.0261311	-0.76052	down	K12121|0.0e+00|bna:106358161|K12121 phytochrome B | (RefSeq) phytochrome B	Circadian rhythm - plant (ko04712)
gene_Bol025722	1.27173	1.15152	0.948008	3.51321	3.73196	1.96475	0.00411132	1.53702	up	K07466|3.4e-08|boe:106336275|K07466 replication factor A1 | (RefSeq) uncharacterized protein LOC106336275	DNA replication (ko03030);; Nucleotide excision repair (ko03420);; Mismatch repair (ko03430);; Homologous recombination (ko03440)
gene_Bol027110	260.135	211.384	50.2402	561.592	853.099	598.827	5.66e-05	2.02535	up	K20769|5.5e-07|mesc:110611169|K20769 fatty acid omega-hydroxylase [EC:1.14.-.-] | (RefSeq) cytochrome P450 94A2-like	Cutin, suberine and wax biosynthesis (ko00073)
Brassica_oleracea_newGene_11668	10.7854	9.76476	7.8075	6.88663	5.09502	4.7285	0.0204635	-0.660893	down	--	--
Brassica_oleracea_newGene_685	0.776403	0.619612	0.625738	0.028424	0.129887	0.075665	4.01e-05	-2.72939	down	--	--
gene_Bol045131	4.57014	4.01931	3.96	6.88646	9.50305	10.5731	0.00535985	1.1976	up	K18663|5.5e-10|bna:106382732|K18663 activating signal cointegrator complex subunit 3 [EC:3.6.4.12] | (RefSeq) DExH-box ATP-dependent RNA helicase DExH14	--
gene_Bol042065	3.22992	1.79189	1.59441	4.38238	1.7592	20.7035	0.0182146	2.16343	up	--	--
gene_Bol014223	17.5932	11.2361	12.7545	21.353	44.6178	28.0583	0.000682199	1.25139	up	--	--
gene_Bol037200	11.3972	11.817	13.3483	5.73007	9.80951	4.92834	0.00264364	-0.765471	down	--	--
Brassica_oleracea_newGene_11526	7.77599	8.72911	11.0141	3.05304	0.75361	2.39291	0.000115398	-1.98043	down	--	--
gene_Bol028041	2.13878	2.01876	1.70009	2.83858	3.2072	2.51305	0.0388035	0.633619	up	K05765|5.1e-72|bna:106391251|K05765 cofilin | (RefSeq) actin-depolymerizing factor 12-like	--
gene_Bol045832	260.884	199.773	186.957	336.33	322.383	388.925	0.000468443	0.806672	up	--	--
gene_Bol038103	453.519	425.767	278.403	878.665	473.716	878.511	0.00218565	1.07351	up	--	--
gene_Bol007930	8.68854	9.05385	10.9743	5.85241	7.41797	2.98807	0.0259457	-0.747501	down	K00787|1.8e-190|bna:106406977|K00787 farnesyl diphosphate synthase [EC:2.5.1.1 2.5.1.10] | (RefSeq) farnesyl pyrophosphate synthase 1, mitochondrial	Terpenoid backbone biosynthesis (ko00900)
gene_Bol031242	41.4312	42.0838	56.5548	25.782	40.7454	13.4331	0.0285817	-0.751149	down	K01961|1.5e-308|bna:106418201|K01961 acetyl-CoA carboxylase, biotin carboxylase subunit [EC:6.4.1.2 6.3.4.14] | (RefSeq) biotin carboxylase, chloroplastic	Fatty acid biosynthesis (ko00061);; Pyruvate metabolism (ko00620);; Propanoate metabolism (ko00640);; Carbon metabolism (ko01200);; Fatty acid metabolism (ko01212)
gene_Bol008424	15.307	17.0904	12.1579	32.4807	15.262	21.8632	0.0359129	0.7588	up	--	--
Brassica_oleracea_newGene_1701	1.86407	3.19348	2.52375	5.10304	4.98301	2.50535	0.0417643	0.794703	up	--	--
gene_Bol037087	2.4197	2.86317	4.69477	1.14104	1.85219	0.358292	0.00699677	-1.5209	down	K03695|2.5e-34|egr:104416563|K03695 ATP-dependent Clp protease ATP-binding subunit ClpB | (RefSeq) chaperone protein ClpB1-like	--
Brassica_oleracea_newGene_10056	4.44874	4.46896	2.8498	4.20962	8.44437	9.47923	0.00883787	1.01337	up	K13466|1.3e-09|qsu:111990316|K13466 EIX receptor 1/2 | (RefSeq) receptor-like protein EIX2	Plant-pathogen interaction (ko04626)
gene_Bol020424	55.0528	52.6585	30.2661	81.5166	107.031	86.784	8.57e-05	1.08436	up	K18368|1.1e-178|bna:106420616|K18368 caffeoylshikimate esterase [EC:3.1.1.-] | (RefSeq) caffeoylshikimate esterase-like isoform X1	Phenylpropanoid biosynthesis (ko00940)
gene_Bol032918	291.005	240.506	181.654	439.723	242.67	418.697	0.0234991	0.752666	up	K19891|8.9e-69|eus:EUTSA_v10004013mg|K19891 glucan endo-1,3-beta-glucosidase 1/2/3 [EC:3.2.1.39] | (RefSeq) hypothetical protein	Starch and sucrose metabolism (ko00500)
gene_Bol043671	3.06114	7.20141	6.6963	0.89887	1.57682	1.3629	0.000328428	-2.05429	down	K11253|1.4e-66|adu:107470357|K11253 histone H3 | (RefSeq) histone H3.2	--
gene_Bol032153	5.03459	3.53541	2.74254	6.79874	5.02461	5.7009	0.0466208	0.737703	up	--	--
gene_Bol042889	67.2416	62.2064	37.2176	87.793	63.359	84.2761	0.0477565	0.611489	up	--	--
gene_Bol035026	0.7835	0.421078	0.939277	1.93201	1.64516	1.41773	0.0214972	1.28658	up	K07904|3.4e-08|crb:17879594|K07904 Ras-related protein Rab-11A | (RefSeq) LOW QUALITY PROTEIN: ras and EF-hand domain-containing protein	Endocytosis (ko04144)
gene_Bol020415	5.20862	3.09344	4.70675	2.49058	2.672	2.6544	0.0435873	-0.626752	down	--	--
gene_Bol027211	2.10416	5.2485	3.50394	2.36422	1.28358	1.23598	0.0291492	-1.05597	down	K19791|1.6e-246|adu:107487768|K19791 iron transport multicopper oxidase | (RefSeq) L-ascorbate oxidase homolog	--
gene_Bol031354	75.9854	56.2974	38.7589	29.5696	39.5579	33.5987	0.023052	-0.64224	down	K22324|3.2e-182|brp:103843151|K22324 aliphatic glucosinolate S-oxygenase [EC:1.14.13.237] | (RefSeq) flavin-containing monooxygenase FMO GS-OX5	--
gene_Bol032170	12.193	9.04817	11.1251	4.89904	8.6247	6.33549	0.025854	-0.617143	down	--	--
Brassica_oleracea_newGene_11028	5.06429	5.43396	6.80486	7.47787	12.3119	5.91995	0.027857	0.610205	up	--	--
gene_Bol015027	7.30643	11.634	9.64857	3.13255	7.24755	4.86813	0.0191328	-0.831738	down	K18789|3.4e-70|cic:CICLE_v10010628mg|K18789 xylogalacturonan beta-1,3-xylosyltransferase [EC:2.4.2.41] | (RefSeq) hypothetical protein	--
gene_Bol026242	2.62701	3.27491	5.3872	1.36915	2.36038	1.52272	0.0118769	-1.00822	down	K03327|7.6e-264|boe:106300700|K03327 multidrug resistance protein, MATE family | (RefSeq) MATE efflux family protein 5	--
gene_Bol039637	2.58892	2.43581	1.1175	3.7733	12.8722	4.51428	0.00165328	1.81805	up	K13448|6.4e-120|boe:106310973|K13448 calcium-binding protein CML | (RefSeq) probable calcium-binding protein CML21	Plant-pathogen interaction (ko04626)
gene_Bol018711	9.77429	8.25229	13.0456	3.75678	9.41226	3.80186	0.0361564	-0.811425	down	K01866|2.3e-08|gra:105775527|K01866 tyrosyl-tRNA synthetase [EC:6.1.1.1] | (RefSeq) uncharacterized LOC105775527	Aminoacyl-tRNA biosynthesis (ko00970)
gene_Bol033019	30.0974	33.0724	41.8906	21.1958	24.9912	13.4918	0.00606123	-0.736289	down	K02900|6.1e-79|bna:106405628|K02900 large subunit ribosomal protein L27Ae | (RefSeq) 60S ribosomal protein L27a-3-like	Ribosome (ko03010)
gene_Bol038772	93.3556	175.262	105.346	192.392	147.748	262.279	0.0262428	0.809639	up	--	--
gene_Bol013048	18.663	14.6036	8.05875	52.5928	15.0197	23.7685	0.0118018	1.2637	up	K23717|2.8e-211|gmx:100820533|K23717 solute carrier family 23 (nucleobase transporter), member 2 | (RefSeq) nucleobase-ascorbate transporter 4	--
Brassica_oleracea_newGene_8732	0.180104	0.381139	0	0.854509	0.68448	1.20404	0.0317773	2.28596	up	K18592|7.3e-122|boe:106319304|K18592 gamma-glutamyltranspeptidase / glutathione hydrolase / leukotriene-C4 hydrolase [EC:2.3.2.2 3.4.19.13 3.4.19.14] | (RefSeq) gamma-glutamyltranspeptidase 1-like	Taurine and hypotaurine metabolism (ko00430);; Cyanoamino acid metabolism (ko00460);; Glutathione metabolism (ko00480);; Arachidonic acid metabolism (ko00590)
gene_Bol033289	13.6169	16.1304	20.2294	6.37075	10.2046	7.83097	0.00237153	-0.944305	down	K00799|3.5e-70|bna:106446969|K00799 glutathione S-transferase [EC:2.5.1.18] | (RefSeq) glutathione S-transferase U4	Glutathione metabolism (ko00480)
gene_Bol011217	59.7756	57.0895	33.802	120.842	85.3387	152.783	9.26e-05	1.37786	up	K13051|1.2e-183|bna:106397932|K13051 L-asparaginase / beta-aspartyl-peptidase [EC:3.5.1.1 3.4.19.5] | (RefSeq) probable isoaspartyl peptidase/L-asparaginase 2	Alanine, aspartate and glutamate metabolism (ko00250);; Cyanoamino acid metabolism (ko00460)
gene_Bol033337	8.36331	4.08528	4.93862	12.3859	10.4452	11.3463	0.00128096	1.08461	up	K15078|9.4e-44|bna:106348406|K15078 structure-specific endonuclease subunit SLX1 [EC:3.6.1.-] | (RefSeq) uncharacterized protein LOC106348406	--
gene_Bol014258	2.42893	0.968458	1.98878	4.15485	6.50916	1.78603	0.0141215	1.26499	up	K00279|1.9e-308|boe:106324800|K00279 cytokinin dehydrogenase [EC:1.5.99.12] | (RefSeq) cytokinin dehydrogenase 3	Zeatin biosynthesis (ko00908)
Brassica_oleracea_newGene_7182	2.34067	2.46492	1.55185	11.875	16.4014	1.459	0.000962928	2.23709	up	--	--
gene_Bol010323	15.3233	14.5566	7.17915	27.7233	12.4667	30.491	0.0205217	1.06509	up	K10355|1.0e-218|bna:106452521|K10355 actin, other eukaryote | (RefSeq) actin-11	--
gene_Bol038220	3.96866	1.17102	1.34262	5.93041	3.67206	5.29866	0.0132738	1.32227	up	K08202|1.1e-58|sot:102578486|K08202 MFS transporter, OCT family, solute carrier family 22 (organic cation transporter), member 4/5 | (RefSeq) organic cation/carnitine transporter 4-like	--
gene_Bol012314	35.0161	32.5732	40.1276	18.7652	20.6155	19.5413	8.94e-05	-0.767572	down	--	--
gene_Bol021475	5.74416	6.39549	11.0964	3.41582	5.91624	3.89417	0.0401193	-0.723989	down	K06943|1.5e-248|boe:106296920|K06943 nucleolar GTP-binding protein | (RefSeq) nucleolar GTP-binding protein 1-like	Ribosome biogenesis in eukaryotes (ko03008)
gene_Bol033758	21.6119	22.5792	50.2592	12.4369	17.2072	14.0751	0.00468441	-1.01155	down	K00811|7.2e-256|bna:106453582|K00811 aspartate aminotransferase, chloroplastic [EC:2.6.1.1] | (RefSeq) aspartate aminotransferase, chloroplastic-like	Arginine biosynthesis (ko00220);; Alanine, aspartate and glutamate metabolism (ko00250);; Cysteine and methionine metabolism (ko00270);; Arginine and proline metabolism (ko00330);; Tyrosine metabolism (ko00350);; Phenylalanine metabolism (ko00360);; Phenylalanine, tyrosine and tryptophan biosynthesis (ko00400);; Isoquinoline alkaloid biosynthesis (ko00950);; Tropane, piperidine and pyridine alkal…
gene_Bol030079	8.96065	11.9499	5.73096	13.5851	12.0154	22.843	0.0244184	0.985239	up	--	--
gene_Bol007095	3.1747	5.40249	5.24865	1.84263	1.13158	1.78236	0.00523053	-1.41194	down	K17471|1.2e-89|bna:106380747|K17471 sulfate transporter 3 | (RefSeq) probable sulfate transporter 3.5	--
gene_Bol023744	39.5162	44.3435	52.1893	24.2248	38.2259	20.5853	0.0065079	-0.638245	down	K00053|0.0e+00|boe:106300546|K00053 ketol-acid reductoisomerase [EC:1.1.1.86] | (RefSeq) ketol-acid reductoisomerase, chloroplastic	Valine, leucine and isoleucine biosynthesis (ko00290);; Pantothenate and CoA biosynthesis (ko00770);; 2-Oxocarboxylic acid metabolism (ko01210);; Biosynthesis of amino acids (ko01230)
gene_Bol044427	4.1645	5.53193	7.69278	3.61634	2.89099	3.40888	0.0470958	-0.698313	down	K01757|5.8e-57|crb:111828550|K01757 strictosidine synthase [EC:4.3.3.2] | (RefSeq) protein STRICTOSIDINE SYNTHASE-LIKE 12-like	Indole alkaloid biosynthesis (ko00901)
Brassica_oleracea_newGene_6105	2.78604	4.12233	2.96258	9.84714	11.2232	3.53108	0.000318569	1.68556	up	K10398|2.4e-35|eus:EUTSA_v10016147mg|K10398 kinesin family member 11 | (RefSeq) hypothetical protein	--
Brassica_oleracea_newGene_8560	2.29628	1.38457	2.1024	0.457631	1.21607	0.650127	0.0146685	-1.1614	down	K00895|3.3e-95|bna:106373279|K00895 diphosphate-dependent phosphofructokinase [EC:2.7.1.90] | (RefSeq) pyrophosphate--fructose 6-phosphate 1-phosphotransferase subunit beta 1-like	Glycolysis / Gluconeogenesis (ko00010);; Pentose phosphate pathway (ko00030);; Fructose and mannose metabolism (ko00051)
gene_Bol044030	107.66	122.025	74.0636	171.682	156.421	165.923	0.00160578	0.803548	up	K14496|5.6e-115|bna:106440679|K14496 abscisic acid receptor PYR/PYL family | (RefSeq) abscisic acid receptor PYL5	MAPK signaling pathway - plant (ko04016);; Plant hormone signal transduction (ko04075)
gene_Bol004691	25.2598	24.9234	31.0475	15.3281	19.7748	14.4767	0.000185685	-0.622356	down	K00924|1.5e-282|han:110910940|K00924 kinase [EC:2.7.1.-] | (RefSeq) receptor protein kinase TMK1-like	--
gene_Bol045823	136.447	74.6314	110.839	424.626	84.7677	301.707	0.00478545	1.48364	up	K13065|4.5e-61|dzi:111277822|K13065 shikimate O-hydroxycinnamoyltransferase [EC:2.3.1.133] | (RefSeq) vinorine synthase-like	Phenylpropanoid biosynthesis (ko00940);; Flavonoid biosynthesis (ko00941);; Stilbenoid, diarylheptanoid and gingerol biosynthesis (ko00945)
gene_Bol006115	7.83266	13.1482	12.2707	3.45345	5.64041	1.66169	0.000352349	-1.57224	down	K08235|7.1e-172|bna:106435143|K08235 xyloglucan:xyloglucosyl transferase [EC:2.4.1.207] | (RefSeq) xyloglucan endotransglucosylase/hydrolase protein 9	--
gene_Bol014266	6.0588	6.59506	11.4876	1.98215	5.29187	2.01632	0.00486453	-1.30701	down	K09184|6.7e-08|dcr:108218750|K09184 GATA-binding protein, other eukaryote | (RefSeq) GATA transcription factor 8-like isoform X1	--
gene_Bol037355	23.3006	24.2361	18.0963	29.3949	44.1446	33.1123	0.000356099	0.785517	up	K00521|1.1e-36|cmos:111447866|K00521 ferric-chelate reductase [EC:1.16.1.7] | (RefSeq) ferric reduction oxidase 7, chloroplastic-like	--
gene_Bol042470	3.86591	4.83655	5.77018	1.55372	3.05005	1.48762	0.00767663	-1.15391	down	--	--
gene_Bol030273	45.0185	52.1372	32.0216	71.1681	49.3027	66.3161	0.0293718	0.643948	up	K08726|9.9e-07|cmax:111482470|K08726 soluble epoxide hydrolase / lipid-phosphate phosphatase [EC:3.3.2.10 3.1.3.76] | (RefSeq) uncharacterized protein LOC111482470 isoform X1	Arachidonic acid metabolism (ko00590);; Peroxisome (ko04146)
gene_Bol017670	10.4757	10.022	6.03672	16.2314	16.6111	14.5493	0.000891484	0.929767	up	K24139|3.3e-220|bna:106395210|K24139 auxin efflux carrier family protein | (RefSeq) protein PIN-LIKES 5-like	--
gene_Bol035230	21.9435	8.10498	10.5795	55.2539	26.284	50.8203	4.84e-05	1.84044	up	K06617|3.0e-251|bna:106418461|K06617 raffinose synthase [EC:2.4.1.82] | (RefSeq) probable galactinol--sucrose galactosyltransferase 1	Galactose metabolism (ko00052)
gene_Bol004371	23.4933	23.4949	31.1966	14.0541	11.5584	12.9565	0.00178819	-0.905388	down	--	--
Brassica_oleracea_newGene_5136	49.3623	39.5048	23.903	41.0394	81.4182	111.63	0.00959033	1.13257	up	K13065|3.1e-10|peq:110023591|K13065 shikimate O-hydroxycinnamoyltransferase [EC:2.3.1.133] | (RefSeq) LOW QUALITY PROTEIN: putrescine hydroxycinnamoyltransferase 1-like	Phenylpropanoid biosynthesis (ko00940);; Flavonoid biosynthesis (ko00941);; Stilbenoid, diarylheptanoid and gingerol biosynthesis (ko00945)
gene_Bol017533	4.2249	3.4439	16.5186	2.52813	3.04708	0.494201	0.016425	-1.89542	down	K20890|1.5e-82|bna:106361102|K20890 xylan alpha-glucuronosyltransferase [EC:2.4.1.-] | (RefSeq) UDP-glucuronate:xylan alpha-glucuronosyltransferase 2-like isoform X1	--
gene_Bol030662	5.78071	7.07766	7.71323	3.34844	3.36828	3.02	0.000211592	-0.973838	down	K08238|1.1e-185|bna:106388607|K08238 xyloglucan 6-xylosyltransferase [EC:2.4.2.39] | (RefSeq) xyloglucan 6-xylosyltransferase 2	--
gene_Bol013252	53.5712	50.6258	43.8858	32.1891	20.8206	31.5041	0.0125339	-0.687741	down	K00058|0.0e+00|bna:106358583|K00058 D-3-phosphoglycerate dehydrogenase / 2-oxoglutarate reductase [EC:1.1.1.95 1.1.1.399] | (RefSeq) D-3-phosphoglycerate dehydrogenase 2, chloroplastic	Glycine, serine and threonine metabolism (ko00260);; Cysteine and methionine metabolism (ko00270);; Carbon metabolism (ko01200);; Biosynthesis of amino acids (ko01230)
gene_Bol020988	32.5971	41.5447	14.0544	77.4292	28.8178	124.599	0.00732593	1.53878	up	K08235|1.4e-172|boe:106314289|K08235 xyloglucan:xyloglucosyl transferase [EC:2.4.1.207] | (RefSeq) probable xyloglucan endotransglucosylase/hydrolase protein 18	--
gene_Bol026295	3.11498	4.57377	6.33875	1.52838	3.31773	1.01655	0.0128492	-1.20161	down	--	--
gene_Bol042895	8.68709	11.5128	8.92508	19.2092	10.8028	18.5261	0.0158371	0.85887	up	K20660|4.2e-144|bna:111207878|K20660 cytochrome P450 family 709 | (RefSeq) cytochrome P450 709B3-like	--
gene_Bol009551	5.09412	12.6221	6.17574	16.5023	11.4147	17.9479	0.0199353	1.04924	up	K01510|1.3e-32|peq:110028934|K01510 apyrase [EC:3.6.1.5] | (RefSeq) probable apyrase 6 isoform X1	Purine metabolism (ko00230);; Pyrimidine metabolism (ko00240)
gene_Bol018760	1.80183	2.15626	1.24082	2.21712	4.5634	2.31631	0.0291518	0.869217	up	K13457|2.2e-45|gmx:100787762|K13457 disease resistance protein RPM1 | (RefSeq) disease resistance protein RPM1	Plant-pathogen interaction (ko04626)
gene_Bol022878	18.9749	16.4031	17.3135	26.102	21.6758	28.6387	0.00918381	0.652682	up	K20725|5.1e-119|bna:106389227|K20725 MAP kinase substrate 1 | (RefSeq) protein MKS1	MAPK signaling pathway - plant (ko04016)
gene_Bol008622	1.39283	2.10164	1.80053	0.48937	0.322536	0.81962	0.00658353	-1.54783	down	K18881|3.6e-222|bna:106410448|K18881 D-lactate dehydratase [EC:4.2.1.130] | (RefSeq) DJ-1 protein homolog F	Pyruvate metabolism (ko00620)
gene_Bol022805	1.01197	1.37444	1.68467	3.77024	1.86998	10.41	0.00242359	2.13353	up	--	--
gene_Bol038365	10.3136	8.69734	8.32031	4.94869	6.78206	4.08686	0.00879829	-0.702749	down	K15128|6.3e-140|bna:106390770|K15128 mediator of RNA polymerase II transcription subunit 6 | (RefSeq) mediator of RNA polymerase II transcription subunit 6-like	--
gene_Bol039697	0.894733	1.28818	0.989409	1.55513	1.73293	1.806	0.0460993	0.776241	up	--	--
gene_Bol030452	14.8254	28.8497	15.0699	39.7148	28.394	38.8562	0.00572777	0.97303	up	K22733|3.6e-106|cit:102612526|K22733 magnesium transporter | (RefSeq) uncharacterized protein LOC102612526	--
gene_Bol032468	12.0579	9.60035	9.91633	2.9959	1.68253	1.64119	3.43e-09	-2.20558	down	K22596|9.1e-127|boe:106316472|K22596 gamma-glutamylcyclotransferase, plant [EC:4.3.2.9] | (RefSeq) putative glutathione-specific gamma-glutamylcyclotransferase 2	Glutathione metabolism (ko00480)
gene_Bol016516	52.5857	51.139	48.735	159.607	25.8846	155.797	0.0237672	1.32108	up	--	--
gene_Bol030534	6.66779	4.51498	8.67668	2.13118	4.44702	1.93927	0.00305301	-1.14814	down	K20770|2.7e-116|gab:108483715|K20770 (+)-delta-cadinene 8-hydroxylase [EC:1.14.-.-] | (RefSeq) flavonoid 3'-monooxygenase-like	--
gene_Bol014383	20.0121	11.3401	6.22381	73.731	21.2518	61.5148	0.000130685	2.19912	up	--	--
gene_Bol018079	5.07091	2.59828	3.18961	0.689955	2.39385	0.519478	0.00924098	-1.54895	down	K09843|4.3e-264|bna:111204767|K09843 (+)-abscisic acid 8'-hydroxylase [EC:1.14.14.137] | (RefSeq) abscisic acid 8'-hydroxylase 4	Carotenoid biosynthesis (ko00906)
Brassica_oleracea_newGene_5007	2.1537	1.6382	1.94406	3.55077	5.46722	3.95698	6.88e-07	1.27726	up	--	--
gene_Bol032297	6.07744	11.568	2.35182	19.638	6.74206	23.335	0.021299	1.4479	up	K00318|3.3e-286|boe:106315443|K00318 proline dehydrogenase [EC:1.5.5.2] | (RefSeq) proline dehydrogenase 1, mitochondrial-like	Arginine and proline metabolism (ko00330)
gene_Bol022568	3.64235	6.31291	4.07726	1.28727	1.76828	2.6478	0.0206904	-1.17404	down	K08064|1.1e-97|bna:106407676|K08064 nuclear transcription factor Y, alpha | (RefSeq) nuclear transcription factor Y subunit A-7	--
gene_Bol043255	32.6244	31.9757	55.876	16.4367	28.1063	22.6112	0.0125629	-0.747727	down	K03217|5.3e-268|boe:106306030|K03217 YidC/Oxa1 family membrane protein insertase | (RefSeq) ALBINO3-like protein 1, chloroplastic	Protein export (ko03060)
gene_Bol016454	1.17945	0.977076	0.727061	1.299	1.50219	1.90008	0.025411	0.81613	up	K03006|9.1e-185|adu:107466525|K03006 DNA-directed RNA polymerase II subunit RPB1 [EC:2.7.7.6] | (RefSeq) LOW QUALITY PROTEIN: DNA-directed RNA polymerase II subunit 1-like	RNA polymerase (ko03020)
gene_Bol040952	70.5998	49.0583	72.3024	18.342	57.852	24.3637	0.0260973	-0.874335	down	K16569|1.8e-22|sita:101783840|K16569 gamma-tubulin complex component 2 | (RefSeq) gamma-tubulin complex component 2	--
gene_Bol023398	1.70909	1.98594	3.11215	5.96935	2.4504	3.42503	0.0497849	0.918674	up	--	--
gene_Bol032322	157.791	165.341	55.243	251.538	177.059	394.383	0.00853756	1.25281	up	K22683|6.3e-17|mdm:103430646|K22683 aspartyl protease family protein [EC:3.4.23.-] | (RefSeq) protein ASPARTIC PROTEASE IN GUARD CELL 1	--
gene_Bol013948	71.4775	68.2498	44.8428	81.276	109.748	144.947	0.00205167	0.977187	up	K09490|0.0e+00|boe:106306139|K09490 endoplasmic reticulum chaperone BiP [EC:3.6.4.10] | (RefSeq) mediator of RNA polymerase II transcription subunit 37f	Protein export (ko03060);; Protein processing in endoplasmic reticulum (ko04141)
gene_Bol031545	276.119	251.968	132.701	494.8	280.137	585.846	0.0033701	1.17336	up	--	--
gene_Bol022148	77.7813	88.59	81.7535	133.831	99.7928	136.007	0.00384345	0.691183	up	K22733|2.7e-07|vvi:100244618|K22733 magnesium transporter | (RefSeq) uncharacterized LOC100244618	--
gene_Bol009729	12.7985	10.5444	6.51655	14.3702	13.9514	14.9207	0.0293941	0.637684	up	K13430|9.0e-56|cann:107847575|K13430 serine/threonine-protein kinase PBS1 [EC:2.7.11.1] | (RefSeq) serine/threonine-protein kinase PBS1	Plant-pathogen interaction (ko04626)
gene_Bol008838	2.2872	1.81807	1.29783	0.492411	0.339094	0.164131	6.43e-06	-2.32633	down	K00901|0.0e+00|bna:106384992|K00901 diacylglycerol kinase (ATP) [EC:2.7.1.107] | (RefSeq) diacylglycerol kinase 1-like	Glycerolipid metabolism (ko00561);; Glycerophospholipid metabolism (ko00564);; Phosphatidylinositol signaling system (ko04070)
gene_Bol028016	27.0271	32.3071	15.9924	45.0094	31.3902	39.0074	0.0308624	0.722117	up	K08726|2.0e-07|cmax:111482470|K08726 soluble epoxide hydrolase / lipid-phosphate phosphatase [EC:3.3.2.10 3.1.3.76] | (RefSeq) uncharacterized protein LOC111482470 isoform X1	Arachidonic acid metabolism (ko00590);; Peroxisome (ko04146)
gene_Bol045604	9.15655	11.524	14.9026	7.92558	6.47631	5.91236	0.043376	-0.700163	down	K02921|3.4e-46|aly:9312611|K02921 large subunit ribosomal protein L37Ae | (RefSeq) 60S ribosomal protein L37a-2	Ribosome (ko03010)
gene_Bol026859	44.7326	62.2906	47.8143	22.258	29.0468	40.3794	0.0399097	-0.641135	down	K03444|1.1e-246|boe:106343384|K03444 MFS transporter, SP family, ERD6-like sugar transporter | (RefSeq) sugar transporter ERD6-like 4	--
gene_Bol033310	2.082	1.45699	1.40592	2.41655	2.73903	2.96197	0.0174309	0.824224	up	K20716|3.4e-59|mesc:110629620|K20716 mitogen-activated protein kinase kinase kinase 17/18 | (RefSeq) mitogen-activated protein kinase kinase kinase 18-like	MAPK signaling pathway - plant (ko04016)
gene_Bol014038	34.2194	23.6202	27.3963	14.7517	26.2943	10.027	0.0346844	-0.678506	down	K00036|0.0e+00|bna:106418922|K00036 glucose-6-phosphate 1-dehydrogenase [EC:1.1.1.49 1.1.1.363] | (RefSeq) glucose-6-phosphate 1-dehydrogenase 1, chloroplastic	Pentose phosphate pathway (ko00030);; Glutathione metabolism (ko00480);; Carbon metabolism (ko01200)
Brassica_oleracea_newGene_319	9.94214	5.78669	5.97137	12.8409	11.2392	7.73599	0.0205085	0.599721	up	--	--
gene_Bol044004	24.1633	26.4182	17.7064	33.6797	26.722	35.7709	0.028088	0.606912	up	K13493|1.0e-254|bna:106432180|K13493 cytokinin-N-glucosyltransferase [EC:2.4.1.-] | (RefSeq) UDP-glycosyltransferase 76C2	Zeatin biosynthesis (ko00908)
gene_Bol040145	118.35	80.3183	75.2916	152.039	331.695	164.885	3.02e-05	1.30925	up	K00318|2.0e-272|bna:106407611|K00318 proline dehydrogenase [EC:1.5.5.2] | (RefSeq) proline dehydrogenase 2, mitochondrial	Arginine and proline metabolism (ko00330)
gene_Bol027868	52.6106	52.9117	63.609	38.0238	30.9816	33.482	0.00373905	-0.61375	down	K02880|1.0e-93|bna:106410829|K02880 large subunit ribosomal protein L17e | (RefSeq) 60S ribosomal protein L17-2	Ribosome (ko03010)
gene_Bol038968	60.0839	41.0941	56.9343	49.4186	95.7694	79.3655	0.0306567	0.600836	up	K02705|0.0e+00|bna:111205509|K02705 photosystem II CP43 chlorophyll apoprotein | (RefSeq) LOW QUALITY PROTEIN: uncharacterized protein LOC111205509	Photosynthesis (ko00195)
gene_Bol006999	842.812	810.267	848.129	527.956	386.827	500.468	0.00134806	-0.705334	down	K03781|1.9e-302|bna:106358221|K03781 catalase [EC:1.11.1.6] | (RefSeq) catalase-3-like	Tryptophan metabolism (ko00380);; Glyoxylate and dicarboxylate metabolism (ko00630);; Carbon metabolism (ko01200);; MAPK signaling pathway - plant (ko04016);; Peroxisome (ko04146)
gene_Bol030167	9.83851	12.7228	19.298	6.52097	10.4492	7.84661	0.0462669	-0.661236	down	K10669|5.4e-116|bna:106396108|K10669 2'-phosphotransferase [EC:2.7.1.160] | (RefSeq) tRNA 2'-phosphotransferase 1 isoform X1	--
gene_Bol021790	207.709	225.472	161.315	214.289	524.863	328.946	0.00379246	0.916319	up	K24345|4.4e-68|boe:106337258|K24345 calcium-binding protein KIC and related proteins | (RefSeq) calcium-binding protein KIC-like	--
gene_Bol013149	9.36724	8.47908	9.29752	4.74722	6.07953	5.8707	0.00637298	-0.599024	down	K20783|2.3e-232|boe:106311990|K20783 arabinosyltransferase [EC:2.4.2.-] | (RefSeq) uncharacterized protein LOC106311990	Other types of O-glycan biosynthesis (ko00514)
gene_Bol015928	153.318	165.813	129.132	234.108	141.909	249.838	0.0477227	0.607439	up	K00232|0.0e+00|boe:106336151|K00232 acyl-CoA oxidase [EC:1.3.3.6] | (RefSeq) acyl-coenzyme A oxidase 2, peroxisomal	Fatty acid degradation (ko00071);; beta-Alanine metabolism (ko00410);; alpha-Linolenic acid metabolism (ko00592);; Propanoate metabolism (ko00640);; Biosynthesis of unsaturated fatty acids (ko01040);; Carbon metabolism (ko01200);; Fatty acid metabolism (ko01212);; Peroxisome (ko04146)
gene_Bol032238	34.6333	46.8484	74.7846	31.8603	21.6889	27.7921	0.0157813	-0.823047	down	--	--
gene_Bol006742	27.4067	21.4208	19.2071	35.8843	24.9233	35.3242	0.0300602	0.61724	up	K22733|1.1e-181|bna:106420589|K22733 magnesium transporter | (RefSeq) probable magnesium transporter NIPA6	--
gene_Bol038952	67.2506	36.6681	267.237	27.2512	28.9853	41.1854	0.00418171	-1.7908	down	--	--
gene_Bol013759	15.3877	9.17452	10.3127	19.1979	16.2853	18.3194	0.00632081	0.737825	up	--	--
gene_Bol013915	2.54169	2.78014	2.94807	1.57654	1.15527	0.589055	0.0124628	-1.21533	down	--	--
gene_Bol044510	22.2314	29.5401	25.8503	12.6273	13.8396	16.5732	0.00217966	-0.741895	down	K00297|0.0e+00|boe:106311545|K00297 methylenetetrahydrofolate reductase (NADPH) [EC:1.5.1.20] | (RefSeq) methylenetetrahydrofolate reductase 1	One carbon pool by folate (ko00670);; Carbon metabolism (ko01200)
gene_Bol005225	17.8975	17.6212	16.7229	30.0355	28.229	24.34	7.15e-05	0.756702	up	--	--
gene_Bol013541	5.86787	5.73415	3.62609	7.02572	7.83056	10.3502	0.0144941	0.837432	up	K14709|2.0e-214|boe:106297477|K14709 solute carrier family 39 (zinc transporter), member 1/2/3 | (RefSeq) zinc transporter 9	--
gene_Bol030269	1.80799	1.38121	1.99444	2.07343	4.02431	2.5623	0.0138499	0.820236	up	--	--
Brassica_oleracea_newGene_6286	0.212636	0.522469	0.028678	0.256602	0.846644	2.02473	0.0438554	2.09092	up	--	--
gene_Bol012209	22.0177	30.2256	11.6783	50.6635	31.1124	51.3289	0.00541705	1.17407	up	K14504|7.3e-101|boe:106318388|K14504 xyloglucan:xyloglucosyl transferase TCH4 [EC:2.4.1.207] | (RefSeq) xyloglucan endotransglucosylase/hydrolase protein 22	Plant hormone signal transduction (ko04075)
gene_Bol022125	18.1076	21.8538	36.4597	12.0104	10.6835	5.06621	0.000233507	-1.37804	down	K00036|0.0e+00|boe:106311782|K00036 glucose-6-phosphate 1-dehydrogenase [EC:1.1.1.49 1.1.1.363] | (RefSeq) glucose-6-phosphate 1-dehydrogenase 4, chloroplastic	Pentose phosphate pathway (ko00030);; Glutathione metabolism (ko00480);; Carbon metabolism (ko01200)
gene_Bol014145	5.1833	5.6612	3.89606	7.21623	7.78928	8.63598	0.00317446	0.782913	up	K09338|5.4e-97|brp:103838097|K09338 homeobox-leucine zipper protein | (RefSeq) LOW QUALITY PROTEIN: homeobox-leucine zipper protein HAT7	--
gene_Bol024701	10.5349	10.5846	3.78401	14.7311	18.8125	17.1794	0.00691613	1.11514	up	K05387|5.0e-172|boe:106326730|K05387 glutamate receptor, ionotropic, plant | (RefSeq) glutamate receptor 2.5-like isoform X1	--
gene_Bol010926	2.28791	1.05921	7.63738	0.467075	0.465419	0.579841	0.000367956	-2.68788	down	K21484|2.3e-190|bna:106346584|K21484 benzoate/salicylate 1-O-methyltransferase [EC:2.1.1.273 2.1.1.274] | (RefSeq) salicylate/benzoate carboxyl methyltransferase-like	--
Brassica_oleracea_newGene_3460	3.15479	3.80317	0.661907	13.0037	6.61992	1.27543	0.0467133	1.5397	up	--	--
gene_Bol013783	169.373	103.547	70.7382	245.506	222.055	248.392	0.000440218	1.16763	up	K05350|7.7e-206|bna:106376873|K05350 beta-glucosidase [EC:3.2.1.21] | (RefSeq) beta-glucosidase 46-like	Cyanoamino acid metabolism (ko00460);; Starch and sucrose metabolism (ko00500);; Phenylpropanoid biosynthesis (ko00940)
Brassica_oleracea_newGene_6352	1.4814	2.30594	2.52372	3.38232	5.56144	4.03279	0.00854894	1.11548	up	--	--
gene_Bol041115	5.53612	3.18249	6.48986	2.31521	3.60211	1.84789	0.0183149	-0.886479	down	K22950|6.5e-122|fve:101295404|K22950 acylphloroglucinol glucosyltransferase [EC:2.4.1.358] | (RefSeq) anthocyanidin 3-O-glucosyltransferase 2-like	--
gene_Bol025231	7.95273	6.71559	8.7757	30.533	9.3723	21.7562	0.000600949	1.5333	up	K17500|3.0e-45|nto:104085001|K17500 integrin-linked kinase-associated serine/threonine phosphatase 2C [EC:3.1.3.16] | (RefSeq) WAT1-related protein At3g18200 isoform X1	--
gene_Bol019399	117.308	137.234	102.234	195.686	159.598	195.208	0.00159948	0.735304	up	K10523|5.3e-07|ppp:112282598|K10523 speckle-type POZ protein | (RefSeq) BTB/POZ domain-containing protein At3g56230-like	--
gene_Bol029505	0.948857	0.434037	0.22783	6.93211	0.514518	3.29292	0.000892812	2.8625	up	K19525|4.7e-07|olu:OSTLU_27430|K19525 vacuolar protein sorting-associated protein 13A/C | (RefSeq) predicted protein	--
gene_Bol043761	65.0337	34.2913	83.0507	28.8323	49.5277	18.9295	0.0297984	-0.839515	down	K14209|4.9e-08|dosa:Os04t0565500-01|K14209 solute carrier family 36 (proton-coupled amino acid transporter) | (RefSeq) Os04g0565500; Similar to OSIGBa0158F05.8 protein.	--
gene_Bol035231	17.4124	6.29484	9.46101	37.2086	19.5144	43.4506	0.000256406	1.73684	up	K06617|3.2e-100|bna:106418461|K06617 raffinose synthase [EC:2.4.1.82] | (RefSeq) probable galactinol--sucrose galactosyltransferase 1	Galactose metabolism (ko00052)
gene_Bol025012	15.2935	15.9231	15.2717	23.5684	29.5196	24.4085	1.71e-07	0.829684	up	K09562|3.9e-202|bna:106367858|K09562 hsp70-interacting protein | (RefSeq) nucleotide exchange factor SIL1	Protein processing in endoplasmic reticulum (ko04141)
gene_Bol026973	66.385	99.916	98.4494	42.4426	48.8798	45.9734	0.00017121	-0.849202	down	K03781|9.8e-299|bna:106347262|K03781 catalase [EC:1.11.1.6] | (RefSeq) catalase-3-like isoform X1	Tryptophan metabolism (ko00380);; Glyoxylate and dicarboxylate metabolism (ko00630);; Carbon metabolism (ko01200);; MAPK signaling pathway - plant (ko04016);; Peroxisome (ko04146)
gene_Bol012589	30.3209	25.1951	29.5527	15.6235	23.7326	13.1334	0.00524908	-0.618577	down	K20102|2.1e-212|brp:103831043|K20102 YTH domain-containing family protein | (RefSeq) YTH domain-containing protein ECT3 isoform X1	--
gene_Bol043231	2.78808	3.06071	2.19298	5.24678	2.87422	5.17401	0.0408014	0.843058	up	K09519|5.3e-201|bna:106401514|K09519 DnaJ homolog subfamily B member 13 | (RefSeq) protein psi1-like	--
gene_Bol024978	0.879856	1.29154	2.33485	0.358281	1.0754	0.210061	0.0492054	-1.41062	down	K19476|8.1e-26|cic:CICLE_v10026997mg|K19476 vacuolar protein sorting-associated protein IST1 | (RefSeq) hypothetical protein	Endocytosis (ko04144)
gene_Bol032953	15.6617	21.5562	33.0803	6.06199	12.8013	8.05348	0.000229759	-1.30384	down	K14638|4.4e-187|cmax:111493070|K14638 solute carrier family 15 (peptide/histidine transporter), member 3/4 | (RefSeq) protein NRT1/ PTR FAMILY 2.13-like	--
gene_Bol041365	2.16058	1.42355	2.26729	3.32162	4.09361	3.68324	0.0336959	1.00074	up	K11252|2.0e-60|bna:106405890|K11252 histone H2B | (RefSeq) histone H2B.7	--
gene_Bol014895	1.16858	1.15019	1.21201	0.574107	0.627428	0.33553	0.017432	-1.07476	down	K01426|1.1e-273|bna:106416484|K01426 amidase [EC:3.5.1.4] | (RefSeq) putative amidase C869.01	Arginine and proline metabolism (ko00330);; Phenylalanine metabolism (ko00360);; Tryptophan metabolism (ko00380)
gene_Bol009821	13.1966	11.4991	21.7021	6.68438	6.3247	7.38429	0.00309156	-1.06784	down	K14488|1.4e-70|bna:106414038|K14488 SAUR family protein | (RefSeq) auxin-responsive protein SAUR41-like	Plant hormone signal transduction (ko04075)
gene_Bol033016	0.84945	0.973861	1.57865	0.318731	0.183959	0	0.00570618	-2.64456	down	K14272|5.5e-278|boe:106296220|K14272 glutamate--glyoxylate aminotransferase [EC:2.6.1.4 2.6.1.2 2.6.1.44] | (RefSeq) LOW QUALITY PROTEIN: glutamate--glyoxylate aminotransferase 2	Arginine biosynthesis (ko00220);; Alanine, aspartate and glutamate metabolism (ko00250);; Glycine, serine and threonine metabolism (ko00260);; Glyoxylate and dicarboxylate metabolism (ko00630);; Carbon fixation in photosynthetic organisms (ko00710);; Carbon metabolism (ko01200);; 2-Oxocarboxylic acid metabolism (ko01210);; Biosynthesis of amino acids (ko01230)
Brassica_oleracea_newGene_5137	51.072	36.8686	23.2813	57.1724	98.1312	110.531	0.000185917	1.45742	up	K13065|7.3e-34|nsy:104228407|K13065 shikimate O-hydroxycinnamoyltransferase [EC:2.3.1.133] | (RefSeq) agmatine coumaroyltransferase-2-like	Phenylpropanoid biosynthesis (ko00940);; Flavonoid biosynthesis (ko00941);; Stilbenoid, diarylheptanoid and gingerol biosynthesis (ko00945)
Brassica_oleracea_newGene_9947	30.374	26.7686	24.2295	52.0732	29.9026	40.0906	0.0165693	0.70224	up	K12835|1.7e-25|cmax:111493042|K12835 ATP-dependent RNA helicase DDX42 [EC:3.6.4.13] | (RefSeq) DEAD-box ATP-dependent RNA helicase 24 isoform X1	Spliceosome (ko03040)
gene_Bol043823	10.8066	10.2159	10.822	6.95941	6.86483	5.35793	0.00238495	-0.635389	down	K13051|3.8e-179|boe:106318953|K13051 L-asparaginase / beta-aspartyl-peptidase [EC:3.5.1.1 3.4.19.5] | (RefSeq) isoaspartyl peptidase/L-asparaginase 1	Alanine, aspartate and glutamate metabolism (ko00250);; Cyanoamino acid metabolism (ko00460)
gene_Bol008588	3.01934	2.85045	2.33695	15.0381	2.5827	10.0913	0.00510464	1.88727	up	--	--
gene_Bol028189	0	0.097028	0.05894	7.65683	5.62344	6.80739	6.14e-09	6.74047	up	--	--
gene_Bol027306	25.0936	27.655	19.7534	9.75698	15.5484	13.4457	0.00258274	-0.812143	down	K17879|4.1e-123|boe:106342065|K17879 peroxisomal coenzyme A diphosphatase NUDT7 [EC:3.6.1.-] | (RefSeq) nudix hydrolase 22, chloroplastic	Peroxisome (ko04146)
gene_Bol033094	3.42087	3.96873	11.4659	2.21768	3.44907	0.569528	0.02589	-1.53109	down	K20628|1.2e-117|tcc:18594954|K20628 expansin | (RefSeq) expansin-A5	--
gene_Bol032653	45.6738	40.7769	21.7246	60.2938	50.9251	53.1001	0.0339083	0.70537	up	--	--
gene_Bol021574	1.03151	0.797487	0.959549	0.270291	0.535686	0.293107	0.020968	-1.22961	down	--	--
gene_Bol025590	13.1186	17.026	18.8776	7.94977	4.64721	6.38551	0.000142248	-1.24939	down	K00002|7.0e-167|bna:106433282|K00002 alcohol dehydrogenase (NADP+) [EC:1.1.1.2] | (RefSeq) aldo-keto reductase family 4 member C10	Glycolysis / Gluconeogenesis (ko00010);; Pentose and glucuronate interconversions (ko00040);; Glycerolipid metabolism (ko00561)
gene_Bol034564	5.09029	3.9364	6.07438	6.8558	8.86291	7.10138	0.0182365	0.694919	up	K15104|1.3e-101|bna:106434397|K15104 solute carrier family 25 (mitochondrial oxoglutarate transporter), member 11 | (RefSeq) mitochondrial dicarboxylate/tricarboxylate transporter DTC	--
gene_Bol012758	13.6012	12.4648	13.235	32.6684	37.4054	29.1733	5.07e-26	1.42849	up	--	--
gene_Bol029069	3.60831	2.26675	3.85059	4.64175	7.06054	7.28923	0.00510876	1.07105	up	--	--
gene_Bol025298	12.6633	6.21247	7.85795	17.7869	9.71385	16.8062	0.0413919	0.857431	up	--	--
gene_Bol022281	16.8229	25.0031	17.4421	32.131	30.525	25.1062	0.032657	0.655245	up	K03260|7.4e-08|pda:103710480|K03260 translation initiation factor 4G | (RefSeq) eukaryotic translation initiation factor-like	RNA transport (ko03013)
gene_Bol022441	6.27564	4.81671	10.3407	3.45089	4.30864	2.46876	0.0098794	-0.982052	down	--	--
gene_Bol015809	3.07552	1.81992	1.77674	4.01821	4.45642	2.44483	0.0301026	0.79136	up	K00423|0.0e+00|bna:106377433|K00423 L-ascorbate oxidase [EC:1.10.3.3] | (RefSeq) L-ascorbate oxidase homolog	Ascorbate and aldarate metabolism (ko00053)
gene_Bol024863	545.457	649.621	415.758	891.081	673.14	1075.22	0.00597938	0.832679	up	K01953|0.0e+00|bna:106352721|K01953 asparagine synthase (glutamine-hydrolysing) [EC:6.3.5.4] | (RefSeq) asparagine synthetase [glutamine-hydrolyzing]	Alanine, aspartate and glutamate metabolism (ko00250);; Biosynthesis of amino acids (ko01230)
gene_Bol029089	2.64851	1.96558	3.12576	0.822316	0.959091	1.26533	0.0170613	-1.20106	down	--	--
gene_Bol006047	43.2232	50.8802	65.7408	22.81	41.1624	34.2363	0.0276902	-0.608984	down	K08726|1.4e-125|cmax:111482470|K08726 soluble epoxide hydrolase / lipid-phosphate phosphatase [EC:3.3.2.10 3.1.3.76] | (RefSeq) uncharacterized protein LOC111482470 isoform X1	Arachidonic acid metabolism (ko00590);; Peroxisome (ko04146)
gene_Bol021292	16.2734	18.1386	10.3669	22.0732	22.0056	42.8845	0.00669961	1.08721	up	K01915|9.2e-214|boe:106320460|K01915 glutamine synthetase [EC:6.3.1.2] | (RefSeq) glutamine synthetase cytosolic isozyme 1-4-like	Arginine biosynthesis (ko00220);; Alanine, aspartate and glutamate metabolism (ko00250);; Glyoxylate and dicarboxylate metabolism (ko00630);; Nitrogen metabolism (ko00910);; Biosynthesis of amino acids (ko01230)
gene_Bol021244	2.48925	1.68591	1.41906	0.465396	0.512765	0.751858	0.00370211	-1.54039	down	K13379|7.4e-219|bna:106368228|K13379 reversibly glycosylated polypeptide / UDP-arabinopyranose mutase [EC:2.4.1.- 5.4.99.30] | (RefSeq) UDP-arabinopyranose mutase 2	Amino sugar and nucleotide sugar metabolism (ko00520)
gene_Bol012280	9.02694	7.89762	5.7318	11.0915	12.9346	9.20067	0.017347	0.637749	up	--	--
gene_Bol006111	0.696787	1.65539	0	4.37612	7.35025	1.73585	0.0197616	2.51997	up	K09841|1.4e-60|cann:107855067|K09841 xanthoxin dehydrogenase [EC:1.1.1.288] | (RefSeq) xanthoxin dehydrogenase-like	Carotenoid biosynthesis (ko00906)
gene_Bol015218	5.52726	5.72628	7.69923	3.07429	3.05668	3.69512	0.0042257	-0.832901	down	K19891|1.6e-66|eus:EUTSA_v10004013mg|K19891 glucan endo-1,3-beta-glucosidase 1/2/3 [EC:3.2.1.39] | (RefSeq) hypothetical protein	Starch and sucrose metabolism (ko00500)
Brassica_oleracea_newGene_4552	17.3438	8.49426	4.63973	18.0287	23.3364	14.0344	0.0406552	0.94095	up	--	--
gene_Bol013682	70.2019	64.9871	58.2712	96.3298	78.9904	100.749	0.00592062	0.626497	up	--	--
gene_Bol037756	52.1023	57.5626	39.8526	54.0115	157.089	99.5437	0.00291036	1.12393	up	--	--
Brassica_oleracea_newGene_11980	15.3765	20.7695	18.7015	6.89275	13.3991	5.30253	0.00202275	-1.04224	down	K01183|1.9e-161|boe:106331780|K01183 chitinase [EC:3.2.1.14] | (RefSeq) basic endochitinase CHB4-like	Amino sugar and nucleotide sugar metabolism (ko00520)
gene_Bol017005	137.152	164.194	232.922	87.9216	162.217	79.8367	0.0350725	-0.626075	down	K01444|2.6e-194|bna:106397569|K01444 N4-(beta-N-acetylglucosaminyl)-L-asparaginase [EC:3.5.1.26] | (RefSeq) probable isoaspartyl peptidase/L-asparaginase 3	Other glycan degradation (ko00511)
gene_Bol045881	18.6115	15.0005	25.3498	9.17372	15.1678	8.79602	0.0218416	-0.745271	down	--	--
gene_Bol037060	5.59089	3.87642	5.35961	3.08568	2.36819	1.36466	0.0424007	-1.01961	down	--	--
gene_Bol029987	30.2733	44.3403	81.4929	13.66	12.2041	16.4984	3.47e-06	-1.75873	down	--	--
Brassica_oleracea_newGene_6341	449.688	386.24	482.141	261.317	130.88	217.031	0.00126072	-0.977919	down	K01673|3.2e-147|boe:106304121|K01673 carbonic anhydrase [EC:4.2.1.1] | (RefSeq) beta carbonic anhydrase 3	Nitrogen metabolism (ko00910)
gene_Bol042522	24.2639	16.4792	22.7614	5.69432	4.10427	1.48688	5.18e-08	-2.40922	down	K22374|5.2e-37|aip:107609107|K22374 3''-deamino-3''-oxonicotianamine reductase [EC:1.1.1.285] | (RefSeq) NAD(P)H-dependent 6'-deoxychalcone synthase isoform X1	--
gene_Bol039850	76.3961	58.5047	43.9845	88.7185	105.301	94.6478	0.00159535	0.786962	up	--	--
gene_Bol039746	19.3339	14.4512	12.6494	24.8489	23.738	17.8941	0.0225164	0.61043	up	K13430|1.9e-17|soe:110775158|K13430 serine/threonine-protein kinase PBS1 [EC:2.7.11.1] | (RefSeq) probable serine/threonine-protein kinase PBL7 isoform X1	Plant-pathogen interaction (ko04626)
gene_Bol012514	18.1162	18.804	16.3464	21.2861	27.7083	31.9993	0.00448212	0.710861	up	K22856|2.4e-187|bna:106348576|K22856 EEF1A lysine methyltransferase 2 [EC:2.1.1.-] | (RefSeq) EEF1A lysine methyltransferase 2	--
gene_Bol026243	26.7804	41.4046	38.8279	27.1228	10.3532	14.1237	0.0263082	-0.936461	down	--	--
gene_Bol014466	7.94179	5.71052	6.58157	13.3241	13.713	5.55464	0.0289958	0.759567	up	K08857|1.6e-294|boe:106342499|K08857 NIMA (never in mitosis gene a)-related kinase 1/4/5 [EC:2.7.11.1] | (RefSeq) serine/threonine-protein kinase Nek4 isoform X1	--
gene_Bol045577	18.3715	8.69675	10.0553	25.8703	22.5018	29.1902	0.000521539	1.18216	up	--	--
Brassica_oleracea_newGene_2742	14.147	11.208	15.1487	4.92691	7.25239	3.33755	2.42e-06	-1.31017	down	K08176|3.7e-307|bna:106406370|K08176 MFS transporter, PHS family, inorganic phosphate transporter | (RefSeq) inorganic phosphate transporter 1-4-like isoform X1	--
gene_Bol037760	65.3618	68.9679	36.0523	88.1966	90.0394	114.509	0.00505526	0.889794	up	K10260|3.0e-14|cre:CHLREDRAFT_205525|K10260 F-box and WD-40 domain protein 7 | (RefSeq) predicted protein	Ubiquitin mediated proteolysis (ko04120)
Brassica_oleracea_newGene_8674	0.603072	0.637943	0.455971	1.22399	1.74809	0.625809	0.00236362	1.1411	up	K03006|2.2e-247|adu:107466525|K03006 DNA-directed RNA polymerase II subunit RPB1 [EC:2.7.7.6] | (RefSeq) LOW QUALITY PROTEIN: DNA-directed RNA polymerase II subunit 1-like	RNA polymerase (ko03020)
gene_Bol024291	9.50091	15.8687	8.41232	30.8079	8.65441	24.9292	0.0498161	1.06411	up	--	--
gene_Bol028369	6.92439	6.07615	7.11068	3.67226	4.43858	3.68728	0.000107868	-0.672006	down	K20798|0.0e+00|boe:106306076|K20798 small RNA 2'-O-methyltransferase [EC:2.1.1.-] | (RefSeq) small RNA 2'-O-methyltransferase	--
gene_Bol029066	21.3088	22.1215	27.6738	42.0172	49.4115	44.6307	2.58e-07	1.03568	up	K11297|8.5e-62|bna:106350664|K11297 high mobility group protein B4 | (RefSeq) high mobility group B protein 4	--
gene_Bol019759	1.55227	1.14568	1.65375	0.673445	0.697859	0.917949	0.0220833	-0.799789	down	--	--
gene_Bol027131	9.10642	7.86659	12.9112	3.48548	5.91906	3.89227	0.00176441	-1.07336	down	K13418|2.4e-17|ppp:112280412|K13418 somatic embryogenesis receptor kinase 1 [EC:2.7.10.1 2.7.11.1] | (RefSeq) LRR receptor kinase BAK1-like isoform X1	--
Brassica_oleracea_newGene_1456	4.32867	5.07704	3.53589	9.23112	7.14784	5.92505	0.00890366	0.874656	up	K13121|1.1e-43|bna:106398468|K13121 protein FRA10AC1 | (RefSeq) protein FRA10AC1 homolog	--
gene_Bol005100	1.68756	1.61492	1.81267	0.706307	1.02061	0.9548	0.000769994	-0.830269	down	K11000|0.0e+00|boe:106295022|K11000 callose synthase [EC:2.4.1.-] | (RefSeq) putative callose synthase 8	--
gene_Bol016391	0.526077	3.67963	6.05359	0.769451	0.248808	0	0.00553621	-3.20223	down	K12472|2.2e-27|bvg:104885038|K12472 epidermal growth factor receptor substrate 15 | (RefSeq) filaggrin-like	Endocytosis (ko04144)
Brassica_oleracea_newGene_5000	28.4669	27.9535	39.7829	13.819	22.6689	11.6716	0.000333697	-0.9299	down	K01322|3.0e-07|csat:104767606|K01322 prolyl oligopeptidase [EC:3.4.21.26] | (RefSeq) putative F-box/LRR-repeat protein At3g18150	--
Brassica_oleracea_newGene_8637	9.66677	3.00707	2.17903	10.9596	7.43492	10.8261	0.049669	1.05463	up	--	--
Brassica_oleracea_newGene_2752	18.1966	20.4024	21.6283	14.5225	14.1023	8.99426	0.0111648	-0.591455	down	K02893|6.6e-76|bna:106381739|K02893 large subunit ribosomal protein L23Ae | (RefSeq) 60S ribosomal protein L23a-1-like	Ribosome (ko03010)
gene_Bol014694	8.82252	6.30898	4.69236	15.7243	10.5487	12.6042	0.00153933	1.08133	up	K22683|5.1e-07|smo:SELMODRAFT_426333|K22683 aspartyl protease family protein [EC:3.4.23.-] | (RefSeq) hypothetical protein	--
gene_Bol040123	4.66628	5.46173	4.55477	4.84879	9.16027	8.78182	0.0409716	0.726085	up	--	--
gene_Bol025973	0.866795	0.896342	1.98016	0.512555	0.793028	0.252289	0.0452171	-1.17026	down	K01968|5.4e-28|psom:113350054|K01968 3-methylcrotonyl-CoA carboxylase alpha subunit [EC:6.4.1.4] | (RefSeq) LOW QUALITY PROTEIN: methylcrotonoyl-CoA carboxylase subunit alpha, mitochondrial-like	Valine, leucine and isoleucine degradation (ko00280)
gene_Bol024405	15.3915	17.512	14.0772	20.7273	20.0615	26.3852	0.0136987	0.627995	up	K09419|1.7e-221|boe:106307073|K09419 heat shock transcription factor, other eukaryote | (RefSeq) heat stress transcription factor A-4a-like	--
gene_Bol030476	2.61567	2.19165	1.52646	3.13757	4.77045	2.88201	0.0138483	0.843508	up	K23280|2.0e-302|bna:106424727|K23280 rhamnogalacturonan I rhamnosyltransferase [EC:2.4.1.351] | (RefSeq) BNAC09G42120D; uncharacterized protein At1g04910	--
gene_Bol031250	12.9061	11.9784	14.8035	5.58838	7.51419	4.32316	4.93e-06	-1.10079	down	K08669|1.0e-33|boe:106306356|K08669 HtrA serine peptidase 2 [EC:3.4.21.108] | (RefSeq) putative protease Do-like 14	--
gene_Bol028238	24.2306	32.0468	44.7716	13.0978	27.7105	19.1989	0.0389716	-0.668779	down	K04773|3.0e-17|mtr:MTR_5g082990|K04773 protease IV [EC:3.4.21.-] | (RefSeq) S49 protease IV family peptidase	--
Brassica_oleracea_newGene_3720	1.5873	3.59356	3.66453	0.927491	0.161942	0.321457	0.000274444	-2.50946	down	K01696|9.0e-279|boe:106295867|K01696 tryptophan synthase beta chain [EC:4.2.1.20] | (RefSeq) tryptophan synthase beta chain 1-like	Glycine, serine and threonine metabolism (ko00260);; Phenylalanine, tyrosine and tryptophan biosynthesis (ko00400);; Biosynthesis of amino acids (ko01230)
gene_Bol045172	91.9471	49.1334	76.5504	150.434	104.319	102.892	0.00496217	0.827416	up	K20279|6.2e-31|qsu:112002560|K20279 synaptojanin [EC:3.1.3.36] | (RefSeq) inositol-1,4,5-trisphosphate 5-phosphatase 1-like	Inositol phosphate metabolism (ko00562);; Phosphatidylinositol signaling system (ko04070)
gene_Bol016238	6.78747	2.93697	4.76375	33.0381	2.53659	23.3113	0.00293737	2.18447	up	K17500|2.6e-57|nto:104085001|K17500 integrin-linked kinase-associated serine/threonine phosphatase 2C [EC:3.1.3.16] | (RefSeq) WAT1-related protein At3g18200 isoform X1	--
Brassica_oleracea_newGene_2510	0.649573	0.490221	0.303927	0.918317	1.68323	0.523595	0.0253412	1.06009	up	K12447|1.4e-107|boe:106336398|K12447 UDP-sugar pyrophosphorylase [EC:2.7.7.64] | (RefSeq) uncharacterized protein LOC106336398	Pentose and glucuronate interconversions (ko00040);; Galactose metabolism (ko00052);; Ascorbate and aldarate metabolism (ko00053);; Amino sugar and nucleotide sugar metabolism (ko00520)
gene_Bol007609	2.42988	2.51199	0.640584	8.86108	2.50425	6.72666	0.00469715	1.81984	up	K14376|1.1e-272|bna:106401686|K14376 poly(A) polymerase [EC:2.7.7.19] | (RefSeq) nuclear poly(A) polymerase 3	mRNA surveillance pathway (ko03015)
Brassica_oleracea_newGene_1054	9.26475	14.8972	19.0508	35.0171	15.6185	44.5559	0.00585929	1.28336	up	--	--
gene_Bol017037	110.313	101.102	87.012	137.754	142.042	153.815	0.000870757	0.644924	up	K18211|7.1e-170|bna:106410999|K18211 synaptosomal-associated protein 25 | (RefSeq) SNAP25 homologous protein SNAP33	--
gene_Bol015434	12.0466	10.6596	9.71537	14.2254	16.5044	16.4651	0.00572874	0.641513	up	K20393|1.3e-111|bna:106427798|K20393 PRA1 family protein 3 | (RefSeq) PRA1 family protein A2	--
Brassica_oleracea_newGene_11196	1.11696	1.76541	2.72454	0.281648	0.192197	0.323996	1.14e-08	-2.7286	down	--	--
gene_Bol015926	1.57581	1.3992	0.893238	2.37201	2.79375	2.30954	0.00370493	1.03574	up	K24221|4.5e-92|lsv:111907353|K24221 type I inositol polyphosphate 5-phosphatase IP5P1/2 [EC:3.1.3.56] | (RefSeq) type I inositol polyphosphate 5-phosphatase 2-like isoform X1	Inositol phosphate metabolism (ko00562)
gene_Bol008104	0.30516	0.302476	0.230204	1.74334	1.39064	1.5852	7.88e-06	2.55746	up	K20858|1.4e-181|boe:106325948|K20858 calcium uniporter protein, mitochondrial | (RefSeq) calcium uniporter protein 3, mitochondrial-like	--
gene_Bol031975	2.33316	2.39329	1.98982	5.16527	3.04832	2.76654	0.0286042	0.811699	up	K13430|4.6e-59|sind:105168454|K13430 serine/threonine-protein kinase PBS1 [EC:2.7.11.1] | (RefSeq) serine/threonine-protein kinase PBS1	Plant-pathogen interaction (ko04626)
gene_Bol018715	29.2953	20.6018	25.7234	14.3497	12.8426	16.4618	0.00613488	-0.674389	down	K13412|1.3e-280|bna:111207874|K13412 calcium-dependent protein kinase [EC:2.7.11.1] | (RefSeq) calcium-dependent protein kinase 5-like	Plant-pathogen interaction (ko04626)
Brassica_oleracea_newGene_706	0.143627	0.372013	0.42495	1.15355	0.853653	0.936095	0.00199061	1.71476	up	--	--
gene_Bol030814	59.3616	62.2153	46.9928	81.7756	92.1283	99.1	0.000293179	0.798929	up	--	--
gene_Bol037134	16.2889	19.5741	25.6865	10.7802	12.7574	9.51654	0.00180196	-0.80293	down	K02877|1.8e-108|bna:106430358|K02877 large subunit ribosomal protein L15e | (RefSeq) 60S ribosomal protein L15-1	Ribosome (ko03010)
Brassica_oleracea_newGene_3567	0.267451	0.274704	0.316248	0.697926	0.338698	0.689851	0.0324367	1.1077	up	K14297|1.0e-17|nsy:104215433|K14297 nuclear pore complex protein Nup98-Nup96 | (RefSeq) flocculation protein FLO11-like isoform X1	RNA transport (ko03013)
gene_Bol031619	5.7333	5.81699	15.9781	2.61288	3.53672	1.5524	0.000411159	-1.74702	down	K16816|1.0e-10|olu:OSTLU_31875|K16816 patatin-like phospholipase domain-containing protein 2 [EC:3.1.1.3] | (RefSeq) predicted protein	Glycerolipid metabolism (ko00561)
Brassica_oleracea_newGene_1019	10.157	12.2418	12.0277	42.6324	9.0752	19.3388	0.014528	1.19582	up	K15255|5.7e-66|boe:106314194|K15255 ATP-dependent DNA helicase PIF1 [EC:3.6.4.12] | (RefSeq) uncharacterized protein LOC106314194	--
Brassica_oleracea_newGene_7127	9.40524	11.6235	5.04658	12.3696	19.6886	13.5829	0.00246066	0.911648	up	--	--
gene_Bol019733	14.3181	17.5347	22.1292	6.42597	9.29345	7.9791	2.36e-05	-1.09031	down	K12580|2.2e-83|aly:110227739|K12580 CCR4-NOT transcription complex subunit 3 | (RefSeq) myb-related protein 1-like isoform X1	RNA degradation (ko03018)
gene_Bol028995	84.2375	99.4403	56.1333	118.125	106.976	150.637	0.0156711	0.761003	up	--	--
Brassica_oleracea_newGene_7190	3.78995	2.22034	1.24646	6.67137	14.9036	8.45879	2.14e-06	2.09607	up	K00423|4.3e-101|atr:18448195|K00423 L-ascorbate oxidase [EC:1.10.3.3] | (RefSeq) L-ascorbate oxidase	Ascorbate and aldarate metabolism (ko00053)
gene_Bol011202	19.0255	22.5412	16.7927	35.7718	26.2221	22.4738	0.0185086	0.628691	up	K20416|9.9e-155|boe:106295907|K20416 palmitoyl-[glycerolipid] 7-desaturase [EC:1.14.19.42] | (RefSeq) palmitoyl-monogalactosyldiacylglycerol delta-7 desaturase, chloroplastic-like	--
gene_Bol008795	110.003	120.496	151.191	77.0577	65.1983	89.232	0.0152865	-0.601638	down	K02133|1.3e-312|boe:106335923|K02133 F-type H+-transporting ATPase subunit beta [EC:7.1.2.2] | (RefSeq) ATP synthase subunit beta-2, mitochondrial-like	Oxidative phosphorylation (ko00190)
gene_Bol042611	7.40933	10.3607	22.4723	8.03994	5.75024	5.46508	0.0402343	-0.949744	down	--	--
gene_Bol006569	3.76504	1.57417	3.6027	3.51038	36.9652	5.53674	0.00116081	2.36808	up	K16280|8.5e-15|psom:113329977|K16280 E3 ubiquitin-protein ligase RGLG [EC:2.3.2.27] | (RefSeq) E3 ubiquitin-protein ligase RGLG2-like isoform X1	--
gene_Bol043412	82.8323	101.818	55.1755	131.966	98.1029	120.731	0.0303847	0.655851	up	--	--
gene_Bol032350	11.8897	7.96502	14.5308	2.64397	9.10725	3.53138	0.0248565	-1.10792	down	--	--
gene_Bol016778	20.0119	18.398	27.7703	6.79542	19.2233	6.45951	0.0162448	-0.975774	down	K00899|4.1e-245|boe:106296525|K00899 5-methylthioribose kinase [EC:2.7.1.100] | (RefSeq) methylthioribose kinase	Cysteine and methionine metabolism (ko00270)
gene_Bol034453	21.1505	20.9347	28.9503	11.6137	22.0286	8.8274	0.0377691	-0.679302	down	K19041|1.8e-41|cmos:111459995|K19041 E3 ubiquitin-protein ligase RNF38/44 [EC:2.3.2.27] | (RefSeq) RING-H2 finger protein ATL52-like	--
gene_Bol044196	28.432	24.9719	8.28166	40.2246	34.3315	43.1831	0.0170492	1.04018	up	K07195|0.0e+00|boe:106336635|K07195 exocyst complex component 7 | (RefSeq) exocyst complex component EXO70A1	--
gene_Bol031419	2.18306	1.31471	0.650314	2.22135	3.39099	3.7683	0.0179828	1.26949	up	K20559|1.8e-100|crb:17884730|K20559 dihydrocamalexate/camalexin synthase [EC:1.14.19.52] | (RefSeq) bifunctional dihydrocamalexate synthase/camalexin synthase	MAPK signaling pathway - plant (ko04016)
gene_Bol038376	1.70051	1.25249	1.50096	2.55053	4.30875	2.93693	0.0266543	1.18622	up	K03238|8.2e-10|bna:106425722|K03238 translation initiation factor 2 subunit 2 | (RefSeq) eukaryotic translation initiation factor 2 subunit beta-like	RNA transport (ko03013)
gene_Bol022875	3.79769	3.40422	3.44846	4.01007	5.92873	5.20685	0.0289971	0.607779	up	K08867|5.4e-174|boe:106336203|K08867 WNK lysine deficient protein kinase [EC:2.7.11.1] | (RefSeq) probable serine/threonine-protein kinase WNK6	--
gene_Bol013256	27.0944	44.835	21.9975	54.2269	35.6074	74.0536	0.0238495	0.929465	up	K04077|2.6e-32|cmos:111455859|K04077 chaperonin GroEL | (RefSeq) chaperonin CPN60-like 2, mitochondrial	RNA degradation (ko03018)
Brassica_oleracea_newGene_8683	12.6008	6.08841	5.15044	15.8224	15.1328	14.9712	0.00999132	0.993066	up	K01537|1.5e-23|boe:106309389|K01537 P-type Ca2+ transporter type 2C [EC:7.2.2.10] | (RefSeq) calcium-transporting ATPase 4, endoplasmic reticulum-type-like	--
gene_Bol010308	5.90594	5.62699	5.80762	7.21683	12.8326	5.9507	0.0350502	0.64999	up	K14431|2.3e-174|boe:106295146|K14431 transcription factor TGA | (RefSeq) transcription factor TGA6 isoform X1	Plant hormone signal transduction (ko04075)
gene_Bol011591	29.7376	30.7179	50.8866	16.3058	25.5814	15.25	0.00234845	-0.879626	down	K00025|1.5e-186|bna:106424310|K00025 malate dehydrogenase [EC:1.1.1.37] | (RefSeq) malate dehydrogenase 1, cytoplasmic	Citrate cycle (TCA cycle) (ko00020);; Cysteine and methionine metabolism (ko00270);; Pyruvate metabolism (ko00620);; Glyoxylate and dicarboxylate metabolism (ko00630);; Carbon fixation in photosynthetic organisms (ko00710);; Carbon metabolism (ko01200)
gene_Bol008820	22.4697	16.894	18.2453	12.5196	9.5834	8.87776	0.00890367	-0.790996	down	K12859|3.1e-53|bna:106385071|K12859 U5 snRNP protein, DIM1 family | (RefSeq) thioredoxin-like protein YLS8	Spliceosome (ko03040)
gene_Bol036773	4.46586	4.42954	1.31982	4.99244	5.24735	9.87915	0.0437671	1.09956	up	K14209|1.0e-10|cqi:110682157|K14209 solute carrier family 36 (proton-coupled amino acid transporter) | (RefSeq) amino acid transporter AVT3C-like	--
Brassica_oleracea_newGene_4116	0.51351	4.32306	2.60249	6.20639	12.0977	3.90445	0.0262436	1.42217	up	--	--
gene_Bol029995	0.672407	2.08465	1.26635	2.61352	3.10965	2.2302	0.0291354	1.05588	up	K08150|2.9e-282|bna:106394816|K08150 MFS transporter, SP family, solute carrier family 2 (myo-inositol transporter), member 13 | (RefSeq) inositol transporter 1	--
gene_Bol005730	17.4008	13.4862	21.6836	8.41396	5.07976	6.39807	1.81e-05	-1.28239	down	K00924|2.4e-86|mus:103987754|K00924 kinase [EC:2.7.1.-] | (RefSeq) receptor-like protein kinase HSL1	--
gene_Bol021519	20.3395	19.6922	42.6572	12.6811	16.0458	17.507	0.03988	-0.724699	down	K20102|2.4e-292|bna:106405513|K20102 YTH domain-containing family protein | (RefSeq) YTH domain-containing family protein 2 isoform X1	--
Brassica_oleracea_newGene_9473	21.4552	14.1542	25.2564	22.8887	51.0477	28.6528	0.0122661	0.829186	up	--	--
gene_Bol008945	49.7825	52.522	72.9575	32.116	30.3195	32.6281	0.000531438	-0.772496	down	K03231|1.0e-257|bna:106346370|K03231 elongation factor 1-alpha | (RefSeq) elongation factor 1-alpha 1	RNA transport (ko03013)
gene_Bol025369	5.78723	5.09185	5.90197	2.82901	4.65605	1.79038	0.01342	-0.790109	down	K16278|0.0e+00|bna:106391559|K16278 E3 ubiquitin-protein ligase HOS1 [EC:2.3.2.27] | (RefSeq) E3 ubiquitin-protein ligase HOS1-like	--
gene_Bol023805	0.552529	0.768893	1.75208	0.053122	0.370056	0	0.0112915	-2.79567	down	K13422|1.5e-08|han:110878445|K13422 transcription factor MYC2 | (RefSeq) uncharacterized protein LOC110878445	MAPK signaling pathway - plant (ko04016);; Plant hormone signal transduction (ko04075)
gene_Bol039311	12.8291	16.0304	20.7825	5.08162	15.7066	5.25609	0.0452023	-0.883496	down	--	--
gene_Bol013240	3.68871	4.75596	10.644	3.27322	1.91641	2.33475	0.0142016	-1.21739	down	K19041|4.7e-24|ghi:107945712|K19041 E3 ubiquitin-protein ligase RNF38/44 [EC:2.3.2.27] | (RefSeq) probable E3 ubiquitin-protein ligase HIP1	--
gene_Bol021267	6.02598	7.01095	9.699	0.810641	1.825	0.938016	3.81e-08	-2.57018	down	--	--
gene_Bol035146	29.9317	26.6787	31.8549	45.407	54.1083	28.6617	0.00722026	0.613028	up	K00679|5.4e-36|cic:CICLE_v10027727mg|K00679 phospholipid:diacylglycerol acyltransferase [EC:2.3.1.158] | (RefSeq) hypothetical protein	Glycerolipid metabolism (ko00561)
gene_Bol041494	7.13713	5.43762	14.0687	4.42867	4.99956	1.73574	0.0211757	-1.16788	down	K01507|8.6e-128|bna:111203373|K01507 inorganic pyrophosphatase [EC:3.6.1.1] | (RefSeq) soluble inorganic pyrophosphatase 2-like isoform X1	Oxidative phosphorylation (ko00190)
gene_Bol029321	52.7435	26.3393	40.8121	64.3084	62.2887	46.2335	0.0274822	0.624783	up	K13464|7.3e-147|boe:106309789|K13464 jasmonate ZIM domain-containing protein | (RefSeq) protein TIFY 11A-like	Plant hormone signal transduction (ko04075)
gene_Bol022076	11.455	12.4266	10.8721	25.9319	15.7771	11.9812	0.0424302	0.719859	up	--	--
gene_Bol008488	12.2583	13.2737	13.4768	20.0708	15.5496	20.0573	0.0117788	0.626831	up	K15109|1.6e-166|bna:106411246|K15109 solute carrier family 25 (mitochondrial carnitine/acylcarnitine transporter), member 20/29 | (RefSeq) mitochondrial carnitine/acylcarnitine carrier-like protein	--
gene_Bol029830	5.93131	10.8501	3.25939	35.1623	9.88274	15.4039	0.0089073	1.69356	up	--	--
gene_Bol005308	7.47232	7.08179	7.2267	3.04744	3.84498	3.28192	0.000423289	-1.00181	down	K03064|1.4e-07|bna:106412168|K03064 26S proteasome regulatory subunit T4 | (RefSeq) 26S proteasome regulatory subunit S10B homolog B-like	Proteasome (ko03050)
gene_Bol013751	44.5426	36.2858	18.516	55.9547	59.9277	68.9124	0.00368077	1.001	up	K08472|0.0e+00|boe:106313096|K08472 mlo protein | (RefSeq) MLO-like protein 6	--
gene_Bol007350	0.42037	0.429028	1.23705	0.119455	0.152537	0.082383	0.000145528	-2.42297	down	K05665|0.0e+00|eus:EUTSA_v10019894mg|K05665 ATP-binding cassette, subfamily C (CFTR/MRP), member 1 [EC:7.6.2.3] | (RefSeq) hypothetical protein	ABC transporters (ko02010)
gene_Bol017622	13.3239	5.69665	7.0319	16.6704	13.3891	15.2747	0.0104223	0.913581	up	K00770|4.2e-25|ccav:112518315|K00770 1,4-beta-D-xylan synthase [EC:2.4.2.24] | (RefSeq) cellulose synthase-like protein D5	Amino sugar and nucleotide sugar metabolism (ko00520)
Brassica_oleracea_newGene_9268	0.457338	0.221409	0.035223	1.18715	0.399377	0.690945	0.0301672	1.74596	up	--	--
gene_Bol028980	1.82063	1.77536	1.09818	5.75716	3.27176	6.71977	0.000521926	1.85863	up	--	--
gene_Bol037159	3.2044	2.01369	1.62242	1.66867	6.76816	8.6702	0.0165121	1.42851	up	K16818|3.4e-92|csat:104784853|K16818 phospholipase A1 [EC:3.1.1.32] | (RefSeq) phospholipase A(1) DAD1, chloroplastic-like	Glycerophospholipid metabolism (ko00564);; alpha-Linolenic acid metabolism (ko00592)
gene_Bol011480	20.689	25.2992	11.8387	28.963	38.2367	42.6957	0.00310215	1.02592	up	K13425|2.7e-158|brp:103836885|K13425 WRKY transcription factor 22 | (RefSeq) WRKY22; WRKY transcription factor 22	MAPK signaling pathway - plant (ko04016);; Plant-pathogen interaction (ko04626)
gene_Bol036057	5.35284	5.20974	3.71335	2.59837	2.47354	3.18372	0.0470898	-0.674817	down	K17871|3.6e-11|pop:7497402|K17871 NADH:ubiquinone reductase (non-electrogenic) [EC:1.6.5.9] | (RefSeq) external alternative NAD(P)H-ubiquinone oxidoreductase B1, mitochondrial isoform X1	--
gene_Bol029161	17.8143	14.1775	27.2598	9.58911	16.5738	8.40302	0.0405581	-0.700133	down	K10525|4.2e-136|bna:106362074|K10525 allene oxide cyclase [EC:5.3.99.6] | (RefSeq) allene oxide cyclase 4, chloroplastic	alpha-Linolenic acid metabolism (ko00592)
gene_Bol024417	30.9271	42.813	28.034	48.5052	41.0683	57.1604	0.0260508	0.640774	up	K14502|1.3e-218|bna:106415975|K14502 protein brassinosteroid insensitive 2 [EC:2.7.11.1] | (RefSeq) shaggy-related protein kinase eta	Plant hormone signal transduction (ko04075)
gene_Bol018381	16.303	18.1442	11.8135	25.5544	19.4172	24.1371	0.0120681	0.688371	up	K08819|2.7e-67|mtr:MTR_2g090405|K08819 cyclin-dependent kinase 12/13 [EC:2.7.11.22 2.7.11.23] | (RefSeq) cyclin-dependent kinase	--
Brassica_oleracea_newGene_6986	0.676023	0.515163	1.17571	0.286585	0.22421	0.082754	0.0017134	-1.88063	down	K09338|3.2e-134|brp:103838097|K09338 homeobox-leucine zipper protein | (RefSeq) LOW QUALITY PROTEIN: homeobox-leucine zipper protein HAT7	--
gene_Bol043251	9.3685	9.76716	6.26588	10.9288	20.3614	9.52961	0.0373303	0.744188	up	K10251|1.5e-112|boe:106301906|K10251 17beta-estradiol 17-dehydrogenase / very-long-chain 3-oxoacyl-CoA reductase [EC:1.1.1.62 1.1.1.330] | (RefSeq) very-long-chain 3-oxoacyl-CoA reductase-like protein At1g24470	Fatty acid elongation (ko00062);; Biosynthesis of unsaturated fatty acids (ko01040);; Fatty acid metabolism (ko01212)
gene_Bol014833	26.8154	27.7413	16.8339	34.944	43.5018	44.8522	0.00225736	0.886281	up	--	--
gene_Bol013155	15.7798	15.8519	10.7507	21.673	22.8965	20.8765	0.00170669	0.722151	up	--	--
gene_Bol032241	7.35704	6.31439	5.99976	9.65856	11.6004	16.5787	0.000954522	1.0616	up	K20893|1.6e-117|pop:18104995|K20893 probable galacturonosyltransferase-like 1 [EC:2.4.1.-] | (RefSeq) probable galacturonosyltransferase-like 1	--
Brassica_oleracea_newGene_5843	7.33508	1.13523	3.75605	0	0.407411	1.08436	0.0111889	-2.84075	down	--	--
gene_Bol017635	1.25805	0.936083	0.95912	0.333367	0.512517	0.238397	0.0151792	-1.39837	down	--	--
gene_Bol045875	4.40512	2.81664	10.9029	1.49506	2.49966	1.81153	0.00515738	-1.53621	down	K00085|9.1e-133|pxb:103966946|K00085 aldose-6-phosphate reductase (NADPH2) [EC:1.1.1.200] | (RefSeq) NADP-dependent D-sorbitol-6-phosphate dehydrogenase	--
gene_Bol032911	30.1315	27.2102	15.2363	46.3487	49.998	47.9631	0.000465583	1.08856	up	--	--
gene_Bol037689	15.9295	10.1627	7.75772	25.0064	12.4072	78.2993	0.00169224	1.95193	up	K10775|0.0e+00|boe:106342153|K10775 phenylalanine ammonia-lyase [EC:4.3.1.24] | (RefSeq) phenylalanine ammonia-lyase 1	Phenylalanine metabolism (ko00360);; Phenylpropanoid biosynthesis (ko00940)
gene_Bol040200	21.759	20.0675	11.7605	26.6943	20.2093	32.5954	0.0479724	0.689965	up	K23408|4.3e-11|obr:102713458|K23408 cell division cycle-associated protein 7 | (RefSeq) cell division cycle-associated protein 7-like	--
gene_Bol034572	11.318	12.8555	8.9146	18.0893	15.5558	17.2704	0.00801292	0.725952	up	--	--
gene_Bol018049	3.80765	1.43474	3.48945	1.48501	0.591484	1.24891	0.032582	-1.25206	down	K18789|1.8e-76|cic:CICLE_v10010628mg|K18789 xylogalacturonan beta-1,3-xylosyltransferase [EC:2.4.2.41] | (RefSeq) hypothetical protein	--
gene_Bol006927	17.2798	16.3988	9.361	24.5412	25.1083	33.8368	0.00120612	1.06794	up	K01001|3.9e-235|boe:106336757|K01001 UDP-N-acetylglucosamine--dolichyl-phosphate N-acetylglucosaminephosphotransferase [EC:2.7.8.15] | (RefSeq) UDP-N-acetylglucosamine--dolichyl-phosphate N-acetylglucosaminephosphotransferase	N-Glycan biosynthesis (ko00510)
gene_Bol042357	3.08522	3.09603	2.46851	0.963818	0.894797	1.06718	0.00404458	-1.41809	down	--	--
gene_Bol021540	151.599	95.6041	258	72.786	92.3004	46.2498	0.00134918	-1.1745	down	K15815|0.0e+00|brp:103830506|K15815 lupeol synthase 2 [EC:5.4.99.39 5.4.99.40 5.4.99.41] | (RefSeq) amyrin synthase LUP2 isoform X1	Sesquiterpenoid and triterpenoid biosynthesis (ko00909)
gene_Bol029326	1.32034	3.07982	1.72507	0.221901	1.05085	0.086404	0.0155495	-2.12076	down	--	--
gene_Bol013293	1.23839	1.34686	0.607753	2.54336	3.18287	3.48497	0.000822225	1.60774	up	K00968|6.3e-171|bna:106372819|K00968 choline-phosphate cytidylyltransferase [EC:2.7.7.15] | (RefSeq) choline-phosphate cytidylyltransferase 2-like isoform X3	Phosphonate and phosphinate metabolism (ko00440);; Glycerophospholipid metabolism (ko00564)
gene_Bol044810	5.26615	5.40485	9.81497	0.740627	5.30886	1.43223	0.0251133	-1.41795	down	K02178|9.6e-275|bna:106413505|K02178 checkpoint serine/threonine-protein kinase [EC:2.7.11.1] | (RefSeq) mitotic checkpoint serine/threonine-protein kinase BUB1-like	--
gene_Bol032811	2.97619	3.80242	4.33839	7.36159	18.6275	10.9605	1.65e-05	1.79904	up	K14492|2.8e-74|bna:106362751|K14492 two-component response regulator ARR-A family | (RefSeq) two-component response regulator ARR5	Plant hormone signal transduction (ko04075)
gene_Bol043668	3.59887	3.83543	2.58983	6.02358	8.82847	4.46331	0.00133489	1.01403	up	K03327|2.5e-278|boe:106318809|K03327 multidrug resistance protein, MATE family | (RefSeq) protein TRANSPARENT TESTA 12-like	--
gene_Bol028769	10.9236	5.7002	11.4533	3.95199	7.54743	2.76379	0.0267092	-0.910138	down	K22389|2.7e-271|boe:106292554|K22389 phospholipase A1 [EC:3.1.1.32] | (RefSeq) phospholipase A(1) LCAT3	Glycerophospholipid metabolism (ko00564);; alpha-Linolenic acid metabolism (ko00592)
gene_Bol020121	6.46437	5.67761	4.39428	4.77796	48.545	9.40703	0.00605816	1.91986	up	K00430|1.1e-102|boe:106326133|K00430 peroxidase [EC:1.11.1.7] | (RefSeq) peroxidase 58-like	Phenylpropanoid biosynthesis (ko00940)
gene_Bol006313	1.76927	2.23861	1.56653	4.79373	4.98336	2.34528	0.000819957	1.18615	up	K00924|4.5e-29|dzi:111315285|K00924 kinase [EC:2.7.1.-] | (RefSeq) receptor protein kinase CLAVATA1-like	--
gene_Bol038536	5.36287	5.44217	9.49326	3.92997	4.45172	3.45398	0.0281304	-0.678357	down	K08202|7.1e-58|vvi:100265876|K08202 MFS transporter, OCT family, solute carrier family 22 (organic cation transporter), member 4/5 | (RefSeq) organic cation/carnitine transporter 4	--
Brassica_oleracea_newGene_329	2.23565	0.916916	1.06658	3.26035	2.92725	2.06971	0.0315176	1.01294	up	K13449|1.3e-90|bna:106386288|K13449 pathogenesis-related protein 1 | (RefSeq) pathogenesis-related protein 1-like	MAPK signaling pathway - plant (ko04016);; Plant hormone signal transduction (ko04075);; Plant-pathogen interaction (ko04626)
gene_Bol026114	7.15825	9.7389	15.5769	3.22812	5.77751	4.33851	0.00351495	-1.19196	down	K02723|1.2e-93|brp:103831199|K02723 photosystem II PsbY protein | (RefSeq) photosystem II core complex proteins psbY, chloroplastic	Photosynthesis (ko00195)
gene_Bol004611	1.25457	1.51438	1.25384	2.11095	3.62269	1.46492	0.0314944	0.897301	up	--	--
gene_Bol027051	0.588265	0.741283	0.294456	0.834143	2.38252	1.4255	0.00628835	1.55432	up	K22262|5.2e-108|qsu:112034235|K22262 WD repeat and FYVE domain-containing protein 3 | (RefSeq) protein SPIRRIG	--
gene_Bol039766	20.9938	7.0439	13.6712	10.0902	74.876	23.8622	0.024006	1.42075	up	--	--
gene_Bol009949	12.6416	13.3188	13.2815	5.48012	11.4338	5.4373	0.036073	-0.739266	down	K11253|1.4e-66|adu:107470357|K11253 histone H3 | (RefSeq) histone H3.2	--
gene_Bol042705	5.50017	5.23074	5.07146	1.8676	4.13964	1.18167	0.0485996	-1.0731	down	K18635|9.7e-40|bna:106396630|K18635 protein SPIRAL1 and related proteins | (RefSeq) protein SPIRAL1-like	--
gene_Bol026753	3.08544	2.4623	12.5486	1.37956	0.280948	1.62203	0.00610662	-2.25196	down	K06130|1.1e-142|bna:106403015|K06130 lysophospholipase II [EC:3.1.1.5] | (RefSeq) acyl-protein thioesterase 2-like	Glycerophospholipid metabolism (ko00564)
gene_Bol010715	0.994235	0.678169	0.732027	1.45569	1.69416	1.98387	0.033222	1.19771	up	K09422|1.7e-111|bna:106386103|K09422 transcription factor MYB, plant | (RefSeq) transcription factor MYB57	--
gene_Bol013489	17.9599	8.66597	14.0527	11.8539	40.5165	18.663	0.0451021	0.866745	up	K01188|4.3e-264|ath:AT2G32860|K01188 beta-glucosidase [EC:3.2.1.21] | (RefSeq) BGLU33; beta glucosidase 33	Cyanoamino acid metabolism (ko00460);; Starch and sucrose metabolism (ko00500);; Phenylpropanoid biosynthesis (ko00940)
gene_Bol013032	29.3616	25.8976	15.6893	41.713	30.3963	50.4105	0.00978178	0.910611	up	--	--
gene_Bol034849	10.365	6.75384	5.64692	13.0668	20.4727	16.0739	0.000265392	1.21088	up	K13459|3.3e-29|dzi:111275814|K13459 disease resistance protein RPS2 | (RefSeq) probable disease resistance protein At1g61300	Plant-pathogen interaction (ko04626)
gene_Bol012096	69.7392	59.2185	245.1	75.8935	60.1751	28.5671	0.0491074	-1.08987	down	--	--
gene_Bol007603	6.03372	5.51667	6.2936	14.0787	6.05434	11.08	0.0181047	0.930518	up	K09422|7.1e-162|boe:106293427|K09422 transcription factor MYB, plant | (RefSeq) transcription factor MYB108-like	--
gene_Bol016816	8.67146	10.3723	13.9091	2.841	7.94537	4.55365	0.0222465	-1.0166	down	--	--
Brassica_oleracea_newGene_11765	4.33296	5.4516	3.47666	7.91522	12.1864	5.1045	0.0129004	0.982665	up	--	--
gene_Bol035801	5.91234	10.9177	17.1374	6.7982	2.32827	5.35529	0.0355466	-1.08799	down	K13436|7.3e-21|brp:103844018|K13436 pto-interacting protein 1 [EC:2.7.11.1] | (RefSeq) PTI1-like tyrosine-protein kinase 1 isoform X1	Plant-pathogen interaction (ko04626)
gene_Bol007949	3.31746	2.52052	2.71638	1.21558	1.77142	1.17675	0.00561183	-0.943531	down	K02606|6.6e-224|bna:106349440|K02606 origin recognition complex subunit 4 | (RefSeq) origin of replication complex subunit 4	--
gene_Bol016118	106.903	99.8416	144.238	63.0077	77.6963	64.0535	0.000351875	-0.680203	down	K03234|0.0e+00|bna:106418012|K03234 elongation factor 2 | (RefSeq) elongation factor 2-like	--
gene_Bol023081	4.08058	5.14376	1.81095	9.59777	4.4045	10.4749	0.0143645	1.27366	up	K01280|3.2e-104|spen:107013676|K01280 tripeptidyl-peptidase II [EC:3.4.14.10] | (RefSeq) tripeptidyl-peptidase 2-like isoform X1	--
gene_Bol012772	64.735	69.4012	73.8091	41.1642	33.8285	33.1222	6.81e-06	-0.840284	down	K10752|1.4e-07|zju:107427343|K10752 histone-binding protein RBBP4 | (RefSeq) LOW QUALITY PROTEIN: WD-40 repeat-containing protein MSI3	--
gene_Bol043957	223.703	191.862	188.461	298.503	303.134	356.532	0.000109257	0.777003	up	K04077|6.3e-09|cmax:111488761|K04077 chaperonin GroEL | (RefSeq) LOW QUALITY PROTEIN: chaperonin CPN60-like 2, mitochondrial	RNA degradation (ko03018)
gene_Bol009895	1.36521	1.65582	1.85503	3.01859	3.18692	1.53689	0.0365348	0.741036	up	--	--
gene_Bol024873	2.65126	3.78834	2.62317	2.14268	26.7477	2.37173	0.0366344	1.76583	up	--	--
gene_Bol044567	0.171141	0.23052	0.082938	0.391189	0.374396	0.78365	0.00989163	1.74697	up	--	--
gene_Bol043746	898.808	790.666	620.89	1425.92	925.426	1436.85	0.00406394	0.835437	up	K00020|1.1e-13|mtr:MTR_8g088900|K00020 3-hydroxyisobutyrate dehydrogenase [EC:1.1.1.31] | (RefSeq) 6-phosphogluconate dehydrogenase-like protein	Valine, leucine and isoleucine degradation (ko00280)
Brassica_oleracea_newGene_5667	1818.26	1478.13	1632.4	1679.16	2342.7	2945.69	0.0216354	0.614748	up	--	--
gene_Bol036074	59.9218	63.8206	109.959	35.9361	60.96	25.7963	0.0105441	-0.862859	down	K00279|4.2e-308|bna:111213862|K00279 cytokinin dehydrogenase [EC:1.5.99.12] | (RefSeq) cytokinin dehydrogenase 7-like	Zeatin biosynthesis (ko00908)
gene_Bol020112	4.31863	4.0894	4.07921	6.84481	5.24926	6.15565	0.022886	0.655055	up	--	--
gene_Bol005738	4.58085	3.32872	9.38683	2.12754	1.75573	2.79045	0.0192826	-1.23077	down	K19040|5.8e-121|bna:106434815|K19040 E3 ubiquitin-protein ligase ATL10/75/76/77/78 [EC:2.3.2.27] | (RefSeq) E3 ubiquitin-protein ligase ATL76-like	--
gene_Bol033710	4.06594	2.39665	2.97234	1.25567	2.53337	0.750819	0.0364178	-0.997412	down	K19893|9.8e-283|boe:106301285|K19893 glucan endo-1,3-beta-glucosidase 5/6 [EC:3.2.1.39] | (RefSeq) glucan endo-1,3-beta-glucosidase 5-like	Starch and sucrose metabolism (ko00500)
gene_Bol027580	21.9293	30.3669	29.7515	9.51546	20.3671	10.0344	0.00190029	-0.975157	down	K18857|1.6e-224|bna:106392161|K18857 alcohol dehydrogenase class-P [EC:1.1.1.1] | (RefSeq) alcohol dehydrogenase class-P	Glycolysis / Gluconeogenesis (ko00010);; Fatty acid degradation (ko00071);; Tyrosine metabolism (ko00350);; alpha-Linolenic acid metabolism (ko00592)
gene_Bol012481	6.5938	7.62619	4.31033	8.21546	10.4472	9.80592	0.0371069	0.708474	up	K03357|1.4e-107|bna:106348236|K03357 anaphase-promoting complex subunit 10 | (RefSeq) anaphase-promoting complex subunit 10	Ubiquitin mediated proteolysis (ko04120)
gene_Bol005479	42.0888	43.3782	39.1856	55.1828	60.9398	58.9225	0.000122924	0.590106	up	K14674|0.0e+00|bna:106377451|K14674 TAG lipase / steryl ester hydrolase / phospholipase A2 / LPA acyltransferase [EC:3.1.1.3 3.1.1.13 3.1.1.4 2.3.1.51] | (RefSeq) triacylglycerol lipase SDP1-like	Steroid biosynthesis (ko00100);; Glycerolipid metabolism (ko00561);; Glycerophospholipid metabolism (ko00564);; Ether lipid metabolism (ko00565);; Arachidonic acid metabolism (ko00590);; Linoleic acid metabolism (ko00591);; alpha-Linolenic acid metabolism (ko00592)
Brassica_oleracea_newGene_4152	6.00241	4.9577	14.6597	2.64501	6.64158	1.68107	0.0258799	-1.17756	down	--	--
gene_Bol016819	4.93495	6.2821	3.59619	11.0936	7.67898	5.89844	0.0362625	0.824238	up	K07904|2.7e-115|bna:106433281|K07904 Ras-related protein Rab-11A | (RefSeq) ras-related protein RABA2d isoform X1	Endocytosis (ko04144)
gene_Bol032007	17.7806	17.2995	22.1649	11.2901	14.5955	7.94331	0.0132177	-0.676769	down	K02964|3.0e-81|bna:106361945|K02964 small subunit ribosomal protein S18e | (RefSeq) 40S ribosomal protein S18-like	Ribosome (ko03010)
Brassica_oleracea_newGene_11794	2.73864	1.89599	1.1453	2.24695	5.06595	3.32001	0.0314765	0.985958	up	K14288|3.5e-47|oeu:111405033|K14288 exportin-T | (RefSeq) exportin-T-like	RNA transport (ko03013)
gene_Bol004694	0.91656	0.840399	0.450984	2.09828	1.03379	2.23994	0.0130067	1.39947	up	K14489|6.9e-246|bna:106411156|K14489 arabidopsis histidine kinase 2/3/4 (cytokinin receptor) [EC:2.7.13.3] | (RefSeq) histidine kinase 4-like isoform X2	Plant hormone signal transduction (ko04075)
Brassica_oleracea_newGene_7776	7.11058	5.5832	3.12085	7.87697	7.68867	10.196	0.0238453	0.811952	up	K13460|4.2e-183|ath:AT1G12220|K13460 disease resistance protein RPS5 | (RefSeq) RPS5; Disease resistance protein (CC-NBS-LRR class) family	Plant-pathogen interaction (ko04626)
gene_Bol007588	2.4719	1.84739	3.75665	1.67902	0.879069	1.1656	0.017001	-0.9868	down	K01408|0.0e+00|bna:106410876|K01408 insulysin [EC:3.4.24.56] | (RefSeq) insulin-degrading enzyme-like 2	--
gene_Bol005064	3670.48	3408.38	2403.06	5222.19	3845.89	5417.42	0.0089262	0.728276	up	--	--
gene_Bol019265	36.4365	21.7752	34.8605	14.3139	22.6848	17.3113	0.0104654	-0.68258	down	K12670|2.2e-241|bna:106357660|K12670 oligosaccharyltransferase complex subunit beta | (RefSeq) dolichyl-diphosphooligosaccharide--protein glycosyltransferase 48 kDa subunit	N-Glycan biosynthesis (ko00510);; Various types of N-glycan biosynthesis (ko00513);; Protein processing in endoplasmic reticulum (ko04141)
gene_Bol039398	96.0105	89.5924	49.3979	86.1052	146.216	110.544	0.0447712	0.627725	up	K01757|1.1e-181|brp:103852877|K01757 strictosidine synthase [EC:4.3.3.2] | (RefSeq) protein STRICTOSIDINE SYNTHASE-LIKE 12 isoform X1	Indole alkaloid biosynthesis (ko00901)
gene_Bol043455	15.5253	15.4632	22.9107	8.29899	4.43512	8.22917	0.001646	-1.22989	down	K15382|1.8e-93|bna:106372317|K15382 solute carrier family 50 (sugar transporter) | (RefSeq) bidirectional sugar transporter SWEET15	--
gene_Bol044848	17.4218	13.7825	7.06253	18.482	31.359	26.4915	0.00329531	1.08489	up	K13424|6.1e-17|lja:Lj0g3v0288169.1|K13424 WRKY transcription factor 33 | (RefSeq) Lj0g3v0288169.1; -	MAPK signaling pathway - plant (ko04016);; Plant-pathogen interaction (ko04626)
gene_Bol020355	128.003	118.309	97.1837	152.463	151.605	183.766	0.0057186	0.617144	up	K13424|2.2e-250|bna:106410925|K13424 WRKY transcription factor 33 | (RefSeq) probable WRKY transcription factor 33	MAPK signaling pathway - plant (ko04016);; Plant-pathogen interaction (ko04626)
gene_Bol032705	10.7414	8.78955	11.8928	5.17522	7.63934	5.53814	0.00578829	-0.684182	down	K09422|7.2e-175|boe:106331423|K09422 transcription factor MYB, plant | (RefSeq) transcription factor MYB44-like	--
gene_Bol025943	4.7657	2.68827	2.08933	7.07391	9.454	5.5148	0.0147212	1.28821	up	--	--
Brassica_oleracea_newGene_11788	2.44359	2.82829	3.84714	1.41355	0.896646	1.73446	0.0130758	-1.03516	down	--	--
gene_Bol012404	1.82177	1.44419	1.43876	5.22241	2.94654	2.98698	0.0113866	1.3363	up	--	--
gene_Bol021608	38.0531	34.5738	40.5785	21.5657	21.4668	24.483	0.00162829	-0.635335	down	K01069|4.0e-142|boe:106337361|K01069 hydroxyacylglutathione hydrolase [EC:3.1.2.6] | (RefSeq) hydroxyacylglutathione hydrolase 1, mitochondrial-like	Pyruvate metabolism (ko00620)
Brassica_oleracea_newGene_5748	0.335662	0.952678	0.451966	1.4018	2.21698	0.692603	0.0318343	1.29242	up	K03137|5.0e-06|mesc:110609553|K03137 transcription initiation factor TFIIE subunit beta | (RefSeq) general transcription factor IIE subunit 2-like	Basal transcription factors (ko03022)
gene_Bol004915	56.3756	64.6685	67.0204	40.2752	15.3001	38.9405	0.0344831	-0.852331	down	--	--
gene_Bol018632	152.206	124.087	124.585	75.7265	82.9555	73.4572	8.77e-06	-0.689726	down	K14411|2.6e-214|bna:106410704|K14411 RNA-binding protein Musashi | (RefSeq) RNA-binding protein Musashi homolog 2	mRNA surveillance pathway (ko03015)
gene_Bol030440	28.7219	28.5673	46.0427	18.1877	11.3381	23.2751	0.0341734	-0.828324	down	K02899|6.1e-85|boe:106320560|K02899 large subunit ribosomal protein L27 | (RefSeq) 50S ribosomal protein L27-like	Ribosome (ko03010)
gene_Bol035476	7.44579	6.73364	5.19516	8.50664	13.9868	8.15039	0.0233865	0.735287	up	K07766|5.7e-100|bna:106401237|K07766 diphosphoinositol-polyphosphate diphosphatase [EC:3.6.1.52] | (RefSeq) nudix hydrolase 16, mitochondrial isoform X1	--
Brassica_oleracea_newGene_11686	5.6089	9.32506	4.83709	22.2762	20.6365	22.6249	4.38e-08	1.82384	up	--	--
gene_Bol016145	9.40945	8.5936	9.92877	4.25337	7.73971	2.76727	0.0221033	-0.858455	down	K14573|5.5e-21|cvr:CHLNCDRAFT_134820|K14573 nucleolar protein 4 | (RefSeq) hypothetical protein	Ribosome biogenesis in eukaryotes (ko03008)
Brassica_oleracea_newGene_7340	0.330483	1.24623	0.226721	0.150252	7.14749	3.15777	0.00374245	2.73148	up	--	--
gene_Bol022455	6.72294	7.18868	11.6126	3.39877	5.60668	1.10888	0.010809	-1.28713	down	K03093|6.0e-267|boe:106301681|K03093 RNA polymerase sigma factor | (RefSeq) RNA polymerase sigma factor sigE, chloroplastic/mitochondrial	--
gene_Bol031964	76.2092	81.0306	63.3399	140.74	77.003	142.042	0.0101906	0.833306	up	K13412|2.1e-256|bna:106411739|K13412 calcium-dependent protein kinase [EC:2.7.11.1] | (RefSeq) calcium-dependent protein kinase 11	Plant-pathogen interaction (ko04626)
gene_Bol011466	99.6967	94.018	118.045	168.928	108.487	190.637	0.0157802	0.717039	up	K08237|4.8e-274|brp:103836868|K08237 hydroquinone glucosyltransferase [EC:2.4.1.218] | (RefSeq) UDP-glycosyltransferase 72B1	--
gene_Bol043851	1.89457	0.73816	0.949758	3.19534	1.29456	3.90407	0.0395465	1.37477	up	K07198|1.9e-119|boe:106318835|K07198 5'-AMP-activated protein kinase, catalytic alpha subunit [EC:2.7.11.11] | (RefSeq) CBL-interacting serine/threonine-protein kinase 2-like	--
gene_Bol044642	2.63348	4.12493	3.36676	2.03797	1.36555	1.83642	0.0224486	-0.834811	down	K23558|0.0e+00|bna:106400657|K23558 plant 3beta-hydroxysteroid-4alpha-carboxylate 3-dehydrogenase [EC:1.1.1.418] | (RefSeq) 3beta-hydroxysteroid-dehydrogenase/decarboxylase isoform X1	Steroid biosynthesis (ko00100)
gene_Bol037964	11.4874	23.478	57.6454	8.52768	6.88134	8.29731	0.000383572	-1.84414	down	K11838|1.8e-16|sbi:8071953|K11838 ubiquitin carboxyl-terminal hydrolase 7 [EC:3.4.19.12] | (RefSeq) ubiquitin carboxyl-terminal hydrolase 12	--
gene_Bol016237	10.2664	15.2692	13.7441	33.2372	18.2463	31.447	0.00100871	1.19995	up	--	--
gene_Bol018672	39.9968	47.6054	52.4078	19.5959	27.8892	30.9739	0.00435428	-0.72794	down	K09755|1.2e-302|bna:111207882|K09755 ferulate-5-hydroxylase [EC:1.14.-.-] | (RefSeq) cytochrome P450 84A1-like	Phenylpropanoid biosynthesis (ko00940)
gene_Bol043557	4.17533	4.1437	7.165	2.32318	0.956616	3.08992	0.0299881	-1.12343	down	K18789|2.2e-73|psom:113275449|K18789 xylogalacturonan beta-1,3-xylosyltransferase [EC:2.4.2.41] | (RefSeq) probable glycosyltransferase At5g20260	--
gene_Bol014628	98.1645	68.2904	55.3962	162.897	94.3135	140.45	0.0034048	0.963474	up	K01180|9.5e-54|cmax:111487562|K01180 endo-1,3(4)-beta-glucanase [EC:3.2.1.6] | (RefSeq) uncharacterized protein LOC111487562	--
gene_Bol031256	18.272	23.0546	32.3317	38.4962	37.5325	39.1035	0.0044075	0.751448	up	K04382|2.2e-187|bna:106346526|K04382 serine/threonine-protein phosphatase 2A catalytic subunit [EC:3.1.3.16] | (RefSeq) serine/threonine-protein phosphatase PP2A-2 catalytic subunit-like	mRNA surveillance pathway (ko03015);; Autophagy - other (ko04136)
gene_Bol030994	5.7774	4.46799	3.37277	6.62888	12.1209	8.52591	0.000527778	1.08518	up	K00924|4.0e-238|lang:109349427|K00924 kinase [EC:2.7.1.-] | (RefSeq) CDPK-related protein kinase-like	--
gene_Bol010303	18.1282	23.1099	22.5735	23.2289	33.8777	32.3572	0.0156386	0.584984	up	--	--
gene_Bol033810	3.91182	2.7009	6.98424	1.82297	2.80135	2.04334	0.0221449	-0.930094	down	--	--
gene_Bol034268	5.81208	8.1671	14.5345	6.76834	3.28294	3.65981	0.0354623	-0.940187	down	K00928|2.7e-305|bna:106431327|K00928 aspartate kinase [EC:2.7.2.4] | (RefSeq) aspartokinase 2, chloroplastic-like	Glycine, serine and threonine metabolism (ko00260);; Monobactam biosynthesis (ko00261);; Cysteine and methionine metabolism (ko00270);; Lysine biosynthesis (ko00300);; 2-Oxocarboxylic acid metabolism (ko01210);; Biosynthesis of amino acids (ko01230)
gene_Bol035471	7.59732	8.10035	10.6596	5.46506	1.86305	3.37652	0.00622829	-1.16798	down	K18059|0.0e+00|bna:106397620|K18059 sulfate transporter 4 | (RefSeq) probable sulfate transporter 4.2	--
gene_Bol026623	8.70289	9.94085	6.8269	10.2927	15.7402	19.6435	0.00392828	0.951272	up	K01904|0.0e+00|bna:106389369|K01904 4-coumarate--CoA ligase [EC:6.2.1.12] | (RefSeq) 4-coumarate--CoA ligase 4-like	Ubiquinone and other terpenoid-quinone biosynthesis (ko00130);; Phenylpropanoid biosynthesis (ko00940)
gene_Bol016071	6.22397	6.51135	1.56922	10.7838	8.00184	10.2975	0.0286999	1.12692	up	K08900|1.1e-15|cit:102628180|K08900 mitochondrial chaperone BCS1 | (RefSeq) AAA-ATPase At3g50940-like	--
gene_Bol035145	319.788	158.49	143.235	284.156	1083.82	398.667	0.00106491	1.55358	up	K10691|2.2e-40|ats:109762802|K10691 E3 ubiquitin-protein ligase UBR4 [EC:2.3.2.27] | (RefSeq) LOC109762802; auxin transport protein BIG	--
gene_Bol035552	2.46319	3.10648	3.15156	0	0.38308	0.160238	2.66e-05	-3.74607	down	K02914|4.4e-77|bna:106389161|K02914 large subunit ribosomal protein L34 | (RefSeq) uncharacterized protein BNAC03G38190D	Ribosome (ko03010)
gene_Bol010071	20.2724	21.3153	15.1895	29.3961	19.1471	31.2127	0.0498003	0.612265	up	K09523|1.2e-251|boe:106313194|K09523 DnaJ homolog subfamily C member 3 | (RefSeq) dnaJ protein P58IPK homolog	Protein processing in endoplasmic reticulum (ko04141)
gene_Bol030748	1.75102	2.31315	3.48289	0.561375	1.41248	0.720879	0.00417183	-1.40471	down	K08238|1.7e-273|boe:106294275|K08238 xyloglucan 6-xylosyltransferase [EC:2.4.2.39] | (RefSeq) putative glycosyltransferase 5	--
gene_Bol025875	116.557	163.931	140.927	97.9067	79.4702	82.5457	0.00812223	-0.593932	down	K03231|1.8e-254|bna:106346370|K03231 elongation factor 1-alpha | (RefSeq) elongation factor 1-alpha 1	RNA transport (ko03013)
gene_Bol006976	2.30425	2.84855	2.77462	0.85039	1.65635	1.28343	0.0150378	-0.972988	down	--	--
gene_Bol042431	114.497	170.755	114.879	259.223	119.15	238.795	0.043625	0.752157	up	K01177|0.0e+00|bna:106411687|K01177 beta-amylase [EC:3.2.1.2] | (RefSeq) beta-amylase 1, chloroplastic	Starch and sucrose metabolism (ko00500)
gene_Bol027966	8.34027	8.19475	7.05662	13.9894	10.8028	11.1667	0.000956432	0.71234	up	K20241|0.0e+00|bna:106437539|K20241 WD repeat-containing protein 44 | (RefSeq) WD repeat-containing protein 44-like	--
gene_Bol022372	11.2188	9.79938	7.9815	15.397	12.2944	13.6232	0.0259997	0.615057	up	K22763|7.1e-124|boe:106303770|K22763 deubiquitinase DESI2 [EC:3.4.19.12] | (RefSeq) deSI-like protein At4g17486	--
gene_Bol008006	16.7737	17.6898	23.0928	12.4496	13.0061	9.82077	0.0124244	-0.608805	down	--	--
gene_Bol006102	11.8852	15.9668	22.4551	9.3286	8.05956	11.6544	0.0459031	-0.668748	down	K13466|9.9e-07|cqi:110718129|K13466 EIX receptor 1/2 | (RefSeq) LRR receptor-like serine/threonine-protein kinase GSO1	Plant-pathogen interaction (ko04626)
gene_Bol043351	3.24834	4.19806	4.79707	0	0	0	3.46e-14	-9.49883	down	K14689|7.8e-169|boe:106313323|K14689 solute carrier family 30 (zinc transporter), member 2 | (RefSeq) metal tolerance protein A2-like isoform X1	--
gene_Bol042568	9.106	11.5327	17.6338	6.40144	8.20457	5.27612	0.00489509	-0.856972	down	--	--
gene_Bol025529	12.4565	13.3183	36.7921	6.45628	5.75302	4.35359	7.27e-05	-1.80895	down	K09872|1.5e-161|bna:106396224|K09872 aquaporin PIP | (RefSeq) aquaporin PIP2-2	--
gene_Bol032265	3.17507	1.11476	1.7786	10.6642	2.3817	5.42735	0.0205281	1.73982	up	K15777|1.6e-14|mesc:110630336|K15777 4,5-DOPA dioxygenase extradiol [EC:1.13.11.-] | (RefSeq) uncharacterized protein LOC110630336	Betalain biosynthesis (ko00965)
gene_Bol013312	4.19294	2.95605	5.08209	2.61806	2.91774	1.74553	0.0499213	-0.655904	down	K19788|3.8e-228|boe:106296437|K19788 obg-like ATPase 1 | (RefSeq) ribosome-binding ATPase YchF	--
gene_Bol043854	17.9737	19.025	11.9165	18.7961	36.6379	35.1735	0.00452775	0.983361	up	K20240|8.4e-131|bna:106446096|K20240 spermidine dicoumaroyl transferase [EC:2.3.1.249] | (RefSeq) spermidine coumaroyl-CoA acyltransferase	--
gene_Bol029048	284.207	282.848	243.522	144.81	166.734	118.888	1.2e-07	-0.826543	down	K01681|0.0e+00|bna:106351933|K01681 aconitate hydratase [EC:4.2.1.3] | (RefSeq) aconitate hydratase 1-like	Citrate cycle (TCA cycle) (ko00020);; Glyoxylate and dicarboxylate metabolism (ko00630);; Carbon metabolism (ko01200);; 2-Oxocarboxylic acid metabolism (ko01210);; Biosynthesis of amino acids (ko01230)
gene_Bol045581	23.6258	14.6648	13.1491	34.4399	18.8208	27.1715	0.0472209	0.76494	up	--	--
gene_Bol027498	40.1723	40.1809	33.6398	62.5433	45.4996	73.1081	0.0053116	0.791861	up	--	--
Brassica_oleracea_newGene_690	1.10663	0.015702	0	11.4819	44.0741	7.00381	0.00543423	5.76972	up	--	--
Brassica_oleracea_newGene_776	1580.3	1712.27	1388.62	1846.82	3157.95	2771.08	0.000561237	0.824245	up	K02950|1.2e-07|cam:105853049|K02950 small subunit ribosomal protein S12 | (RefSeq) 30S ribosomal protein S12, chloroplastic-like	Ribosome (ko03010)
gene_Bol016879	10.1486	12.2143	16.5963	5.70095	11.2211	7.18409	0.0447088	-0.612863	down	K23047|2.6e-48|zju:107406037|K23047 E3 ubiquitin-protein ligase UNKL [EC:2.3.2.27] | (RefSeq) zinc finger CCCH domain-containing protein 2-like isoform X2	--
gene_Bol045859	49.5942	57.9212	51.65	14.4168	52.9629	12.1762	0.0451843	-0.973161	down	K13195|3.4e-38|mtr:MTR_4g070190|K13195 cold-inducible RNA-binding protein | (RefSeq) RNA-binding (RRM/RBD/RNP motif) family protein	--
gene_Bol025178	0.825143	0.267939	0.184603	1.55779	0.67362	1.28764	0.0351607	1.58161	up	K14638|4.2e-240|boe:106310601|K14638 solute carrier family 15 (peptide/histidine transporter), member 3/4 | (RefSeq) LOW QUALITY PROTEIN: protein NRT1/ PTR FAMILY 8.1	--
gene_Bol017058	3.58097	3.61853	3.43927	2.12215	1.9386	2.13473	0.0178212	-0.670788	down	--	--
gene_Bol008421	122.351	127.165	94.8481	180.046	133.618	181.469	0.0135469	0.638934	up	K22804|1.0e-62|bna:106442438|K22804 structural maintenance of chromosomes protein 6 | (RefSeq) structural maintenance of chromosomes protein 6B-like	--
Brassica_oleracea_newGene_4591	1.48811	0.723322	0.682082	0.909445	2.63707	2.21939	0.0213582	1.19722	up	K22804|7.4e-72|bna:106442438|K22804 structural maintenance of chromosomes protein 6 | (RefSeq) structural maintenance of chromosomes protein 6B-like	--
gene_Bol035220	6.90901	4.68518	0.941683	12.5501	13.0361	6.29455	0.032576	1.40762	up	K18835|2.3e-38|eus:EUTSA_v10012199mg|K18835 WRKY transcription factor 2 | (RefSeq) hypothetical protein	Plant-pathogen interaction (ko04626)
gene_Bol039706	116.837	116.669	133.771	72.3161	85.4319	48.4862	0.000325419	-0.751391	down	K02875|1.6e-65|bna:106407324|K02875 large subunit ribosomal protein L14e | (RefSeq) 60S ribosomal protein L14-2	Ribosome (ko03010)
gene_Bol042374	21.0687	23.4339	14.3887	23.6009	40.1006	34.2442	0.014455	0.818838	up	--	--
Brassica_oleracea_newGene_11862	1.60895	1.10391	0.669011	1.62831	2.25023	3.68629	0.0162105	1.35554	up	K24104|1.1e-39|thj:104799061|K24104 GPN-loop GTPase | (RefSeq) LOW QUALITY PROTEIN: uncharacterized protein LOC104799061	--
gene_Bol006248	10.249	4.20711	11.3316	3.66546	5.14401	2.37591	0.0217787	-1.11271	down	--	--
gene_Bol005557	107.516	87.5085	60.9932	168.925	95.6982	197.606	0.00766883	0.985522	up	K09490|0.0e+00|boe:106332627|K09490 endoplasmic reticulum chaperone BiP [EC:3.6.4.10] | (RefSeq) mediator of RNA polymerase II transcription subunit 37f-like	Protein export (ko03060);; Protein processing in endoplasmic reticulum (ko04141)
gene_Bol039220	2.86141	3.41949	7.60357	0.765672	1.50696	0.59592	0.000350039	-2.17146	down	K22736|1.9e-96|bna:106376730|K22736 vacuolar iron transporter family protein | (RefSeq) vacuolar iron transporter homolog 2	--
gene_Bol012568	6.58384	11.9927	9.35236	2.11172	7.54418	2.25111	0.0173006	-1.19252	down	K12373|9.8e-255|bna:111197814|K12373 hexosaminidase [EC:3.2.1.52] | (RefSeq) beta-hexosaminidase 3	Other glycan degradation (ko00511);; Various types of N-glycan biosynthesis (ko00513);; Amino sugar and nucleotide sugar metabolism (ko00520);; Glycosaminoglycan degradation (ko00531);; Glycosphingolipid biosynthesis - globo and isoglobo series (ko00603);; Glycosphingolipid biosynthesis - ganglio series (ko00604)
gene_Bol042898	12.9471	14.9481	10.3292	33.9041	14.005	22.5704	0.00891666	1.00149	up	K20660|1.1e-160|bna:111207878|K20660 cytochrome P450 family 709 | (RefSeq) cytochrome P450 709B3-like	--
gene_Bol027123	34.7685	34.5862	51.418	19.4338	16.9973	18.0481	1.91e-05	-1.03685	down	K06269|1.5e-197|boe:106301972|K06269 serine/threonine-protein phosphatase PP1 catalytic subunit [EC:3.1.3.16] | (RefSeq) serine/threonine-protein phosphatase PP1 isozyme 7 isoform X1	mRNA surveillance pathway (ko03015)
gene_Bol017767	43.8607	38.4563	13.5197	27.8271	157.605	40.0586	0.0388153	1.25097	up	K07300|3.1e-254|bna:106429353|K07300 Ca2+:H+ antiporter | (RefSeq) vacuolar cation/proton exchanger 1	--
gene_Bol040805	26.1264	29.0455	42.7084	15.6592	17.1282	15.7454	0.000234674	-0.909308	down	--	--
gene_Bol038582	5.84996	6.94691	9.51503	2.85692	5.01944	3.99467	0.0230957	-0.81162	down	--	--
gene_Bol033769	5.60814	5.27467	7.01361	2.22577	3.81287	2.82254	0.00325421	-0.923284	down	--	--
gene_Bol035550	3.63319	3.42813	3.34934	2.40789	2.36338	1.18994	0.0203796	-0.724312	down	K04077|3.3e-299|bna:106389157|K04077 chaperonin GroEL | (RefSeq) chaperonin CPN60-like 2, mitochondrial	RNA degradation (ko03018)
gene_Bol036284	7.12717	7.11783	7.48567	12.2245	16.945	15.613	2.59e-07	1.13789	up	--	--
gene_Bol017412	37.2847	42.4013	46.3211	27.6908	34.5701	16.841	0.0258373	-0.598421	down	K02900|4.8e-68|bna:106353796|K02900 large subunit ribosomal protein L27Ae | (RefSeq) 60S ribosomal protein L27a-3-like	Ribosome (ko03010)
gene_Bol036190	0.339922	0.492082	0.911305	0.1822	0.238533	0.189513	0.0102408	-1.40433	down	--	--
gene_Bol039170	12.4317	12.2754	19.7557	6.97836	11.0272	5.8147	0.00396111	-0.823383	down	K10581|1.4e-44|egu:105047412|K10581 ubiquitin-conjugating enzyme E2 O [EC:2.3.2.24] | (RefSeq) uncharacterized protein LOC105047412	Ubiquitin mediated proteolysis (ko04120)
gene_Bol033147	8.4674	10.2602	4.32245	17.8195	9.63476	13.924	0.021866	0.955374	up	--	--
gene_Bol025905	22.4001	20.6338	20.0427	40.8103	37.1527	42.1828	4.8e-05	1.03828	up	K11252|5.8e-29|ath:AT5G22880|K11252 histone H2B | (RefSeq) HTB2; histone B2	--
gene_Bol034926	4.01527	3.50163	4.49763	1.35882	1.93663	1.52293	5.05e-05	-1.21744	down	K00817|4.4e-228|bna:106395488|K00817 histidinol-phosphate aminotransferase [EC:2.6.1.9] | (RefSeq) histidinol-phosphate aminotransferase 1, chloroplastic-like	Histidine metabolism (ko00340);; Tyrosine metabolism (ko00350);; Phenylalanine metabolism (ko00360);; Phenylalanine, tyrosine and tryptophan biosynthesis (ko00400);; Tropane, piperidine and pyridine alkaloid biosynthesis (ko00960);; Biosynthesis of amino acids (ko01230)
gene_Bol005879	47.1365	63.4514	41.7019	49.1866	96.5285	78.4859	0.0367164	0.64186	up	--	--
gene_Bol024006	32.0907	24.1884	12.9006	46.0586	30.3797	39.1345	0.0266092	0.852036	up	--	--
gene_Bol024864	683.873	776.175	559.36	1182.17	830.382	1335.98	0.00330421	0.851268	up	K01953|0.0e+00|bna:106352721|K01953 asparagine synthase (glutamine-hydrolysing) [EC:6.3.5.4] | (RefSeq) asparagine synthetase [glutamine-hydrolyzing]	Alanine, aspartate and glutamate metabolism (ko00250);; Biosynthesis of amino acids (ko01230)
gene_Bol016748	3.05513	2.81464	0.617989	4.17454	5.65791	10.0488	0.00763472	1.73446	up	K10767|1.2e-163|boe:106299410|K10767 mRNA N6-methyladenine demethylase [EC:1.14.11.53] | (RefSeq) uncharacterized protein LOC106299410 isoform X1	--
gene_Bol018630	7.86428	10.97	7.18138	9.40418	15.8084	12.3651	0.0360918	0.614519	up	--	--
gene_Bol029248	1.73635	0.718347	0.821252	8.70286	3.2179	3.81725	0.000223838	2.37699	up	--	--
gene_Bol016439	6.87516	5.35493	7.78768	1.28212	1.9466	3.15154	0.00678392	-1.48735	down	--	--
gene_Bol024612	0.903716	2.19725	2.94649	0	0	0	2.34e-10	-8.70202	down	--	--
gene_Bol023582	61.484	69.4227	46.7765	76.0272	70.2229	106.449	0.0324046	0.626905	up	--	--
Brassica_oleracea_newGene_8822	31.7348	20.3029	11.6157	56.2549	20.4536	65.2495	0.010934	1.30351	up	--	--
gene_Bol007182	5.88751	6.83221	4.53457	7.8341	14.196	11.5199	0.00137145	1.03973	up	K03188|3.6e-43|dcr:108224146|K03188 urease accessory protein | (RefSeq) uncharacterized protein LOC108224146 isoform X1	--
gene_Bol012782	31.5023	27.8315	28.4984	37.5145	40.8925	50.8372	0.00541789	0.671012	up	K12948|7.6e-94|boe:106324948|K12948 signal peptidase complex subunit 3 [EC:3.4.-.-] | (RefSeq) signal peptidase complex subunit 3B	Protein export (ko03060)
gene_Bol017081	5.01505	6.57501	3.4719	7.72236	7.03396	9.92896	0.0235959	0.822758	up	--	--
gene_Bol044226	7.35204	9.21097	2.13608	15.8676	16.707	14.6675	0.00397838	1.42036	up	--	--
Brassica_oleracea_newGene_11455	1.9052	1.46308	0.783444	1.72851	3.40538	4.17453	0.0108731	1.2678	up	--	--
gene_Bol014087	24.5527	40.0107	15.7387	67.2919	87.8799	54.88	0.000156716	1.45522	up	--	--
gene_Bol038487	167.671	212.752	97.9705	94.0287	26.0582	81.7886	0.0273745	-1.10743	down	--	--
gene_Bol030925	50.371	55.2677	47.1447	65.5998	104.305	61.0735	0.00519866	0.670897	up	--	--
gene_Bol007932	3.88994	3.32049	4.46996	2.60202	2.41025	1.65155	0.0116639	-0.713075	down	--	--
gene_Bol042845	25.4001	22.646	14.2861	35.3392	24.5559	32.8929	0.0275833	0.688063	up	--	--
gene_Bol019621	220.802	199.749	84.6677	377.895	354.595	482.558	0.000304721	1.37827	up	K07870|5.4e-17|pxb:103958384|K07870 mitochondrial Rho GTPase 1 [EC:3.6.5.-] | (RefSeq) uncharacterized protein LOC103958384	--
gene_Bol018247	5.59528	4.85903	2.15471	19.2173	7.47233	10.8845	0.000407257	1.68847	up	--	--
gene_Bol020958	62.7518	59.256	53.3139	96.7568	67.4771	86.8256	0.00760822	0.632763	up	K18469|0.0e+00|boe:106307633|K18469 TBC1 domain family member 5 | (RefSeq) TBC1 domain family member 5 homolog A	--
gene_Bol034305	11.5751	10.6941	17.297	6.12896	10.0533	4.64572	0.0117165	-0.849224	down	K00286|4.9e-146|bna:106417090|K00286 pyrroline-5-carboxylate reductase [EC:1.5.1.2] | (RefSeq) pyrroline-5-carboxylate reductase-like	Arginine and proline metabolism (ko00330);; Biosynthesis of amino acids (ko01230)
gene_Bol024510	107.544	129.202	78.1962	26.0679	30.4392	54.0899	0.000192658	-1.38376	down	K05681|1.4e-163|nau:109228191|K05681 ATP-binding cassette, subfamily G (WHITE), member 2 | (RefSeq) ABC transporter G family member 9-like	ABC transporters (ko02010)
gene_Bol041842	3.00977	2.84924	2.53333	3.80667	6.24159	5.00448	0.0144761	0.91636	up	K23166|3.1e-85|bna:106394784|K23166 optic atrophy 3 protein | (RefSeq) OPA3-like protein	--
gene_Bol025523	5.0105	4.9216	4.72331	2.52012	3.70299	2.17637	0.00158253	-0.721738	down	K16224|1.5e-101|eus:EUTSA_v10023115mg|K16224 senescence-induced receptor-like serine/threonine-protein kinase | (RefSeq) hypothetical protein	MAPK signaling pathway - plant (ko04016);; Plant-pathogen interaction (ko04626)
gene_Bol018258	1.20025	2.45896	1.83465	7.90334	1.29161	4.55463	0.0219268	1.45596	up	K14487|0.0e+00|boe:106322780|K14487 auxin responsive GH3 gene family | (RefSeq) indole-3-acetic acid-amido synthetase GH3.6	Plant hormone signal transduction (ko04075)
gene_Bol041229	25.5541	22.5157	24.6255	46.6237	31.6472	43.7209	0.000777646	0.866448	up	--	--
Brassica_oleracea_newGene_9177	1.12294	1.89818	1.57053	3.00719	4.37637	1.83365	0.0274048	0.982471	up	--	--
gene_Bol006068	1707.5	1306.35	1266.66	548.514	923.046	857.486	0.00212417	-0.779746	down	K00799|3.3e-118|bna:106439328|K00799 glutathione S-transferase [EC:2.5.1.18] | (RefSeq) glutathione S-transferase F3	Glutathione metabolism (ko00480)
Brassica_oleracea_newGene_5628	4.06913	4.41177	6.34336	7.8815	26.6638	6.58393	0.0067504	1.50089	up	--	--
gene_Bol035149	24.3661	26.7523	47.3634	12.3876	20.9621	12.5677	0.00157639	-1.01789	down	K00679|4.0e-24|cic:CICLE_v10027727mg|K00679 phospholipid:diacylglycerol acyltransferase [EC:2.3.1.158] | (RefSeq) hypothetical protein	Glycerolipid metabolism (ko00561)
Brassica_oleracea_newGene_9020	1.01505	1.29455	1.19242	2.08783	5.35407	1.78682	0.00126669	1.55203	up	--	--
gene_Bol024913	16.824	13.4512	12.6261	17.59	45.5548	22.1421	0.0014544	1.0533	up	K05643|3.2e-64|hbr:110642388|K05643 ATP-binding cassette, subfamily A (ABC1), member 3 | (RefSeq) ABC transporter A family member 1	ABC transporters (ko02010)
gene_Bol007321	4.09925	3.89729	7.60326	2.55176	3.66596	2.13084	0.0292513	-0.814676	down	K20547|8.3e-196|bna:111212056|K20547 basic endochitinase B [EC:3.2.1.14] | (RefSeq) endochitinase CH25-like	Amino sugar and nucleotide sugar metabolism (ko00520);; MAPK signaling pathway - plant (ko04016)
gene_Bol023899	79.8175	82.8139	115.076	53.8225	45.835	67.9051	0.0295294	-0.604214	down	K01698|7.6e-239|bna:106406308|K01698 porphobilinogen synthase [EC:4.2.1.24] | (RefSeq) delta-aminolevulinic acid dehydratase 1, chloroplastic	Porphyrin and chlorophyll metabolism (ko00860)
gene_Bol026391	3.37116	3.90184	3.29518	0.829446	2.04573	0.797777	0.00174093	-1.45094	down	--	--
gene_Bol021503	12.3912	11.3848	16.9781	7.17451	10.066	7.76063	0.0124683	-0.610562	down	K00927|2.2e-205|brp:103853201|K00927 phosphoglycerate kinase [EC:2.7.2.3] | (RefSeq) phosphoglycerate kinase 3, cytosolic	Glycolysis / Gluconeogenesis (ko00010);; Carbon fixation in photosynthetic organisms (ko00710);; Carbon metabolism (ko01200);; Biosynthesis of amino acids (ko01230)
gene_Bol013144	13.5314	11.1166	7.82783	18.289	13.5608	17.3262	0.0307862	0.708741	up	K08235|1.6e-109|boe:106295406|K08235 xyloglucan:xyloglucosyl transferase [EC:2.4.1.207] | (RefSeq) probable xyloglucan endotransglucosylase/hydrolase protein 11	--
gene_Bol031109	9.68079	4.27918	5.35981	28.3977	7.7415	22.4109	0.00414825	1.72844	up	--	--
gene_Bol018986	15.3018	9.91108	11.8608	4.08765	4.63251	3.00792	2.71e-10	-1.5698	down	K17470|0.0e+00|brp:103853103|K17470 sulfate transporter 1, high-affinity | (RefSeq) sulfate transporter 1.2	--
gene_Bol010957	6.02168	6.08592	9.41591	3.62052	6.33707	2.81811	0.0363816	-0.683213	down	K02469|0.0e+00|bna:106353026|K02469 DNA gyrase subunit A [EC:5.6.2.2] | (RefSeq) DNA gyrase subunit A, chloroplastic/mitochondrial-like isoform X2	--
gene_Bol010942	32.7978	31.2475	11.6677	49.1821	28.8386	52.903	0.0468881	0.911699	up	--	--
gene_Bol010398	75.3474	83.058	115.526	45.8519	83.5452	35.0106	0.0298814	-0.673515	down	K00134|6.5e-193|boe:106295575|K00134 glyceraldehyde 3-phosphate dehydrogenase [EC:1.2.1.12] | (RefSeq) glyceraldehyde-3-phosphate dehydrogenase, cytosolic	Glycolysis / Gluconeogenesis (ko00010);; Carbon fixation in photosynthetic organisms (ko00710);; Carbon metabolism (ko01200);; Biosynthesis of amino acids (ko01230)
gene_Bol010854	2.12788	2.51987	3.21924	0.22311	1.4815	0.839153	0.0181377	-1.51583	down	K12126|2.4e-16|pop:7486837|K12126 phytochrome-interacting factor 3 | (RefSeq) transcription factor PIF3	Plant hormone signal transduction (ko04075);; Circadian rhythm - plant (ko04712)
Brassica_oleracea_newGene_7758	2.3993	1.06989	0.335186	4.96279	9.90587	2.66092	0.00170637	2.14891	up	K12611|2.7e-49|brp:103836395|K12611 mRNA-decapping enzyme 1B [EC:3.-.-.-] | (RefSeq) mRNA-decapping enzyme-like protein isoform X2	RNA degradation (ko03018)
gene_Bol030207	1.13635	0.652418	1.64232	0	0.236642	0.094571	0.000846028	-3.1745	down	K09338|2.3e-287|bna:106392669|K09338 homeobox-leucine zipper protein | (RefSeq) homeobox-leucine zipper protein HDG1-like	--
gene_Bol017337	15.8469	14.3553	22.894	7.80155	14.1856	6.52122	0.0105276	-0.826047	down	--	--
gene_Bol036864	14.0082	11.5982	11.551	15.4441	24.3165	15.0632	0.00829737	0.64012	up	K02634|3.0e-125|bna:11542074|K02634 apocytochrome f | (RefSeq) petA, BRNAC_p034; cytochrome f	Photosynthesis (ko00195)
gene_Bol025289	58.2152	59.1734	39.6825	83.0201	70.2924	68.9926	0.0153078	0.601002	up	--	--
gene_Bol027602	7.34827	12.5966	21.0153	4.11573	6.08928	6.60823	0.0100403	-1.17301	down	K22736|1.7e-97|boe:106298833|K22736 vacuolar iron transporter family protein | (RefSeq) vacuolar iron transporter homolog 2	--
Brassica_oleracea_newGene_9886	4.54217	3.77798	2.71934	4.96826	15.3593	7.17478	0.00070901	1.38195	up	--	--
gene_Bol038196	6.76431	8.99743	12.2063	2.64803	2.04651	2.69468	6.12e-07	-1.79508	down	K23544|9.0e-112|brp:103842861|K23544 serine incorporator 1/3 | (RefSeq) serine incorporator 3	--
gene_Bol030742	16.0463	14.2696	8.67004	18.1442	20.3333	17.8296	0.0283806	0.623418	up	--	--
