# Supplementary material for: Transcriptome Analysis Reveals the Mechanism by Which Exogenous Melatonin Treatment Delays Leaf Senescence of Postharvest Chinese Kale (Brassica oleracea var. alboglabra)
Source: Int J Mol Sci. 2024 Feb 13;25(4):2250. doi: 10.3390/ijms25042250 (PMC10889248; doi:10.3390/ijms25042250)
Supplement: Supplementary file 1 [file ijms-25-02250-s001.zip › Di et al. Supplementary Table S4.xlsx]

## Sheet: Sheet 1
Supplementary Table 4 KEGG classification of DEGs in comparison pair C3 vs M3
KEGG Category	KEGG Sub-category	KEGG Pathway	Up Gene Count	Up K Number Count	Up Gene id	Up KEGG Orthology	Down Gene Count	Down K Number Count	Down Gene id	Down KEGG Orthology
Cellular Processes	Transport and catabolism	Autophagy - other	3	2	gene_Bol007057;gene_Bol031256;gene_Bol042549	K08341+K04382+K08341	1	1	gene_Bol029488	K08333
		Endocytosis	7	3	gene_Bol016819;gene_Bol018290;gene_Bol029920;gene_Bol032622;gene_Bol034394;gene_Bol035026;gene_Bol036512	K07904+K07904+K07904+K12486+K03283+K07904+K03283	3	3	gene_Bol016391;gene_Bol019716;gene_Bol024978	K12472+K12493+K19476
		Peroxisome	5	4	gene_Bol015928;gene_Bol028016;gene_Bol029614;gene_Bol030273;gene_Bol031939	K00232+K08726+K01897+K08726+K13348	9	7	gene_Bol006047;gene_Bol006999;gene_Bol009952;gene_Bol013804;gene_Bol026973;gene_Bol027306;gene_Bol037212;gene_Bol039786;gene_Bol040444	K08726+K03781+K13347+K13356+K03781+K17879+K08726+K00232+K11517
		Phagosome	5	5	Brassica_oleracea_newGene_4253;gene_Bol009394;gene_Bol030149;gene_Bol034421;gene_Bol036297	K07374+K02155+K09481+K08488+K08054	1	1	gene_Bol006551	K08057
Environmental Information Processing	Signal transduction	MAPK signaling pathway - plant	22	13	Brassica_oleracea_newGene_10185;Brassica_oleracea_newGene_329;gene_Bol011480;gene_Bol012530;gene_Bol012794;gene_Bol017985;gene_Bol020355;gene_Bol020573;gene_Bol020960;gene_Bol022878;gene_Bol025407;gene_Bol029150;gene_Bol031419;gene_Bol033310;gene_Bol033793;gene_Bol038202;gene_Bol040176;gene_Bol042105;gene_Bol043000;gene_Bol044030;gene_Bol044732;gene_Bol044848	K16224+K13449+K13425+K14509+K14497+K13425+K13424+K02183+K16224+K20725+K14496+K20559+K20559+K20716+K14497+K14497+K16224+K13426+K02183+K14496+K13422+K13424	13	11	gene_Bol006999;gene_Bol007321;gene_Bol009697;gene_Bol011094;gene_Bol013343;gene_Bol020364;gene_Bol022023;gene_Bol023805;gene_Bol025523;gene_Bol026318;gene_Bol026973;gene_Bol041249;gene_Bol043376	K03781+K20547+K14496+K13416+K13447+K20728+K16224+K13422+K16224+K14497+K03781+K20606+K13420
		Phosphatidylinositol signaling system	6	5	gene_Bol015528;gene_Bol020573;gene_Bol034314;gene_Bol043000;gene_Bol043772;gene_Bol045172	K05857+K02183+K13024+K02183+K18081+K20279	3	3	gene_Bol008838;gene_Bol009954;gene_Bol019547	K00901+K21797+K00888
		Plant hormone signal transduction	32	19	Brassica_oleracea_newGene_329;gene_Bol004694;gene_Bol004697;gene_Bol010308;gene_Bol012209;gene_Bol012530;gene_Bol012794;gene_Bol013052;gene_Bol013615;gene_Bol014220;gene_Bol014260;gene_Bol015094;gene_Bol018258;gene_Bol022049;gene_Bol024417;gene_Bol025407;gene_Bol027952;gene_Bol029321;gene_Bol029986;gene_Bol031508;gene_Bol032811;gene_Bol033793;gene_Bol036237;gene_Bol037085;gene_Bol038202;gene_Bol0…	K13449+K14489+K14489+K14431+K14504+K14509+K14497+K14487+K12126+K14504+K16189+K14488+K14487+K14492+K14502+K14496+K14487+K13464+K12126+K14491+K14492+K14497+K14493+K14500+K14497+K14484+K14504+K14484+K13464+K14496+K13422+K13464	14	11	gene_Bol004667;gene_Bol008286;gene_Bol009697;gene_Bol009821;gene_Bol010264;gene_Bol010854;gene_Bol011094;gene_Bol015120;gene_Bol020058;gene_Bol023805;gene_Bol026318;gene_Bol030655;gene_Bol039912;gene_Bol041490	K14494+K14502+K14496+K14488+K14488+K12126+K13416+K14491+K14491+K13422+K14497+K12126+K14503+K14487
	Membrane transport	ABC transporters	2	2	gene_Bol018731;gene_Bol024913	K05641+K05643	8	4	gene_Bol005583;gene_Bol007350;gene_Bol015783;gene_Bol024510;gene_Bol035509;gene_Bol035512;gene_Bol042222;gene_Bol043423	K05658+K05665+K05665+K05681+K05666+K05666+K05658+K05681
Genetic Information Processing	Folding, sorting and degradation	Proteasome	0	0	--	--	2	2	Brassica_oleracea_newGene_4050;gene_Bol005308	K03038+K03064
		Protein export	7	4	gene_Bol004630;gene_Bol005557;gene_Bol006580;gene_Bol012782;gene_Bol013948;gene_Bol015871;gene_Bol030149	K09490+K09490+K09490+K12948+K09490+K03100+K09481	1	1	gene_Bol043255	K03217
		Protein processing in endoplasmic reticulum	16	12	gene_Bol004630;gene_Bol005557;gene_Bol006580;gene_Bol009568;gene_Bol010071;gene_Bol011969;gene_Bol013948;gene_Bol014413;gene_Bol021678;gene_Bol022139;gene_Bol025012;gene_Bol030149;gene_Bol034394;gene_Bol036297;gene_Bol036512;gene_Bol037168	K09490+K09490+K09490+K09487+K09523+K13989+K09490+K09517+K10666+K07953+K09562+K09481+K03283+K08054+K03283+K09486	7	7	gene_Bol006551;gene_Bol008656;gene_Bol019265;gene_Bol027638;gene_Bol027866;gene_Bol035774;gene_Bol037005	K08057+K10575+K12670+K12666+K01228+K13993+K10088
		RNA degradation	5	4	Brassica_oleracea_newGene_7758;gene_Bol005235;gene_Bol013256;gene_Bol017630;gene_Bol043957	K12611+K08311+K04077+K13126+K04077	5	5	gene_Bol010879;gene_Bol016781;gene_Bol019733;gene_Bol035550;gene_Bol039120	K11600+K13126+K12580+K04077+K00850
		SNARE interactions in vesicular transport	5	3	gene_Bol008391;gene_Bol009129;gene_Bol034421;gene_Bol041790;gene_Bol042952	K08500+K08486+K08488+K08500+K08486	1	1	gene_Bol043600	K08515
		Sulfur relay system	0	0	--	--	1	1	gene_Bol038520	K01011
		Ubiquitin mediated proteolysis	6	3	gene_Bol005035;gene_Bol009126;gene_Bol011751;gene_Bol012481;gene_Bol015885;gene_Bol037760	K10260+K10260+K08770+K03357+K10260+K10260	3	3	gene_Bol008656;gene_Bol038478;gene_Bol039170	K10575+K03353+K10581
	Replication and repair	Base excision repair	3	3	gene_Bol005000;gene_Bol022048;gene_Bol026105	K10802+K10773+K03648	1	1	gene_Bol041196	K02324
		DNA replication	2	1	Brassica_oleracea_newGene_79;gene_Bol025722	K07466+K07466	3	2	Brassica_oleracea_newGene_5236;gene_Bol004457;gene_Bol041196	K07466+K07466+K02324
		Homologous recombination	5	3	Brassica_oleracea_newGene_79;gene_Bol018999;gene_Bol025722;gene_Bol026483;gene_Bol042154	K07466+K12173+K07466+K10728+K12173	2	1	Brassica_oleracea_newGene_5236;gene_Bol004457	K07466+K07466
		Mismatch repair	2	1	Brassica_oleracea_newGene_79;gene_Bol025722	K07466+K07466	4	3	Brassica_oleracea_newGene_5236;gene_Bol004457;gene_Bol010476;gene_Bol025622	K07466+K07466+K07456+K08734
		Nucleotide excision repair	2	1	Brassica_oleracea_newGene_79;gene_Bol025722	K07466+K07466	3	2	Brassica_oleracea_newGene_5236;gene_Bol004457;gene_Bol041196	K07466+K07466+K02324
	Transcription	Basal transcription factors	1	1	Brassica_oleracea_newGene_5748	K03137	0	0	--	--
		RNA polymerase	2	1	Brassica_oleracea_newGene_8674;gene_Bol016454	K03006+K03006	2	1	Brassica_oleracea_newGene_7144;Brassica_oleracea_newGene_8942	K03006+K03006
		Spliceosome	8	6	Brassica_oleracea_newGene_9947;gene_Bol004917;gene_Bol015899;gene_Bol034214;gene_Bol034394;gene_Bol035515;gene_Bol036512;gene_Bol043410	K12835+K12893+K12900+K12835+K03283+K12863+K03283+K12818	1	1	gene_Bol008820	K12859
	Translation	Aminoacyl-tRNA biosynthesis	1	1	Brassica_oleracea_newGene_2604	K22503	2	2	gene_Bol014874;gene_Bol018711	K02433+K01866
		RNA transport	8	8	Brassica_oleracea_newGene_11794;Brassica_oleracea_newGene_3567;gene_Bol012403;gene_Bol017630;gene_Bol022281;gene_Bol023016;gene_Bol038376;gene_Bol044956	K14288+K14297+K14318+K13126+K03260+K03239+K03238+K14295	5	4	gene_Bol008945;gene_Bol016781;gene_Bol020368;gene_Bol021467;gene_Bol025875	K03231+K13126+K03239+K14297+K03231
		Ribosome	5	5	Brassica_oleracea_newGene_776;gene_Bol030275;gene_Bol035639;gene_Bol036869;gene_Bol042497	K02950+K02939+K02992+K02886+K02932	32	27	Brassica_oleracea_newGene_2752;Brassica_oleracea_newGene_5022;gene_Bol004742;gene_Bol005752;gene_Bol006514;gene_Bol010795;gene_Bol013755;gene_Bol015380;gene_Bol016098;gene_Bol017412;gene_Bol017969;gene_Bol020423;gene_Bol021222;gene_Bol023091;gene_Bol023831;gene_Bol024206;gene_Bol025566;gene_Bol026347;gene_Bol027868;gene_Bol029020;gene_Bol030440;gene_Bol032007;gene_Bol033019;gene_Bol035552;gene_Bo…	K02893+K02923+K02881+K02961+K02957+K02942+K02925+K02962+K02929+K02900+K02991+K02918+K02997+K02973+K02921+K02940+K02920+K02998+K02880+K02938+K02899+K02964+K02900+K02914+K02925+K02865+K02877+K02875+K02998+K02894+K02991+K02921
		Ribosome biogenesis in eukaryotes	2	2	gene_Bol017906;gene_Bol021783	K03097+K14544	3	2	gene_Bol016145;gene_Bol021475;gene_Bol038575	K14573+K06943+K06943
		mRNA surveillance pathway	5	5	gene_Bol007609;gene_Bol009884;gene_Bol017630;gene_Bol031256;gene_Bol039663	K14376+K11584+K13126+K04382+K14411	5	4	gene_Bol012767;gene_Bol016781;gene_Bol018632;gene_Bol027123;gene_Bol042753	K06269+K13126+K14411+K06269+K03456
Metabolism	Amino acid metabolism	Alanine, aspartate and glutamate metabolism	7	5	gene_Bol011217;gene_Bol021292;gene_Bol024541;gene_Bol024863;gene_Bol024864;gene_Bol034760;gene_Bol042419	K13051+K01915+K00261+K01953+K01953+K13051+K00820	11	8	gene_Bol007100;gene_Bol007596;gene_Bol012554;gene_Bol015117;gene_Bol017945;gene_Bol022912;gene_Bol033016;gene_Bol033758;gene_Bol038539;gene_Bol043823;gene_Bol044448	K14454+K01939+K01580+K01580+K00811+K01915+K14272+K00811+K17761+K13051+K01939
		Arginine and proline metabolism	3	2	gene_Bol032297;gene_Bol040145;gene_Bol043875	K00318+K00318+K01426	8	7	gene_Bol007100;gene_Bol014895;gene_Bol017945;gene_Bol023768;gene_Bol030278;gene_Bol030497;gene_Bol033758;gene_Bol034305	K14454+K01426+K00811+K17839+K00797+K01611+K00811+K00286
		Arginine biosynthesis	2	2	gene_Bol021292;gene_Bol024541	K01915+K00261	7	6	gene_Bol007100;gene_Bol010462;gene_Bol017945;gene_Bol022912;gene_Bol033016;gene_Bol033758;gene_Bol039897	K14454+K01427+K00811+K01915+K14272+K00811+K00611
		Cysteine and methionine metabolism	3	3	gene_Bol018515;gene_Bol032729;gene_Bol036769	K01244+K01762+K00826	11	10	gene_Bol007100;gene_Bol011591;gene_Bol013252;gene_Bol016778;gene_Bol017945;gene_Bol030278;gene_Bol030497;gene_Bol033758;gene_Bol034268;gene_Bol038520;gene_Bol045144	K14454+K00025+K00058+K00899+K00811+K00797+K01611+K00811+K00928+K01011+K05396
		Glycine, serine and threonine metabolism	0	0	--	--	9	9	Brassica_oleracea_newGene_3720;Brassica_oleracea_newGene_8595;gene_Bol013252;gene_Bol021423;gene_Bol027824;gene_Bol033016;gene_Bol034268;gene_Bol044376;gene_Bol044942	K01696+K01620+K00058+K15919+K15893+K14272+K00928+K00108+K00276
		Histidine metabolism	0	0	--	--	2	2	gene_Bol034926;gene_Bol043141	K00817+K14152
		Lysine biosynthesis	0	0	--	--	1	1	gene_Bol034268	K00928
		Phenylalanine metabolism	4	2	gene_Bol005084;gene_Bol025102;gene_Bol037689;gene_Bol043875	K10775+K10775+K10775+K01426	6	5	gene_Bol007100;gene_Bol014895;gene_Bol017945;gene_Bol033758;gene_Bol034926;gene_Bol044942	K14454+K01426+K00811+K00811+K00817+K00276
		Phenylalanine, tyrosine and tryptophan biosynthesis	3	3	gene_Bol028822;gene_Bol032277;gene_Bol036026	K00891+K01850+K05359	5	4	Brassica_oleracea_newGene_3720;gene_Bol007100;gene_Bol017945;gene_Bol033758;gene_Bol034926	K01696+K14454+K00811+K00811+K00817
		Tryptophan metabolism	1	1	gene_Bol043875	K01426	3	2	gene_Bol006999;gene_Bol014895;gene_Bol026973	K03781+K01426+K03781
		Tyrosine metabolism	0	0	--	--	7	6	gene_Bol007100;gene_Bol017945;gene_Bol020546;gene_Bol027580;gene_Bol033758;gene_Bol034926;gene_Bol044942	K14454+K00811+K00121+K18857+K00811+K00817+K00276
		Valine, leucine and isoleucine biosynthesis	1	1	gene_Bol036769	K00826	2	2	gene_Bol021278;gene_Bol023744	K01653+K00053
		Valine, leucine and isoleucine degradation	3	2	gene_Bol025606;gene_Bol036769;gene_Bol043746	K00020+K00826+K00020	2	2	gene_Bol008791;gene_Bol025973	K00166+K01968
	Biosynthesis of other secondary metabolites	Benzoxazinoid biosynthesis	0	0	--	--	1	1	gene_Bol040883	K13229
		Betalain biosynthesis	1	1	gene_Bol032265	K15777	0	0	--	--
		Flavonoid biosynthesis	5	3	Brassica_oleracea_newGene_5136;Brassica_oleracea_newGene_5137;gene_Bol024486;gene_Bol038972;gene_Bol045823	K13065+K13065+K05278+K01859+K13065	0	0	--	--
		Glucosinolate biosynthesis	1	1	gene_Bol036769	K00826	0	0	--	--
		Indole alkaloid biosynthesis	1	1	gene_Bol039398	K01757	1	1	gene_Bol044427	K01757
		Isoflavonoid biosynthesis	5	2	gene_Bol018620;gene_Bol027250;gene_Bol028922;gene_Bol030178;gene_Bol043644	K13260+K13260+K13260+K13265+K13260	1	1	gene_Bol042981	K13260
		Isoquinoline alkaloid biosynthesis	0	0	--	--	4	3	gene_Bol007100;gene_Bol017945;gene_Bol033758;gene_Bol044942	K14454+K00811+K00811+K00276
		Monobactam biosynthesis	1	1	gene_Bol014728	K13811	1	1	gene_Bol034268	K00928
		Phenylpropanoid biosynthesis	20	9	Brassica_oleracea_newGene_3749;Brassica_oleracea_newGene_5136;Brassica_oleracea_newGene_5137;gene_Bol005084;gene_Bol010394;gene_Bol013489;gene_Bol013783;gene_Bol015833;gene_Bol015835;gene_Bol016272;gene_Bol020121;gene_Bol020424;gene_Bol025102;gene_Bol026623;gene_Bol028365;gene_Bol030400;gene_Bol031505;gene_Bol037689;gene_Bol045599;gene_Bol045823	K09753+K13065+K13065+K10775+K05350+K01188+K05350+K00430+K00430+K01188+K00430+K18368+K10775+K01904+K22395+K09753+K00430+K10775+K01188+K13065	14	8	Brassica_oleracea_newGene_11372;gene_Bol007617;gene_Bol013632;gene_Bol015540;gene_Bol016898;gene_Bol018672;gene_Bol021943;gene_Bol024475;gene_Bol025599;gene_Bol028999;gene_Bol030909;gene_Bol030910;gene_Bol038389;gene_Bol038837	K00430+K12355+K23260+K00430+K09753+K09755+K05350+K00430+K00430+K00430+K05350+K05350+K01904+K13066
		Stilbenoid, diarylheptanoid and gingerol biosynthesis	3	1	Brassica_oleracea_newGene_5136;Brassica_oleracea_newGene_5137;gene_Bol045823	K13065+K13065+K13065	0	0	--	--
		Tropane, piperidine and pyridine alkaloid biosynthesis	1	1	gene_Bol017595	K08081	8	5	gene_Bol007100;gene_Bol017945;gene_Bol024496;gene_Bol028355;gene_Bol029656;gene_Bol033758;gene_Bol034926;gene_Bol044942	K14454+K00811+K08081+K08081+K08081+K00811+K00817+K00276
	Carbohydrate metabolism	Amino sugar and nucleotide sugar metabolism	8	7	Brassica_oleracea_newGene_2510;Brassica_oleracea_newGene_3331;gene_Bol017622;gene_Bol021627;gene_Bol034356;gene_Bol041033;gene_Bol042419;gene_Bol043354	K12447+K12447+K00770+K01183+K13379+K00847+K00820+K16190	11	8	Brassica_oleracea_newGene_11980;Brassica_oleracea_newGene_11983;Brassica_oleracea_newGene_2178;gene_Bol007321;gene_Bol012524;gene_Bol012568;gene_Bol012569;gene_Bol014864;gene_Bol021244;gene_Bol021751;gene_Bol043096	K01183+K01183+K01183+K20547+K00847+K12373+K12373+K13648+K13379+K17497+K00975
		Ascorbate and aldarate metabolism	7	4	Brassica_oleracea_newGene_2510;Brassica_oleracea_newGene_3331;Brassica_oleracea_newGene_7190;gene_Bol015809;gene_Bol022755;gene_Bol042279;gene_Bol043354	K12447+K12447+K00423+K00423+K00469+K00469+K16190	2	2	gene_Bol029036;gene_Bol036089	K00434+K00423
		Butanoate metabolism	0	0	--	--	4	3	gene_Bol012554;gene_Bol015117;gene_Bol021278;gene_Bol038539	K01580+K01580+K01653+K17761
		C5-Branched dibasic acid metabolism	0	0	--	--	1	1	gene_Bol021278	K01653
		Citrate cycle (TCA cycle)	0	0	--	--	2	2	gene_Bol011591;gene_Bol029048	K00025+K01681
		Fructose and mannose metabolism	4	4	gene_Bol013510;gene_Bol040742;gene_Bol041033;gene_Bol044221	K03841+K19355+K00847+K01803	6	4	Brassica_oleracea_newGene_8560;gene_Bol010410;gene_Bol012524;gene_Bol021751;gene_Bol027618;gene_Bol039120	K00895+K00895+K00847+K17497+K00895+K00850
		Galactose metabolism	6	3	Brassica_oleracea_newGene_2510;Brassica_oleracea_newGene_3331;gene_Bol016969;gene_Bol035230;gene_Bol035231;gene_Bol035232	K12447+K12447+K01193+K06617+K06617+K06617	1	1	gene_Bol039120	K00850
		Glycolysis / Gluconeogenesis	2	2	gene_Bol013510;gene_Bol044221	K03841+K01803	12	9	Brassica_oleracea_newGene_8560;gene_Bol010398;gene_Bol010410;gene_Bol012226;gene_Bol020546;gene_Bol021503;gene_Bol021505;gene_Bol025590;gene_Bol027580;gene_Bol027618;gene_Bol038918;gene_Bol039120	K00895+K00134+K00895+K01792+K00121+K00927+K00134+K00002+K18857+K00895+K01568+K00850
		Glyoxylate and dicarboxylate metabolism	1	1	gene_Bol021292	K01915	9	8	gene_Bol006999;gene_Bol011591;gene_Bol021423;gene_Bol022912;gene_Bol026973;gene_Bol027824;gene_Bol029048;gene_Bol033016;gene_Bol040444	K03781+K00025+K15919+K01915+K03781+K15893+K01681+K14272+K11517
		Inositol phosphate metabolism	8	6	gene_Bol015528;gene_Bol015926;gene_Bol022755;gene_Bol025649;gene_Bol042279;gene_Bol043772;gene_Bol044221;gene_Bol045172	K05857+K24221+K00469+K24221+K00469+K18081+K01803+K20279	4	3	gene_Bol009954;gene_Bol019547;gene_Bol024645;gene_Bol028841	K21797+K00888+K01858+K01858
		Pentose and glucuronate interconversions	5	4	Brassica_oleracea_newGene_2510;Brassica_oleracea_newGene_3331;gene_Bol015884;gene_Bol030394;gene_Bol043354	K12447+K12447+K01051+K01184+K16190	6	3	Brassica_oleracea_newGene_7272;gene_Bol020099;gene_Bol022847;gene_Bol023155;gene_Bol025590;gene_Bol031310	K01728+K01728+K01728+K01051+K00002+K01051
		Pentose phosphate pathway	1	1	gene_Bol013510	K03841	6	3	Brassica_oleracea_newGene_8560;gene_Bol010410;gene_Bol014038;gene_Bol022125;gene_Bol027618;gene_Bol039120	K00895+K00895+K00036+K00036+K00895+K00850
		Propanoate metabolism	1	1	gene_Bol015928	K00232	3	3	gene_Bol008791;gene_Bol031242;gene_Bol039786	K00166+K01961+K00232
		Pyruvate metabolism	0	0	--	--	4	4	gene_Bol008622;gene_Bol011591;gene_Bol021608;gene_Bol031242	K18881+K00025+K01069+K01961
		Starch and sucrose metabolism	15	11	Brassica_oleracea_newGene_5241;gene_Bol010394;gene_Bol011069;gene_Bol013489;gene_Bol013783;gene_Bol016272;gene_Bol016969;gene_Bol018953;gene_Bol028526;gene_Bol030097;gene_Bol032918;gene_Bol041033;gene_Bol042431;gene_Bol044353;gene_Bol045599	K00695+K05350+K19892+K01188+K05350+K01188+K01193+K16055+K01087+K01179+K19891+K00847+K01177+K19892+K01188	19	9	Brassica_oleracea_newGene_1037;gene_Bol007662;gene_Bol009562;gene_Bol011065;gene_Bol012524;gene_Bol015218;gene_Bol017338;gene_Bol021943;gene_Bol025773;gene_Bol026267;gene_Bol030909;gene_Bol030910;gene_Bol033710;gene_Bol038546;gene_Bol038938;gene_Bol039565;gene_Bol040813;gene_Bol043096;gene_Bol043325	K19891+K19891+K01179+K19892+K00847+K19891+K19891+K05350+K00695+K00695+K05350+K05350+K19893+K00695+K19891+K19892+K01214+K00975+K19891
	Energy metabolism	Carbon fixation in photosynthetic organisms	2	2	gene_Bol013510;gene_Bol044221	K03841+K01803	6	5	gene_Bol007100;gene_Bol010398;gene_Bol011591;gene_Bol021503;gene_Bol021505;gene_Bol033016	K14454+K00134+K00025+K00927+K00134+K14272
		Nitrogen metabolism	5	3	gene_Bol004811;gene_Bol021292;gene_Bol024541;gene_Bol041181;gene_Bol041182	K02575+K01915+K00261+K02575+K02575	3	2	Brassica_oleracea_newGene_6341;gene_Bol022912;gene_Bol032993	K01673+K01915+K01673
		Oxidative phosphorylation	2	2	gene_Bol009394;gene_Bol038955	K02155+K02132	4	3	gene_Bol008795;gene_Bol013699;gene_Bol024593;gene_Bol041494	K02133+K03884+K02133+K01507
		Photosynthesis	3	3	gene_Bol036864;gene_Bol036868;gene_Bol038968	K02634+K02703+K02705	1	1	gene_Bol026114	K02723
		Photosynthesis - antenna proteins	1	1	gene_Bol025385	K08915	0	0	--	--
		Sulfur metabolism	2	2	gene_Bol014728;gene_Bol035128	K13811+K17725	2	2	gene_Bol009977;gene_Bol038520	K17285+K01011
	Global and overview maps	2-Oxocarboxylic acid metabolism	1	1	gene_Bol036769	K00826	8	7	gene_Bol007100;gene_Bol017945;gene_Bol021278;gene_Bol023744;gene_Bol029048;gene_Bol033016;gene_Bol033758;gene_Bol034268	K14454+K00811+K01653+K00053+K01681+K14272+K00811+K00928
		Biosynthesis of amino acids	8	7	gene_Bol021292;gene_Bol024863;gene_Bol024864;gene_Bol028822;gene_Bol032277;gene_Bol036026;gene_Bol036769;gene_Bol044221	K01915+K01953+K01953+K00891+K01850+K05359+K00826+K01803	20	18	Brassica_oleracea_newGene_3720;Brassica_oleracea_newGene_8595;gene_Bol007100;gene_Bol010398;gene_Bol013252;gene_Bol017945;gene_Bol021278;gene_Bol021503;gene_Bol021505;gene_Bol022912;gene_Bol023744;gene_Bol029048;gene_Bol033016;gene_Bol033758;gene_Bol034268;gene_Bol034305;gene_Bol034926;gene_Bol039120;gene_Bol039897;gene_Bol043141	K01696+K01620+K14454+K00134+K00058+K00811+K01653+K00927+K00134+K01915+K00053+K01681+K14272+K00811+K00928+K00286+K00817+K00850+K00611+K14152
		Carbon metabolism	4	4	gene_Bol013510;gene_Bol015928;gene_Bol024541;gene_Bol044221	K03841+K00232+K00261+K01803	20	17	gene_Bol006999;gene_Bol007100;gene_Bol010398;gene_Bol011591;gene_Bol013252;gene_Bol014038;gene_Bol020546;gene_Bol021423;gene_Bol021503;gene_Bol021505;gene_Bol022125;gene_Bol026973;gene_Bol027824;gene_Bol029048;gene_Bol031242;gene_Bol033016;gene_Bol039120;gene_Bol039786;gene_Bol040444;gene_Bol044510	K03781+K14454+K00134+K00025+K00058+K00036+K00121+K15919+K00927+K00134+K00036+K03781+K15893+K01681+K01961+K14272+K00850+K00232+K11517+K00297
		Fatty acid metabolism	4	4	gene_Bol015928;gene_Bol018920;gene_Bol029614;gene_Bol043251	K00232+K01074+K01897+K10251	3	3	gene_Bol031242;gene_Bol033326;gene_Bol039786	K01961+K00645+K00232
	Glycan biosynthesis and metabolism	Glycosaminoglycan degradation	0	0	--	--	2	1	gene_Bol012568;gene_Bol012569	K12373+K12373
		Glycosphingolipid biosynthesis - ganglio series	0	0	--	--	2	1	gene_Bol012568;gene_Bol012569	K12373+K12373
		Glycosphingolipid biosynthesis - globo and isoglobo series	0	0	--	--	2	1	gene_Bol012568;gene_Bol012569	K12373+K12373
		Glycosylphosphatidylinositol (GPI)-anchor biosynthesis	1	1	gene_Bol021224	K03860	0	0	--	--
		N-Glycan biosynthesis	1	1	gene_Bol006927	K01001	6	5	gene_Bol015274;gene_Bol015376;gene_Bol019265;gene_Bol024452;gene_Bol027638;gene_Bol027866	K03850+K03844+K12670+K03844+K12666+K01228
		Other glycan degradation	0	0	--	--	8	5	gene_Bol010485;gene_Bol012568;gene_Bol012569;gene_Bol013649;gene_Bol017005;gene_Bol026123;gene_Bol026390;gene_Bol034262	K01206+K12373+K12373+K15923+K01444+K01206+K01206+K01191
		Other types of O-glycan biosynthesis	1	1	gene_Bol006934	K18134	2	2	gene_Bol013149;gene_Bol037797	K20783+K20784
		Various types of N-glycan biosynthesis	0	0	--	--	6	4	gene_Bol012568;gene_Bol012569;gene_Bol015376;gene_Bol019265;gene_Bol024452;gene_Bol027638	K12373+K12373+K03844+K12670+K03844+K12666
	Lipid metabolism	Arachidonic acid metabolism	4	3	Brassica_oleracea_newGene_8732;gene_Bol005479;gene_Bol028016;gene_Bol030273	K18592+K14674+K08726+K08726	3	2	gene_Bol006047;gene_Bol029457;gene_Bol037212	K08726+K00432+K08726
		Biosynthesis of unsaturated fatty acids	2	2	gene_Bol015928;gene_Bol043251	K00232+K10251	1	1	gene_Bol039786	K00232
		Cutin, suberine and wax biosynthesis	3	3	gene_Bol027110;gene_Bol030226;gene_Bol039789	K20769+K15398+K15406	1	1	gene_Bol013804	K13356
		Ether lipid metabolism	4	2	Brassica_oleracea_newGene_7830;Brassica_oleracea_newGene_7831;Brassica_oleracea_newGene_8523;gene_Bol005479	K00993+K00993+K00993+K14674	0	0	--	--
		Fatty acid biosynthesis	1	1	gene_Bol029614	K01897	2	2	gene_Bol031242;gene_Bol033326	K01961+K00645
		Fatty acid degradation	2	2	gene_Bol015928;gene_Bol029614	K00232+K01897	3	3	gene_Bol020546;gene_Bol027580;gene_Bol039786	K00121+K18857+K00232
		Fatty acid elongation	2	2	gene_Bol018920;gene_Bol043251	K01074+K10251	0	0	--	--
		Glycerolipid metabolism	5	4	Brassica_oleracea_newGene_6067;gene_Bol005479;gene_Bol007605;gene_Bol035146;gene_Bol041900	K18693+K14674+K21362+K00679+K00679	6	5	gene_Bol008565;gene_Bol008838;gene_Bol025590;gene_Bol026261;gene_Bol031619;gene_Bol035149	K00679+K00901+K00002+K01054+K16816+K00679
		Glycerophospholipid metabolism	9	6	Brassica_oleracea_newGene_6067;Brassica_oleracea_newGene_7830;Brassica_oleracea_newGene_7831;Brassica_oleracea_newGene_8523;gene_Bol005479;gene_Bol013293;gene_Bol020109;gene_Bol037159;gene_Bol041048	K18693+K00993+K00993+K00993+K14674+K00968+K06130+K16818+K16818	4	4	gene_Bol008838;gene_Bol012590;gene_Bol026753;gene_Bol028769	K00901+K01126+K06130+K22389
		Linoleic acid metabolism	2	2	gene_Bol005479;gene_Bol034868	K14674+K00454	0	0	--	--
		Sphingolipid metabolism	0	0	--	--	1	1	gene_Bol025273	K12349
		Steroid biosynthesis	3	3	gene_Bol005479;gene_Bol016483;gene_Bol043377	K14674+K00511+K01052	2	2	gene_Bol034675;gene_Bol044642	K00801+K23558
		alpha-Linolenic acid metabolism	6	5	gene_Bol005479;gene_Bol015928;gene_Bol034868;gene_Bol035942;gene_Bol037159;gene_Bol041048	K14674+K00232+K00454+K01723+K16818+K16818	4	4	gene_Bol027580;gene_Bol028769;gene_Bol029161;gene_Bol039786	K18857+K22389+K10525+K00232
	Metabolism of cofactors and vitamins	Biotin metabolism	3	1	Brassica_oleracea_newGene_4799;gene_Bol010215;gene_Bol039152	K19562+K19562+K19562	0	0	--	--
		Folate biosynthesis	1	1	gene_Bol015852	K14652	1	1	gene_Bol007265	K01633
		Nicotinate and nicotinamide metabolism	1	1	gene_Bol034850	K03787	2	2	gene_Bol018628;gene_Bol028321	K00763+K03787
		One carbon pool by folate	0	0	--	--	1	1	gene_Bol044510	K00297
		Pantothenate and CoA biosynthesis	1	1	gene_Bol036769	K00826	3	3	gene_Bol021278;gene_Bol023744;gene_Bol023768	K01653+K00053+K17839
		Porphyrin and chlorophyll metabolism	1	1	gene_Bol033160	K13544	2	2	gene_Bol008821;gene_Bol023899	K01749+K01698
		Riboflavin metabolism	1	1	gene_Bol015852	K14652	0	0	--	--
		Thiamine metabolism	1	1	gene_Bol023188	K20896	1	1	gene_Bol038894	K03146
		Ubiquinone and other terpenoid-quinone biosynthesis	1	1	gene_Bol026623	K01904	2	2	gene_Bol030730;gene_Bol038389	K02552+K01904
	Metabolism of other amino acids	Cyanoamino acid metabolism	8	4	Brassica_oleracea_newGene_8732;gene_Bol010394;gene_Bol011217;gene_Bol013489;gene_Bol013783;gene_Bol016272;gene_Bol034760;gene_Bol045599	K18592+K05350+K13051+K01188+K05350+K01188+K13051+K01188	4	2	gene_Bol021943;gene_Bol030909;gene_Bol030910;gene_Bol043823	K05350+K05350+K05350+K13051
		Glutathione metabolism	2	2	Brassica_oleracea_newGene_8732;gene_Bol017378	K18592+K00799	10	6	gene_Bol006068;gene_Bol014038;gene_Bol022125;gene_Bol029036;gene_Bol029457;gene_Bol030278;gene_Bol030660;gene_Bol032468;gene_Bol033288;gene_Bol033289	K00799+K00036+K00036+K00434+K00432+K00797+K00799+K22596+K00799+K00799
		Phosphonate and phosphinate metabolism	4	2	Brassica_oleracea_newGene_7830;Brassica_oleracea_newGene_7831;Brassica_oleracea_newGene_8523;gene_Bol013293	K00993+K00993+K00993+K00968	0	0	--	--
		Selenocompound metabolism	2	2	gene_Bol006849;gene_Bol014728	K00384+K13811	0	0	--	--
		Taurine and hypotaurine metabolism	1	1	Brassica_oleracea_newGene_8732	K18592	2	1	gene_Bol012554;gene_Bol015117	K01580+K01580
		beta-Alanine metabolism	1	1	gene_Bol015928	K00232	5	4	gene_Bol012554;gene_Bol015117;gene_Bol023768;gene_Bol039786;gene_Bol044942	K01580+K01580+K17839+K00232+K00276
	Metabolism of terpenoids and polyketides	Carotenoid biosynthesis	4	2	gene_Bol005615;gene_Bol006111;gene_Bol024384;gene_Bol032060	K09843+K09841+K09843+K09843	4	3	gene_Bol018079;gene_Bol019241;gene_Bol035582;gene_Bol037233	K09843+K09838+K09840+K09838
		Sesquiterpenoid and triterpenoid biosynthesis	1	1	gene_Bol016483	K00511	3	2	gene_Bol021540;gene_Bol021541;gene_Bol034675	K15815+K15815+K00801
		Terpenoid backbone biosynthesis	1	1	gene_Bol013657	K03527	3	2	gene_Bol007930;gene_Bol019430;gene_Bol032842	K00787+K00099+K00787
		Zeatin biosynthesis	3	3	gene_Bol012032;gene_Bol014258;gene_Bol044004	K23452+K00279+K13493	2	2	gene_Bol034581;gene_Bol036074	K00791+K00279
	Nucleotide metabolism	Purine metabolism	3	3	gene_Bol009551;gene_Bol014728;gene_Bol034850	K01510+K13811+K03787	7	6	gene_Bol007596;gene_Bol010462;gene_Bol023103;gene_Bol028321;gene_Bol032668;gene_Bol039959;gene_Bol044448	K01939+K01427+K00856+K03787+K01488+K01952+K01939
		Pyrimidine metabolism	2	2	gene_Bol009551;gene_Bol034850	K01510+K03787	2	2	gene_Bol008617;gene_Bol028321	K13421+K03787
Organismal Systems	Environmental adaptation	Circadian rhythm - plant	3	2	gene_Bol013615;gene_Bol017906;gene_Bol029986	K12126+K03097+K12126	3	2	gene_Bol010854;gene_Bol022961;gene_Bol030655	K12126+K12121+K12126
		Plant-pathogen interaction	46	21	Brassica_oleracea_newGene_10056;Brassica_oleracea_newGene_10185;Brassica_oleracea_newGene_11855;Brassica_oleracea_newGene_11868;Brassica_oleracea_newGene_2177;Brassica_oleracea_newGene_329;Brassica_oleracea_newGene_5044;Brassica_oleracea_newGene_7776;gene_Bol004475;gene_Bol005080;gene_Bol005121;gene_Bol005623;gene_Bol009568;gene_Bol009729;gene_Bol010737;gene_Bol011480;gene_Bol014264;gene_Bol01538…	K13466+K16224+K13457+K13412+K13457+K13449+K16225+K13460+K16226+K13436+K16225+K16225+K09487+K13430+K13448+K13425+K13430+K13412+K13425+K13457+K13424+K02183+K16224+K13436+K16225+K18834+K05391+K16226+K13448+K13448+K18834+K13412+K13430+K16226+K16225+K16226+K13459+K18835+K13430+K13448+K13430+K16224+K13426+K02183+K13456+K13424	19	12	gene_Bol004842;gene_Bol005602;gene_Bol005783;gene_Bol006102;gene_Bol010135;gene_Bol011094;gene_Bol013343;gene_Bol017122;gene_Bol018715;gene_Bol020597;gene_Bol022023;gene_Bol023755;gene_Bol025523;gene_Bol028489;gene_Bol030279;gene_Bol035801;gene_Bol036767;gene_Bol039093;gene_Bol043376	K18878+K13459+K13430+K13466+K13459+K13416+K13447+K13412+K13412+K16225+K16224+K13430+K16224+K13430+K05391+K13436+K18878+K13430+K13420
