# Supplementary material for: Transcriptome Analysis Reveals the Mechanism by Which Exogenous Melatonin Treatment Delays Leaf Senescence of Postharvest Chinese Kale (Brassica oleracea var. alboglabra)
Source: Int J Mol Sci. 2024 Feb 13;25(4):2250. doi: 10.3390/ijms25042250 (PMC10889248; doi:10.3390/ijms25042250)
Supplement: Supplementary file 1 [file ijms-25-02250-s001.zip › Di et al. Supplementary Table S5.xlsx]

## Sheet: Sheet1
Supplementary Table 5 Sequencing statistics of the transcriptome from five groups of postharvest Chinese kale
Samples	Clean reads	Clean bases	GC(%)	Q20(%)	Q30(%)	Total Reads	Mapped Reads	Mapping Rate
C0-1	24114783	7212371712	47.61	98.14	94.89	48229566	35570139	0.7375
C0-2	25184413	7533555686	47.83	98.38	95.48	50368826	37140258	0.7374
C0-3	22993185	6881048686	47.73	98.29	95.2	45986370	34109940	0.7417
C3-1	24296504	7271240856	47.2	98.2	95.06	48593008	33772967	0.695
C3-2	25504070	7630132710	47.23	98.42	95.61	51008140	35912898	0.7041
C3-3	23381001	6997030590	47.15	98.41	95.56	46762002	33323276	0.7126
C5-1	25424982	7608582890	47.79	98.44	95.58	50849964	33412474	0.6571
C5-2	24211491	7246509582	47.05	98.21	95.04	48422982	33938228	0.7009
C5-3	23037198	6888594740	47.04	98.02	94.51	46074396	31554787	0.6849
M3-1	23195644	6941882904	47.05	98.28	95.24	46391288	32521359	0.701
M3-2	23356175	6986617544	47.12	98.44	95.62	46712350	32932053	0.705
M3-3	22432579	6713969270	47.5	98.34	95.38	44865158	31344750	0.6986
M5-1	23921061	7159217808	46.87	98.31	95.26	47842122	32900093	0.6877
M5-2	25683429	7686597410	47.44	98.39	95.46	51366858	34849392	0.6784
M5-3	24561300	7349829728	47.54	98.35	95.35	49122600	32483124	0.6613
Notes：Each treatment has three biological replicates.
