# Supplementary material for: Transcriptome Analysis Reveals the Mechanism by Which Exogenous Melatonin Treatment Delays Leaf Senescence of Postharvest Chinese Kale (Brassica oleracea var. alboglabra)
Source: Int J Mol Sci. 2024 Feb 13;25(4):2250. doi: 10.3390/ijms25042250 (PMC10889248; doi:10.3390/ijms25042250)
Supplement: Supplementary file 1 [file ijms-25-02250-s001.zip › Di et al. Supplementary Table S6.xlsx]

## Sheet: Sheet1
Supplementary Table 6 Primer sequences used in this study for qRT-PCR
Gene ID	Gene name	Forward primer sequence (5’-3’)	Reverse primer sequence (5’-3’)
Bol024384	CYP707A	CCTAACGTCTTTTTCGCATCAA	TAACATCCTCTCTTTACTCGCC
Bol025102	PAL	CTTCCGGATTCTTCGATCTACA	GATTGAACGTTCGCTTCGAATA
Bol020424	CSE	CACACTACACATCAATTTGCGA	CTTCTGCGATCTTACACATTGG
Bol024486	FLS	CAAGAAGCGTTTGGAGGTAAAA	GAATGAGAAGAGAGACCGAGAG
Bol034868	LOX2S	TACAACGACATAGGTAATCCCG	GACATTAGGTCGGTATCTGAGG
Bol035942	AOS	ATTCAATTGAGAAAGAGCTCGC	TCTTCTATGATTGACGGTAGCC
Bol015928	ACOX1	ATCACGTCTCCTACAAAGTGTT	CAAGAGATGATTCAAGCATCGG
Bol044030	PYL	CAGGCTAGAGAACTACAGATCG	TATCCACGAAGCTAACAGTCTC
Bol044840	JAZ	CAACACAAGATCCAGTTCGATC	GATATGGTGCCTTTGACGTAAC
Bol014220	TCH4	TGGAATCTATTGGCACTCTGTT	TGTGAAAGGAGCTTTAGACCAA
